# Supplementary material for: Impact of air, laser pulse width and fluence on U–Pb dating of zircons by LA-ICPMS
Source: Royal Society of Chemistry journal article supplement (doi:10.1039/c7ja00357a), 2018-01-01
Supplement: c7ja00357a1.xlsx [file c7ja00357a1.xlsx]

## Sheet: 20ns_Pulse Width Laser
2015, Dept. E.Sci, Uni. of Tasmania								Data for Tera-Wasserburg plot2					Data for Wetherill plot3									Dates3										Ablation rate relative to average of primary standard (91500)
Identifier	Year	File number	Comments	f206c	206Pb cps	Uppm1	Th/U	238U/206Pb	1s	207Pb/206Pb	1s	207Pb/235U	1s	206Pb/238U	1s	Rho	208Pb/232Th	1s	207Pb/206Pb	2s	2ssys	206Pb/238U	2s	2ssys	207Pb/235U	2s	2ssys	208Pb/232Th	2s	2ssys	% conc4
	Analysed								abs		abs		abs		abs			abs		abs	abs		abs	abs		abs	abs		abs	abs
91500	2015	AP29A041	ok	0.00113705	23636.2	82.2395	0.360098	5.62219	0.0736138	0.07546	0.00113065	1.84979	0.0368077	0.177867	0.00232888	0.658019	0.0548063	0.00117585	1079.91	60.1283	60.3992	1055.31	27.6352	29.6062	1063.36	42.3179	43.6621	1078.47	46.2761	49.2189	97.7222	1.01306								91500 - errors from TIMS in Horstwood et al. 2016 and Wiedenbeck 1995 (208Pb/232Th age only). NIST610 errors for 7/6Pb ratios are from Baker et al. 2004. All 2 sigma
91500	2015	AP29A376	ok	0.000755736	23511.2	81.9244	0.352263	5.621	0.0719755	0.0751478	0.00101557	1.84253	0.0343027	0.177904	0.00227802	0.687793	0.0531414	0.00123187	1071.58	54.3003	54.5956	1055.52	27.0312	29.044	1060.77	39.4969	40.9269	1046.54	48.5194	51.1738	98.5006	1.02336	Systematic Errors:							76 error %	206/238 error %	207/235 error%	208/232 error %
91500	2015	AP29A090	ok	-0.000194651	24437.8	84.2428	0.353809	5.6123	0.0704849	0.0744064	0.0010826	1.82718	0.0351193	0.17818	0.00223776	0.653416	0.0549661	0.0010536	1051.63	58.6366	58.9	1057.02	26.5503	28.6026	1055.27	40.5655	41.945	1081.53	41.4619	44.7405	100.513	1.01608	1) Uncertaintly in Primary Ref. Material.							0.00549535	0.04	0.06	0.26465
91500	2015	AP29A375	ok	0.000798627	23496.1	82.5666	0.355203	5.6027	0.0709015	0.0753016	0.00113018	1.85233	0.0363646	0.178485	0.00225871	0.644612	0.0534769	0.00103751	1075.69	60.2676	60.5358	1058.69	26.7953	28.8363	1064.26	41.7866	43.1496	1052.98	40.8579	44.0143	98.42	0.964527	2) Long Term variance in secondary stds.							0.5	1	1	1.5
91500	2015	AP29A180	ok	0.0012392	23632.4	84.0386	0.353509	5.59827	0.0750465	0.0757	0.00114367	1.8636	0.0376407	0.178626	0.00239454	0.6637	0.0552188	0.00141837	1086.27	60.5704	60.8425	1059.47	28.4049	30.3406	1068.27	43.1533	44.4842	1086.37	55.8097	58.3085	97.5321	0.97344	3)Decay constant errors							0.173046	0.107	0.136	0.31		Decay constant errors from Jaffey et al. 1971 and Amelin and Zaitsev 2002 (232Th)
91500	2015	AP29A265	ok	0.000169952	23736.6	81.2884	0.358273	5.59766	0.0740371	0.0748068	0.00101129	1.84182	0.0348339	0.178646	0.00236285	0.699337	0.053039	0.00107928	1062.44	54.3925	54.6823	1059.57	28.0288	29.9891	1060.51	40.1145	41.5226	1044.57	42.5117	45.5069	99.7303	1.00954	4) Model common Pb uncertainty							No correction applied	No correction applied	No correction applied
91500	2015	AP29A159	ok	-1.56097e-06	24510.2	83.7115	0.353834	5.59226	0.0705691	0.0746978	0.0011835	1.84091	0.0372877	0.178819	0.00225652	0.623009	0.0546625	0.00118709	1059.51	63.7754	64.0213	1060.52	26.7654	28.8154	1060.19	42.9482	44.2655	1075.71	46.722	49.6239	100.095		Total systematic uncertainty							0.279975	1.01305	1.0221	2.41614
91500	2015	AP29A139	ok	0.00181304	25370.7	84.1631	0.356309	5.56647	0.093658	0.0763893	0.0017346	1.89132	0.0534518	0.179647	0.00302263	0.595344	0.0559602	0.00175358	1104.42	90.7925	90.9804	1065.05	35.8396	37.4084	1078.04	60.9346	61.9017	1100.57	68.9749	71.0647	96.4348
91500	2015	AP29A024	ok	-0.000350516	22165.7	78.611	0.357404	5.57574	0.0697099	0.0745126	0.00105161	1.84179	0.0347259	0.179348	0.00224228	0.663099	0.0544522	0.00126798	1054.51	56.8519	57.125	1063.41	26.5904	28.6637	1060.5	39.9903	41.4026	1071.68	49.9107	52.6172	100.845
91500	2015	AP29A066	ok	-0.000179579	24078	82.8592	0.351977	5.57544	0.0711462	0.074658	0.0010854	1.84548	0.0356993	0.179358	0.00228872	0.659663	0.0533163	0.00108752	1058.43	58.5302	58.7976	1063.47	27.141	29.1754	1061.82	41.08	42.4595	1049.9	42.8304	45.8342	100.475
91500	2015	AP29A358	ok	-0.00055151	23424.1	83.2711	0.354121	5.57333	0.070062	0.0743597	0.000932155	1.8388	0.0326445	0.179426	0.00225555	0.708097	0.054418	0.00106715	1050.37	50.5292	50.8339	1063.84	26.7468	28.8105	1059.43	37.6165	39.1116	1071.03	42.0063	45.185	101.282
91500	2015	AP29A340	ok	-0.000746711	23689.1	82.4191	0.353257	5.57042	0.0674577	0.0742149	0.000973389	1.83618	0.0327786	0.17952	0.00217398	0.678373	0.0547402	0.0011245	1046.44	52.8986	53.1876	1064.35	25.7785	27.9158	1058.49	37.7914	39.2774	1077.2	44.2566	47.3182	101.712
91500	2015	AP29A203	ok	-0.000959501	25481.3	83.0771	0.34941	5.57035	0.0839227	0.0740368	0.00156093	1.8318	0.0474674	0.179522	0.00270467	0.581405	0.0563835	0.00140578	1041.59	85.0946	85.2729	1064.36	32.0713	33.8132	1056.92	54.7762	55.8087	1108.67	55.2835	57.9072	102.186
91500	2015	AP29A303	ok	-0.000804158	23987.8	80.1558	0.356905	5.56777	0.0726485	0.0741841	0.00120622	1.83629	0.0382827	0.179605	0.0023435	0.62587	0.0525706	0.00131152	1045.6	65.5871	65.8201	1064.82	27.7876	29.7827	1058.53	44.1363	45.4152	1035.58	51.6708	54.1201	101.838
91500	2015	AP29A116	ok	0.000152498	23923.6	84.7524	0.356814	5.55844	0.0684213	0.0750483	0.000852306	1.8608	0.0311648	0.179906	0.00221455	0.734976	0.0509269	0.00118708	1068.92	45.6495	45.9985	1066.46	26.2551	28.3646	1067.27	35.7495	37.3423	1003.99	46.8053	49.3384	99.7701
91500	2015	AP29A246	ok	0.000751348	23826.6	81.7545	0.359349	5.65573	0.0719362	0.074923	0.00109715	1.82574	0.0354125	0.176812	0.00224889	0.655752	0.0531982	0.00115642	1065.56	58.8915	59.1608	1049.53	26.6983	28.7122	1054.75	40.9164	42.2831	1047.63	45.5468	48.3703	98.4958
91500	2015	AP29A004	ok	-0.00011247	24841.7	85.0868	0.363393	5.54563	0.0705147	0.0749106	0.00102813	1.86168	0.0348313	0.180322	0.00229286	0.679615	0.0532898	0.00122127	1065.23	55.1987	55.4857	1068.73	27.1787	29.23	1067.58	39.9482	41.3805	1049.39	48.0988	50.7894	100.329
91500	2015	AP29A003	ok	-0.000199602	23578.6	81.6789	0.357804	5.52983	0.0697379	0.0749425	0.00111597	1.86779	0.0364476	0.180837	0.00228058	0.646274	0.0544066	0.00117595	1066.08	59.8814	60.1465	1071.55	27.0271	29.0995	1069.75	41.7496	43.1277	1070.81	46.2891	49.1907	100.512
91500	2015	AP29A321	ok	-0.000330896	23838.1	80.2954	0.357219	5.51773	0.0774812	0.0749132	0.00105205	1.87116	0.0371605	0.181234	0.00254493	0.707073	0.0543349	0.00119087	1065.3	56.4801	56.7607	1073.71	30.1546	32.0326	1070.94	42.537	43.8933	1069.43	46.8779	49.738	100.79
91500	2015	AP29A224	ok	0.000309652	26083.3	82.7302	0.357523	5.5364	0.0767577	0.0753262	0.00113515	1.87513	0.0383972	0.180623	0.00250418	0.677057	0.0546957	0.00130321	1076.35	60.5069	60.7743	1070.38	29.6797	31.5746	1072.34	43.917	45.2353	1076.35	51.2914	53.9511	99.4453
91500	2015	AP29A284	ok	0.0003234	23506.4	81.7336	0.359886	5.59571	0.073536	0.0749482	0.00110377	1.84594	0.0364352	0.178708	0.0023485	0.665799	0.05564	0.00128067	1066.24	59.2208	59.4889	1059.92	27.8578	29.8306	1061.98	41.9228	43.2758	1094.44	50.3814	53.176	99.4071
91500	2015	AU14A118	ok	0.00126733	24123.5	66.6697	0.36695	5.61782	0.0583584	0.0755973	0.000780513	1.8546	0.0271628	0.178005	0.00184913	0.70927	0.051871	0.000977526	1083.55	41.41	41.805	1056.07	21.941	24.3801	1065.07	31.1983	33.0042	1022.14	38.5252	41.6728	97.4631
91500	2015	AU14A019	ok	0.000378137	23880.7	69.1193	0.362322	5.60021	0.0594026	0.0749649	0.00100255	1.84487	0.031491	0.178565	0.00189407	0.621414	0.0538698	0.0011811	1066.69	53.7745	54.0698	1059.13	22.4688	24.8694	1061.6	36.2419	37.7977	1060.51	46.5037	49.3389	99.2915
91500	2015	AU14A041	ok	0.000324369	23751.4	66.5077	0.361917	5.59594	0.0612297	0.0749475	0.00090836	1.84585	0.0301398	0.178701	0.00195531	0.67011	0.0524047	0.00103009	1066.22	48.7369	49.0624	1059.87	23.1939	25.5295	1061.95	34.6799	36.3037	1032.39	40.5865	43.6439	99.405
91500	2015	AU14A081	ok	-0.00193469	23432.4	64.2996	0.359349	5.59245	0.0597172	0.0730745	0.00080412	1.80084	0.0276131	0.178813	0.00190939	0.696399	0.0542905	0.00113685	1015.14	44.5923	44.9146	1060.48	22.6481	25.0373	1045.76	32.0703	33.7681	1068.58	44.7524	47.7354	104.467
91500	2015	AU14A119	ok	-0.000819057	23270.1	66.7084	0.353766	5.59146	0.0610562	0.0740171	0.000874434	1.8244	0.0293499	0.178844	0.0019529	0.678763	0.053859	0.0010646	1041.06	47.6866	48.0037	1060.66	23.1638	25.5055	1054.27	33.921	35.5561	1060.31	41.917	45.0408	101.883
91500	2015	AU14A062	ok	0.000657498	23564.5	63.8494	0.364734	5.585	0.0607152	0.0752981	0.000781097	1.85812	0.0279205	0.179051	0.00194648	0.723475	0.054825	0.00100456	1075.6	41.6551	42.0421	1061.79	23.0856	25.4393	1066.32	32.0455	33.8102	1078.83	39.5347	42.9442	98.7162
91500	2015	AU14A040	ok	0.000199439	24714.5	67.8436	0.366933	5.58408	0.0584845	0.0749197	0.000771628	1.84909	0.0271615	0.179081	0.00187559	0.713006	0.0542537	0.000992821	1065.47	41.4207	41.8026	1061.95	22.2445	24.6792	1063.1	31.2322	33.0297	1067.88	39.0834	42.4622	99.6692
91500	2015	AU14A094	ok	-0.000577028	23865.6	66.8748	0.366164	5.58292	0.0583084	0.0742757	0.000790927	1.83357	0.0273485	0.179118	0.00187072	0.70022	0.0532266	0.00101378	1048.09	42.9368	43.2935	1062.15	22.1864	24.6278	1057.56	31.5479	33.3104	1048.17	39.9281	43.1243	101.342
91500	2015	AU14A105	ok	0.00044318	24441.5	67.3609	0.367856	5.57723	0.0600396	0.075169	0.000811808	1.85752	0.0283247	0.179301	0.0019302	0.705971	0.0531444	0.00102909	1072.15	43.3896	43.7589	1063.15	22.89	25.2677	1066.1	32.5134	34.2534	1046.6	40.5328	43.6757	99.1608
91500	2015	AU14A061	ok	-0.000740151	23540.2	63.9676	0.360191	5.57221	0.0588473	0.0742087	0.000855445	1.83544	0.0286949	0.179462	0.00189527	0.675513	0.0527788	0.000973051	1046.27	46.494	46.8224	1064.03	22.4742	24.8955	1058.23	33.0883	34.7749	1039.58	38.3321	41.5989	101.698
91500	2015	AU14A020	ok	0.0010932	23979.6	66.4989	0.365827	5.57193	0.061914	0.0757493	0.00083641	1.87364	0.0293506	0.179471	0.00199424	0.709336	0.0556512	0.00100233	1087.58	44.26	44.6325	1064.08	23.6478	25.96	1071.82	33.5801	35.2851	1094.65	39.4312	42.9457	97.8398
91500	2015	AU14A004	ok	-2.8488e-05	23825.2	67.4189	0.370157	5.56437	0.0596564	0.0748574	0.000889341	1.85409	0.0296705	0.179715	0.00192674	0.669955	0.0532294	0.00106722	1063.8	47.7913	48.1216	1065.42	22.8449	25.2365	1064.89	34.0822	35.7421	1048.23	42.0329	45.0804	100.152
91500	2015	AU14A082	ok	0.00117392	23392.7	64.4024	0.361795	5.55579	0.0586236	0.0759232	0.000838395	1.88339	0.0287661	0.179992	0.00189924	0.690854	0.0544762	0.00107295	1092.17	44.2331	44.609	1066.93	22.5161	24.9458	1075.26	32.846	34.5981	1072.14	42.2331	45.4023	97.6888
91500	2015	AU14A104	ok	-0.000735797	25576.9	68.7231	0.366848	5.55339	0.0586313	0.074336	0.00084451	1.84482	0.0286115	0.18007	0.00190114	0.680747	0.0558883	0.00105377	1049.73	45.7972	46.1328	1067.36	22.5378	24.9673	1061.58	32.9284	34.6333	1099.19	41.4504	44.8336	101.68
91500	2015	AU14A003	ok	-0.000173323	25102.9	70.4673	0.371906	5.55886	0.0561294	0.0747721	0.000851706	1.85382	0.0282184	0.179893	0.00181643	0.663344	0.0531856	0.00106468	1061.51	45.8368	46.1796	1066.39	21.5353	24.0618	1064.79	32.416	34.1567	1047.39	41.9336	44.9831	100.46
91500	2015	AU14A093	ok	-0.000547949	18419.9	66.3234	0.380421	5.59688	0.0695441	0.0742094	0.00149438	1.82736	0.0432397	0.178671	0.00222008	0.525118	0.057906	0.00153225	1046.29	81.2194	81.4079	1059.71	26.3349	28.4128	1055.33	49.9433	51.0702	1137.78	60.2134	62.7569	101.283
91500	2015	MY25B2323	ok	0.00168389	21808.7	62.5762	0.361487	5.62309	0.0465463	0.075913	0.00103654	1.8606	0.0297091	0.177838	0.00147209	0.51841	0.0543935	0.00106232	1091.9	54.6967	55.001	1055.15	17.4685	20.4435	1067.2	34.081	35.7481	1070.55	41.8164	45.0058	96.6342
91500	2015	MY25B2036	ok	0.00141685	22293.4	62.6941	0.360212	5.60289	0.0458637	0.0758191	0.00104144	1.865	0.0298213	0.178479	0.00146098	0.511928	0.0540265	0.00101223	1089.43	55.0435	55.3445	1058.66	17.3318	20.3453	1068.76	34.1789	35.8461	1063.52	39.8517	43.1444	97.1761
91500	2015	MY25B2300	ok	0.000913995	22598.6	62.9537	0.361273	5.59627	0.0462305	0.0754401	0.000996703	1.85787	0.0289492	0.17869	0.00147615	0.530162	0.0536791	0.00112219	1079.38	53.0232	53.3299	1059.82	17.5102	20.5035	1066.23	33.2278	34.9326	1056.86	44.1884	47.1433	98.1878
91500	2015	MY25B2255	ok	-0.00195566	23310.5	65.0987	0.364438	5.599	0.0470173	0.0730146	0.000861284	1.79726	0.026024	0.178603	0.00149981	0.579943	0.0540291	0.00111769	1013.48	47.8135	48.1133	1059.34	17.7915	20.7418	1044.46	30.2472	32.0374	1063.57	44.0039	47.0069	104.526
91500	2015	MY25B2073	ok	0.00116698	24023.4	65.0743	0.365383	5.59021	0.0487608	0.0756917	0.00104182	1.86609	0.030408	0.178884	0.00156032	0.535288	0.0540187	0.00102765	1086.06	55.1838	55.4822	1060.88	18.507	21.3664	1069.15	34.8435	36.4816	1063.37	40.459	43.7051	97.6814
91500	2015	MY25B2093	ok	0.00120001	24076.9	66.942	0.36304	5.58973	0.0460279	0.0757226	0.000926824	1.86701	0.0275418	0.1789	0.00147313	0.558194	0.0543726	0.00100574	1086.87	49.0669	49.4028	1060.96	17.4727	20.4775	1069.47	31.5533	33.3544	1070.15	39.5896	42.9423	97.6158
91500	2015	MY25B2368	ok	-0.00038956	21523.3	61.8807	0.361227	5.58947	0.0470357	0.0743904	0.000963121	1.83425	0.0283232	0.178908	0.00150552	0.544971	0.0534745	0.000969944	1051.2	52.1796	52.4753	1061.01	17.8568	20.8065	1057.8	32.6677	34.3736	1052.93	38.1971	41.5558	100.933
91500	2015	MY25B2208	ok	-0.000656573	23569.4	66.1116	0.366639	5.58052	0.0442847	0.0742246	0.000893106	1.8331	0.0264217	0.179195	0.00142202	0.55056	0.0534907	0.00103718	1046.7	48.5273	48.8424	1062.57	16.8643	19.9696	1057.39	30.4818	32.302	1053.24	40.8446	44.0035	101.516
91500	2015	MY25B2032	ok	-0.000408068	21749.2	60.8111	0.358978	5.57596	0.0483691	0.0744629	0.000964116	1.84049	0.0286838	0.179341	0.00155571	0.556602	0.0536388	0.0011029	1053.16	52.1673	52.4641	1063.38	18.4487	21.3285	1060.03	33.041	34.7356	1056.08	43.4293	46.4283	100.97
91500	2015	MY25B2162	ok	-0.00111238	23450.3	63.9353	0.367332	5.57065	0.044521	0.0739065	0.000987142	1.82848	0.0284604	0.179512	0.00143468	0.51346	0.052835	0.00105523	1038.04	53.9381	54.217	1064.31	17.0121	20.1039	1055.73	32.8652	34.5549	1040.66	41.5683	44.6048	102.531
91500	2015	MY25B2185	ok	-3.49118e-05	24718.3	65.5453	0.368666	5.56828	0.0495749	0.0748264	0.000951624	1.85202	0.0287515	0.179589	0.0015989	0.573491	0.0533055	0.00112446	1062.97	51.1658	51.474	1064.73	18.9587	21.7779	1064.15	33.0405	34.748	1049.69	44.2855	47.1956	100.166
91500	2015	MY25B2388	ok	-0.000288798	30018.9	85.0013	0.356119	5.5632	0.0431472	0.0746466	0.000837558	1.84926	0.0252238	0.179753	0.00139413	0.568611	0.0555916	0.000927073	1058.13	45.1741	45.5197	1065.62	16.5296	19.7044	1063.17	29.003	30.9307	1093.51	36.4718	40.2381	100.709
91500	2015	MY25B2277	ok	-0.000974237	25118.2	65.0406	0.362307	5.56315	0.0488741	0.0740716	0.00117264	1.83503	0.033224	0.179754	0.0015792	0.485231	0.0540001	0.00106617	1042.54	63.8875	64.1252	1065.63	18.7238	21.5783	1058.08	38.3141	39.7794	1063.01	41.976	45.1111	102.215
91500	2015	MY25B2117	ok	0.000403927	22796.9	62.1146	0.36354	5.55517	0.0442353	0.075281	0.00117298	1.86767	0.0326809	0.180012	0.00143342	0.455069	0.0534949	0.00104414	1075.14	62.5726	62.8307	1067.04	16.9935	20.1028	1069.71	37.4359	38.9667	1053.32	41.1186	44.2584	99.2469
91500	2015	MY25B2058	ok	2.55346e-05	22712.7	62.9595	0.362485	5.55269	0.0432971	0.0749797	0.000967037	1.86103	0.028048	0.180093	0.00140428	0.517377	0.0548022	0.00108013	1067.08	51.8562	52.1627	1067.48	16.6474	19.8135	1067.35	32.1726	33.934	1078.39	42.5093	45.6948	100.037
91500	2015	MY25B2139	ok	-0.000209567	23496.3	64.0925	0.366646	5.55176	0.0422042	0.0747885	0.000917214	1.85659	0.0267889	0.180123	0.00136929	0.52685	0.0530171	0.000984792	1061.95	49.3482	49.6671	1067.65	16.2324	19.467	1065.78	30.7563	32.5891	1044.15	38.7903	42.0488	100.537
91500	2015	MY25B2345	ok	-1.01215e-05	23668	61.685	0.358117	5.55091	0.0530174	0.0749616	0.00119582	1.86117	0.034605	0.180151	0.00172064	0.51369	0.0554472	0.00134212	1066.6	64.1447	64.3925	1067.8	20.3973	23.0555	1067.4	39.6927	41.1335	1090.74	52.8038	55.459	100.113
91500	2015	MY25B2054	ok	-0.000166513	22914.4	64.7068	0.365051	5.54497	0.0425765	0.0748695	0.000909383	1.86088	0.0267403	0.180343	0.00138475	0.534346	0.0553242	0.00107905	1064.13	48.8579	49.1813	1068.85	16.4141	19.6254	1067.3	30.6735	32.5161	1088.39	42.4562	45.7028	100.444
91500	2015	MY25B2385	ok	0.00202779	31543.2	85.5841	0.357566	5.63688	0.0450134	0.0761132	0.000884961	1.86095	0.0262488	0.177403	0.00141666	0.566145	0.0547915	0.0010598	1097.18	46.5387	46.8994	1052.77	16.8139	19.8742	1067.32	30.1093	31.9845	1078.18	41.7094	44.9505	95.9527
91500	2015	MY25B2232	ok	-0.000507806	22853.1	63.422	0.363404	5.59132	0.0462229	0.0742792	0.000967432	1.8309	0.0282442	0.178849	0.00147852	0.535894	0.0552689	0.00102723	1048.18	52.5155	52.8076	1060.68	17.5371	20.531	1056.6	32.5991	34.3047	1087.33	40.4183	43.8098	101.192
91500	2014	MA13A183	ok	-0.000206623	8710.18	86.3061	0.368676	5.64686	0.0912615	0.0741757	0.00172128	1.81037	0.0511949	0.17709	0.00286203	0.571506	0.0526908	0.00139196	1045.38	93.6069	93.7702	1051.06	33.9732	35.5822	1049.21	59.3407	60.2813	1037.89	54.837	57.1609	100.543	1.00187
91500	2014	MA13A024	ok	-0.000147376	6698.1	68.3688	0.339384	5.63982	0.0981915	0.0742701	0.00184257	1.81493	0.0550082	0.177311	0.00308705	0.574437	0.0529515	0.00137496	1047.94	100.037	100.191	1052.27	36.6407	38.1407	1050.86	63.7002	64.5801	1042.89	54.1604	56.5344	100.413	1.00436
91500	2014	MA13A076	ok	0.00256482	7904.98	80.5323	0.353281	5.62419	0.0921417	0.0766449	0.00182106	1.87817	0.0542049	0.177803	0.00291297	0.567666	0.0525905	0.00129848	1111.1	94.9057	95.0876	1054.96	34.5672	36.1612	1073.42	61.9587	62.9019	1035.96	51.1567	53.6313	94.948	1.00259
91500	2014	MA13A002	ok	0.000397543	10519.3	96.9972	0.350638	5.63242	0.0929293	0.0747743	0.00180805	1.82966	0.0535592	0.177544	0.00292929	0.563629	0.0549532	0.00140479	1061.56	97.3015	97.4635	1053.54	34.7648	36.346	1056.16	61.8333	62.7484	1081.28	55.2825	57.781	99.2442	1.02398
91500	2014	MA13A207	ok	0.00065594	8926.44	89.3237	0.364853	5.61683	0.0908634	0.0750909	0.00160994	1.8425	0.0494865	0.178037	0.0028801	0.60231	0.0547434	0.00125888	1070.06	86.165	86.3509	1056.24	34.1736	35.789	1060.76	56.9801	57.9805	1077.26	49.5453	52.2985	98.7084	0.991737
91500	2014	MA13A059	ok	0.00249283	7912.72	80.6264	0.340633	5.57711	0.0907958	0.0768899	0.00180952	1.90008	0.0543731	0.179304	0.00291909	0.568911	0.0544248	0.00138344	1117.47	93.9155	94.1014	1063.17	34.6171	36.2333	1081.12	61.8749	62.8329	1071.16	54.4561	56.9446	95.1413	0.974635
91500	2014	MA13A112	ok	0.00176582	8224.77	82.5786	0.364745	5.58092	0.0944871	0.0762549	0.00179744	1.8831	0.0546506	0.179182	0.00303362	0.583373	0.0535836	0.00134529	1100.9	94.2964	94.4762	1062.5	35.9772	37.533	1075.16	62.4054	63.3449	1055.02	52.9756	55.4558	96.5124
91500	2014	MA13A229	ok	-0.00169367	10053	102.399	0.361646	5.57551	0.0877394	0.0733869	0.00163666	1.81404	0.0495138	0.179356	0.00282244	0.57654	0.0525513	0.0012089	1023.77	90.2557	90.4181	1063.45	33.4702	35.1401	1050.54	57.3484	58.3236	1035.21	47.6283	50.2731	103.876	1.00333
91500	2014	MA13A169	ok	7.94739e-05	8097.97	79.6587	0.362959	5.5732	0.0928792	0.0748901	0.00195873	1.85196	0.0574348	0.17943	0.00299027	0.537368	0.0550022	0.00140581	1064.68	105.198	105.349	1063.86	35.4592	37.0407	1064.13	66.0035	66.8745	1082.22	55.3213	57.8224	99.9232	1.00336
91500	2014	MA13A095	ok	-0.0003269	8067.98	80.5455	0.360624	5.57053	0.0923536	0.0745665	0.00186324	1.84484	0.0553219	0.179516	0.00297619	0.552865	0.0538077	0.00130665	1055.96	100.635	100.79	1064.33	35.291	36.881	1061.59	63.6686	64.5668	1059.32	51.4484	54.0191	100.792	0.982909
91500	2014	MA13A006	ok	0.00035901	10542.4	105.174	0.352284	5.56839	0.0850669	0.0751563	0.00190467	1.86015	0.055044	0.179585	0.00274348	0.516261	0.0544532	0.00116937	1071.81	101.824	101.981	1064.71	32.5306	34.2502	1067.04	63.1499	64.0647	1071.7	46.0289	48.9506	99.3375	1.0263
91500	2014	MA13A226	ok	-0.00206586	8937.84	90.8997	0.348459	5.57025	0.091109	0.0731089	0.00166701	1.80887	0.0507597	0.179525	0.00293638	0.582875	0.0536611	0.00123711	1016.09	92.3867	92.543	1064.38	34.8188	36.4296	1048.67	58.8546	59.8018	1056.51	48.714	51.4076	104.753	0.981604
91500	2014	MA13A022	ok	0.000651724	9840.08	95.5917	0.3534	5.54034	0.090903	0.0755873	0.0016821	1.88029	0.051987	0.180494	0.00296146	0.593433	0.0529839	0.00128317	1083.29	89.2588	89.4427	1069.68	35.1013	36.7154	1074.16	59.3978	60.3824	1043.52	50.5441	53.083	98.7434	1.01005
91500	2014	MA13A079	ok	-0.00142275	8349.21	84.1802	0.362886	5.53533	0.092661	0.0738789	0.00179309	1.83945	0.0542339	0.180658	0.00302419	0.567769	0.0516526	0.00124689	1037.28	98.0234	98.1769	1070.57	35.8424	37.427	1059.67	62.4857	63.3974	1017.94	49.1462	51.6306	103.209	1.00641
91500	2014	MA13A184	ok	0.000157491	8959.55	88.3901	0.368702	5.52616	0.0861655	0.0752668	0.00172646	1.87712	0.0520631	0.180957	0.00282154	0.562176	0.0550647	0.0012053	1074.76	92.1201	92.2955	1072.2	33.4362	35.1346	1073.05	59.5232	60.5037	1083.42	47.4295	50.3305	99.7619	0.992695
91500	2014	MA13A153	ok	-4.92359e-05	8253.41	79.6168	0.355035	5.62029	0.0923649	0.074477	0.0018012	1.82631	0.0534015	0.177927	0.00292408	0.562044	0.0538052	0.0016355	1053.55	97.437	97.5963	1055.64	34.6971	36.2875	1054.96	61.6939	62.6091	1059.27	64.397	66.4686	100.199
91500	2014	MA13A167	ok	0.00150913	7418.39	80.044	0.363279	5.52986	0.11502	0.076377	0.0024306	1.90353	0.0723689	0.180836	0.00376136	0.547102	0.0503705	0.00160636	1104.1	127.249	127.383	1071.54	44.5758	45.8619	1082.33	82.2961	83.0204	993.289	63.3535	65.2078	97.0513	0.987137
91500	2014	MA13A001	ok	-6.82172e-05	10790.1	103.343	0.357401	5.59602	0.0883146	0.0746176	0.00143654	1.8377	0.0457474	0.178699	0.00282017	0.63396	0.0540065	0.00121163	1057.34	77.5198	77.7214	1059.86	33.4528	35.1125	1059.04	52.727	53.8031	1063.14	47.7027	50.484	100.238	1.00945
91500	2014	MA13A041	ok	-0.00182085	6966.43	70.4684	0.354808	5.58987	0.0928385	0.0731867	0.00196258	1.80444	0.0569168	0.178895	0.00297115	0.526537	0.0544819	0.00166493	1018.25	108.616	108.75	1060.94	35.2408	36.8231	1047.07	66.0545	66.8973	1072.25	65.5346	67.6208	104.192	0.997592
91500	2014	MA13A127	ok	0.000435342	8639.14	82.1769	0.365812	5.57976	0.113294	0.0751459	0.00236411	1.8561	0.0694991	0.179219	0.00363896	0.54227	0.0541621	0.00196825	1071.53	126.408	126.535	1062.71	43.1555	44.4613	1065.6	79.7999	80.5238	1066.12	77.4855	79.2377	99.1765
AusZ-2	2015	AP29A360	ok	-0.00231484	2354.41	251.461	0.427955	166.073	3.65853	0.0449601	0.00256115	0.0373113	0.00227883	0.00602144	0.00013265	0.360691	0.00193701	8.50728e-05	-58.8754	277.727	-277.727	38.7003	1.70511	1.74903	37.1956	4.54353	4.55906	39.1135	3.4357	3.48908	-65.7326	0.976013
AusZ-2	2015	AP29A361	ok	0.00538587	2278.18	245.847	0.426366	168.53	3.7114	0.0510431	0.00272418	0.0417419	0.00240997	0.00593366	0.000130672	0.381435	0.00170749	8.9689e-05	241.774	246.001	246.004	38.1378	1.67975	1.72306	41.5232	4.7947	4.81304	34.4828	3.62254	3.66198	15.7741	1.00031
AusZ-2	2015	AP29A362	ok	0.0054645	2277.56	249.405	0.428975	170.511	3.99556	0.0510966	0.002931	0.0413001	0.0025591	0.00586472	0.000137427	0.378171	0.00185066	0.00010142	244.187	264.285	264.288	37.696	1.76664	1.80693	41.0926	5.09249	5.1094	37.3714	4.09605	4.13703	15.4373	0.997166
AusZ-2	2015	AP29A363	ok	0.00182001	2292.59	251.391	0.431455	172.431	3.48581	0.0482044	0.00257468	0.0385286	0.00220034	0.00579941	0.000117239	0.353981	0.00199603	9.59974e-05	108.285	252.301	252.302	37.2774	1.50717	1.55317	38.3865	4.38445	4.40159	40.3041	3.87678	3.92707	34.4252	0.953391
AusZ-2	2015	AP29A364	ok	0.00459753	2297.74	243.857	0.422724	167.014	3.63249	0.0504261	0.00285588	0.0416116	0.00252448	0.00598753	0.000130226	0.358504	0.00188455	8.78603e-05	213.673	262.386	262.388	38.483	1.67398	1.71821	41.3963	5.02283	5.04024	38.0552	3.54836	3.59733	18.0102	0.951398
AusZ-2	2015	AP29A365	ok	-0.00137152	2339.87	247.611	0.429418	165.642	3.7316	0.0457086	0.00257688	0.0380311	0.0023089	0.00603711	0.000136004	0.371072	0.0016727	7.64649e-05	-18.7824	272.756	-272.756	38.8007	1.74821	1.7913	37.9	4.60187	4.6178	33.7807	3.08847	3.13279	-206.58	0.946968
AusZ-2	2015	AP29A366	ok	-0.00345203	2306.66	244.868	0.430113	166.481	3.48917	0.0440584	0.00262675	0.0364734	0.00230498	0.0060067	0.000125891	0.33164	0.00190863	9.61369e-05	-108.503	293.468	-293.468	38.6058	1.61823	1.66423	36.3751	4.59753	4.61222	38.5409	3.88258	3.92852	-35.5806	0.962398
AusZ-2	2015	AU14A049	ok	0.0042603	2662.12	229.366	0.427377	169.374	3.015	0.0501487	0.00203119	0.0408061	0.00180536	0.0059041	0.000105098	0.402347	0.00174836	7.57651e-05	200.879	188.088	188.091	37.9483	1.35102	1.40398	40.6107	3.59344	3.61682	35.3073	3.06009	3.10891	18.8911
AusZ-2	2015	AU14A026	ok	-0.000244587	2567.9	220.646	0.429458	169.173	2.86086	0.0465847	0.00191206	0.0379511	0.00168473	0.00591111	9.99617e-05	0.380942	0.00199198	7.39253e-05	26.9432	196.865	196.865	37.9933	1.285	1.34069	37.8216	3.35796	3.37966	40.2222	2.98542	3.05018	141.012
AusZ-2	2015	AU14A030	ok	0.0039521	2561.88	214.348	0.420016	167.378	2.98846	0.0499137	0.00232969	0.0410993	0.00205385	0.00597451	0.000106672	0.357285	0.00195567	8.28155e-05	189.963	217.178	217.18	38.3996	1.37122	1.42465	40.8967	4.08746	4.10832	39.4898	3.3445	3.40036	20.2143
AusZ-2	2015	AU14A098	ok	-0.000737615	2781.51	233.227	0.42645	167.571	2.81049	0.0462016	0.00186087	0.0379987	0.00165787	0.00596761	0.000100088	0.384415	0.00190115	7.38431e-05	7.10339	193.91	193.91	38.3553	1.28658	1.34325	37.8683	3.30436	3.32647	38.3899	2.98223	3.04135	539.958
AusZ-2	2015	AU14A028	ok	0.00497652	2816.98	236.391	0.437986	166.357	2.93295	0.050729	0.00201625	0.0420269	0.00182734	0.00601117	0.00010598	0.405481	0.00196585	7.61647e-05	227.529	183.675	183.679	38.6345	1.36229	1.4167	41.801	3.63505	3.65953	39.6952	3.0759	3.13717	16.98
AusZ-2	2015	AU14A088	ok	-0.0031856	2875.54	237.941	0.436865	166.355	2.84558	0.0442698	0.00207102	0.0366762	0.00182688	0.00601125	0.000102826	0.343408	0.00181767	7.93599e-05	-96.7345	229.752	-229.752	38.635	1.32174	1.37776	36.5738	3.64355	3.66227	36.7058	3.20517	3.25555	-39.9392
AusZ-2	2015	AU14A054	ok	0.00295795	2823.59	234.859	0.436506	165.797	2.73773	0.0491341	0.00187711	0.0408432	0.00169987	0.00603148	9.95952e-05	0.39675	0.00190053	8.26936e-05	153.217	178.967	178.969	38.7646	1.28021	1.33834	40.6469	3.38341	3.40828	38.3776	3.33967	3.39253	25.3004
AusZ-2	2015	AU14A089	ok	-0.0016236	3479.74	296.847	0.473248	165.807	2.71607	0.0455084	0.00162001	0.0378269	0.00148229	0.0060311	9.87948e-05	0.418027	0.00187592	6.87708e-05	-29.4139	172.578	-172.578	38.7622	1.26992	1.3285	37.7001	2.95465	2.97913	37.881	2.77742	2.83915	-131.782
AusZ-2	2015	AU14A051	ok	-0.00301879	2716.85	229.522	0.430571	165.533	3.04822	0.0444055	0.00205129	0.0369712	0.00183857	0.00604108	0.000111244	0.370293	0.00184465	8.28334e-05	-89.2231	226.538	-226.539	38.8262	1.42993	1.48237	36.8626	3.66633	3.68523	37.2501	3.34541	3.39515	-43.5158
AusZ-2	2015	AU14A029	ok	-0.00286519	2891.07	242.237	0.443028	164.776	2.71377	0.0445305	0.00168058	0.0372456	0.00153366	0.00606883	9.99498e-05	0.399966	0.00204865	8.69774e-05	-82.3346	184.83	-184.831	39.0039	1.28474	1.34338	37.1313	3.0579	3.08086	41.3654	3.51242	3.57079	-47.3725
AusZ-2	2015	AU14A025	ok	0.000495694	2628.27	219.911	0.420892	164.202	2.93469	0.0471929	0.00217482	0.0396104	0.00195786	0.00609004	0.000108843	0.361584	0.00174846	7.44896e-05	57.9625	219.744	219.744	39.1399	1.39904	1.45345	39.4436	3.89923	3.91957	35.3094	3.00857	3.05823	67.5262
AusZ-2	2016	FE24B048	ok	-0.000791509	2480.31	226.998	0.411759	168.806	2.76937	0.0461535	0.00207226	0.0376816	0.00180128	0.00592397	9.71867e-05	0.343195	0.00181795	8.80483e-05	4.5951	216.266	216.266	38.0757	1.24931	1.30677	37.558	3.59075	3.61077	36.7114	3.55607	3.60157	828.615
AusZ-2	2016	FE24B114	ok	-0.00178097	2488.2	220.174	0.413017	168.361	2.72538	0.0453724	0.00193699	0.0371417	0.00169578	0.00593961	9.61486e-05	0.354551	0.00188735	8.78707e-05	-36.6712	207.251	-207.251	38.1759	1.23596	1.29431	37.0296	3.38131	3.40197	38.1115	3.54878	3.59788	-104.103
AusZ-2	2016	FE24B152	ok	0.00182644	2537.97	223.891	0.416055	167.684	2.62628	0.0482302	0.00206925	0.0396406	0.00181051	0.00596361	9.34029e-05	0.342918	0.00191761	8.3816e-05	109.546	202.617	202.618	38.3297	1.20065	1.26111	39.4731	3.60572	3.62773	38.7221	3.38497	3.43807	34.9896
AusZ-2	2016	FE24B153	ok	0.00308308	2523.25	223.63	0.415151	167.407	2.50753	0.0492258	0.00202297	0.0405258	0.00177261	0.00597347	8.94745e-05	0.342446	0.00176092	8.42226e-05	157.583	192.36	192.362	38.3929	1.15015	1.21333	40.3373	3.52873	3.55221	35.5608	3.40166	3.44628	24.3636
AusZ-2	2016	FE24B151	ok	0.000548613	2539.82	224.533	0.411491	167.701	2.69137	0.0472189	0.00221779	0.0388055	0.00192609	0.00596301	9.56983e-05	0.323337	0.00187706	8.57033e-05	59.2726	223.907	223.907	38.3259	1.23016	1.28922	38.6571	3.83745	3.8573	37.9041	3.46126	3.51105	64.6603
AusZ-2	2016	FE24B157	ok	-0.00269683	2653.93	222.458	0.415616	166.455	2.80565	0.0446561	0.0024822	0.0369739	0.0021476	0.00600762	0.00010126	0.290187	0.00180212	0.000102557	-75.4414	271.864	-271.864	38.6117	1.30162	1.3584	36.8653	4.28258	4.29877	36.3921	4.14206	4.18051	-51.1811
AusZ-2	2016	FE24B091	ok	0.00342741	2568.73	221.345	0.410394	165.297	2.9251	0.0495079	0.0021834	0.0412783	0.00196154	0.00604972	0.000107056	0.372393	0.00185681	8.20605e-05	170.941	205.925	205.927	38.8815	1.3761	1.43066	41.0714	3.90341	3.92543	37.4955	3.31417	3.36503	22.7456
AusZ-5	2015	AP29A351	ok	-0.00365366	2395.82	254.357	0.736657	169.445	3.32458	0.0438858	0.00273915	0.0356949	0.0023354	0.00590161	0.000115792	0.299883	0.00183915	7.07446e-05	-118.173	307.807	-307.808	37.9324	1.4885	1.53668	35.6122	4.65998	4.67386	37.1392	2.85718	2.91492	-32.0991	0.968947
AusZ-5	2015	AP29A352	ok	0.00513057	2372.2	254.69	0.739007	170.766	3.56472	0.0508312	0.0027482	0.0410243	0.00237758	0.00585597	0.000122243	0.360189	0.00180596	6.84958e-05	232.18	249.639	249.642	37.6399	1.57146	1.61648	40.8236	4.73189	4.74985	36.4696	2.76641	2.82389	16.2115	0.97718
AusZ-5	2015	AP29A353	ok	0.00136005	2382.51	253.015	0.740443	169.429	3.67017	0.0478534	0.00239615	0.0389258	0.0021237	0.00590219	0.000127854	0.39705	0.00187879	7.27637e-05	90.9939	237.293	237.293	37.9361	1.64355	1.68732	38.7748	4.23091	4.24904	37.9389	2.93867	2.99726	41.6908	0.974763
AusZ-5	2015	AP29A354	ok	-7.19344e-05	2367.5	250.667	0.72214	168.339	3.46095	0.046725	0.00264317	0.0382541	0.00230247	0.00594041	0.000122132	0.341582	0.00185775	7.04006e-05	34.1499	270.952	270.953	38.181	1.56996	1.61631	38.118	4.58856	4.60472	37.5144	2.84327	2.90245	111.804	0.975114
AusZ-5	2015	AP29A355	ok	0.0020772	2360.37	251.021	0.725892	168.432	3.67501	0.0484252	0.00240736	0.039624	0.0021512	0.0059371	0.000129541	0.401894	0.00190507	7.10192e-05	119.07	234.359	234.359	38.1598	1.66521	1.70893	39.4569	4.28425	4.30278	38.4691	2.86818	2.92985	32.0482	0.972127
AusZ-5	2015	AP29A356	ok	-0.00371204	2390.33	254.614	0.734229	165.467	3.39687	0.0438572	0.00242593	0.0365293	0.00215527	0.00604351	0.000124067	0.347943	0.001822	6.51285e-05	-119.779	272.872	-272.873	38.8417	1.59476	1.64198	36.4299	4.2988	4.31454	36.7932	2.63039	2.69184	-32.4277	0.965531
AusZ-5	2015	AP29A357	ok	0.0032689	2412.55	254.207	0.734881	168.581	3.40172	0.0493676	0.00244009	0.0403594	0.00215467	0.00593185	0.000119696	0.377966	0.00186278	6.49243e-05	164.31	231.07	231.072	38.1262	1.53866	1.58579	40.1749	4.28964	4.30883	37.6158	2.62209	2.68649	23.2037	0.968779
AusZ-5	2015	AU14A080	ok	0.00117237	2862.33	245.072	0.755009	170.23	2.67048	0.0477013	0.00181476	0.0386194	0.00158925	0.00587439	9.21541e-05	0.381211	0.001874	5.55412e-05	83.4497	180.544	180.545	37.7579	1.18465	1.24412	38.4752	3.16664	3.19044	37.8423	2.24312	2.31897	45.2463
AusZ-5	2015	AU14A076	ok	-0.00148896	2861.79	245.279	0.749912	169.35	2.57708	0.0455992	0.00187347	0.0371095	0.00162588	0.00590494	8.98584e-05	0.347327	0.00188149	6.48698e-05	-24.5846	198.998	-198.998	37.9537	1.15512	1.21665	36.998	3.242	3.26351	37.9933	2.61986	2.6856	-154.38
AusZ-5	2015	AU14A077	ok	0.000327542	2886.17	245.268	0.753577	168.589	2.53622	0.04704	0.00169912	0.0384547	0.00150467	0.00593158	8.92334e-05	0.384472	0.00184877	6.07925e-05	50.2177	172.489	172.489	38.1245	1.14707	1.20955	38.3142	2.99835	3.02327	37.3332	2.45524	2.52288	75.9184
AusZ-5	2015	AU14A037	ok	0.00266364	2911.22	245.687	0.743361	168.089	3.06225	0.0488909	0.00197842	0.0400868	0.00177897	0.00594924	0.000108383	0.41052	0.00191146	6.2636e-05	141.579	189.973	189.975	38.2376	1.39323	1.44541	39.9088	3.54214	3.56504	38.5979	2.52961	2.59978	27.008
AusZ-5	2015	AU14A078	ok	-0.00224102	2932.14	245.423	0.747931	168.53	3.05772	0.0450076	0.00182934	0.0368063	0.00163828	0.00593367	0.000107658	0.407621	0.00183633	5.56159e-05	-56.3032	198.064	-198.064	38.1379	1.38391	1.43616	36.7011	3.26719	3.2882	37.0823	2.24618	2.31896	-67.7366
AusZ-5	2015	AU14A087	ok	0.00146884	3678.53	312.072	0.925402	167.185	2.5592	0.0479494	0.00195684	0.0395274	0.00172288	0.0059814	9.1561e-05	0.351197	0.00188372	4.87619e-05	95.7426	193.228	193.229	38.4437	1.17696	1.23894	39.3625	3.43139	3.45438	38.0383	1.96932	2.05616	40.1532
AusZ-5	2015	AU14A079	ok	-0.0025902	2973.21	242.451	0.761678	166.904	2.65299	0.0447385	0.00183642	0.0369425	0.00162614	0.00599146	9.5236e-05	0.361108	0.00195116	5.86465e-05	-70.9367	200.59	-200.59	38.5082	1.2242	1.28409	36.8345	3.24277	3.26408	39.3989	2.36844	2.44634	-54.2853
AusZ-5	2015	AU14A085	ok	-0.000916978	2932.22	245.576	0.757771	165.399	2.69573	0.0460694	0.00184646	0.0383878	0.00166093	0.00604599	9.85399e-05	0.376692	0.00181809	5.41735e-05	0.20431	193.213	193.213	38.8576	1.26663	1.32564	38.2487	3.30983	3.33234	36.7144	2.18795	2.26115	19018.9
AusZ-5	2015	AU14A099	ok	-0.00503023	2682.77	218.962	0.662239	165.333	2.99894	0.0428146	0.00197386	0.0356899	0.00176817	0.00604841	0.000109711	0.366126	0.00185425	7.49532e-05	-179.469	230.096	-230.098	38.8731	1.41022	1.4635	35.6072	3.52815	3.54646	37.4439	3.02714	3.08258	-21.6601
AusZ-5	2015	AU14A086	ok	0.00472973	2603.06	219.419	0.675289	163.924	2.83453	0.050545	0.00208592	0.042496	0.00190148	0.00610039	0.000105486	0.386452	0.00188096	6.72865e-05	219.127	191.005	191.008	39.2062	1.35588	1.41214	42.2581	3.78166	3.80571	37.9827	2.71746	2.78086	17.892
AusZ-5	2015	AU14A075	ok	-0.000484195	2991.07	242.349	0.741416	164.375	3.0005	0.0464166	0.00230169	0.0389179	0.00205645	0.00608364	0.000111051	0.345453	0.00195481	7.31216e-05	18.271	238.228	238.228	39.0988	1.42742	1.48067	38.767	4.09695	4.11565	39.4726	2.95302	3.01608	213.994
AusZ-5	2016	FE24B158	ok	0.00205888	3618.02	328.082	0.929678	171.55	2.37304	0.0483972	0.00167337	0.0388814	0.00144795	0.00582921	8.06349e-05	0.371451	0.00192195	5.28624e-05	117.703	163.04	163.041	37.4684	1.03659	1.10306	38.7313	2.88472	2.91118	38.8096	2.13488	2.21848	31.833
AusZ-5	2016	FE24B161	ok	0.00341066	3648.51	333.571	0.948326	169.478	2.34654	0.0494759	0.00199692	0.0402339	0.0017168	0.00590048	8.16961e-05	0.32448	0.0019649	4.90877e-05	169.427	188.513	188.515	37.9251	1.0502	1.11742	40.0524	3.4181	3.442	39.6761	1.9824	2.07611	22.3844
AusZ-5	2016	FE24B068	ok	-3.92224e-05	3767.27	336.776	0.976547	169.159	2.28311	0.0467472	0.00155155	0.0380867	0.00136463	0.0059116	7.9788e-05	0.376696	0.00186544	5.00602e-05	35.2914	158.94	158.94	37.9965	1.02566	1.09464	37.9543	2.71977	2.74671	37.6696	2.02177	2.10485	107.665
AusZ-5	2016	FE24B135	ok	-0.000427644	3574.57	324.991	0.950165	168.396	3.18649	0.0464432	0.00253171	0.0380105	0.00219331	0.00593839	0.00011237	0.327932	0.001813	5.93629e-05	19.6456	261.818	261.818	38.1681	1.44448	1.49469	37.8797	4.37154	4.38828	36.6115	2.39754	2.46416	194.284
AusZ-5	2016	FE24B160	ok	-0.000433515	3806.15	338.974	0.969775	167.803	2.325	0.0464412	0.0016669	0.0381432	0.00146752	0.00595938	8.25703e-05	0.360126	0.00190205	5.26677e-05	19.5412	172.394	172.394	38.3026	1.06141	1.12925	38.0095	2.92477	2.9499	38.4081	2.12704	2.20924	196.01
AusZ-5	2016	FE24B159	ok	9.84633e-05	3694.34	323.529	0.937311	167.043	2.23057	0.0468656	0.00183295	0.0386669	0.00159801	0.0059865	7.99397e-05	0.323109	0.00184547	4.55172e-05	41.3417	187.079	187.079	38.4764	1.02758	1.09813	38.5216	3.18401	3.20774	37.2667	1.83831	1.92742	93.0693
AusZ-5	2016	FE24B005	ok	0.00114369	3681.48	330.837	0.932173	163.451	2.30615	0.0477093	0.00176468	0.0402279	0.00159253	0.00611804	8.63202e-05	0.356402	0.00185564	4.77194e-05	83.8432	175.519	175.52	39.3192	1.10952	1.17799	40.0465	3.1707	3.19644	37.4718	1.92724	2.01334	46.8961
FC-1	2015	AU14A045	ok	0.000416446	41216.3	109.181	0.386532	5.53272	0.0567607	0.0754404	0.000646363	1.87922	0.0251181	0.180743	0.00185426	0.767536	0.0542	0.000919047	1079.39	34.3854	34.8565	1071.03	21.9756	24.4772	1073.79	28.705	30.6892	1066.85	36.1801	39.7995	99.2259
FC-1	2015	AU14A071	ok	-2.79077e-05	135194	361.396	0.510065	5.44869	0.0512693	0.0756382	0.00040645	1.9132	0.020731	0.18353	0.00172692	0.868371	0.055341	0.000728046	1084.64	21.549	22.3002	1086.23	20.4417	23.1817	1085.7	23.5288	25.9631	1088.71	28.6454	33.2707	100.147
FC-1	2015	AU14A102	Pb loss in 2nd half	0.00154184	225929	564.545	0.679975	5.4263	0.0592255	0.0771135	0.000710324	1.95857	0.0279724	0.184288	0.00201141	0.764213	0.0531481	0.00089694	1123.26	36.728	37.2058	1090.36	23.8014	26.2097	1101.39	31.4603	33.3727	1046.67	35.3276	38.8938	97.0708
FC-1	2015	AU14A084	ok	0.00101414	120965	321.788	0.507515	5.41003	0.0510118	0.0767843	0.000373132	1.95607	0.0207494	0.184842	0.0017429	0.888895	0.0549155	0.000726681	1114.73	19.4003	20.2772	1093.37	20.6191	23.372	1100.54	23.3482	25.8638	1080.56	28.5974	33.1651	98.0844
FC-1	2015	AU14A044	ok	0.000525002	193642	507.283	0.640789	5.37795	0.0501664	0.0766011	0.000365585	1.96305	0.0205691	0.185945	0.00173452	0.890247	0.0553231	0.000708092	1109.95	19.0669	19.9509	1099.37	20.5102	23.3046	1102.93	23.1133	25.6624	1088.37	27.8605	32.5946	99.0463
FC-1	2015	AU14A065	ok	0.000593874	96903.8	282.31	0.552258	5.3609	0.0519625	0.0767815	0.000546303	1.97393	0.0237344	0.186536	0.00180807	0.80613	0.056041	0.000783189	1114.65	28.4054	29.0112	1102.58	21.3744	24.0836	1106.65	26.6126	28.8687	1102.11	30.8047	35.2478	98.9171
FC-1	2015	AU14A103	ok	-0.000581898	137575	369.667	0.696856	5.31281	0.0519618	0.0761431	0.000372339	1.97523	0.0215988	0.188224	0.00184092	0.894436	0.0570498	0.00077798	1097.96	19.5707	20.4148	1111.75	21.7469	24.4569	1107.09	24.2117	26.6736	1121.41	30.5851	35.2036	101.256
FC-1	2015	AU14A033	ok	-0.000706112	89446.6	246.538	0.644729	5.30778	0.0532344	0.0760757	0.000472134	1.97536	0.0232981	0.188403	0.00188959	0.850365	0.0555926	0.000751408	1096.19	24.8447	25.5127	1112.72	22.32	24.9722	1107.14	26.1159	28.4135	1093.53	29.561	34.0995	101.508
FC-1	2015	AU14A034	ok	0.000840672	148424	410.183	0.632553	5.30216	0.0499978	0.077419	0.000397189	2.01236	0.0216027	0.188602	0.00177846	0.878408	0.0565416	0.000721245	1131.14	20.4322	21.2908	1113.8	21.0056	23.8098	1119.69	24.0397	26.5715	1111.69	28.3615	33.2111	98.4672
FC1	2015	MA13A277	ok	0.000960432	49276.1	142.501	0.427702	5.45267	0.0521977	0.0764412	0.00102183	1.93211	0.0317673	0.183396	0.00175563	0.582228	0.0515421	0.00114974	1105.78	53.4377	53.7571	1085.5	20.7828	23.4796	1092.27	35.9177	37.5769	1015.82	45.3195	47.9915	98.1663		1 concentration uncertainty c.10%
FC1	2015	MA13A316	ok	0.000272949	82958.5	257.228	0.628619	5.42106	0.0526706	0.0760837	0.000996064	1.93428	0.0315348	0.184466	0.00179226	0.595955	0.0573497	0.000888135	1096.4	52.4078	52.7279	1091.33	21.2065	23.8824	1093.02	35.6393	37.3131	1127.14	34.9106	39.0604	99.537		2 data not corrected for common-Pb
FC1	2015	MA13A205	ok	4.26252e-05	146170	440.276	0.698169	5.42196	0.0396929	0.0758838	0.000413859	1.92888	0.0176087	0.184435	0.00135021	0.801927	0.056949	0.000695611	1091.13	21.8496	22.5995	1091.16	15.9763	19.3871	1091.15	19.9222	22.7725	1119.48	27.3482	32.4149	100.002		3 data not corrected for common-Pb
FC1	2015	MA13A230	ok	0.000456121	126348	399.545	0.697019	5.39493	0.0470962	0.0764221	0.000643299	1.9523	0.0236756	0.185359	0.00161813	0.719854	0.0559887	0.000818832	1105.28	33.6528	34.1572	1096.19	19.1388	22.0913	1099.24	26.661	28.8845	1101.11	32.2074	36.4727	99.1773		4 Concordance calculated as (206Pb-238U age/207Pb-206Pb age)*100
FC1	2015	MA13A278	ok	-0.000148792	154448	475.577	0.513693	5.37264	0.0445301	0.0760724	0.000590679	1.95142	0.0221628	0.186128	0.00154269	0.729783	0.0575168	0.000823551	1096.11	31.0845	31.6209	1100.37	18.2404	21.3394	1098.94	24.9617	27.3226	1130.34	32.3694	36.8304	100.389		Decay constants and errors of Jaffey et al 1971 used, except for 232Th which are taken from Amelin and Zaitsev
FC1	2015	MA13A314	ok	-0.000194682	38612.1	120.698	0.365206	5.3586	0.0506427	0.0761349	0.0012071	1.95814	0.0361429	0.186616	0.00176366	0.51202	0.0562298	0.00131558	1097.75	63.4558	63.7211	1103.02	20.8486	23.6203	1101.25	40.653	42.15	1105.73	51.7404	54.5204	100.48		Uncertainties quoted according to Horstwood et al. 2016 and for systematic errors include decay constant errors, uncertanty in primary standard composition, long term variability in secondary standards, and uncertanty from random sources
FC1	2015	MA13A315	ok	-0.000936818	145402	451.976	0.638175	5.33337	0.0431745	0.0756936	0.000641419	1.956	0.0229227	0.187499	0.00151783	0.690764	0.057111	0.000754255	1086.11	33.9742	34.4568	1107.81	17.9358	21.1192	1100.51	25.7941	28.0914	1122.58	29.6515	34.4048	101.998		f206c = the proportion of the 206Pb ion beam that is common, calculated as (207Pb206Pb measured - 207Pb206Pb ideal)/(207Pb206Pb model - 207Pb206Pb ideal)* 100
																																	where 207Pb206Pb model = (Stacey and Kramers, 1975) 207Pb/206Pb ratio at the apparent (non-common Pb corrected) 206Pb/238U age
GJ1	2015	AP29A248	ok	-0.000134578	54729.3	355.449	0.0341376	10.2762	0.118811	0.0597509	0.000665619	0.80135	0.0128659	0.0973118	0.0011251	0.720122	0.0303987	0.00125997	593.622	48.2893	48.3913	598.636	13.8426	15.097	597.59	19.1889	20.1175	605.271	50.1749	51.0494	100.845		where 207Pb206Pb ideal = 207Pb206Pb ratio at (non-common Pb corrected) 206Pb/238U age
GJ1	2015	AP29A373	ok	-0.000306087	55811.9	356.594	0.0337075	10.2591	0.119454	0.0596372	0.00053908	0.801164	0.0118097	0.0974748	0.00113498	0.789909	0.0288465	0.00111033	589.492	39.2109	39.3348	599.593	13.9631	15.2114	597.485	17.6147	18.6216	574.8	44.2492	45.1422	101.714		204Pb correction not applied due to Hg background.
GJ1	2015	AP29A285	ok	0.000139722	58292.4	356.525	0.0339808	10.2433	0.120174	0.0600259	0.00073801	0.807625	0.0137249	0.0976245	0.00114533	0.690351	0.0313775	0.00146258	603.565	53.207	53.3028	600.473	14.0894	15.331	601.121	20.4311	21.3158	624.462	58.2153	59.019	99.4877		NA = Not Available
GJ1	2015	AP29A342	ok	0.000234778	54727.9	349.187	0.0335669	10.2357	0.123849	0.0601154	0.00057787	0.809434	0.0125085	0.0976975	0.00118212	0.782984	0.0297678	0.00136603	606.79	41.5772	41.701	600.901	14.5415	15.7492	602.137	18.6101	19.5805	592.892	54.415	55.1899	99.0295
GJ1	2015	AP29A092	ok	-0.000588543	55962.7	359.518	0.0339968	10.2184	0.120519	0.0594693	0.000605695	0.80209	0.0124992	0.0978628	0.00115423	0.756856	0.0280777	0.00116039	583.376	44.226	44.3336	601.872	14.1974	15.4358	598.007	18.6379	19.5939	559.692	46.2618	47.0727	103.171
GJ1	2015	AP29A006	ok	-8.11218e-05	56054.5	362.13	0.0335062	10.207	0.117487	0.0599018	0.000588317	0.808824	0.0122384	0.0979719	0.0011277	0.760716	0.0297648	0.00116752	599.088	42.5346	42.6525	602.513	13.8704	15.1381	601.794	18.2116	19.201	592.834	46.5077	47.4118	100.572
GJ1	2015	AU14A011	ok	7.91539e-05	68713.6	348.593	0.0352575	10.1457	0.0971532	0.0601293	0.000533485	0.816804	0.0106628	0.0985643	0.000943835	0.733539	0.029993	0.000994839	607.29	38.3717	38.506	605.99	11.6057	13.1108	606.264	15.8287	16.974	597.313	39.6245	40.6977	99.7859
GJ1	2015	AU14A038	ok	-0.00106029	72054.6	350.411	0.0351499	10.1195	0.097762	0.0592391	0.000508464	0.80679	0.0104261	0.0988188	0.000954662	0.747565	0.0307943	0.00114211	574.949	37.3238	37.4475	607.483	11.7375	13.2345	600.652	15.5243	16.6698	613.03	45.4724	46.4601	105.659
GJ1	2015	AU14A039	ok	-0.0011163	71866.1	350.65	0.0351715	10.1162	0.100034	0.0591986	0.000486102	0.806502	0.0103662	0.0988512	0.000977484	0.76933	0.030123	0.00107824	573.461	35.7156	35.8443	607.673	12.0179	13.4847	600.49	15.4366	16.5874	599.862	42.9438	43.9444	105.966
GJ1	2015	AU14A059	ok	-0.000736403	74192.6	351.249	0.0351202	10.1141	0.101787	0.0595126	0.000543226	0.810947	0.0110181	0.0988716	0.000995024	0.740709	0.0313355	0.00111238	584.953	39.6254	39.7461	607.793	12.2334	13.6777	602.985	16.3852	17.4825	623.639	44.2773	45.326	103.904
GJ1	2015	AU14A036	ok	0.00065401	70275.9	343.618	0.0353937	10.1051	0.0976647	0.0606639	0.000538125	0.827374	0.010854	0.0989599	0.000956437	0.736732	0.0317155	0.00100535	626.399	38.2421	38.3854	608.311	11.7585	13.2571	612.154	16.0612	17.2123	631.085	40.0095	41.1945	97.1124
GJ1	2015	AU14A007	ok	0.00027566	69676.7	357.433	0.0351235	10.1088	0.0974239	0.0603486	0.000463996	0.822771	0.0101437	0.0989236	0.000953378	0.781715	0.0302123	0.000973528	615.155	33.2086	33.3677	608.097	11.7211	13.2229	609.593	15.031	16.2453	601.615	38.7716	39.8834	98.8527
GJ1	2015	AU14A060	ok	0.000451447	73369.1	347.499	0.0346373	10.0748	0.0976306	0.0605469	0.00051041	0.828262	0.0106383	0.0992576	0.000961864	0.754474	0.0309321	0.00110392	622.236	36.3678	36.5166	610.057	11.8236	13.3229	612.647	15.7379	16.9128	615.732	43.9492	44.9793	98.0427
GJ1	2015	AU14A058	ok	-0.000140159	71864.9	344.825	0.0359928	10.0495	0.100085	0.0601039	0.00046074	0.824274	0.0103593	0.0995077	0.000991015	0.792439	0.0289204	0.000969453	606.376	33.1585	33.3133	611.523	12.1805	13.6473	610.43	15.3435	16.5381	576.253	38.6336	39.6584	100.849
GJ1	2016	JN09A005	ok	-0.000968642	24798.4	368.503	0.0331894	10.2694	0.0856712	0.0590798	0.000790281	0.792879	0.0124995	0.0973769	0.000812356	0.529182	0.0270783	0.00147563	569.091	58.2244	58.3022	599.018	9.99449	11.6722	592.804	18.6908	19.6281	540.033	58.8583	59.4539	105.259
GJ1	2016	JN09A028	ok	-0.00136256	25415.5	365.18	0.0336545	10.1354	0.0839882	0.0589667	0.000813876	0.80182	0.0129083	0.0986637	0.000817585	0.514734	0.029463	0.00155897	564.921	60.1201	60.1944	606.573	10.0528	11.7615	597.855	19.2495	20.1761	586.909	62.11	62.7764	107.373
GJ1	2016	JN09A258	ok	-0.0010795	24904.3	365.478	0.0343079	10.1531	0.089768	0.0591702	0.000793752	0.803185	0.0129042	0.0984918	0.000870807	0.550309	0.0304218	0.00155032	572.418	58.3581	58.4366	605.564	10.7081	12.3212	598.624	19.2353	20.1649	605.724	61.7365	62.4503	105.791
GJ1	2016	JN09A286	ok	0.00156672	25209.6	368.562	0.0339571	10.2626	0.0888059	0.0611622	0.000803054	0.821365	0.0129159	0.0974408	0.000843185	0.550292	0.0290443	0.00155535	644.009	56.4388	56.5416	599.393	10.3735	12.0002	608.81	19.147	20.112	578.686	61.9782	62.6276	93.0722
GJ1	2016	JN09A342	ok	6.27159e-05	24249.1	348.976	0.0326844	10.244	0.0880398	0.0599618	0.000792157	0.806706	0.0127141	0.0976177	0.000838949	0.545304	0.0285593	0.00146503	601.254	57.1939	57.2823	600.432	10.3205	11.9597	600.604	18.9316	19.8815	569.158	58.3933	59.0597	99.8633
M257	2015	AP29A307	increasing age w/ deepth	0.000131896	128094	850.203	0.273139	10.9591	0.128928	0.0589921	0.000383452	0.741873	0.00997129	0.0912481	0.00107348	0.875283	0.0281037	0.000402371	565.855	28.3086	28.4665	562.915	13.2447	14.4057	563.498	15.1476	16.1835	560.202	16.0413	18.2523	99.4803	1.07134
M257	2015	AP29A308	increasing age w/ deepth	4.11925e-05	128853	859.443	0.273274	10.958	0.128644	0.0589196	0.000376475	0.741036	0.00990463	0.0912573	0.00107133	0.87833	0.028288	0.000409766	563.177	27.8402	27.9993	562.969	13.2182	14.3815	563.01	15.0503	16.0907	563.825	16.3346	18.5372	99.9631	1.06099
M257	2015	AP29A309	increasing age w/ deepth	-0.000139317	129937	868.156	0.27313	10.9113	0.127119	0.0588347	0.000398422	0.743135	0.010014	0.0916478	0.00106771	0.864555	0.0282247	0.0004291	560.036	29.5214	29.6698	565.275	13.1711	14.3474	564.234	15.2065	16.2412	562.581	17.1059	19.2115	100.935	1.06384
M257	2015	AP29A310	increasing age w/ deepth	0.000434902	127259	843.2	0.272644	10.9548	0.128218	0.0592449	0.000416362	0.745347	0.0101755	0.0912841	0.00106841	0.857323	0.0286582	0.00042474	575.162	30.5589	30.7101	563.127	13.1819	14.3488	565.521	15.4411	16.4655	571.102	16.9285	19.1148	97.9076	1.03636
M257	2015	AP29A311	increasing age w/ deepth	6.34825e-05	125663	846.964	0.272163	10.9492	0.125408	0.0589494	0.000404757	0.742008	0.00990874	0.0913307	0.00104606	0.85769	0.0284609	0.000418376	564.281	29.9109	30.0596	563.402	12.9059	14.0968	563.577	15.052	16.0943	567.224	16.6764	18.8637	99.8441	1.06356
M257	2015	AP29A312	increasing age w/ deepth	-0.00039028	126437	840.22	0.273116	10.9155	0.125651	0.0586245	0.000377485	0.7402	0.00976305	0.0916131	0.00105458	0.872741	0.0283365	0.000412694	552.228	28.1075	28.259	565.07	13.0093	14.1982	562.522	14.8391	15.8915	564.78	16.451	18.6468	102.326	1.05762
M257	2016	AU31A042	ok	0.00057215	143358	872.583	0.27639	10.887	0.12704	0.0594479	0.000425274	0.752562	0.0103005	0.091853	0.00107183	0.852544	0.0280642	0.000438224	582.592	31.0675	31.2201	566.487	13.2207	14.3978	569.71	15.5955	16.6251	559.425	17.4709	19.5153	97.2356
M257	2016	AU31A051	ok	-6.14719e-05	142791	869.489	0.275823	10.7943	0.124335	0.0590572	0.000364427	0.754034	0.0098532	0.0926415	0.0010671	0.881477	0.0285016	0.000397549	568.259	26.8634	27.0312	571.14	13.1574	14.3584	570.562	14.9114	15.9883	568.023	15.8459	18.1397	100.507
M257	2016	AU31A056	ok	0.000204846	143155	881.824	0.278839	10.7797	0.123907	0.0592947	0.000349814	0.758095	0.00979465	0.0927674	0.00106632	0.889662	0.0280448	0.000397007	576.988	25.6452	25.8263	571.883	13.147	14.3519	572.91	14.8041	15.8968	559.045	15.8279	18.0564	99.1152
M257	2016	AU31A059	ok	-0.000804121	143263	867.467	0.277989	10.7708	0.124859	0.0584837	0.000325026	0.748341	0.00962047	0.0928438	0.00107628	0.901729	0.0283553	0.000397955	546.978	24.2813	24.4532	572.334	13.2694	14.4659	567.261	14.5851	15.6721	565.149	15.8632	18.1332	104.636
M257	2016	AU31A048	ok	-0.000201558	157116	872.686	0.273616	10.785	0.147027	0.0589557	0.000659717	0.753383	0.0132874	0.092721	0.00126401	0.772949	0.0272485	0.000534676	564.511	48.7451	48.8366	571.609	15.5849	16.6129	570.185	20.1126	20.9224	543.383	21.3248	22.9366	101.257
						1.6556
Monastery	2015	AP29A317	ok	0.0120662	243.716	11.4575	0.310479	74.8923	3.88727	0.0572947	0.0110312	0.105436	0.0210248	0.0133525	0.00069306	0.260295	0.00451158	0.000933411	501.936	847.679	847.683	85.5062	8.87637	8.91799	101.782	40.5923	40.6053	90.9839	37.6478	37.6743	17.0353	0.944216
Monastery	2015	AP29A318	ok	0.00662848	231.09	11.0064	0.328475	75.7311	4.18332	0.0529608	0.0115682	0.0963812	0.0217153	0.0132046	0.000729412	0.245174	0.00483915	0.00109372	326.128	991.681	991.683	84.5653	9.34264	9.38133	93.4304	42.1008	42.1114	97.5741	44.1063	44.1324	25.9301	0.937641
Monastery	2015	AP29A319	ok	0.00456195	312.47	14.4895	0.313289	73.5731	3.86132	0.0513712	0.00857225	0.0962305	0.0168334	0.0135919	0.000713343	0.300026	0.00356335	0.000790838	256.52	767.108	767.109	87.0291	9.13507	9.17697	93.2909	32.6383	32.6519	71.8952	31.9124	31.9319	33.9268	0.954076
Monastery	2015	AP29A320	ok	0.0058158	322.002	14.6058	0.322699	72.7114	3.51982	0.0523871	0.0104403	0.0992965	0.0203643	0.013753	0.000665756	0.236038	0.00578585	0.000825116	301.35	908.8	908.802	88.0534	8.52499	8.57093	96.1268	39.4284	39.4404	116.608	33.2588	33.3081	29.2197	0.965045
Monastery	2015	AP29A323	ok	0.0140205	227.165	11.3664	0.315209	78.5046	4.65962	0.0587643	0.01484	0.103165	0.0267625	0.0127381	0.000756067	0.228801	0.00559203	0.00106266	557.426	1101.39	1101.39	81.5965	9.68628	9.72104	99.6933	51.7241	51.7339	112.713	42.8379	42.8737	14.6381	0.96664
Monastery	2015	AP29A324	ok	0.00165903	258.843	11.4892	0.313283	70.9526	3.93536	0.0491322	0.0152538	0.0954355	0.0300985	0.0140939	0.000781713	0.175866	0.00401585	0.00108907	153.123	1454.42	1454.42	90.2209	10.0081	10.0492	92.5542	58.3795	58.387	81.0067	43.937	43.955	58.9205	0.952533
Monastery	2015	AP29A325	ok	0.0115884	249.018	11.3048	0.319417	71.5443	3.7871	0.0569977	0.01242	0.109798	0.0246212	0.0139773	0.000739871	0.236057	0.00329288	0.00106258	490.484	961.262	961.265	89.4799	9.47298	9.51569	105.781	47.4406	47.4527	66.4472	42.8838	42.8962	18.2432	0.954929
Monastery	2015	AU14A009	ok	0.0267929	246.29	9.24886	0.206816	72.43	3.81648	0.0690416	0.0111803	0.131373	0.0223717	0.0138064	0.000727488	0.309421	0.00534485	0.00175282	899.086	668.051	668.068	88.3931	9.31522	9.35761	125.33	42.6855	42.7043	107.744	70.668	70.6879	9.83145
Monastery	2015	AU14A027	ok	0.00405378	937.972	35.8706	0.260534	73.0888	1.91749	0.0509796	0.0034917	0.0961297	0.00705062	0.013682	0.000358949	0.357695	0.00379076	0.000409826	238.903	315.869	315.871	87.6018	4.59649	4.68029	93.1974	13.6711	13.7035	76.4748	16.5357	16.5784	36.6684
Monastery	2015	AU14A005	ok	0.00324003	584.454	22.5289	0.221987	72.859	2.30831	0.0503394	0.00521217	0.0952219	0.0103105	0.0137251	0.000434838	0.292594	0.00329228	0.000647827	209.685	480.045	480.047	87.8762	5.56817	5.63798	92.3562	20.0005	20.0223	66.435	26.145	26.1654	41.9087
Monastery	2015	AU14A017	ok	-0.015488	149.37	5.66173	0.225874	72.9845	4.72986	0.0354742	0.0342558	0.0669876	0.0648324	0.0137015	0.000887948	0.0669607	0.00435345	0.00238006	-672.561	5331.53	-5331.54	87.7262	11.3704	11.4047	65.8368	127.437	127.439	87.802	96.0038	96.0135	-13.0436
Monastery	2015	AU14A014	ok	-0.0152553	157.082	5.9146	0.224865	72.7629	3.7343	0.035664	0.0145717	0.0675511	0.027817	0.0137433	0.000705325	0.124629	0.00163358	0.00194103	-657.852	2248.8	-2248.8	87.9916	9.03171	9.07503	66.3729	54.6637	54.6678	32.9913	78.4011	78.4028	-13.3756
Monastery	2015	AU14A022	ok	-0.00552363	161.158	6.03315	0.215534	72.3692	4.23964	0.0433964	0.0140394	0.0826442	0.0271715	0.013818	0.000809508	0.178186	0.00541243	0.00231373	-145.896	1604.08	-1604.08	88.4669	10.3654	10.4036	80.6278	53.0172	53.0235	109.102	93.2792	93.2946	-60.6371
Monastery	2015	AU14A008	ok	0.00425172	503.858	18.9417	0.212931	71.7879	2.53029	0.0511687	0.00594644	0.0982349	0.0119296	0.0139299	0.000490985	0.29024	0.00458319	0.000849432	247.436	535.114	535.115	89.1784	6.2865	6.35025	95.1457	23.109	23.129	92.4248	34.2594	34.2895	36.041
Monastery	2015	AU14A066	ok	0.034982	161.437	5.64593	0.224442	69.4604	4.29674	0.0756222	0.0138089	0.150046	0.0289284	0.0143967	0.000890562	0.32085	0.00479455	0.00206549	1084.21	732.315	732.338	92.1453	11.4	11.4377	141.952	54.7359	54.7548	96.6769	83.2968	83.3103	8.49882
Monastery	2015	AU14A023	ok	-0.0034611	978.592	36.6244	0.260831	71.9284	1.67881	0.045044	0.00360628	0.0863076	0.00719754	0.0139027	0.00032449	0.279877	0.00489211	0.000471829	-54.3328	389.991	-389.991	89.0054	4.15478	4.25027	84.0579	14.0199	14.0456	98.6393	19.0269	19.0886	-163.815
Monastery	2015	AU14A024	ok	-0.00161259	863.328	31.9028	0.243022	71.5628	1.89587	0.0465201	0.0034315	0.0895913	0.00702188	0.0139737	0.000370197	0.338012	0.0050001	0.000558805	23.619	354.017	354.017	89.4569	4.73984	4.8246	87.1226	13.6568	13.6852	100.811	22.5331	22.5875	378.75
Monastery	2015	AU14A013	ok	0.0128147	349.651	12.7115	0.203427	70.5967	3.26695	0.0579957	0.00857699	0.11322	0.0175447	0.014165	0.000655501	0.298631	0.00468035	0.00144015	528.645	648.158	648.164	90.6725	8.39197	8.44145	108.907	33.7526	33.7706	94.3796	58.0814	58.0999	17.1519
Monastery	2015	AU14A015	ok	-0.000892194	153.233	5.51421	0.228091	69.136	4.4877	0.0471547	0.0154549	0.0940011	0.0314072	0.0144642	0.00093889	0.194277	0.00734966	0.00226535	56.031	1563.4	1563.4	92.5746	12.0182	12.0543	91.2237	60.9586	60.9656	148.01	91.2405	91.2695	165.22
Monastery	2016	FE24B187	ok	0.0246342	244.275	10.6059	0.323535	80.2942	4.08105	0.0671459	0.0112376	0.115252	0.0201585	0.0124542	0.000633001	0.290589	0.0033784	0.000917196	841.397	696.728	696.742	79.7891	8.11077	8.15043	110.758	38.745	38.7612	68.17	37.0147	37.0298	9.48294
Monastery	2016	FE24B186	ok	0.00940508	277.023	11.2598	0.334586	75.6542	3.67211	0.0551656	0.00862983	0.100496	0.0164604	0.013218	0.000641579	0.29634	0.00496801	0.000832531	417.967	698.819	698.823	84.6507	8.21758	8.26163	97.2338	31.8523	31.8674	100.166	33.5713	33.6074	20.2529
Monastery	2016	FE24B188	ok	0.0165069	281.365	11.4315	0.313929	74.5588	3.27012	0.0608262	0.00801382	0.112436	0.0156126	0.0134122	0.000588256	0.315859	0.00433036	0.000839438	632.156	567.441	567.451	85.8861	7.53387	7.5833	108.191	30.0464	30.0663	87.3372	33.8606	33.8878	13.5862
Monastery	2016	FE24B183	ok	0.00179109	277.119	11.2901	0.330423	75.3317	3.52091	0.0491316	0.00953839	0.0898867	0.0179492	0.0132746	0.000620439	0.23406	0.00311737	0.000722606	153.096	909.479	909.479	85.0107	7.94659	7.99252	87.3978	34.9043	34.9155	62.9109	29.1655	29.1819	55.5276
Monastery	2016	FE24B185	ok	0.00215719	282.169	11.6751	0.32458	75.0323	3.38447	0.0494289	0.00738582	0.0907914	0.014171	0.0133276	0.000601165	0.288993	0.0043368	0.000849621	167.209	698.18	698.181	85.3477	7.69953	7.7473	88.2404	27.5456	27.5601	87.4669	34.2712	34.2981	51.0426
Monastery	2016	FE24B190	ok	-0.00438689	278.586	11.2083	0.322407	73.8949	3.66288	0.0442624	0.0079035	0.0825529	0.0152981	0.0135327	0.000670801	0.267487	0.00429791	0.000787554	-97.1455	877.002	-877.002	86.6526	8.59053	8.63469	80.5423	29.851	29.8621	86.6841	31.7682	31.7968	-89.1987
Monastery	2016	FE24B189	ok	-0.00477644	276.748	11.1631	0.323989	73.1455	3.7907	0.0439708	0.00865486	0.0828494	0.0168632	0.0136714	0.000708507	0.254614	0.00364657	0.00085184	-113.401	969.793	-969.793	87.5344	9.07279	9.11546	80.8203	32.9004	32.9105	73.5712	34.3725	34.3916	-77.1905
Monastery	2016	FE24B181	ok	0.0136776	279.764	10.9725	0.3269	71.9586	3.86521	0.0586451	0.00859252	0.112321	0.017528	0.0138969	0.000746461	0.344206	0.00302083	0.00064699	552.998	639.49	639.497	88.9682	9.55773	9.59959	108.086	33.7344	33.7521	60.9656	26.1148	26.132	16.0884
Monastery	2016	FE24B182	ok	0.00810178	296.816	11.5671	0.32381	71.7176	3.56578	0.0542261	0.00834012	0.104207	0.0168439	0.0139436	0.00069327	0.307596	0.00543311	0.000856886	379.472	691.711	691.714	89.2652	8.87647	8.92183	100.652	32.5386	32.5545	109.518	34.5454	34.5873	23.5235
Monastery	2016	FE24B184	ok	0.000216762	278.743	11.1223	0.325283	72.1316	3.41791	0.0479579	0.00978977	0.0916319	0.0192024	0.0138636	0.000656917	0.226114	0.00434457	0.000781303	96.1624	966.443	966.444	88.7564	8.41134	8.45865	89.0225	37.3111	37.322	87.6232	31.5153	31.5448	92.2984
Mudtank	2015	AP29A326	ok	0.00610396	2793.84	15.218	0.518335	8.64411	0.193458	0.0679412	0.00283984	1.08324	0.0513597	0.115686	0.00258909	0.472031	0.0359316	0.00152671	865.859	173.337	173.398	705.684	31.5869	32.3757	745.215	70.6657	71.0662	713.514	60.6334	61.6394	81.501	0.969852
Mudtank	2015	AP29A327	ok	0.00369742	2732.51	14.6418	0.51931	8.52503	0.170801	0.0662407	0.00311294	1.07088	0.0547081	0.117302	0.00235016	0.392178	0.0355982	0.00162158	813.081	196.522	196.569	715.013	28.6509	29.5409	739.172	75.5242	75.893	707.009	64.4117	65.3425	87.9388	0.966687
Mudtank	2015	AP29A328	ok	-0.00159976	2993.48	16.052	0.517851	8.59649	0.167153	0.0617158	0.00239362	0.989435	0.0429275	0.116327	0.00226189	0.448173	0.0350695	0.00148968	663.342	166.183	166.22	709.385	27.5871	28.4961	698.432	60.6041	61.0141	696.687	59.1876	60.1702	106.941	0.956838
Mudtank	2015	AP29A329	ok	0.00434654	2805.39	15.4013	0.516048	8.64943	0.176982	0.0664838	0.00308443	1.05935	0.0537151	0.115615	0.00236566	0.403538	0.0369761	0.0016767	820.737	193.774	193.823	705.272	28.8621	29.7222	733.504	74.3856	74.7543	733.883	66.5568	67.5273	85.9316	0.973487
Mudtank	2015	AP29A330	ok	-0.000368774	2636.56	14.4954	0.516294	8.72887	0.192163	0.0624272	0.00271261	0.985661	0.0480125	0.114562	0.00252205	0.451944	0.0345672	0.00143398	687.846	185.433	185.468	699.19	30.7848	31.5789	696.504	67.8547	68.2191	686.876	56.9885	57.98	101.649	0.965876
Mudtank	2015	AP29A331	ok	-0.00035203	2833.38	15.1382	0.519275	8.52969	0.169848	0.0628981	0.00259946	1.01629	0.0466223	0.117238	0.0023345	0.434061	0.0319198	0.00149357	703.86	175.905	175.944	714.644	28.4608	29.3557	712.045	65.3303	65.7257	635.087	59.433	60.2473	101.532	0.973926
Mudtank	2015	AP29A332	ok	0.00711588	3124.08	17.2752	0.506814	8.75323	0.16892	0.0685245	0.00282863	1.07892	0.0491635	0.114243	0.00220467	0.423506	0.0374961	0.00151465	883.561	170.708	170.772	697.345	26.9147	27.8149	743.107	67.7227	68.1381	744.017	60.109	61.2114	78.9244	0.964328
Mudtank	2015	AU14A010	ok	0.00348675	1213.76	5.3878	0.347271	8.6233	0.214986	0.0658371	0.00390909	1.05223	0.0677601	0.115965	0.0028911	0.387143	0.0401818	0.00286754	800.288	248.805	248.841	707.297	35.2669	35.9783	729.985	94.0174	94.3066	796.271	113.65	114.322	88.3802
Mudtank	2015	AU14A048	ok	0.00391945	1453.97	6.40389	0.367982	8.58508	0.192398	0.0662818	0.00351487	1.06405	0.0612576	0.116481	0.00261043	0.389276	0.0324599	0.00235563	814.378	221.713	221.755	710.278	31.8357	32.6285	735.818	84.7224	85.0484	645.663	93.7124	94.2483	87.2172
Mudtank	2015	AU14A052	ok	0.0057553	1854.19	8.00497	0.357716	8.54406	0.170861	0.0678886	0.00302339	1.09508	0.0534599	0.11704	0.00234053	0.409634	0.0368869	0.00207961	864.252	184.731	184.787	713.507	28.5369	29.4267	750.968	73.322	73.714	732.145	82.5536	83.3343	82.5577
Mudtank	2015	AU14A053	ok	0.00195038	2385.64	10.7114	0.343589	8.55754	0.158207	0.0647267	0.00231686	1.04243	0.0419962	0.116856	0.00216038	0.458896	0.0371935	0.00184592	764.547	150.857	150.911	712.442	26.3425	27.3011	725.126	58.4261	58.8842	738.121	73.2659	74.1589	93.1849
Mudtank	2015	AU14A050	ok	0.000261261	1459.15	6.39932	0.360065	8.52986	0.184952	0.0634023	0.00321177	1.02441	0.0564477	0.117235	0.002542	0.393501	0.0319439	0.00213763	720.827	215.015	215.048	714.631	30.9905	31.8143	716.129	78.921	79.2524	635.56	85.0612	85.6329	99.1404
Mudtank	2015	AU14A056	ok	0.00409342	942.917	4.1052	0.312823	8.48688	0.216294	0.0666577	0.0040547	1.08247	0.0713906	0.117829	0.00300295	0.386428	0.0334188	0.0030664	826.188	253.844	253.882	718.055	36.6002	37.307	744.837	98.2467	98.5349	664.426	121.931	122.368	86.9119
Mudtank	2015	AU14A016	ok	0.00421617	958.144	4.15417	0.313681	8.45352	0.234957	0.0668392	0.00417647	1.0897	0.0745223	0.118294	0.00328786	0.406416	0.041891	0.00368712	831.86	260.523	260.56	720.736	40.0643	40.7157	748.357	102.357	102.637	829.455	146.012	146.581	86.6416
Mudtank	2015	AU14A046	ok	-0.000599185	961.269	4.14244	0.30159	8.4667	0.218158	0.0628445	0.00372929	1.02297	0.0661806	0.11811	0.00304328	0.398282	0.0342532	0.00320602	702.045	252.651	252.678	719.675	37.0871	37.7878	715.408	92.5655	92.8476	680.741	127.431	127.87	102.511
Mudtank	2015	AU14A047	ok	-0.00570853	934.701	4.03775	0.311043	8.36653	0.21373	0.0588812	0.00386545	0.969937	0.0683258	0.119524	0.00305333	0.362643	0.0368369	0.00328172	561.758	286.104	286.12	727.823	37.1856	37.9003	688.432	96.991	97.2404	731.17	130.277	130.772	129.562
Mudtank	2015	AU14A043	ok	0.000151978	977.218	4.12366	0.309389	8.34732	0.213655	0.063754	0.00410186	1.05262	0.0728869	0.119799	0.00306633	0.369648	0.0267142	0.00313052	732.556	272.566	272.594	729.406	37.3392	38.0541	730.18	101.12	101.389	532.866	124.889	125.163	99.57
Mudtank	2015	AU14A097	ok	-0.00182522	962.78	4.08552	0.317301	8.33214	0.206081	0.0621635	0.00415904	1.02823	0.073344	0.120017	0.00296841	0.346743	0.0333227	0.00312299	678.809	285.941	285.963	730.663	36.1433	36.8839	718.043	102.436	102.693	662.547	124.187	124.614	107.639
Mudtank	2015	AU14A092	ok	0.002321	963.667	4.10913	0.31781	8.25963	0.213703	0.065761	0.00431831	1.09729	0.0774465	0.121071	0.00313248	0.366579	0.0311094	0.00319698	797.865	275.276	275.308	736.724	38.1227	38.8372	752.038	106.158	106.43	619.208	127.267	127.63	92.3369
Mudtank	2015	AU14A096	ok	-0.00302278	991.292	4.16977	0.30218	8.26081	0.201644	0.061356	0.00337074	1.02364	0.0615373	0.121054	0.00295489	0.406043	0.0340503	0.00339806	650.803	235.882	235.907	736.625	35.9617	36.718	715.741	86.0552	86.3589	676.775	135.078	135.487	113.187
Mudtank	2015	AU14A057	ok	-0.000868276	977.413	4.10337	0.320587	8.24837	0.215843	0.0631624	0.00424362	1.05537	0.0760939	0.121236	0.0031725	0.36293	0.0373276	0.0034894	712.778	285.546	285.571	737.674	38.6069	39.3143	731.536	105.49	105.749	740.733	138.488	138.966	103.493
Mudtank	2015	AU14A055	ok	-0.00131694	1410.23	5.91414	0.370928	8.17043	0.182462	0.0629934	0.00332932	1.06258	0.060967	0.122393	0.00273327	0.389219	0.0364513	0.00240557	707.081	224.835	224.866	744.32	33.2443	34.0779	735.095	84.3541	84.6809	723.651	95.5135	96.1736	105.267
Mudtank	2016	JN08C508	ok	0.00809204	1193.28	5.87129	0.35872	8.7622	0.230633	0.0693067	0.00484269	1.09012	0.0813955	0.114127	0.00300396	0.352518	0.036936	0.00287091	906.986	287.902	287.942	696.669	36.6745	37.3388	748.562	111.785	112.041	733.102	113.963	114.532	76.8114
Mudtank	2016	JN08C507	ok	0.000564224	1626.8	8.09627	0.350325	8.73692	0.188316	0.0631761	0.00318263	0.996568	0.0546064	0.114457	0.00246701	0.393362	0.0360829	0.00239883	713.239	214.091	214.125	698.58	30.1144	30.9243	702.066	76.9386	77.2653	716.466	95.263	95.9118	97.9447
Mudtank	2016	JN08C506	ok	0.00312955	1407.07	6.87139	0.360501	8.63375	0.192892	0.0655192	0.00383758	1.04588	0.0655643	0.115825	0.00258771	0.356393	0.0375738	0.0024434	790.14	245.838	245.874	706.486	31.5681	32.359	726.839	91.1285	91.4243	745.53	96.9625	97.6526	89.4127
Mudtank	2016	JN08C509	ok	0.00583933	1186.65	5.71593	0.371198	8.44709	0.228387	0.0681907	0.00386818	1.11258	0.0699142	0.118384	0.00320079	0.430259	0.032058	0.00274465	873.455	234.96	235.006	721.255	39.0017	39.6716	759.414	95.4429	95.7512	637.795	109.21	109.659	82.575
Mudtank	2016	JN08C332	ok	0.0081503	1260.04	5.93374	0.365257	8.38746	0.204622	0.0702397	0.00430956	1.15416	0.0762059	0.119226	0.00290865	0.369486	0.0431713	0.0028741	934.475	251.726	251.775	726.105	35.4284	36.1743	779.204	102.898	103.199	854.277	113.746	114.518	77.7019
Mudtank	2014	MA13A043	ok	0.0254101	354.909	5.67768	0.382244	8.65409	0.462787	0.0837929	0.0107426	1.33444	0.185367	0.115552	0.00617929	0.384969	0.0416136	0.00498807	1286.9	499.221	499.267	704.913	75.3921	75.7252	860.812	239.151	239.31	824.075	197.558	197.972	54.776	0.986377
Mudtank	2014	MA13A170	ok	0.010883	403.295	6.15305	0.362655	8.22194	0.411271	0.0729121	0.00949768	1.22219	0.170539	0.121626	0.00608387	0.358482	0.0399458	0.00446311	1010.63	528.226	528.253	739.915	74.0229	74.3966	810.775	226.265	226.413	791.684	176.908	177.336	73.2134	0.98717
Mudtank	2014	MA13A005	ok	-0.0037567	387.488	5.69476	0.367828	8.18034	0.404201	0.060957	0.00879083	1.02699	0.156557	0.122244	0.00604025	0.324129	0.0314788	0.00383377	636.782	620.646	620.655	743.468	73.4714	73.8515	717.419	218.732	218.852	626.448	152.589	152.899	116.754	1.01289
Mudtank	2014	MA13A078	ok	-0.00465483	390.387	6.02089	0.377805	8.11354	0.417451	0.060391	0.00749878	1.02583	0.137879	0.123251	0.0063414	0.382798	0.0357409	0.00361083	616.673	536.181	536.191	749.247	77.0993	77.4672	716.838	192.698	192.834	709.794	143.418	143.842	121.498	0.979928
Mudtank	2014	MA13A128	ok	-0.00840452	382.348	5.60636	0.3605	8.00933	0.427447	0.0575767	0.0117161	0.990747	0.208422	0.124854	0.00666332	0.253691	0.0176714	0.0042743	512.734	894.246	894.25	758.444	80.9543	81.3135	699.101	294.138	294.223	354.058	171.277	171.366	147.922	0.982116
NIST610	2015	AP29A091	ok		167218	466.961	0.985164	4.42432	0.0562563	0.911668	0.00261759	28.3989	0.370191	0.226023	0.00287394	0.97544	0.49416	0.00609393														1.83804
NIST610	2015	AP29A140	ok		167445	464.91	0.989833	4.39317	0.0562383	0.912512	0.00268658	28.6268	0.376027	0.227626	0.0029139	0.974557	0.497916	0.0061049														1.86315
NIST610	2015	AP29A042	ok		169721	465.298	0.987222	4.38122	0.0547825	0.911781	0.0027263	28.6819	0.368747	0.228247	0.00285398	0.972579	0.498869	0.00612687														1.64974
NIST610	2015	AP29A359	ok		164755	470.857	0.985995	4.39118	0.0569539	0.911216	0.00264111	28.5991	0.380081	0.227729	0.00295366	0.975928	0.494625	0.00616202														2.11317
NIST610	2015	AP29A378	ok		165206	469.989	0.988367	4.351	0.0544859	0.909708	0.00266074	28.8155	0.370557	0.229832	0.0028781	0.973792	0.49568	0.00609558
NIST610	2015	AP29A322	ok		166124	456.879	0.997533	4.33299	0.056464	0.910146	0.00285203	28.9492	0.387996	0.230788	0.00300744	0.972284	0.497878	0.00610333
NIST610	2015	AP29A266	ok		168769	456.401	0.993801	4.33857	0.0552807	0.909254	0.00284083	28.8836	0.378928	0.230491	0.00293684	0.971228	0.500358	0.00615703
NIST610	2015	AP29A304	ok		168420	458.899	0.986104	4.34815	0.0551447	0.908688	0.00285264	28.802	0.3763	0.229983	0.00291671	0.970703	0.500012	0.00615161
NIST610	2015	AP29A341	ok		167585	453.438	0.991357	4.32524	0.0550344	0.909356	0.00283784	28.9759	0.379616	0.231201	0.00294181	0.971216	0.501258	0.00610894
NIST610	2015	AP29A225	ok		165477	467.729	0.994155	4.35925	0.0567969	0.908296	0.00270035	28.7162	0.383762	0.229397	0.00298883	0.974941	0.499208	0.00612756
NIST610	2015	AP29A181	ok		168555	466.3	0.991486	4.35485	0.0560402	0.907936	0.00286755	28.7339	0.380734	0.229629	0.00295497	0.971177	0.498206	0.00620547
NIST610	2015	AP29A247	ok		165955	457.295	0.995653	4.34953	0.0540826	0.907739	0.0025629	28.7628	0.366744	0.22991	0.00285873	0.975176	0.496605	0.0061263
NIST610	2015	AP29A025	ok		166943	466.5	0.990031	4.34879	0.0564333	0.90688	0.00281622	28.7405	0.38349	0.229949	0.002984	0.972541	0.494139	0.00609137
NIST610	2015	AP29A001	ok		170743	456.696	0.99101	4.32575	0.0560862	0.907069	0.00276468	28.8995	0.384916	0.231174	0.00299732	0.973464	0.494831	0.00606434
NIST610	2015	AP29A002	ok		169094	451.473	0.994441	4.33234	0.0575387	0.906188	0.00264317	28.8276	0.39199	0.230822	0.0030656	0.976723	0.488815	0.00602805
NIST610	2015	AP29A377	ok		166219	454.37	0.989164	4.34431	0.0565002	0.905314	0.00282823	28.7204	0.384151	0.230186	0.00299371	0.972342	0.497656	0.00607899
NIST610	2015	AU14A083	ok		166106	463.334	0.989327	4.34691	0.0511858	0.913969	0.00251172	28.9776	0.350387	0.230048	0.00270887	0.97383	0.508404	0.00619375
NIST610	2015	AU14A042	ok		164775	464.049	0.980842	4.37762	0.0521063	0.911262	0.00269973	28.6891	0.351902	0.228435	0.00271903	0.970393	0.510229	0.0062811
NIST610	2015	AU14A001	ok		163786	464.299	0.991168	4.39833	0.0516991	0.909152	0.00266921	28.4879	0.345142	0.227359	0.00267244	0.970194	0.504993	0.00613471
NIST610	2015	AU14A106	ok		169824	463.191	0.99109	4.34501	0.051275	0.910732	0.0025728	28.8876	0.350532	0.230149	0.00271596	0.972522	0.503711	0.00618783
NIST610	2015	AU14A107	ok		169177	460.514	0.994079	4.37505	0.05152	0.909756	0.00265004	28.6586	0.347651	0.228569	0.0026916	0.970742	0.500282	0.00612699
NIST610	2015	AU14A002	ok		165520	460.925	0.991803	4.36769	0.0525452	0.908532	0.00269783	28.6682	0.355242	0.228954	0.00275442	0.970863	0.507094	0.00616273
NIST610	2015	AU14A021	ok		167874	456.411	0.99508	4.32787	0.0533264	0.909056	0.00271833	28.9487	0.367049	0.231061	0.00284704	0.971792	0.510345	0.0062701
NIST610	2015	AU14A120	ok		166489	458.84	0.987123	4.38164	0.0522054	0.906444	0.00256481	28.5112	0.349147	0.228225	0.0027192	0.97294	0.499377	0.00606074
NIST610	2015	AU14A095	ok		168015	462.462	0.995457	4.3672	0.054316	0.906462	0.00254748	28.6061	0.364751	0.228979	0.00284787	0.975408	0.504824	0.00623611
NIST610	2016	MY25B2163	ok		158393	465.349	0.988009	4.44657	0.0423241	0.911585	0.00258991	28.2543	0.28066	0.224893	0.00214061	0.958225	0.495882	0.00567671
NIST610	2016	MY25B2390	ok		154971	462.247	0.990436	4.44048	0.0416556	0.910347	0.00276564	28.2546	0.278606	0.225201	0.00211258	0.951355	0.498405	0.00571431
NIST610	2016	MY25B2233	ok		158105	456.101	0.991085	4.43222	0.0436037	0.910412	0.00266779	28.3093	0.290596	0.225621	0.00221963	0.958389	0.498407	0.0057192
NIST610	2016	MY25B2256	ok		157993	455.309	0.996375	4.42389	0.0392144	0.910411	0.00270085	28.3626	0.265119	0.226045	0.00200372	0.948301	0.497038	0.00559122
NIST610	2016	MY25B2140	ok		159249	456.908	0.990209	4.43557	0.0402109	0.909992	0.00270819	28.2748	0.269785	0.22545	0.00204383	0.950113	0.495523	0.00565074
NIST610	2016	MY25B2324	ok		155380	461.691	0.988999	4.44319	0.0416289	0.90951	0.00281843	28.2114	0.278399	0.225064	0.00210866	0.949417	0.499464	0.0057321
NIST610	2016	MY25B2278	ok		156489	460.152	0.989963	4.43834	0.0388043	0.908925	0.00265572	28.2241	0.260177	0.225309	0.00196987	0.948439	0.497092	0.00564027
NIST610	2016	MY25B2389	ok		154352	461.111	0.992331	4.42609	0.0423484	0.909194	0.00282012	28.3105	0.284751	0.225933	0.0021617	0.951261	0.497876	0.00570778
NIST610	2016	MY25B2055	ok		158043	459.808	0.994144	4.44103	0.0394545	0.908352	0.00279933	28.1892	0.265074	0.225173	0.00200045	0.944772	0.493103	0.00559855
NIST610	2016	MY25B2346	ok		156666	460.395	0.989477	4.43261	0.0423803	0.908253	0.00267376	28.2397	0.28251	0.225601	0.00215698	0.955723	0.500973	0.00572441
NIST610	2016	MY25B2186	ok		159727	470.052	0.988713	4.42054	0.0420172	0.908506	0.00270971	28.3247	0.28217	0.226217	0.00215019	0.954128	0.499388	0.00560903
NIST610	2016	MY25B2209	ok		156777	463.726	0.991282	4.43749	0.0427544	0.907841	0.00271064	28.1958	0.284407	0.225353	0.00217123	0.955185	0.49525	0.00566193
NIST610	2016	MY25B2094	ok		158886	464.157	0.991049	4.43871	0.0412167	0.907503	0.00265369	28.1776	0.274317	0.225291	0.002092	0.953824	0.49373	0.00569712
NIST610	2016	MY25B2301	ok		157515	465.717	0.98747	4.42743	0.0437254	0.907676	0.00279246	28.2547	0.29227	0.225865	0.00223065	0.954748	0.499532	0.00566668
NIST610	2016	MY25B2031	ok		155751	461.647	0.985585	4.43767	0.043996	0.907039	0.0026398	28.1698	0.291066	0.225343	0.0022341	0.959512	0.495567	0.0056401
NIST610	2016	MY25B2118	ok		160747	471.743	0.988073	4.41976	0.0423286	0.907531	0.00269183	28.2993	0.283727	0.226257	0.00216689	0.955237	0.497823	0.0056728
NIST610	2016	MY25B2074	ok		162679	454.376	0.991137	4.39549	0.040245	0.907918	0.00272185	28.4677	0.274265	0.227506	0.00208304	0.950354	0.497221	0.00568401
NIST610	2016	MY25B2030	ok		156504	457.826	0.995065	4.44864	0.0407269	0.913382	0.0026476	28.2968	0.27173	0.224788	0.00205792	0.953354	0.490603	0.00559842
NIST610	2014	MA13A042	ok		45784.4	461.393	0.987199	4.48718	0.0784717	0.911967	0.00415191	28.0103	0.506171	0.222857	0.00389732	0.967744	0.473712	0.00632972
NIST610	2014	MA13A168	ok		44912.8	459.42	0.996337	4.54003	0.0799387	0.909935	0.00383702	27.6225	0.500118	0.220263	0.00387829	0.9725	0.473024	0.00650168
NIST610	2014	MA13A077	ok		45043	458.298	0.988632	4.4853	0.0795508	0.911029	0.00402035	27.9932	0.511622	0.22295	0.00395422	0.970412	0.473944	0.00630425
NIST610	2014	MA13A003	ok		48096.4	467.354	0.99226	4.52836	0.0804493	0.90702	0.00396512	27.605	0.505052	0.220831	0.00392321	0.971034	0.474546	0.00633852
NIST610	2014	MA13A113	ok		45800.3	454.003	0.993971	4.50094	0.0797703	0.907695	0.00421816	27.7938	0.509243	0.222176	0.00393762	0.9673	0.475299	0.00636038
NIST610	2014	MA13A228	ok		45563.2	468.798	0.985552	4.49136	0.0797514	0.90709	0.00391196	27.8346	0.508616	0.22265	0.0039535	0.97175	0.476699	0.0063551
OG-1	2015	AP29A300	ok	-0.00257938	158860	133.584	0.950009	1.39852	0.0166497	0.299173	0.00107466	29.4826	0.366627	0.715042	0.00851276	0.957371	0.184893	0.00237109	3465.27	11.1322	21.4505	3477.44	82.7996	89.8933	3469.72	86.2945	93.1517	3429.06	87.9492	102.84	100.351	1.00506
OG-1	2015	AP29A301	ok	-0.000641681	188247	142.87	0.971363	1.41413	0.021442	0.295094	0.00216057	28.7596	0.484251	0.70715	0.0107223	0.900511	0.179354	0.00310257	3443.98	22.7259	29.1298	3447.7	104.553	110.161	3445.35	116.025	121.14	3334.35	115.359	126.467	100.108	1.02434
OG-1	2015	AP29A302	ok	0.000269936	239210	209.535	0.934751	1.40252	0.0174307	0.300111	0.0011681	29.4908	0.384071	0.713005	0.00886136	0.954296	0.189633	0.0024595	3470.12	12.0581	21.9667	3469.78	86.2461	93.0486	3470	90.3825	96.9519	3509.74	91.0415	106.136	99.99	1.10185
OG-1	2015	AP29A305	ok	-0.003746	151407	121.846	0.592019	1.40007	0.0166482	0.297601	0.00123278	29.2953	0.368884	0.714252	0.00849319	0.944339	0.188868	0.00261589	3457.11	12.8453	22.3521	3474.47	82.63	89.7255	3463.46	87.2232	93.9891	3496.74	96.8623	111.07	100.502	1.07489
OG-1	2015	AP29A306	ok	0.0021677	207836	177.744	0.51104	1.40686	0.016036	0.30013	0.00110405	29.4016	0.352151	0.710802	0.00810202	0.951668	0.1877	0.00249084	3470.22	11.3961	21.6108	3461.48	78.9108	86.2597	3467.02	83.051	90.1446	3476.88	92.2785	106.94	99.7482	1.09272
OG-1	2016	JN09A074	ok	4.05523e-05	64384.5	126.542	0.981667	1.40402	0.0128331	0.29936	0.00155274	29.3856	0.308825	0.712242	0.00651007	0.86972	0.182102	0.00265529	3466.24	16.0734	24.3873	3466.9	63.3767	72.348	3466.48	72.8614	80.8517	3381.39	98.6104	111.743	100.019
OG-1	2016	JN09A120	ok	0.00140976	89159.9	164.849	0.996517	1.41054	0.0120779	0.298143	0.00151698	29.1307	0.290149	0.708948	0.00607042	0.859676	0.182527	0.00250632	3459.92	15.7746	24.1661	3454.49	59.1587	68.6198	3457.93	68.8837	77.2471	3388.65	93.0607	106.933	99.843
OG-1	2016	JN09A230	ok	-0.0085376	90830.2	176.442	0.767488	1.38712	0.0109733	0.298452	0.00139282	29.6533	0.272361	0.72092	0.00570311	0.861298	0.183815	0.00247282	3461.53	14.4668	23.3401	3499.49	55.3681	65.622	3475.39	63.8418	72.8718	3410.66	91.7657	105.979	101.097
OG-1	2016	JN09A287	ok	-0.0135528	114184	233.448	1.03625	1.37813	0.0113232	0.297729	0.00177143	29.7745	0.302045	0.725623	0.00596199	0.809942	0.190839	0.00274526	3457.77	18.4491	25.9829	3517.09	57.7954	67.7749	3479.4	70.5929	78.8716	3530.22	101.566	115.442	101.715
OG-1	2016	JN09A341	ok	0.0022768	85863.5	175.895	0.974457	1.41655	0.0118368	0.29672	0.00131007	28.8687	0.272832	0.70594	0.00589887	0.884165	0.179197	0.00249315	3452.51	13.6958	22.832	3443.13	57.5421	67.172	3449.06	65.1928	73.9323	3331.65	92.7062	106.19	99.7285
Penglai	2015	AP29A333	ok	-0.0137281	67.2821	70.8078	0.618389	1682.81	207.42	0.0352747	0.0644486	0.00288896	0.00529026	0.000594244	7.32453e-05	0.0673099	0.000167952	7.84354e-05	-688.152	10121	-10121	3.82961	0.944059	0.944846	2.92917	10.7278	10.7278	3.39441	3.17044	3.17088	-0.556506	0.990879
Penglai	2015	AP29A334	ok	0.040961	66.9131	72.983	0.627131	1718.93	196.84	0.0784669	0.0686904	0.0062913	0.00555436	0.000581757	6.66187e-05	0.129706	0.000231761	8.40719e-05	1157.86	3472.72	3472.73	3.74916	0.858654	0.859483	6.36807	11.2443	11.2445	4.68386	3.39817	3.39895	0.323801	0.970976
Penglai	2015	AP29A335	ok	0.0295506	71.5684	73.8835	0.636922	1669.26	172.936	0.0694573	0.0792317	0.00573463	0.00656856	0.000599067	6.20636e-05	0.0904475	8.95505e-05	8.15001e-05	911.455	4696.91	4696.91	3.86068	0.799936	0.800879	5.80621	13.3011	13.3012	1.80993	3.29445	3.29457	0.423573	0.975072
Penglai	2015	AP29A336	ok	0.0148327	55.5844	66.6964	0.598507	1880.44	223.709	0.0578243	0.0386517	0.00423802	0.00287735	0.000531791	6.32651e-05	0.175224	0.000374539	8.69846e-05	522.158	2932.78	2932.78	3.42723	0.81545	0.816179	4.29413	5.83088	5.83104	7.56884	3.51565	3.51761	0.65636	0.961012
Penglai	2015	AP29A337	ok	0.0217371	70.1665	65.896	0.601075	1502.4	149.873	0.0632947	0.028228	0.00580623	0.00265343	0.000665602	6.63978e-05	0.218286	0.000359267	8.45196e-05	717.224	1894.07	1894.07	4.28932	0.855771	0.856859	5.8785	5.37292	5.37325	7.26029	3.41604	3.41791	0.598044	0.964658
Penglai	2015	AP29A338	ok	0.0272649	61.3786	63.8217	0.588675	1670.73	183.764	0.0676519	0.0297283	0.00558065	0.00252796	0.00059854	6.58334e-05	0.242811	0.000151009	7.49256e-05	857.004	1824.86	1824.87	3.85728	0.848525	0.849413	5.65075	5.11943	5.11975	3.05199	3.0286	3.02897	0.450089	0.963481
Penglai	2015	AP29A339	ok	0.0717655	69.0043	71.2611	0.615638	1656.99	180.435	0.1028	0.0599716	0.00855037	0.0050743	0.000603506	6.57178e-05	0.183489	0.000167815	7.28379e-05	1674.47	2156.33	2156.35	3.88927	0.847033	0.847937	8.64499	10.2609	10.2613	3.39163	2.94419	2.94466	0.232269	0.978482
Penglai	2015	AP29A343	ok	0.0182434	68.5914	64.7585	0.591192	1481.95	175.023	0.0605365	0.0873093	0.00562984	0.00814687	0.000674787	7.96945e-05	0.0816144	0.000321213	9.16159e-05	621.866	6222.43	6222.43	4.34849	1.02714	1.02807	5.70041	16.498	16.4981	6.49138	3.70293	3.7043	0.699264	0.976756
Penglai	2015	AU14A090	ok	0.0846574	83.732	69.6329	0.686752	1651.18	127.308	0.112982	0.0269576	0.00943033	0.00236464	0.000605627	4.66944e-05	0.307483	0.000100479	5.17619e-05	1847.14	863.201	863.256	3.90294	0.601841	0.603122	9.53053	4.77953	4.7805	2.0308	2.09234	2.09258	0.211296
Penglai	2015	AU14A101	ok	0.0166409	84.2048	71.3465	0.697265	1726.4	136.416	0.0592585	0.0256716	0.00473066	0.0020832	0.00057924	4.57702e-05	0.179438	0.000313912	5.1571e-05	575.66	1883.58	1883.58	3.73294	0.589936	0.591131	4.79211	4.22052	4.2208	6.34387	2.0844	2.08673	0.648463
Penglai	2015	AU14A116	high common pb in 1st half	0.152412	86.1182	66.8598	0.679097	1417.18	169.726	0.166512	0.0496767	0.0161932	0.00520576	0.000705627	8.45083e-05	0.37254	0.000455721	0.000128299	2522.15	1002.17	1002.26	4.54716	1.08917	1.09013	16.3106	10.487	10.4883	9.20904	5.18524	5.18721	0.180289
Penglai	2015	AU14A100	ok	0.0101526	87.6203	71.0544	0.691333	1647	129.661	0.0541375	0.0280091	0.00453019	0.00237076	0.000607164	4.77991e-05	0.150433	0.000146077	5.63232e-05	375.796	2328.32	2328.32	3.91284	0.616078	0.617336	4.58949	4.80359	4.80381	2.95232	2.27667	2.27713	1.04121
Penglai	2015	AU14A074	ok	-0.00991527	88.2135	71.5622	0.700212	1647.13	126.34	0.0382877	0.0225455	0.00320364	0.00190238	0.000607116	4.65675e-05	0.129169	0.000187647	5.36132e-05	-466.405	3113.67	-3113.67	3.91254	0.600205	0.601495	3.24772	3.85711	3.85725	3.7924	2.16708	2.16788	-0.838871
Penglai	2015	AU14A114	ok	-0.00550741	84.6992	68.5487	0.681059	1608.86	117.275	0.0417708	0.0235591	0.00357822	0.00203493	0.000621557	4.53074e-05	0.128175	0.000357912	6.06976e-05	-241.436	2849.61	-2849.61	4.00557	0.583959	0.585349	3.62678	4.12509	4.12526	7.2329	2.45323	2.4558	-1.65906
Penglai	2015	AU14A091	ok	-0.0142229	90.0479	71.7433	0.694964	1568.96	119.967	0.0348891	0.0189335	0.00306472	0.00167958	0.000637365	4.87347e-05	0.139521	0.000235173	6.3145e-05	-718.697	3025.87	-3025.87	4.10741	0.628128	0.629487	3.1071	3.40562	3.40577	4.75282	2.5523	2.55337	-0.571508
Penglai	2015	AU14A109	ok	0.0161449	93.2895	71.5402	0.692066	1516.34	110.759	0.0588771	0.0222102	0.00535132	0.00205617	0.000659482	4.81707e-05	0.1901	0.000165339	5.30637e-05	561.605	1644.06	1644.06	4.24989	0.620852	0.622323	5.41916	4.16447	4.16483	3.34159	2.14489	2.14552	0.75674
Penglai	2015	AU14A112	ok	0.0443794	96.6205	72.7709	0.699645	1471.17	108.258	0.0811802	0.0257765	0.007605	0.00247875	0.000679731	5.0019e-05	0.225769	0.000119277	5.40801e-05	1224.95	1247.39	1247.41	4.38034	0.644668	0.646174	7.69277	5.01472	5.01533	2.41071	2.18603	2.18635	0.357592
Penglai	2015	AU14A115	ok	0.00740844	91.8273	68.0212	0.675773	1493.87	113.566	0.051978	0.024704	0.00479532	0.00230808	0.000669401	5.08888e-05	0.157944	0.000289507	7.87707e-05	283.446	2174.31	2174.31	4.31379	0.655881	0.657317	4.85745	4.67597	4.67622	5.85074	3.1838	3.1851	1.52191
Penglai	2015	AU14A113	ok	0.0269717	93.4554	68.6629	0.685765	1459.28	110.029	0.0674317	0.0206275	0.00636853	0.00200645	0.000685271	5.16693e-05	0.239321	0.000232387	5.35947e-05	850.232	1271.7	1271.71	4.41603	0.665936	0.667417	6.44599	4.06171	4.06223	4.69652	2.16629	2.16752	0.519391
Penglai	2015	AU14A110	ok	0.124349	106.732	71.2311	0.69435	1311.99	92.9248	0.144356	0.0262039	0.0151641	0.00295475	0.000762203	5.3985e-05	0.363496	0.000457767	6.58759e-05	2279.37	625.172	625.288	4.9116	0.695754	0.697508	15.2818	5.95536	5.95736	9.25038	2.66239	2.66627	0.215481
Penglai	2015	AU14A111	ok	0.0113341	96.1068	72.867	0.709622	1468.29	112.136	0.0550801	0.0191549	0.00517007	0.00184081	0.000681067	5.20144e-05	0.214497	0.000178819	5.02393e-05	414.503	1554.45	1554.45	4.38894	0.670384	0.671838	5.23608	3.72862	3.729	3.614	2.03071	2.03149	1.05885
Penglai	2015	AU14A117	ok	0.00252711	93.4858	69.9693	0.718878	1476.01	117.165	0.0481236	0.0273926	0.00449347	0.00258249	0.000677504	5.37803e-05	0.138119	0.000119364	4.98397e-05	104.32	2690.78	2690.78	4.36599	0.693146	0.694537	4.55238	5.23269	5.2329	2.41246	2.01462	2.01497	4.18519
Penglai	2015	AU14A108	ok	0.00273438	103.96	76.0184	0.711959	1470.36	112.144	0.0482876	0.0219705	0.0045261	0.00208807	0.000680106	5.18716e-05	0.165322	0.000244234	5.08503e-05	112.357	2147.62	2147.62	4.38275	0.668544	0.669998	4.58536	4.23082	4.23107	4.93591	2.05535	2.05678	3.90075
Penglai	2016	FE24B168	ok	0.0636253	32.9347	31.248	0.575966	1780.59	254.691	0.0963644	0.113491	0.00745873	0.00884887	0.000561611	8.03315e-05	0.120567	0.000218255	0.000104725	1554.07	4421.59	4421.6	3.61936	1.03541	1.03605	7.54536	17.9033	17.9035	4.41093	4.233	4.23356	0.232896
Penglai	2016	FE24B170	ok	0.0489628	34.6543	31.2337	0.571836	1724.74	228.839	0.0847865	0.149082	0.00677508	0.0119467	0.000579796	7.69273e-05	0.0752441	0.000310113	0.000114649	1309.82	6824.71	6824.72	3.73652	0.991523	0.992236	6.8561	24.1791	24.1792	6.2671	4.63392	4.63494	0.285271
Penglai	2016	FE24B167	ok	0.0437243	36.1327	30.3898	0.582881	1672.48	244.743	0.0806516	0.0152695	0.00664604	0.00159032	0.000597913	8.74958e-05	0.611545	0.000459071	0.000105118	1212.11	745.155	745.182	3.85324	1.12773	1.1284	6.72595	3.21888	3.2196	9.27672	4.24835	4.2508	0.317895
Penglai	2016	FE24B166	ok	0.0281007	36.2653	30.6293	0.577774	1592.01	201.794	0.068316	0.0188041	0.00591411	0.00179218	0.000628137	7.9619e-05	0.418281	0.000249618	0.000126633	877.254	1139.42	1139.43	4.04796	1.02619	1.027	5.98739	3.62879	3.62929	5.04471	5.11843	5.11903	0.461436
Penglai	2016	FE24B169	ok	0.0458242	38.2253	30.8334	0.574142	1553.57	202.564	0.0823164	0.0226679	0.00730245	0.00222493	0.00064368	8.39271e-05	0.427941	0.000459768	0.000124805	1252.2	1077.6	1077.62	4.14809	1.08171	1.08252	7.38784	4.5019	4.50252	9.2908	5.04403	5.0461	0.331263
Penglai	2016	FE24B165	ok	0.0377528	38.5257	30.9608	0.575135	1517.94	216.84	0.0759434	0.018855	0.00689523	0.00197507	0.000658789	9.41091e-05	0.498713	0.000522725	0.00013234	1092.71	994.434	994.451	4.24543	1.21293	1.21369	6.97727	3.99715	3.99777	10.5627	5.3484	5.35091	0.388524
Penglai	2016	FE24B164	ok	-0.002417	38.4063	31.1827	0.578681	1533.58	188.35	0.0442154	0.0296341	0.00397357	0.00270752	0.000652071	8.00856e-05	0.180248	0.000277757	0.00012645	-99.7508	3293.46	-3293.46	4.20215	1.03219	1.03306	4.0267	5.48744	5.48759	5.6133	5.11098	5.11173	-4.21265
Penglai	2016	FE24B171	ok	0.0404215	42.4825	32.2696	0.558285	1436.62	184.605	0.0780563	0.0210851	0.00748819	0.00223996	0.000696077	8.94453e-05	0.429572	0.000108134	0.000106433	1147.44	1073.23	1073.24	4.48564	1.1528	1.15369	7.57506	4.5319	4.53255	2.18551	4.30228	4.30241	0.390925
Plesovice	2015	AP29A344	ok	-0.00161614	47616.9	549.613	0.0866185	18.4729	0.222633	0.0519559	0.000572382	0.387626	0.00632929	0.0541334	0.000652409	0.738095	0.0162291	0.000448133	282.476	50.4083	50.4304	339.849	8.19162	8.87711	332.634	10.8627	11.3714	325.393	17.9701	18.6683	120.311	0.958271
Plesovice	2015	AP29A345	ok	0.00182659	43983.3	510.599	0.0876507	18.7581	0.227825	0.0546091	0.000616276	0.401225	0.00665196	0.0533103	0.000647475	0.732573	0.0167921	0.000474314	395.277	50.6133	50.6565	334.813	8.13288	8.80341	342.536	11.3579	11.8741	336.587	19.0147	19.7213	84.7033	0.92059
Plesovice	2015	AP29A346	ok	0.000695996	41313.6	481.517	0.0879442	18.6949	0.220563	0.053725	0.00065932	0.396065	0.0067424	0.0534906	0.000631083	0.693045	0.016661	0.000472098	358.558	55.3965	55.429	335.916	7.9263	8.61728	338.79	11.5348	12.0326	333.981	18.9271	19.6261	93.6854	0.841984
Plesovice	2015	AP29A347	ok	-5.74862e-05	40557.3	477.824	0.0879777	18.585	0.219763	0.0531639	0.000652959	0.394246	0.00672156	0.053807	0.000636256	0.693571	0.0168693	0.000472108	334.813	55.6748	55.703	337.852	7.99006	8.68357	337.467	11.507	12.0022	338.121	18.9255	19.6418	100.908
Plesovice	2015	AP29A348	ok	-0.000637717	43105.4	501.766	0.0873622	18.7538	0.229083	0.0526273	0.000573032	0.386753	0.00632872	0.0533224	0.000651349	0.746485	0.017131	0.000460996	311.773	49.5609	49.5884	334.887	8.18149	8.84862	331.995	10.8654	11.372	343.323	18.4777	19.2329	107.414
Plesovice	2015	AP29A349	ok	0.000434518	47816.6	554.602	0.0871505	18.7503	0.225599	0.0534918	0.000544504	0.39318	0.00619654	0.0533325	0.000641683	0.763433	0.0170264	0.000433864	348.732	46.029	46.066	334.949	8.06004	8.73669	336.69	10.6125	11.145	341.245	17.3911	18.182	96.0477	0.959877
Plesovice	2015	AP29A350	ok	-0.00128974	40108	471.932	0.0876564	18.8311	0.229438	0.0520712	0.000647402	0.381095	0.006634	0.0531035	0.000647011	0.699917	0.0173014	0.00048565	287.544	56.8371	56.8575	333.547	8.12786	8.7939	327.844	11.414	11.8855	346.709	19.4643	20.1966	115.999
Plesovice	2016	MY25B2347	ok	0.000473289	59082.1	559.751	0.0848287	18.7201	0.1244	0.0535354	0.000505777	0.394136	0.00455249	0.0534186	0.000354981	0.575321	0.0165492	0.000379491	350.573	42.7065	42.7468	335.476	4.45866	5.59293	337.386	7.794	8.50769	331.758	15.2152	16.0653	95.6937
Plesovice	2016	MY25B2034	ok	0.000633312	92930.4	858.667	0.133398	18.5794	0.126151	0.0537223	0.000412183	0.398506	0.00408286	0.053823	0.000365449	0.662719	0.0167272	0.000271051	358.446	34.6343	34.6862	337.95	4.58925	5.71238	340.564	6.97845	7.78161	335.297	10.8664	12.0517	94.282
Plesovice	2016	MY25B2095	ok	0.000227642	95047.4	872.27	0.161282	18.4727	0.118159	0.0534405	0.000409333	0.398705	0.00397874	0.0541338	0.000346263	0.640978	0.0169646	0.000259294	346.56	34.649	34.6975	339.851	4.34766	5.53198	340.708	6.79997	7.62261	340.016	10.3939	11.6604	98.0641
Plesovice	2016	MY25B2141	ok	0.000380546	110809	983.81	0.14979	18.427	0.142155	0.0535829	0.000534619	0.400758	0.00505436	0.054268	0.000418651	0.611679	0.0176927	0.000336088	352.577	45.0859	45.1245	340.672	5.25623	6.27575	342.198	8.6316	9.2991	354.483	13.4674	14.551	96.6234
Plesovice	2016	MY25B2234	ok	-0.000204168	75801.7	661.76	0.0718667	18.4235	0.122052	0.0531136	0.00047676	0.397326	0.00443264	0.0542786	0.000359586	0.593824	0.0178323	0.000420873	332.667	40.7052	40.7432	340.736	4.51463	5.66953	339.707	7.57967	8.32145	357.254	16.8636	17.7544	102.426
Plesovice	2016	JN24B298	ok	0.000648784	170025	1909.09	0.110529	18.5252	0.183395	0.0537575	0.000341937	0.399935	0.00470607	0.0539806	0.000534397	0.84131	0.0175116	0.000266052	359.922	28.7055	28.7686	338.914	6.71035	7.52762	341.601	8.0393	8.74971	350.886	10.6619	11.976	94.1633
Plesovice	2016	JN24B399	ok	0.00047904	78373.9	844.79	0.106481	18.4176	0.133185	0.0536662	0.000454383	0.401587	0.00447153	0.0542958	0.000392635	0.64945	0.0166615	0.000323676	356.086	38.2361	38.2825	340.842	4.92952	6.00576	342.799	7.63388	8.38373	333.991	12.9766	13.9766	95.719
Plesovice	2016	JN24B421	ok	3.28501e-05	134860	1398.88	0.100759	18.3892	0.167762	0.053319	0.000417216	0.399607	0.00480286	0.0543799	0.0004961	0.759038	0.0172463	0.000316384	341.412	35.4291	35.4751	341.356	6.22828	7.11308	341.363	8.20566	8.90186	345.614	12.6806	13.7717	99.9834
Plesovice	2016	JN24B258	ok	0.000281632	218891	2399.97	0.123233	18.1849	0.165783	0.0536074	0.000291762	0.40628	0.00431369	0.0549906	0.000501322	0.858626	0.0174486	0.000243014	353.609	24.5894	24.6605	345.088	6.292	7.18702	346.192	7.35143	8.14206	349.633	9.739	11.1527	97.5905
Plesovice	2016	JN08C511	ok	-0.000705454	60824.1	615.183	0.0966755	18.5913	0.139111	0.0526397	0.000541012	0.390226	0.00496093	0.0537887	0.000402479	0.58858	0.0167757	0.000369604	312.307	46.7762	46.8054	337.74	5.05435	6.09115	334.535	8.50585	9.15359	336.261	14.8171	15.712	108.144
Plesovice	2016	JN08C436	ok	-0.000594845	51187.5	509.764	0.0890501	18.5871	0.133284	0.0527305	0.000609701	0.390988	0.00531965	0.0538009	0.000385796	0.527046	0.0168616	0.00044014	316.227	52.5875	52.6141	337.815	4.84481	5.91887	335.091	9.11827	9.72725	337.969	17.6441	18.4095	106.827
Plesovice	2016	JN08C373	ok	7.0111e-05	75674.4	768.355	0.100195	18.5423	0.134672	0.0532844	0.000480031	0.396048	0.00458305	0.0539306	0.000391695	0.627634	0.0169129	0.000339364	339.942	40.8004	40.84	338.609	4.91859	5.98395	338.778	7.84064	8.55606	338.989	13.6039	14.5887	99.6077
Plesovice	2016	JN08C334	ok	0.000521678	105712	1043.3	0.0891265	18.4825	0.127391	0.0536731	0.000465299	0.400229	0.00443263	0.0541053	0.000372922	0.622337	0.0166204	0.000351439	356.376	39.1477	39.1931	339.677	4.68246	5.79776	341.814	7.57135	8.32269	333.174	14.09	15.0116	95.3142
Plesovice	2014	MA13A129	ok	0.00107158	13953.6	454.633	0.0863502	18.7653	0.273582	0.0539984	0.00117812	0.396586	0.0104066	0.0532898	0.000776921	0.5556	0.0168563	0.00050228	370.005	98.286	98.3055	334.688	9.75893	10.324	339.169	17.7999	18.1272	337.863	20.1352	20.8088	90.455	1.03061
Plesovice	2014	MA13A130	ok	0.000226231	12331.8	412.176	0.081524	18.7844	0.273616	0.0533103	0.00111945	0.391135	0.00999593	0.0532358	0.000775441	0.569966	0.016892	0.000704247	341.041	95.0829	95.1	334.357	9.7406	10.3056	335.199	17.1328	17.4647	338.573	28.231	28.7174	98.0402	1.00013
Plesovice	2014	MA13A171	ok	-0.000233808	30310.4	972.752	0.143607	18.2462	0.242449	0.0531657	0.000786156	0.401579	0.0079834	0.054806	0.000728243	0.668393	0.0168387	0.000361019	334.887	67.0289	67.0523	343.96	9.14085	9.77447	342.793	13.6294	14.0632	337.514	14.4725	15.394	102.709	1.05066
Plesovice	2014	MA13A173	ok	0.00142251	19826	638.584	0.0924261	18.4006	0.24665	0.0544331	0.000893929	0.407703	0.00864272	0.0543461	0.000728481	0.632329	0.0169308	0.000502881	388.035	73.7474	73.776	341.149	9.14585	9.76917	347.22	14.7211	15.1339	339.345	20.1585	20.8372	87.9173	1.01109
Plesovice	2014	MA13A182	ok	4.58037e-05	14288.5	466.562	0.0883165	18.3978	0.271656	0.0533258	0.00115307	0.399469	0.0104596	0.0543542	0.000802574	0.563925	0.0161085	0.000580532	341.698	97.899	97.9157	341.199	10.076	10.6452	341.263	17.871	18.201	322.993	23.2807	23.8159	99.8538
Plesovice	2014	MA13A192	ok	-0.00103075	30240.4	993.967	0.145387	17.9816	0.24271	0.05264	0.000780667	0.40346	0.00809062	0.0556125	0.000750642	0.673099	0.0179393	0.000378931	312.32	67.4963	67.5165	348.888	9.41837	10.0517	344.155	13.8027	14.2345	359.379	15.1823	16.1774	111.708	1.01297
Plesovice	2014	MA13A203	ok	-0.00106859	28711.7	925.353	0.132182	18.1891	0.251191	0.0525182	0.000835146	0.397934	0.00838111	0.054978	0.000759244	0.655695	0.0167459	0.000380842	307.045	72.4422	72.4605	345.012	9.52919	10.1422	340.148	14.3281	14.735	335.67	15.2679	16.1348	112.365	1.03282
Plesovice	2014	MA13A140	ok	0.000315712	19701.2	637.325	0.0915591	18.6312	0.273322	0.0534452	0.00104683	0.395348	0.00967479	0.0536734	0.000787393	0.599474	0.0165411	0.000483423	346.758	88.6004	88.6194	337.035	9.88866	10.4543	338.269	16.5559	16.9055	331.597	19.3823	20.0559	97.1958	1.00741
Plesovice	2014	MA13A152	ok	-0.000579113	25798.7	847.746	0.126851	18.5929	0.26205	0.0527407	0.000827214	0.390942	0.00824368	0.0537841	0.000758041	0.66839	0.0162199	0.000375493	316.669	71.3287	71.3484	337.712	9.51953	10.1082	335.057	14.1305	14.5309	325.211	15.0573	15.8832	106.645	1.04222
Plesovice	2014	MA13A139	ok	-5.68191e-05	20008.8	643.351	0.0913767	18.429	0.256476	0.0532299	0.000998448	0.398076	0.00929759	0.0542623	0.000755167	0.595855	0.0167996	0.000529079	337.624	84.9851	85.0039	340.637	9.48127	10.0821	340.252	15.8941	16.262	336.736	21.2101	21.8464	100.892	1.03778
Plesovice	2014	MA13A151	ok	0.000625227	13170.5	428.997	0.0893633	18.3628	0.269017	0.0538073	0.00120529	0.403844	0.0108091	0.0544579	0.000797814	0.547351	0.0173797	0.000555905	362.01	101.053	101.071	341.833	10.0158	10.5902	344.433	18.4378	18.7637	348.265	22.2791	22.9273	94.4264	1.0149
Plesovice	2014	MA13A202	ok	0.00189779	18648.4	604.133	0.0900984	18.2506	0.260398	0.0548803	0.000881455	0.41443	0.00890343	0.0547927	0.000781777	0.664133	0.0159484	0.000459529	406.377	71.8942	71.9263	343.879	9.81287	10.4054	352.06	15.127	15.5401	319.808	18.4296	19.0883	84.6206	1.03687
Plesovice	2014	MA13A174	ok	-0.00266657	11961	387.197	0.0747763	18.6066	0.272462	0.0510546	0.00119879	0.378164	0.0104647	0.0537444	0.000786996	0.529168	0.0172366	0.000684395	242.293	108.219	108.227	337.469	9.88334	10.4507	325.687	18.025	18.3233	345.422	27.4306	27.9511	139.281	1.02448
Plesovice	2014	MA13A204	ok	-0.000886763	16930.3	549.238	0.0911794	18.4368	0.25609	0.0525584	0.000956175	0.392887	0.0089928	0.0542392	0.00075339	0.606846	0.0168224	0.000540635	308.788	82.8513	82.8674	340.496	9.45905	10.0608	336.476	15.4032	15.7744	337.189	21.6731	22.2978	110.268	1.015
Plesovice	2014	MA13A175	ok	-0.000659781	21133.4	686.554	0.109614	18.2789	0.249441	0.0528085	0.000882429	0.398168	0.00859017	0.0547079	0.000746565	0.632532	0.0158445	0.000439877	319.589	75.9526	75.9714	343.361	9.37127	9.98821	340.319	14.6842	15.0819	317.743	17.6424	18.3207	107.438	1.02791
Plesovice	2014	MA13A206	ok	0.00044131	27105.7	897.834	0.129034	18.2507	0.245808	0.0537074	0.000821093	0.405571	0.00826341	0.0547925	0.000737969	0.661036	0.0165933	0.000412786	357.818	69.0205	69.0465	343.878	9.263	9.88851	345.681	14.0863	14.5134	332.635	16.5497	17.3386	96.1041	1.03806
Plesovice	2014	MA13A205	ok	0.00200144	20115.5	651.969	0.0900705	18.0346	0.247534	0.0550588	0.000975015	0.420759	0.0094271	0.055449	0.000761067	0.61261	0.0162962	0.000499688	413.64	79.1668	79.197	347.889	9.54992	10.1716	356.593	15.979	16.3806	326.728	20.0368	20.6704	84.1042	1.03063
Temora	2015	AP29A043	ok	-0.00047079	12839.2	124.367	0.32063	15.2813	0.205425	0.0545289	0.00117924	0.491789	0.0125227	0.0654395	0.000879695	0.527926	0.0203257	0.000560333	391.981	97.0468	97.069	408.621	10.9861	11.7307	406.129	20.683	21.0866	406.708	22.424	23.2981	104.245			April 29, 2015	418.838	Wtd Mean (from internal errs)
Temora	2015	AP29A160	ok	0.00039966	10441	98.0044	0.476479	14.9639	0.216013	0.0554392	0.00128753	0.510603	0.0139625	0.0668274	0.00096469	0.527904	0.020777	0.000497999	429.007	103.547	103.572	417.013	12.0396	12.7503	418.855	22.9072	23.2953	415.646	19.925	20.9463	97.2042				4.09286	2-sigma err. of mean
Temora	2015	AP29A374	ok	-0.00060283	12160.7	116.68	0.489118	14.9346	0.204103	0.054648	0.00107452	0.504303	0.0120758	0.0669584	0.000915083	0.570729	0.0212386	0.000492158	396.873	88.1606	88.1856	417.805	11.4198	12.1695	414.611	19.8562	20.2938	424.784	19.6869	20.7646	105.274				1.86466	MSWD
Temora	2015	AP29A005	ok	-0.000584613	5995.42	54.3185	0.254753	14.266	0.22595	0.0551323	0.00166934	0.532618	0.0182001	0.0700967	0.00111021	0.463501	0.020904	0.000966936	416.619	135.292	135.31	436.738	13.8344	14.516	433.546	29.6294	29.9519	418.16	38.6849	39.2272	104.829
Temora	2015	AP29A313	ok	-0.00224127	11893.2	109.337	0.557707	15.0308	0.214969	0.0532593	0.00122263	0.488342	0.0132081	0.0665299	0.000951502	0.528782	0.0199853	0.000441715	338.873	103.987	104.002	415.215	11.8767	12.5905	403.78	21.8419	22.2201	399.964	17.68	18.7412	122.528	0.956901
Temora	2015	AP29A315	ok	-0.0025685	16033.4	145.6	0.58362	14.9827	0.194331	0.0530264	0.00100644	0.487768	0.0112131	0.0667436	0.000865689	0.56421	0.0205438	0.000411796	328.938	86.1274	86.145	416.507	10.8045	11.5893	403.389	18.5466	18.9897	411.027	16.4779	17.6732	126.622	0.950153
Temora	2015	AP29A316	ok	0.00103517	12657.3	116.095	0.523427	14.9446	0.205118	0.055966	0.00123372	0.516124	0.0134026	0.066914	0.000918414	0.52855	0.020072	0.000485799	450.055	97.9265	97.9554	417.536	11.4616	12.2078	422.559	21.9459	22.3578	401.681	19.4437	20.4216	92.7745
Temora	2015	AP29A314	ok	0.000527603	22792.5	202.107	0.321162	14.6067	0.187213	0.0557871	0.000858181	0.526375	0.0105396	0.068462	0.000877477	0.640117	0.0217999	0.000484008	442.938	68.4208	68.4609	426.883	10.9427	11.756	429.401	17.1957	17.7352	435.891	19.3556	20.5072	96.3752	0.984665
Temora	2015	AU14A031	ok	0.000750884	23175.3	167.066	0.510693	14.9546	0.16742	0.0557294	0.000777076	0.513596	0.00918405	0.066869	0.000748613	0.626066	0.02066	0.000389507	440.637	62.0434	62.0872	417.265	9.34273	10.2433	420.865	15.0517	15.6415	413.33	15.5852	16.8575	94.6959			August 14, 2015	418.862	Wtd Mean (from internal errs)
Temora	2015	AU14A006	ok	-0.000524591	16032.7	122.388	0.284505	14.9523	0.171298	0.0546994	0.000874696	0.50418	0.00991783	0.0668791	0.000766184	0.582387	0.0211504	0.000503986	398.983	71.6716	71.7027	417.326	9.56198	10.4439	414.528	16.3085	16.8384	423.039	20.1609	21.2062	104.598				4.72594	2-sigma err. of mean
Temora	2015	AU14A012	ok	-0.00127663	19033.7	142.183	0.366175	14.8991	0.164662	0.0541268	0.000880574	0.500684	0.00984724	0.067118	0.000741774	0.561929	0.0213174	0.00043434	375.349	73.22	73.2469	418.769	9.25629	10.1708	412.165	16.2126	16.7395	426.344	17.3734	18.5945	111.568				0.236283	MSWD
Temora	2015	AU14A032	ok	-0.000308185	70212.4	475.132	0.421557	14.7727	0.169046	0.0549958	0.000599343	0.513076	0.00810776	0.0676925	0.000774613	0.724145	0.0202875	0.000345731	411.078	48.7415	48.79	422.239	9.66345	10.5567	420.516	13.2902	13.9536	405.952	13.8361	15.2071	102.715
Temora	2016	MY25B2210	ok	-3.67336e-05	8402.02	64.8362	0.374721	15.2171	0.157298	0.0549208	0.00136424	0.497414	0.013383	0.0657157	0.0006793	0.384201	0.0211159	0.000577264	408.027	111.157	111.178	410.292	8.48234	9.43418	409.951	22.0595	22.4455	422.355	23.0926	24.0077	100.555			May25, 2016	415.438	Wtd Mean (from internal errs)
Temora	2016	MY25B2075	ok	0.0012166	20831	152.683	0.479596	15.0484	0.13249	0.0560438	0.000952186	0.513274	0.00982187	0.0664522	0.000585062	0.460095	0.0207341	0.000375418	453.138	75.4343	75.4724	414.746	7.30306	8.41193	420.648	16.0988	16.6511	414.797	15.0209	16.3462	91.5274				3.33526	2-sigma err. of mean
Temora	2016	MY25B2386	ok	0.000105051	22519.8	170.516	0.35428	15.0585	0.125649	0.0551384	0.000823854	0.504644	0.00863627	0.0664078	0.000554113	0.487572	0.0213704	0.000426873	416.867	66.7591	66.7955	414.477	6.91688	8.07753	414.841	14.1988	14.8053	427.392	17.0743	18.3212	99.4268				0.761944	MSWD
Temora	2016	MY25B2302	ok	-0.000108623	28387.7	217.757	0.623617	14.9512	0.115667	0.0550366	0.000762603	0.507326	0.00805112	0.0668842	0.000517437	0.487489	0.0210828	0.000334335	412.737	61.9547	61.9932	417.357	6.4576	7.70367	416.65	13.2242	13.8789	421.702	13.3748	14.8947	101.119
Temora	2016	MY25B2033	ok	0.00117776	9947.33	73.8572	0.279445	14.8477	0.158888	0.0561467	0.00136756	0.521168	0.0138652	0.0673506	0.000720731	0.402239	0.0201581	0.000749641	457.207	108.067	108.094	420.174	8.99272	9.9375	425.931	22.663	23.0685	403.387	30.0024	30.6506	91.9002
Temora	2016	JN24B259	ok	0.0014935	17181.7	146.548	0.495585	15.0859	0.137901	0.0562431	0.000915585	0.51382	0.00959298	0.0662872	0.000605934	0.489613	0.0209171	0.000392612	461.012	72.1793	72.2205	413.748	7.56418	8.63475	421.014	15.7206	16.2867	418.42	15.7074	17.0007	89.7478			June 24, 2016	416.865	Wtd Mean (from internal errs)
Temora	2016	JN24B379	ok	0.00110137	12344.9	110.293	0.457235	15.0593	0.143533	0.0559435	0.00100793	0.511986	0.0104356	0.0664043	0.000632914	0.467615	0.0208259	0.000476113	449.159	80.0486	80.0839	414.456	7.90055	8.93422	419.784	17.1126	17.631	416.615	19.0489	20.1196	92.2738				3.54488	2-sigma err. of mean
Temora	2016	JN24B422	ok	0.00140465	14498.3	127.07	0.489907	15.0111	0.144816	0.0562205	0.00106608	0.516171	0.0109818	0.0666172	0.000642675	0.453447	0.0207212	0.000422596	460.123	84.09	84.1252	415.743	8.02158	9.0474	422.59	17.9816	18.4822	414.541	16.9086	18.0948	90.3549				0.77439	MSWD
Temora	2016	JN24B279	ok	0.00104897	17472	151.388	0.405538	14.8937	0.136818	0.0560114	0.00096952	0.518305	0.0101567	0.0671424	0.000616791	0.468786	0.0207976	0.000405971	451.852	76.8692	76.9064	418.916	7.69659	8.77586	424.018	16.6181	17.1621	416.055	16.2428	17.483	92.711
Temora	2016	JN24B337	ok	0.000910475	11460.8	97.3563	0.345338	14.7662	0.149555	0.055986	0.00112583	0.522543	0.0117654	0.0677221	0.0006859	0.449826	0.0216839	0.000592027	450.849	89.3183	89.3502	422.417	8.55662	9.5547	426.849	19.2216	19.7001	433.597	23.6766	24.6172	93.6938
Temora	2016	JN09A007	ok	0.000297493	4618.22	100.965	0.499134	15.2222	0.213964	0.0551877	0.00188916	0.499662	0.0184901	0.0656935	0.000923392	0.379841	0.0199549	0.000677828	418.863	152.894	152.91	410.158	11.5304	12.2472	411.474	30.4533	30.7361	399.361	27.131	27.8321	97.9218			June 9, 2016	414.243	Wtd Mean (from internal errs)
Temora	2016	JN09A097	ok	0.00110619	8090.4	168.461	0.511197	15.1484	0.174554	0.0558891	0.00141373	0.508478	0.0141337	0.0660135	0.000760667	0.414551	0.0199324	0.000476256	446.998	112.428	112.453	412.093	9.49703	10.3633	417.425	23.2056	23.5862	398.916	19.063	20.0462	92.1913				4.66198	2-sigma err. of mean
Temora	2016	JN09A175	ok	0.000353149	9351.29	199.14	0.656751	15.0394	0.157578	0.0553516	0.00133023	0.507239	0.0132984	0.0664921	0.000696685	0.399651	0.0207691	0.000473429	425.481	107.216	107.239	414.987	8.69623	9.64731	416.591	21.8436	22.246	415.49	18.9421	20.0128	97.5337				0.325258	MSWD
Temora	2016	JN09A316	ok	-0.00177188	6102.13	131.095	0.56855	14.948	0.181031	0.0536936	0.00147624	0.495052	0.0148728	0.0668984	0.000810185	0.403113	0.0207771	0.00060362	357.237	124.136	124.15	417.443	10.111	10.9492	408.347	24.5358	24.8807	415.648	24.151	25.0003	116.853
Temora	2016	JN09A343	ok	0.000875516	2190.17	47.9339	0.2667	14.9534	0.2702	0.055831	0.00258139	0.514575	0.0255441	0.0668746	0.00120839	0.364002	0.0200448	0.00130594	444.688	205.584	205.597	417.298	15.0808	15.6547	421.521	41.8496	42.066	401.142	52.2696	52.6402	93.8406
Temora	2016	JN08C510	ok	-0.000949966	12247.3	103.28	0.483594	15.2301	0.142935	0.0541742	0.00112627	0.490232	0.0111822	0.0656594	0.000616217	0.411446	0.0199422	0.000455807	377.319	93.5351	93.5564	409.952	7.69484	8.73132	405.069	18.4792	18.9275	399.11	18.2444	19.2703	108.649			June 8, 2016	415.395	Wtd Mean (from internal errs)
Temora	2016	JN08C355	ok	6.65483e-05	9372.9	81.5426	0.358325	15.0934	0.168335	0.0550844	0.00117614	0.502983	0.0121164	0.0662541	0.000738923	0.462986	0.019685	0.000558917	414.677	95.4359	95.4611	413.548	9.22449	10.1201	413.72	19.9322	20.3663	394.011	22.3744	23.1975	99.7278				3.72045	2-sigma err. of mean
Temora	2016	JN08C410	ok	0.00238815	8414.46	71.4575	0.378417	14.9878	0.180503	0.0570313	0.00129597	0.52443	0.0134873	0.0667208	0.000803542	0.468284	0.0211556	0.000537519	491.785	100.222	100.256	416.369	10.029	10.8693	428.106	22.0201	22.4414	423.141	21.5023	22.4857	84.6649				0.904001	MSWD
Temora	2016	JN08C481	ok	0.00236868	9582.02	81.0363	0.428471	14.9569	0.159257	0.0570363	0.00123756	0.525561	0.0127026	0.0668589	0.000711896	0.440543	0.0213617	0.000490374	491.976	95.6932	95.7286	417.204	8.88455	9.82691	428.859	20.7307	21.1792	427.221	19.6143	20.708	84.8017
Temora	2016	JN08C333	ok	-0.00162147	22964.4	194.382	0.273845	14.8813	0.122488	0.0538598	0.000736871	0.49881	0.00796421	0.0671983	0.000553107	0.515518	0.0202722	0.000412038	364.212	61.6958	61.7259	419.254	6.90174	8.08954	410.897	13.1211	13.763	405.648	16.4898	17.6543	115.113
Temora	2014	MA13A096	ok	-0.0019525	5882.11	158.009	0.26248	15.3204	0.264438	0.0533065	0.00162164	0.479536	0.0167726	0.0652723	0.00112663	0.493486	0.0211365	0.000644639	340.88	137.752	137.763	407.61	14.0711	14.657	397.755	27.8242	28.1133	422.763	25.7876	26.6117	119.576	0.99134		March 13, 2016	414.86	Wtd Mean (from internal errs)
Temora	2014	MA13A227	ok	0.00241867	4528.44	124.381	0.501367	15.104	0.269926	0.0569792	0.00187591	0.519921	0.0194764	0.0662077	0.00118321	0.477069	0.0198393	0.000525139	489.77	145.253	145.276	413.268	14.7712	15.3456	425.099	31.8487	32.1374	397.071	21.0206	21.908	84.38	0.991382			6.21241	2-sigma err. of mean
Temora	2014	MA13A154	ok	0.000216128	2909.11	79.9802	0.327062	15.0682	0.302288	0.0552218	0.00232572	0.505082	0.023562	0.066365	0.00133137	0.430041	0.020981	0.000760426	420.244	188.064	188.077	414.219	16.6196	17.1345	415.137	38.7322	38.9589	419.685	30.4218	31.1134	98.5662	0.996873			0.521974	MSWD
Temora	2014	MA13A004	ok	-0.00092498	5896.9	153.599	0.472039	15.0589	0.276618	0.0543052	0.00182967	0.497004	0.0190723	0.0664058	0.00121981	0.478679	0.0207708	0.000493646	382.751	151.44	151.454	414.465	15.2267	15.7878	409.672	31.4419	31.7135	415.524	19.7509	20.7802	108.286	1.01677
Temora	2014	MA13A023	ok	0.00328806	2826.13	77.1892	0.29401	14.9909	0.317599	0.057757	0.00278533	0.530993	0.0279693	0.0667071	0.00141326	0.402215	0.0214405	0.000850114	519.601	211.682	211.7	416.286	17.639	18.1298	432.469	45.5592	45.7686	428.779	34.0022	34.6492	80.1165	0.97878
Temora	2014	MA13A060	ok	0.00180305	6313.07	166.105	0.380773	14.7339	0.242995	0.0567304	0.00176232	0.530653	0.0186637	0.0678708	0.00111934	0.468914	0.0201654	0.000534655	480.107	137.284	137.308	423.315	13.9628	14.5984	432.243	30.405	30.7174	403.532	21.3981	22.2985	88.1709	0.993562
QingHu	2016	MY25B2187	ok	0.0126084	27449.1	536.748	0.45535	39.6114	0.296582	0.0593164	0.000705547	0.20638	0.00290066	0.0252453	0.000189019	0.532715	0.00945228	0.00015421	577.781	51.6985	51.7888	160.721	2.40674	2.89987	190.51	5.35523	5.69105	190.154	6.20456	6.87263	27.817
QingHu	2016	MY25B2057	ok	0.00243758	45978.8	1028.8	0.68648	39.757	0.382397	0.051199	0.000519045	0.177484	0.00248026	0.0251528	0.000241929	0.688277	0.00784899	0.000115423	248.798	46.6692	46.6877	160.14	3.08056	3.47675	165.894	4.63657	4.93058	158.026	4.64771	5.25689	64.3654
QingHu	2016	MY25B2035	ok	-0.00109285	28234.1	560.072	0.595311	39.7698	0.307584	0.0483847	0.000702842	0.167674	0.00275938	0.0251447	0.000194472	0.469966	0.00788721	0.000122649	117.094	68.505	68.5078	160.089	2.47629	2.95437	157.399	5.18054	5.41943	158.793	4.93855	5.52101	136.719
QingHu	2016	MY25B2387	ok	0.000108483	61431.2	1347.96	0.574867	39.7325	0.44837	0.0493451	0.000438564	0.171163	0.00245866	0.0251683	0.000284017	0.785603	0.00828932	0.000116048	163.243	41.5581	41.5671	160.237	3.61646	3.95979	160.428	4.6089	4.88595	166.855	4.67183	5.34347	98.1588
QingHu	2016	JN24B260	ok	-0.000529696	50456.6	1192.81	0.589209	39.8274	0.350993	0.0488286	0.000519329	0.168968	0.00233388	0.0251084	0.000221276	0.638034	0.00827633	0.000119013	138.588	49.9586	49.964	159.86	2.81765	3.24469	158.523	4.37921	4.66326	166.595	4.79124	5.44625	115.35
QingHu	2016	JN24B315	ok	0.00133778	48887.9	1164.99	0.623359	39.7265	0.339215	0.0503252	0.000556602	0.174589	0.00243948	0.0251721	0.000214939	0.611103	0.00805047	0.000115451	209.031	51.2841	51.296	160.261	2.73686	3.17684	163.394	4.56611	4.85573	162.067	4.64836	5.28709	76.6685
QingHu	2016	JN24B423	ok	-0.000532994	50954.1	1173.49	0.604504	39.7747	0.321027	0.0488304	0.000546157	0.169198	0.00233372	0.0251416	0.000202921	0.585168	0.00801358	0.000118503	138.673	52.5367	52.5418	160.069	2.58388	3.04501	158.723	4.37848	4.66326	161.327	4.77133	5.39017	115.43
QingHu	2016	JN24B358	ok	0.00200953	30351.2	709.582	0.536913	39.1754	0.327335	0.0509076	0.000738188	0.179094	0.00299726	0.0255263	0.000213288	0.499271	0.00800748	0.000131345	235.644	66.9124	66.924	162.488	2.71538	3.16985	167.281	5.59912	5.84895	161.204	5.28839	5.852	68.9547
QingHu	2016	JN09A006	ok	-0.000212688	13930.4	791.577	0.545132	39.6088	0.402973	0.0490996	0.00108276	0.170843	0.00414911	0.0252469	0.000256858	0.418917	0.00808681	0.000171121	151.568	103.337	103.34	160.732	3.27051	3.64875	160.151	7.77884	7.94556	162.795	6.88967	7.33967	106.046
QingHu	2016	JN09A051	ok	-0.000957462	10246.8	493.837	0.46234	39.4023	0.549895	0.0485236	0.00133937	0.169724	0.00524957	0.0253792	0.00035419	0.451208	0.00783067	0.00024222	123.848	130.01	130.012	161.563	4.50952	4.79376	159.179	9.84685	9.97749	157.659	9.75349	10.0566	130.453
QingHu	2016	JN09A315	ok	-0.000346007	6731	381.518	0.44959	39.237	0.494396	0.049025	0.00161775	0.1722	0.00608251	0.0254861	0.000321132	0.356722	0.008594	0.000295131	148.006	154.732	154.734	162.235	4.08842	4.40244	161.327	11.3969	11.513	172.962	11.8795	12.18	109.614
QingHu	2016	JN09A344	ok	0.00277237	33022.7	1918.96	0.0457256	40.2658	0.343051	0.0514235	0.000690813	0.17601	0.0027999	0.024835	0.000211586	0.535572	0.00965977	0.000325073	258.858	61.7301	61.7453	158.141	2.69461	3.1296	164.621	5.23746	5.49553	194.308	13.0779	13.4221	61.0917
QingHu	2016	JN08C392	ok	0.000776384	26733.2	597.636	0.446183	40.2232	0.324139	0.0498366	0.000689941	0.170759	0.00273533	0.0248613	0.000200344	0.50307	0.00773894	0.000130374	186.367	64.4593	64.4669	158.306	2.55142	3.00808	160.077	5.12845	5.37774	155.819	5.25	5.78176	84.9434
QingHu	2016	JN08C335	ok	0.000516416	54624.1	1250.29	0.494181	40.2097	0.276517	0.0496306	0.000503362	0.17011	0.0020845	0.0248696	0.000171025	0.561204	0.00775491	0.000106048	176.714	47.3067	47.3159	158.359	2.17803	2.69894	159.515	3.90932	4.22889	156.139	4.27041	4.9119	89.6132
QingHu	2016	JN08C512	ok	0.000282377	56184.6	1246.85	0.441655	40.059	0.285036	0.0494565	0.000461837	0.170151	0.00199761	0.0249632	0.000177623	0.606073	0.00783182	0.000113788	168.512	43.6226	43.6317	158.947	2.26195	2.77052	159.55	3.7463	4.07881	157.682	4.58188	5.19625	94.3237
QingHu	2016	JN08C458	ok	0.000482072	47101.1	1028.31	0.465911	39.8027	0.3045	0.0496369	0.000565188	0.171872	0.0023577	0.0251239	0.000192204	0.557688	0.0082201	0.000128287	177.011	53.1075	53.1158	159.958	2.44744	2.92951	161.042	4.41828	4.70871	165.467	5.16471	5.76971	90.3662
SP07-05	2015	JA30B314	ok	-0.000688539	23336.9	1020.28	1.17501	34.61	0.302235	0.0492051	0.000865254	0.195939	0.00384698	0.0288934	0.000252314	0.444778	0.00895819	0.000116901	156.597	82.3249	82.3291	183.619	3.20693	3.70134	181.684	7.13421	7.36688	180.259	4.70463	5.47579	117.255
SP07-05	2015	JA30B317	slightly older @ end	0.000322552	27842.4	1103.67	1.26218	34.393	0.377008	0.0500363	0.00101998	0.200506	0.00464076	0.0290757	0.000318721	0.473608	0.00907753	0.000117193	195.669	94.7524	94.758	184.761	4.05061	4.45709	185.555	8.5894	8.79187	182.649	4.7161	5.50473	94.4252
SP07-05	2015	JA30B318	common pb in middle	0.0397845	10755.8	710.319	1.13264	32.942	0.504112	0.0817127	0.00308967	0.341863	0.0139448	0.0303564	0.000464543	0.375159	0.0112671	0.000251455	1237.79	148.27	148.414	192.778	5.90017	6.21103	298.582	24.3588	24.5451	226.459	10.1081	10.7035	15.5744
SP07-05	2015	JA30B315	ok	-6.22563e-05	34649.5	1479.05	1.12841	34.2557	0.275202	0.0497448	0.000752321	0.200137	0.00342735	0.0291923	0.000234524	0.469126	0.00898172	0.000111633	182.074	70.4724	70.479	185.491	2.98038	3.51685	185.242	6.34454	6.61517	180.73	4.49255	5.29858	101.876
SP07-05	2015	JA30B316	ok	0.000655013	13386.7	588.265	0.909998	34.1903	0.342609	0.0503247	0.00117486	0.202857	0.00515364	0.0292481	0.000293084	0.394432	0.0091394	0.000144546	209.011	108.25	108.256	185.84	3.72448	4.16779	187.541	9.52906	9.71586	183.889	5.81667	6.48104	88.9144
SP07-05	2015	JA30B319	strongly reverse discordant	-0.00230104	32392.7	1408.5	1.47479	34.257	0.273209	0.0479581	0.000723513	0.192941	0.00329248	0.0291911	0.000232807	0.467356	0.00897906	0.000107139	96.1729	71.4245	71.4263	185.484	2.95857	3.49835	179.136	6.11379	6.37639	180.677	4.3117	5.14568	192.865
SP07-05	2015	JA16A020	slightly older @ very end	0.00056777	18062.6	735.928	0.884395	35.0412	0.373889	0.0501599	0.000891189	0.197283	0.00408863	0.0285378	0.000304498	0.514843	0.00902073	0.000132542	201.401	82.4976	82.5045	181.391	3.87086	4.27981	182.825	7.57797	7.80013	181.512	5.3339	6.03414	90.0644
SP07-05	2015	JA16A019	ok	0.000332286	21091.8	885.827	1.11753	34.9256	0.334631	0.0499847	0.000762255	0.197245	0.00355235	0.0286323	0.000274332	0.531999	0.00879947	0.000115775	193.27	70.9148	70.9222	181.982	3.48723	3.93901	182.792	6.58412	6.83855	177.079	4.65969	5.41193	94.1598
SP07-05	2015	JA16A021	ok	-0.000251095	21209.5	876.632	1.13037	34.8323	0.324088	0.0495295	0.000870782	0.195972	0.00389813	0.028709	0.000267115	0.467754	0.00888721	0.000112472	171.957	82.076	82.0811	182.463	3.39536	3.8602	181.712	7.22897	7.45875	178.837	4.52655	5.31198	106.11
SP07-05	2015	JA16A018	ok	0.000130565	20080.2	855.587	1.22517	34.7409	0.345512	0.0498441	0.000896562	0.197736	0.0040642	0.0287845	0.000286273	0.483874	0.00884322	0.00011963	186.718	83.7454	83.7512	182.936	3.63875	4.07808	183.208	7.53122	7.75564	177.955	4.81472	5.55275	97.9749
SP07-05	2015	JA16A017	ok	-0.000362874	29985.4	1236.26	1.41266	34.646	0.317681	0.049461	0.000736172	0.196753	0.00343957	0.0288634	0.000264659	0.524514	0.0089081	0.000109115	168.724	69.5257	69.5314	183.431	3.36389	3.83723	182.375	6.37644	6.63766	179.255	4.39138	5.20076	108.717
SP07-05	2015	JA16A022	reverse discordant	-0.000999378	46719.8	1805.63	1.27936	34.0248	0.309616	0.0490235	0.000641113	0.198573	0.00316368	0.0293903	0.000267444	0.571158	0.00909946	0.000113762	147.934	61.3228	61.3278	186.731	3.39841	3.88349	183.918	5.86039	6.14829	183.089	4.57799	5.39047	126.226
SP07-05	2014	DE18A019	older @ end	-0.000386376	82444	3841.8	2.04646	34.9699	0.345285	0.0494065	0.000538302	0.194716	0.00286306	0.0285961	0.000282351	0.671514	0.00868638	0.000102466	166.149	50.9186	50.9262	181.755	3.58923	4.02854	180.645	5.31234	5.6175	174.813	4.12423	4.93892	109.393
SP07-05	2014	DE18A015	ok	-0.000462267	35347.3	1779.32	1.32821	34.9363	0.326155	0.0493496	0.000630222	0.194679	0.00307963	0.0286235	0.00026722	0.590155	0.00918105	0.000111535	163.456	59.7117	59.7179	181.927	3.39684	3.85895	180.614	5.71427	5.99892	184.723	4.48816	5.32804	111.301
SP07-05	2014	DE18A017	ok	0.0015828	21953.9	1103.01	1.30658	34.8526	0.345551	0.0509905	0.000851777	0.201635	0.00391683	0.0286922	0.000284473	0.510397	0.00892891	0.000114168	239.396	77.0306	77.041	182.358	3.61603	4.05519	186.509	7.246	7.48732	179.672	4.59471	5.37691	76.1743
SP07-05	2014	DE18A016	ok	-0.000263739	6227.13	311.149	0.789614	34.8149	0.474034	0.0495213	0.00170603	0.196037	0.00726193	0.0287233	0.000391092	0.367563	0.00897071	0.000182045	171.572	160.841	160.843	182.553	4.97122	5.29991	181.768	13.4667	13.5915	180.51	7.32625	7.84517	106.4
SP07-05	2014	DE18A020	Slightly older @ end	0.00116708	29783.1	1405.65	0.985224	34.6692	0.358376	0.0506791	0.000928774	0.201464	0.00423897	0.028844	0.000298161	0.491284	0.00901853	0.000121702	225.257	84.7269	84.7353	183.309	3.78975	4.215	186.364	7.84251	8.06566	181.468	4.89769	5.65189	81.3779
SP07-05	2014	DE18A021	ok	-0.000380084	25503.3	1295	1.4105	34.6853	0.346124	0.0494429	0.000766355	0.196459	0.00362158	0.0288307	0.000287702	0.541327	0.00904638	0.000112293	167.868	72.4142	72.4196	183.226	3.65682	4.09553	182.125	6.71471	6.96259	182.025	4.51896	5.33165	109.149
SP07-05	2014	DE18A018	ok	-0.000313753	18251.3	893.755	1.16867	34.506	0.355121	0.0495158	0.000977654	0.19777	0.00440346	0.0289804	0.000298254	0.46222	0.00931752	0.000131125	171.312	92.1857	92.1901	184.164	3.79067	4.21961	183.238	8.15977	8.36742	187.456	5.27613	6.02725	107.502
SP07-05	2014	DE13B241	ok	0.00283928	10564.7	633.261	0.955621	35.2404	0.420256	0.0519505	0.00125703	0.203171	0.0054807	0.0283765	0.000338401	0.442077	0.00868434	0.000131461	282.237	110.72	110.73	180.38	4.30219	4.66958	187.806	10.1324	10.3088	174.772	5.2913	5.94794	63.9106
SP07-05	2014	DE13B249	ok	-0.00099409	24513.5	1454.43	1.17216	35.0011	0.345352	0.0489182	0.000811341	0.19262	0.00371731	0.0285705	0.000281902	0.511272	0.00874667	0.000115502	142.891	77.8447	77.8484	181.596	3.58356	4.02277	178.862	6.90361	7.13651	176.021	4.64882	5.39421	127.087
SP07-05	2014	DE13B250	ok	0.00236684	35210	2112.17	1.1712	34.8546	0.305389	0.0516158	0.000687879	0.204096	0.00325516	0.0286906	0.000251382	0.549359	0.0088824	0.000111398	267.43	61.1442	61.1606	182.348	3.1954	3.68498	188.586	6.01559	6.3105	178.74	4.48331	5.27439	68.1854
SP07-05	2014	DE13B242	ok	0.000325221	16788.4	992.345	1.02594	34.869	0.33994	0.0499853	0.000909029	0.197568	0.00407666	0.0286788	0.000279592	0.47247	0.00895648	0.000121067	193.297	84.5682	84.5744	182.274	3.554	3.99959	183.066	7.55485	7.77825	180.224	4.87227	5.62021	94.2972
SP07-05	2014	DE13B247	ok	-0.000690016	27505.2	1676.5	1.55292	34.8966	0.313856	0.0491722	0.000679686	0.1942	0.00320255	0.0286561	0.000257729	0.545381	0.00876403	0.000111112	155.032	64.7309	64.7361	182.132	3.27614	3.75414	180.206	5.94357	6.21652	176.369	4.47209	5.24549	117.48
SP07-05	2014	DE13B243	ok	0.000104079	27600.3	1668.52	1.34906	34.8111	0.309693	0.0498152	0.00067635	0.197223	0.00320136	0.0287265	0.000255561	0.548069	0.0088156	0.000113291	185.367	63.2283	63.2359	182.573	3.24847	3.7322	182.773	5.93364	6.2147	177.402	4.55968	5.32866	98.4924
SP07-05	2014	DE13B244	ok	-0.000181177	23024.1	1376.87	1.08988	34.7774	0.321742	0.0495913	0.000828789	0.196527	0.00375408	0.0287543	0.00026602	0.484315	0.00885557	0.000119407	174.869	77.9788	77.9842	182.747	3.38136	3.84927	182.183	6.96018	7.19976	178.203	4.80573	5.54688	104.505
SP07-05	2014	DE13B240	ok	0.00182525	14618.9	860.415	0.898641	34.6488	0.369251	0.0512066	0.000983113	0.20368	0.00447249	0.028861	0.00030757	0.485325	0.00897182	0.000128547	249.139	88.3767	88.3865	183.416	3.90931	4.32327	188.236	8.2667	8.48292	180.532	5.17328	5.88536	73.6199
SP07-05	2014	DE13B245	slightly older in middle	0.000235524	52395.3	2923.35	1.38849	34.5388	0.343711	0.0499504	0.000860176	0.199317	0.00396425	0.0289529	0.000288124	0.500344	0.0088559	0.000114637	191.675	80.103	80.1094	183.992	3.66197	4.10359	184.548	7.34103	7.57441	178.21	4.61375	5.38145	95.9917
SP07-05	2014	DE13B248	ok	-0.00099683	40261	2405.18	1.30714	34.1543	0.271751	0.0490106	0.000627215	0.197768	0.00298023	0.0292789	0.000232959	0.527998	0.00906835	0.000111807	147.319	60.0161	60.0211	186.033	2.96038	3.50283	183.236	5.52248	5.82491	182.465	4.49935	5.31868	126.28
SP07-05	2014	MA13A195	ok	-0.000162041	9687.48	597.064	1.13553	34.5199	0.534891	0.0496353	0.00130123	0.198168	0.00603477	0.0289688	0.000448877	0.508826	0.00905921	0.000146925	176.936	122.275	122.279	184.091	5.70506	5.9984	183.575	11.1807	11.3337	182.282	5.91263	6.55647	104.044	1.02758
SP07-05	2014	MA13A198	ok	0.000685221	15686.9	979.245	1.05448	34.1895	0.483729	0.0503489	0.00104576	0.202959	0.00510063	0.0292487	0.000413824	0.562981	0.00906025	0.00013643	210.125	96.2894	96.2958	185.845	5.25882	5.58159	187.627	9.43063	9.61951	182.303	5.49029	6.17845	88.4449	1.02009
SP07-05	2014	MA13A199	ok	0.0240613	3876.61	237.451	0.71834	33.3332	0.628071	0.0691097	0.0026046	0.285742	0.0120399	0.0300001	0.000565267	0.44718	0.0107375	0.00026289	901.12	155.429	155.502	190.549	7.18071	7.43242	255.202	21.5062	21.6604	215.872	10.5705	11.0903	21.1458	1.02747
SP07-05	2014	MA13A197	ok	0.00442169	14533.8	893.139	1.04657	33.9698	0.504035	0.0533563	0.00118621	0.216474	0.00578601	0.0294379	0.000436792	0.555129	0.00923961	0.000138132	342.996	100.631	100.648	187.029	5.55019	5.86074	198.971	10.6364	10.8249	185.896	5.55827	6.2645	54.5282	1.01295
SP07-05	2014	MA13A201	ok	-0.00101353	20272.6	1266.19	1.46081	33.9894	0.475174	0.0490163	0.000850776	0.198751	0.00442955	0.0294209	0.000411306	0.627276	0.00916099	0.000120085	147.59	81.3944	81.3981	186.923	5.22639	5.5547	184.069	8.20465	8.41304	184.321	4.83227	5.61778	126.65	1.05055
SP07-05	2014	MA13A196	ok	0.000517895	30311	1858.26	1.31514	33.2472	0.434779	0.0503267	0.000796397	0.20862	0.0042827	0.0300777	0.000393332	0.637019	0.00911964	0.000123098	209.102	73.3752	73.3835	191.035	4.99639	5.3536	192.394	7.89921	8.13516	183.493	4.95364	5.71608	91.3598	1.08304
SP07-05	2014	MA13A200	avoided common Pb	0.00150316	17709.3	976.319	1.02213	32.6958	0.60413	0.0511816	0.00186495	0.215742	0.00881414	0.030585	0.000565128	0.452265	0.0094692	0.000164963	248.015	167.765	167.771	194.208	7.17689	7.43833	198.36	16.208	16.3316	190.493	6.63715	7.26769	78.305	1.03045
SP07-05	2014	MA13A216	ok	0.00181606	11545.2	731.099	1.03007	34.8126	0.512665	0.051181	0.00120321	0.202621	0.00562081	0.0287252	0.00042302	0.530864	0.00895009	0.000143708	247.989	108.239	108.247	182.565	5.37706	5.68236	187.342	10.3939	10.565	180.096	5.78346	6.42535	73.6181	1.03664
SP07-05	2014	MA13A218	ok	-0.000283603	16350.1	1037.82	1.18703	34.2667	0.4875	0.0495669	0.00107144	0.199357	0.00515889	0.0291828	0.000415174	0.549766	0.00915291	0.000135594	173.721	100.88	100.885	185.432	5.27614	5.59652	184.582	9.5531	9.73366	184.159	5.45639	6.16169	106.741	1.03887
SP07-05	2014	MA13A215	ok	-0.000523213	8801.92	545.707	1.0017	33.8931	0.542808	0.0494188	0.00132039	0.200952	0.00625979	0.0295045	0.000472524	0.514125	0.00911812	0.0001595	166.731	124.852	124.856	187.447	6.00402	6.29347	185.932	11.5838	11.7353	183.462	6.4185	7.0235	112.424	1.01306
SP07-05	2014	MA13A213	ok	-0.000901406	25487.4	1605.82	1.28935	33.4264	0.453755	0.0491721	0.000756607	0.202741	0.00416005	0.0299165	0.000406109	0.661569	0.00916904	0.000124011	155.027	72.0568	72.0615	190.026	5.1591	5.50222	187.443	7.6923	7.92229	184.482	4.99023	5.75547	122.576	1.06614
SP07-05	2014	MA13A214	ok	0.000988994	34957.5	1996.52	1.48333	33.1701	0.468477	0.0507122	0.00102125	0.210706	0.00518278	0.0301476	0.000425789	0.574191	0.00923793	0.000127451	226.763	93.0771	93.0849	191.472	5.4085	5.74159	194.145	9.55085	9.75045	185.862	5.12848	5.88624	84.4371	1.08872
1 concentration uncertainty c.10%
2 data not corrected for common-Pb
3 data not corrected for common-Pb
4 Concordance calculated as (206Pb-238U age/207Pb-206Pb age)*100
Decay constants of Jaffey et al. (1971) used for 235U and 238U, while 232Th decay constants are from Amelin & Zaitsev 2002.
bd = below detection; NA = not available
Uncertainties quoted without components related to systematic error unless otherwise stated
Total systematic uncertainties (ssys): 206Pb/238U = 1.01%, 207Pb/206Pb = 0.28%, 207Pb/235U= 1.05%, and 208Pb/232Th = 2.42% (2s)
										9.5
										29	14.5	6274.94

## Sheet: 5ns_Pulse_Width Laser
2015, Dept. E.Sci, Uni. of Tasmania								Data for Tera-Wasserburg plot2					Data for Wetherill plot3									Dates3										Ablation rate relative to average of primary standard (91500)
Identifier	Year	File number	Comments	f206c	206Pb cps	Uppm1	Th/U	238U/206Pb	1s	207Pb/206Pb	1s	207Pb/235U	1s	206Pb/238U	1s	Rho	208Pb/232Th	1s	207Pb/206Pb	2s	2ssys	206Pb/238U	2s	2ssys	207Pb/235U	2s	2ssys	208Pb/232Th	2s	2ssys	% conc4
	Analysed								abs		abs		abs		abs			abs		abs	abs		abs	abs		abs	abs		abs	abs
91500	2015	AP30C005	ok	-0.00219391	8865.71	98.853	0.361172	5.53664	0.0675668	0.0732227	0.00195331	1.82269	0.0534688	0.180615	0.00220415	0.416005	0.0597539	0.00205386	1019.24	108.034	108.168	1070.33	26.1238	28.2579	1053.65	61.8181	62.7292	1173.05	80.64	82.6758	105.013	1.01885								91500 - errors from TIMS in Horstwood et al. 2016 and Wiedenbeck 1995 (208Pb/232Th age only). NIST610 errors for 7/6Pb ratios are from Baker et al. 2004. All 2 sigma
91500	2015	AP30C006	ok	0.00203027	8534.21	94.6201	0.36433	5.52075	0.0816448	0.0768756	0.00175109	1.91912	0.0521194	0.181135	0.00267875	0.544545	0.0528285	0.00206494	1117.1	90.9046	91.0966	1073.17	31.7416	33.5291	1087.76	59.0827	60.0975	1040.53	81.3439	82.9363	96.0678	1.00573	Systematic Errors:							76 error %	206/238 error %	207/235 error%	208/232 error %
91500	2015	AP30C009	ok	0.00212558	8932.23	101.108	0.360231	5.59759	0.0693359	0.0764481	0.00169238	1.88225	0.0477478	0.178648	0.00221286	0.488293	0.0604449	0.00202082	1105.96	88.4941	88.6874	1059.59	26.2496	28.3333	1074.86	54.5326	55.6048	1186.23	79.317	81.432	95.8069	1.03446	1) Uncertaintly in Primary Ref. Material.							0.00549535	0.04	0.06	0.26465
91500	2015	AP30C025	ok	0.000481311	8398.68	93.786	0.361887	5.5631	0.0763475	0.0752937	0.00175693	1.86532	0.0504962	0.179756	0.00246696	0.50696	0.0544645	0.00193488	1075.48	93.7027	93.8753	1065.64	29.2495	31.1541	1068.87	57.8711	58.8713	1071.92	76.1606	77.9619	99.0854	1.00962	2) Long Term variance in secondary stds.							0.5	1	1	1.5
91500	2015	AP30C026	ok	0.00260286	8202.63	93.2939	0.359692	5.59459	0.0751838	0.0768681	0.00173931	1.89361	0.0498343	0.178744	0.00240209	0.510645	0.0550026	0.00181278	1116.9	90.3046	90.4978	1060.11	28.493	30.4253	1078.85	56.7843	57.8223	1082.23	71.3362	73.2928	94.9152		3)Decay constant errors							0.173046	0.107	0.136	0.31		Decay constant errors from Jaffey et al. 1971 and Amelin and Zaitsev 2002 (232Th)
91500	2015	AP30C090	ok	0.00029004	8068.75	93.9661	0.362045	5.60281	0.06901	0.0748742	0.00169675	1.84178	0.047504	0.178482	0.00219836	0.477545	0.0523887	0.00186136	1064.25	91.1533	91.3271	1058.68	26.0795	28.1723	1060.5	54.7056	55.7463	1032.09	73.3396	75.0738	99.4761	0.974167	4) Model common Pb uncertainty							No correction applied	No correction applied	No correction applied	No correction applied
91500	2015	AP30C091	ok	0.00192964	8559.75	98.7679	0.366465	5.53831	0.069276	0.0766737	0.00176984	1.90801	0.050093	0.18056	0.00225854	0.476441	0.0513111	0.00160109	1111.85	92.1916	92.3791	1070.04	26.7691	28.8544	1083.89	56.913	57.9584	1011.38	63.1173	65.0457	96.2397	0.957167	Total systematic uncertainty							0.279975	1.01305	1.0221	2.41614
91500	2015	AP30C003	ok	0.00132902	7215.11	80.4398	0.366645	5.59916	0.0808566	0.0757696	0.00199495	1.86502	0.0560055	0.178598	0.00257911	0.480891	0.054088	0.00191278	1088.12	105.529	105.686	1059.31	30.5947	32.3993	1068.77	64.1888	65.0919	1064.7	75.3046	77.1017	97.3528
91500	2015	AP30C004	ok	-0.00361092	7323.61	81.1789	0.360359	5.49011	0.0743899	0.0723445	0.0020739	1.81609	0.0575844	0.182146	0.00246804	0.427331	0.057661	0.00207204	994.763	116.529	116.648	1078.69	29.2319	31.183	1051.27	66.6675	67.5094	1133.1	81.4351	83.318	108.437
91500	2015	AP30C014	ok	-0.00449886	7986.48	90.3777	0.358747	5.58443	0.0782573	0.0709747	0.00164958	1.75161	0.047538	0.179069	0.00250938	0.516346	0.0537541	0.00214027	955.794	95.0425	95.1769	1061.89	29.7615	31.6224	1027.76	55.7859	56.7453	1058.29	84.2738	85.8643	111.1
91500	2015	AP30C015	ok	0.00185141	7517.32	87.6045	0.35945	5.62825	0.0906857	0.0760205	0.00210945	1.86153	0.0597314	0.177675	0.00286281	0.502149	0.0585903	0.00233044	1094.74	111.108	111.259	1054.26	33.9738	35.5924	1067.53	68.5082	69.3531	1150.85	91.5504	93.2817	96.3027
91500	2015	AP30C022	ok	0.00190764	7110.32	80.8897	0.35886	5.57943	0.0759672	0.0763836	0.00200696	1.88679	0.0558356	0.17923	0.00244032	0.460095	0.0576598	0.00213153	1104.27	105.058	105.221	1062.77	28.9403	30.8539	1076.45	63.7108	64.6336	1133.07	83.7734	85.6048	96.2412
91500	2015	AP30C023	ok	-0.00674032	6112.68	68.6014	0.366884	5.57431	0.0828646	0.0691592	0.00178457	1.7099	0.05092	0.179394	0.00266678	0.499184	0.0567682	0.00224434	902.595	106.393	106.501	1063.66	31.6237	33.3867	1012.25	60.2885	61.1509	1116.03	88.2444	89.9334	117.845
91500	2015	AP30C027	ok	-0.00281589	6666.45	74.7434	0.363517	5.57032	0.0783101	0.0724789	0.00216277	1.79326	0.0591524	0.179523	0.00252382	0.426196	0.0534075	0.00215695	998.535	121.227	121.343	1064.37	29.9268	31.7864	1043.01	68.8093	69.6126	1051.65	84.9447	86.5033	106.593
91500	2015	AP30C028	ok	-0.00144157	6779.55	76.284	0.360405	5.59197	0.080481	0.0734914	0.00211546	1.81127	0.0582914	0.178828	0.00257373	0.447206	0.049538	0.00192503	1026.65	116.443	116.57	1060.57	30.5279	32.3404	1049.54	67.5536	68.3819	977.263	75.9522	77.4564	103.303
91500	2015	AP30C039	ok	-0.00262367	7639.19	87.7829	0.358122	5.57723	0.0721794	0.0725951	0.00184871	1.79391	0.0512446	0.1793	0.00232047	0.453052	0.0555083	0.00202229	1001.79	103.406	103.542	1063.15	27.5182	29.5255	1043.25	59.6025	60.5285	1091.91	79.5617	81.3519	106.125
91500	2015	AP30C040	ok	0.000662222	7791.39	87.1409	0.357577	5.51119	0.0722713	0.0757911	0.00184949	1.89533	0.0525059	0.181449	0.00237944	0.473366	0.0571322	0.00213367	1088.69	97.7984	97.9679	1074.89	28.1911	30.1958	1079.45	59.8077	60.7952	1122.99	83.8784	85.6754	98.7323
91500	2015	AP30C041	ok	-0.00143903	6911.19	79.8188	0.362685	5.54287	0.0862906	0.0738152	0.00237511	1.83537	0.0656045	0.180412	0.00280862	0.43553	0.0513543	0.00232971	1035.54	129.987	130.102	1069.22	33.291	34.9873	1058.2	75.6501	76.4029	1012.21	91.8389	93.1769	103.253
91500	2015	AP30C042	ok	-0.000820582	6782.54	79.8533	0.362875	5.68846	0.0817672	0.0733999	0.00188995	1.77833	0.0524415	0.175794	0.00252691	0.487441	0.0569058	0.00207032	1024.13	104.2	104.34	1043.96	30.0122	31.7984	1037.57	61.1941	62.0866	1118.66	81.3969	83.2334	101.936
91500	2015	AP30C050	ok	-0.000860645	7697.19	88.1073	0.359084	5.56834	0.0734854	0.0741329	0.0021332	1.83484	0.058086	0.179587	0.00237001	0.416872	0.0516781	0.00205101	1044.21	116.095	116.227	1064.72	28.1022	30.0761	1058.01	66.9876	67.8363	1018.44	80.8398	82.3752	101.964
91500	2015	AP30C051	ok	-0.00149687	7328.58	84.4457	0.356495	5.52553	0.0727755	0.0738819	0.0020054	1.84279	0.0555971	0.180978	0.00238362	0.436551	0.0494227	0.00197735	1037.37	109.624	109.762	1072.32	28.2465	30.2382	1060.86	64.0123	64.9046	975.041	78.021	79.4794	103.369
91500	2015	AP30C054	ok	-0.0033922	6620.94	76.5802	0.36548	5.62209	0.0829117	0.0716612	0.00194074	1.7567	0.0541718	0.17787	0.00262313	0.478237	0.0508283	0.00180735	975.447	110.413	110.533	1055.33	31.1268	32.8893	1029.63	63.5021	64.3496	1002.1	71.2651	72.9476	108.189
91500	2015	AP30C055	ok	-0.00382235	6855.66	79.404	0.359238	5.56303	0.0780056	0.0716818	0.00177801	1.77587	0.0506002	0.179758	0.0025206	0.492122	0.0500884	0.00211145	976.033	101.116	101.248	1065.65	29.8855	31.752	1036.67	59.0761	59.9986	987.859	83.2853	84.689	109.182
91500	2015	AP30C056	ok	0.00196094	7434.36	85.1646	0.351605	5.62365	0.084191	0.0761418	0.00199882	1.86602	0.0563915	0.17782	0.00266213	0.495393	0.0519756	0.00199487	1097.93	105.064	105.224	1055.06	31.5902	33.3273	1069.12	64.6181	65.5159	1024.15	78.6157	80.2113	96.0951
91500	2015	AP30C061	ok	-0.00100697	6953.43	79.4989	0.363713	5.52906	0.0732596	0.0742697	0.00202323	1.85128	0.0560809	0.180862	0.00239641	0.437391	0.049266	0.00176159	1047.93	109.846	109.986	1071.68	28.3994	30.3789	1063.89	64.4567	65.3479	972.023	69.5129	71.1359	102.267
91500	2015	AP30C062	ok	-0.00205349	6998.13	80.759	0.360359	5.59818	0.0914011	0.0729378	0.00186167	1.79563	0.0544065	0.178629	0.00291647	0.538855	0.0520834	0.00212688	1011.34	103.492	103.63	1059.48	34.5962	36.2024	1043.87	63.2574	64.1316	1026.22	83.814	85.3184	104.76
91500	2015	AP30C079	ok	-0.00523997	5797.05	69.8371	0.364427	5.59999	0.0926115	0.0702525	0.00210441	1.72897	0.0591599	0.178572	0.00295319	0.483323	0.0542612	0.00223779	934.849	122.891	122.99	1059.17	35.0326	36.6188	1019.37	69.7591	70.5162	1068.02	88.0925	89.6431	113.298
91500	2015	AP30C080	ok	-0.000259497	5838.86	70.2221	0.370746	5.64201	0.087033	0.0741622	0.00189267	1.81159	0.0540228	0.177242	0.00273411	0.51729	0.0518828	0.00220364	1045.01	102.952	103.101	1051.89	32.4527	34.136	1049.65	62.6025	63.4956	1022.37	86.847	88.289	100.659
91500	2015	AP30C086	ok	0.00171529	6646.62	78.147	0.357761	5.58031	0.0811882	0.0762164	0.00202514	1.88236	0.0570231	0.179202	0.00260721	0.480271	0.0522151	0.00223055	1099.89	106.312	106.471	1062.61	30.92	32.7175	1074.89	65.1244	66.0248	1028.75	87.8935	89.3363	96.6106
91500	2015	AP30C100	ok	-0.00175894	6039.34	68.4337	0.374965	5.62369	0.0939564	0.0730211	0.00236193	1.78953	0.0651495	0.177819	0.00297087	0.458916	0.0512864	0.00237821	1013.66	131.106	131.215	1055.05	35.254	36.8186	1041.65	75.8447	76.5723	1010.9	93.7539	95.0615	104.084
91500	2015	AP30C120	ok	-0.000427625	5979.8	67.9955	0.372132	5.55692	0.0919657	0.0745714	0.00236801	1.84948	0.0662278	0.179956	0.00297823	0.46217	0.0510855	0.00237801	1056.1	127.888	128.01	1066.73	35.3084	36.9047	1063.25	76.1472	76.9021	1007.04	93.7548	95.0526	101.007
91500	2015	AP30C138	ok	-0.00287188	5956.76	69.0594	0.365922	5.56301	0.0839556	0.0724797	0.00240411	1.79564	0.0654356	0.179759	0.00271288	0.414138	0.0538595	0.00232465	998.558	134.753	134.857	1065.66	32.1653	33.9065	1043.88	76.0806	76.809	1060.32	91.5295	93.0016	106.72
91500	2015	AP30C158	ok	0.00614594	5904.18	69.7872	0.364631	5.66832	0.0821744	0.0793671	0.00257902	1.92974	0.068664	0.176419	0.00255757	0.407429	0.053613	0.00210788	1180.44	128.482	128.634	1047.38	30.3681	32.1458	1091.45	77.6719	78.4518	1055.59	83.0041	84.6103	88.7279
91500	2015	AP30C178	ok	0.000358453	5964.13	69.2788	0.366121	5.62038	0.0856456	0.0748185	0.0022583	1.83466	0.0620338	0.177924	0.00271127	0.450677	0.0561062	0.00230176	1062.75	121.438	121.569	1055.62	32.172	33.881	1057.95	71.5432	72.3383	1103.36	90.5309	92.1411	99.329
91500	2015	AP30C199	ok	-0.00348922	6014.31	68.856	0.36719	5.45797	0.083643	0.0726657	0.00223982	1.83489	0.0631626	0.183218	0.0028078	0.445194	0.0499893	0.00205972	1003.76	125.124	125.236	1084.53	33.2407	34.9872	1058.03	72.8414	73.6226	985.952	81.2488	82.6815	108.047
91500	2015	AP30C219	ok	0.00674658	6103.21	70.1678	0.365376	5.53489	0.0903446	0.0807407	0.00215218	2.01046	0.0628391	0.180672	0.00294906	0.522227	0.057985	0.0023439	1214.29	104.878	105.074	1070.65	34.9517	36.5752	1119.05	69.954	70.863	1139.28	92.1057	93.7927	88.1708
91500	2015	AP30C236	ok	0.00253864	5925.02	68.4804	0.36683	5.52124	0.103735	0.0772992	0.00267919	1.92953	0.0760713	0.181119	0.00340293	0.476562	0.0509526	0.00244439	1128.05	138.099	138.228	1073.08	40.323	41.7444	1091.38	86.0546	86.759	1004.49	96.3782	97.6347	95.127
91500	2015	AP30C245	ok	-0.000165362	5894.92	69.7425	0.365549	5.66136	0.0822916	0.0741187	0.00241099	1.80434	0.0642863	0.176636	0.00256752	0.407976	0.0573513	0.00223854	1043.82	131.246	131.362	1048.57	30.4833	32.2586	1047.03	74.6087	75.3559	1127.18	87.9919	89.7193	100.455
91500	2015	AP30C258	ok	0.000499764	5965.78	68.0953	0.365183	5.57281	0.0876876	0.0752454	0.00211755	1.86088	0.0599987	0.179443	0.00282352	0.488024	0.0543868	0.00257455	1074.19	113.03	113.172	1063.93	33.4817	35.1525	1067.3	68.8239	69.6646	1070.43	101.343	102.7	99.0448
91500	2015	AP30C259	ok	-0.00435564	5878.26	67.5617	0.374658	5.5241	0.0831654	0.071491	0.00211136	1.78362	0.0591254	0.181025	0.00272533	0.454159	0.0557846	0.00238756	970.597	120.495	120.605	1072.57	32.2951	34.0517	1039.5	68.9171	69.7138	1097.2	93.9198	95.4557	110.506
91500	2015	Fe04A003	ok	0.00033927	4937.69	71.157	0.358311	5.58508	0.0970119	0.0750306	0.00255779	1.85149	0.0708382	0.179049	0.00311005	0.453994	0.0520806	0.00308326	1068.45	137.037	137.154	1061.78	36.8857	38.4027	1063.96	81.4145	82.122	1026.17	121.502	122.544	99.3756
91500	2016	Fe04A004	ok	0.00467959	4800.48	70.4082	0.354733	5.64649	0.100698	0.078276	0.00272879	1.91057	0.0748138	0.177101	0.00315839	0.455433	0.0548705	0.00255584	1153.02	138.391	138.526	1051.12	37.4909	38.955	1084.78	84.9556	85.6606	1079.7	100.583	101.974	91.1619
91500	2016	Fe04A009	ok	-0.000428358	4519.45	64.304	0.339084	5.59065	0.109533	0.0743502	0.00292521	1.83287	0.0805585	0.17887	0.00350445	0.445762	0.0545483	0.00243869	1050.11	158.593	158.69	1060.8	41.5666	42.916	1057.31	92.9418	93.5545	1073.52	95.9879	97.4275	101.018
91500	2016	Fe04A025	ok	0.00417744	4946.34	71.9051	0.351231	5.53685	0.110477	0.0785706	0.00287585	1.95573	0.0815294	0.180608	0.00360367	0.478633	0.052799	0.00249738	1160.47	145.145	145.274	1070.3	42.7111	44.0487	1100.42	91.7471	92.4191	1039.97	98.3801	99.6994	92.2291
91500	2016	Fe04A044	ok	-0.00133819	4541.18	65.7307	0.333356	5.62196	0.0967737	0.0733851	0.00266176	1.79901	0.0722274	0.177874	0.00306184	0.428746	0.0527248	0.00277683	1023.73	146.791	146.891	1055.35	36.3325	37.8534	1045.1	83.9182	84.5808	1038.54	109.393	110.577	103.089
91500	2016	Fe04A063	ok	0.00835437	4810.03	72.0305	0.36521	5.54607	0.107297	0.0820156	0.00269995	2.03809	0.0778222	0.180308	0.00348832	0.506665	0.0575376	0.00285037	1245.04	128.955	129.123	1068.66	41.3494	42.7255	1128.32	86.1676	86.9194	1130.74	112.032	113.402	85.8333
91500	2016	Fe04A082	ok	0.00427992	4490.99	67.4087	0.333818	5.5982	0.109418	0.0782518	0.00298964	1.92645	0.0826729	0.178629	0.00349134	0.455445	0.0570158	0.00288819	1152.41	151.681	151.803	1059.48	41.4155	42.7663	1090.31	93.5803	94.2273	1120.76	113.546	114.875	91.936
91500	2016	Fe04A100	ok	-0.000515913	3836.09	59.8568	0.29654	5.57359	0.124749	0.0743879	0.00276648	1.83941	0.0798409	0.179418	0.00401576	0.515651	0.0530894	0.00283053	1051.13	149.888	149.991	1063.79	47.62	48.8088	1059.65	91.9897	92.6114	1045.54	111.489	112.667	101.204
91500	2016	Fe04A110	ok	-0.00474215	4568.82	68.2158	0.363508	5.58974	0.0988337	0.0707362	0.00233256	1.74406	0.065257	0.178899	0.00316316	0.472551	0.0522881	0.00256811	948.909	134.989	135.082	1060.96	37.5182	39.0083	1024.97	76.7018	77.3986	1030.16	101.191	102.451	111.808
91500	2016	Fe04A127	ok	0.000881833	4827.17	71.8803	0.358843	5.55413	0.0950562	0.075689	0.00286225	1.87814	0.0779589	0.180046	0.0030814	0.412314	0.0533569	0.00270456	1085.98	151.617	151.726	1067.23	36.5301	38.0767	1073.41	89.111	89.7693	1050.67	106.513	107.758	98.2728
91500	2016	Fe04A145	ok	0.00262191	4653.07	70.6234	0.361506	5.60323	0.103504	0.076828	0.00253965	1.8897	0.0715582	0.178469	0.0032967	0.487811	0.054419	0.00276406	1115.86	131.947	132.079	1058.6	39.1094	40.5348	1077.48	81.6026	82.3265	1071.04	108.801	110.068	94.8688
91500	2016	Fe04A172	ok	0.00668776	4616.39	70.1601	0.351911	5.69324	0.105122	0.0796645	0.00300445	1.92849	0.0809798	0.175647	0.00324321	0.439719	0.0581099	0.00298305	1187.83	148.958	149.09	1043.15	38.5222	39.9274	1091.02	91.6263	92.2878	1141.67	117.215	118.55	87.8195
91500	2016	Fe04A173	ok	-0.00363042	4630.23	70.0197	0.368396	5.51962	0.119891	0.0721298	0.00245474	1.80102	0.0727127	0.181172	0.00393521	0.538002	0.0497518	0.00251419	988.72	138.466	138.565	1073.37	46.6292	47.8644	1045.83	84.4467	85.106	981.38	99.1873	100.353	108.562
91500	2016	SE23A003	ok	0.00153191	9420.58	83.8923	0.354877	5.57834	0.0668054	0.0760755	0.00179228	1.87954	0.0496733	0.179265	0.00214685	0.453143	0.0529465	0.00166332	1096.19	94.314	94.4922	1062.96	25.4597	27.6162	1073.9	56.763	57.792	1042.8	65.5194	67.4947	96.9687	0.998945
91500	2016	SE23A004	ok	-0.000954814	9135.79	82.4328	0.357208	5.63393	0.0724916	0.0736303	0.00177768	1.80118	0.0492766	0.177496	0.00228383	0.470319	0.0548811	0.00162619	1030.47	97.6094	97.7616	1053.28	27.105	29.1045	1045.89	57.2266	58.1952	1079.9	63.9973	66.1621	102.213	0.997416
91500	2016	SE23A023	ok	-0.000941897	9329.32	85.4839	0.359743	5.64362	0.0692436	0.0735796	0.00157642	1.79685	0.0443626	0.177191	0.00217402	0.496954	0.054257	0.00164612	1029.08	86.6364	86.8073	1051.61	25.8052	27.8915	1044.31	51.5664	52.6361	1067.94	64.8011	66.8935	102.19	0.994965
91500	2016	SE23A024	ok	0.000687999	9492.86	83.6656	0.35956	5.55158	0.071299	0.0755432	0.00151033	1.87539	0.0445641	0.180129	0.0023134	0.540471	0.0557063	0.00177834	1082.12	80.2051	80.4092	1067.68	27.4244	29.4547	1072.43	50.9677	52.1081	1095.71	69.9574	72.0008	98.6658	1.02173
91500	2016	SE23A045	ok	0.000129181	9315.6	84.8494	0.364242	5.57172	0.0683448	0.0749415	0.00187279	1.85373	0.0516044	0.179478	0.00220154	0.440631	0.0537975	0.00186499	1066.06	100.493	100.651	1064.12	26.1058	28.2175	1064.76	59.2818	60.2512	1059.13	73.4331	75.2559	99.8183	0.997567
91500	2016	SE23A046	ok	0.000617162	9635.35	89.8652	0.357614	5.60244	0.0764724	0.075151	0.00155095	1.84871	0.0457434	0.178494	0.0024364	0.551656	0.0528326	0.00156046	1071.67	82.9211	83.1148	1058.74	28.9032	30.805	1062.97	52.603	53.6895	1040.61	61.4707	63.5632	98.7935	0.998574
91500	2016	SE23A067	ok	-0.00196699	9188.4	82.0181	0.354621	5.6132	0.065068	0.0729137	0.00158814	1.79024	0.0441719	0.178152	0.00206513	0.46981	0.0545728	0.00168437	1010.67	88.3242	88.486	1056.87	24.5024	26.7118	1041.91	51.4157	52.4836	1073.99	66.2967	68.3663	104.571	1.0022
91500	2016	SE23A068	ok	-0.00174805	9861.5	87.9514	0.360605	5.56523	0.0651876	0.0734085	0.00158727	1.81792	0.0447052	0.179687	0.00210474	0.47632	0.0539715	0.0016673	1024.37	87.4989	87.6666	1065.26	24.9557	27.1615	1051.94	51.7371	52.8189	1062.46	65.644	67.6895	103.992	0.979269
91500	2016	SE23A090	ok	-0.000233946	9546.49	85.209	0.363693	5.52131	0.0669607	0.0749706	0.00150146	1.87137	0.0438146	0.181116	0.00219652	0.517988	0.0530206	0.00165321	1066.84	80.5265	80.7241	1073.07	26.0277	28.1796	1071.02	50.1516	51.3071	1044.22	65.1186	67.111	100.584	0.989884
91500	2016	SE23A091	ok	0.000629268	10000.9	89.9344	0.360071	5.57368	0.0669844	0.0753484	0.00153503	1.86314	0.044069	0.179415	0.00215621	0.508093	0.0536483	0.00165027	1076.94	81.7908	81.9891	1063.78	25.5689	27.7202	1068.1	50.5278	51.6687	1056.27	64.9832	67.0252	98.778	1.00672
91500	2016	SE23A113	ok	-0.000281093	10395.9	92.2356	0.365792	5.65204	0.0686406	0.0740805	0.00140515	1.80639	0.0406845	0.176927	0.00214867	0.539209	0.0520385	0.00163522	1042.78	76.5433	76.7419	1050.17	25.5072	27.6106	1047.77	47.1971	48.3712	1025.36	64.4403	66.382	100.708	1.01655
91500	2016	SE23A114	ok	0.000230672	9905.32	89.7741	0.359108	5.58677	0.0727912	0.0749284	0.00149819	1.84841	0.0441131	0.178994	0.00233216	0.545945	0.0533677	0.00174482	1065.71	80.4103	80.6077	1061.48	27.6605	29.6521	1062.86	50.7314	51.8569	1050.88	68.7155	70.6304	99.6032	0.996642
91500	2016	SE23A141	ok	0.00133851	10202.5	93.5356	0.361937	5.6176	0.0709232	0.0756585	0.00143289	1.85618	0.0422491	0.178012	0.00224743	0.554677	0.0537174	0.00158195	1085.18	75.9419	76.1587	1056.1	26.667	28.7075	1065.63	48.5102	49.6921	1057.59	62.2911	64.4238	97.321	1.02023
91500	2016	SE23A142	ok	0.000106424	9016.88	82.5845	0.356528	5.58866	0.0660669	0.0748119	0.00165206	1.84491	0.0462114	0.178934	0.00211529	0.471957	0.0543753	0.00179117	1062.58	88.8486	89.0264	1061.15	25.0889	27.2677	1061.62	53.1828	54.255	1070.21	70.5072	72.4431	99.8655	0.979299
AusZ-2	2015	AP30C204	ok	0.000995591	628.663	232.2	0.438373	175.153	6.6779	0.0475407	0.00670034	0.0374076	0.00546169	0.00570929	0.000217673	0.261129	0.00213066	0.00022272	75.4409	669.848	669.848	36.6998	2.79844	2.82271	37.2899	10.889	10.8955	43.0196	8.99374	9.01856	48.6471	0.984975
AusZ-2	2015	AP30C205	ok	0.000481486	665.325	239.086	0.44436	169.334	6.896	0.0471585	0.00676008	0.0383822	0.00571973	0.0059055	0.000240498	0.27328	0.00166667	0.000196939	56.2242	683.759	683.759	37.9574	3.09158	3.1151	38.2433	11.3981	11.4046	33.659	7.95454	7.97173	67.5107	0.938294
AusZ-2	2015	AP30C206	ok	0.00321532	643.889	231.83	0.447667	174.919	6.87914	0.0492981	0.00656356	0.0388424	0.00539238	0.00571694	0.000224834	0.283285	0.00176641	0.000194331	161.016	622.807	622.807	36.7488	2.89049	2.91406	38.6932	10.7433	10.7505	35.6716	7.84879	7.86835	22.8231	0.920031
AusZ-2	2015	AP30C207	ok	-0.00673749	647.579	222.357	0.425067	166.009	6.18874	0.0414605	0.00637149	0.0344202	0.00544299	0.00602375	0.000224562	0.235747	0.00164316	0.000199948	-260.312	779.357	-779.358	38.7151	2.88656	2.91274	34.3617	10.8675	10.873	33.1847	8.07617	8.09263	-14.8726	0.946879
AusZ-2	2015	AP30C208	ok	0.00166119	591.039	219.595	0.432422	173.775	6.52571	0.0480731	0.00645415	0.0381266	0.00531523	0.00575458	0.0002161	0.269369	0.00187512	0.000203503	101.839	634.953	634.953	36.9901	2.77816	2.80299	37.9933	10.5933	10.6003	37.8649	8.21878	8.23983	36.3222	0.942043
AusZ-2	2015	AP30C209	ok	-0.0175841	653.219	232.714	0.436214	168.229	6.177	0.0328672	0.0055659	0.0269262	0.00466576	0.00594428	0.000218261	0.211899	0.00177313	0.000211451	-888.196	979.576	-979.587	38.2059	2.80567	2.8319	26.9788	9.34975	9.35373	35.8071	8.54023	8.55835	-4.30151	0.946126
AusZ-2	2015	AP30C210	ok	-0.0100626	686.411	234.641	0.44001	161.041	5.66482	0.0388519	0.00556862	0.0332497	0.00490709	0.0062096	0.000218431	0.238349	0.0021131	0.000209033	-427.886	751.918	-751.922	39.9059	2.80748	2.83607	33.212	9.80307	9.80882	42.6653	8.44114	8.46715	-9.32629	0.926585
AusZ-2	2015	AP30C211	ok	-0.00660367	640.864	220.871	0.431381	164.655	6.48293	0.0415725	0.00583143	0.0347971	0.00506967	0.00607329	0.000239122	0.270246	0.00181112	0.000186819	-253.475	710.407	-710.409	39.0326	3.07364	3.09864	34.7315	10.1202	10.1263	36.5736	7.54523	7.56662	-15.399	0.917693
AusZ-2	2016	SE23A030	ok	-0.00266341	877.374	231.828	0.417569	164.364	4.8151	0.0446921	0.00410263	0.0374746	0.00361101	0.00608406	0.000178235	0.304024	0.00208786	0.000182914	-73.4728	448.81	-448.81	39.1016	2.29099	2.32455	37.3554	7.19905	7.20895	42.1563	7.38647	7.41548	-53.2191	0.981412
AusZ-2	2016	SE23A037	ok	0.00627638	860.945	229.411	0.413674	164.98	5.14329	0.051764	0.00421022	0.0432424	0.00376662	0.00606134	0.000188964	0.357906	0.00188048	0.000174165	274.004	372.725	372.728	38.956	2.42893	2.46037	42.9847	7.48835	7.50095	37.973	7.0339	7.05862	14.2173	0.961996
AusZ-2	2016	SE23A039	ok	0.00670798	877.874	224.497	0.417741	165.77	5.39751	0.0521019	0.00488824	0.0433172	0.00430183	0.00603246	0.000196418	0.327864	0.00254741	0.000202193	288.891	428.795	428.797	38.7709	2.52478	2.55476	43.0576	8.5521	8.56317	51.4233	8.16316	8.2022	13.4206	0.995022
AusZ-2	2016	SE23A040	ok	0.00503114	858.757	227.216	0.412796	169.867	4.85008	0.0507565	0.004378	0.0411808	0.0037416	0.00588696	0.000168086	0.314252	0.00179743	0.000174672	228.781	398.517	398.519	37.8385	2.16075	2.19406	40.9763	7.44604	7.45755	36.2974	7.05468	7.0772	16.5392	1.00091
AusZ-2	2016	SE23A052	ok	0.00936131	881.072	233.236	0.418935	164.694	5.31971	0.0542067	0.00466884	0.0453615	0.0041727	0.00607186	0.000196125	0.35114	0.0021127	0.000177298	378.67	387.416	387.421	39.0234	2.52095	2.55137	45.0452	8.28722	8.29972	42.6573	7.15962	7.19026	10.3054	1.005
AusZ-2	2016	SE23A061	ok	-0.00629535	831.809	229.088	0.417729	169.563	5.88652	0.0417948	0.00431256	0.0339705	0.00369829	0.0058975	0.000204736	0.31888	0.0017481	0.00016815	-239.989	521.18	-521.181	37.9061	2.63187	2.65938	33.9202	7.38562	7.39357	35.3022	6.79145	6.81358	-15.7949	0.982522
AusZ-2	2016	SE23A083	ok	-0.00287945	845.664	227.041	0.41424	166.718	4.8974	0.0445104	0.00455133	0.0367953	0.00391462	0.00599817	0.000176199	0.276113	0.00212383	0.000189945	-83.4395	500.89	-500.89	38.5512	2.26491	2.29791	36.6904	7.80691	7.81572	42.8818	7.67029	7.6992	-46.2026	0.967824
AusZ-2	2016	SE23A087	ok	-0.00851923	894.636	228.773	0.418886	160.315	4.86748	0.0400767	0.00466183	0.0344533	0.00414197	0.00623773	0.00018939	0.252554	0.00172264	0.000180136	-347.134	600.289	-600.292	40.0861	2.43419	2.4674	34.3942	8.26971	8.27702	34.7885	7.27564	7.2957	-11.5477	0.989839
AusZ-5	2015	AP30C194	ok	0.0213346	726.737	238.113	0.736169	156.866	5.5808	0.0637221	0.00739241	0.0559853	0.00679341	0.00637488	0.000226798	0.293193	0.00154165	0.000169867	731.497	491.552	491.567	40.9647	2.91479	2.94381	55.3123	13.4235	13.4351	31.1362	6.86148	6.87853	5.60011	0.959489
AusZ-5	2015	AP30C195	ok	0.00674818	712.215	235.024	0.749623	157.767	5.84105	0.0521727	0.00589641	0.0455764	0.00542026	0.00633847	0.000234671	0.311311	0.00157921	0.000130335	291.992	516.242	516.245	40.7314	3.01602	3.04376	45.2539	10.7638	10.7735	31.8941	5.26456	5.28785	13.9495	0.957294
AusZ-5	2015	AP30C196	ok	-0.0165572	659.954	235.948	0.737823	167.707	6.31609	0.0336821	0.00562112	0.0276796	0.00473554	0.00596277	0.000224566	0.220133	0.00186151	0.000143038	-817.907	950.664	-950.674	38.3243	2.88669	2.91235	27.7234	9.48608	9.49022	37.5903	5.77685	5.80632	-4.68566	0.970323
AusZ-5	2015	AP30C197	ok	0.00637265	633.204	230.382	0.720664	172.939	6.41478	0.0518048	0.00660697	0.0412846	0.00548345	0.00578238	0.000214484	0.279269	0.00180772	0.00013997	275.806	584.257	584.259	37.1682	2.75734	2.7826	41.0775	10.9119	10.9198	36.505	5.6531	5.68151	13.4762	0.963053
AusZ-5	2015	AP30C198	ok	-0.0169914	669.559	237.233	0.755558	168.878	5.98465	0.0333335	0.00587239	0.0272033	0.00488841	0.00592144	0.000209843	0.197206	0.00203153	0.000168328	-847.631	1010.06	-1010.07	38.0595	2.69749	2.72455	27.2527	9.7946	9.79847	41.0201	6.79767	6.82751	-4.4901	0.944127
AusZ-5	2015	AP30C201	ok	4.90365e-05	666.825	235.755	0.761972	167.493	7.48949	0.0468244	0.00632881	0.038529	0.00548518	0.0059704	0.000266968	0.314089	0.00202464	0.000155974	39.2413	646.769	646.769	38.3732	3.43174	3.4534	38.3869	10.9299	10.9368	40.881	6.2988	6.33077	97.7878	0.926251
AusZ-5	2015	AP30C202	ok	-0.000874648	656.388	236.592	0.751818	172.068	6.07863	0.0460736	0.00597501	0.0369033	0.00496016	0.00581167	0.000205309	0.262831	0.00172168	0.000152578	0.424328	625.139	625.139	37.356	2.63935	2.666	36.7962	9.89151	9.8985	34.769	6.16259	6.18624	8803.57	0.938119
AusZ-5	2015	AP30C203	ok	0.00347216	664.06	237.776	0.751744	169.374	6.35758	0.049525	0.00652082	0.0402987	0.00551741	0.0059041	0.000221615	0.274158	0.00167606	0.000133375	171.744	614.703	614.704	37.9484	2.84885	2.87434	40.1156	10.9847	10.9922	33.8486	5.38709	5.41272	22.0959	0.94803
AusZ-5	2016	Fe04A169	ok	0.0127475	591.567	256.35	0.761222	159.739	6.29627	0.0569109	0.00827137	0.0491017	0.00739417	0.00626021	0.000246752	0.261745	0.00158042	0.000156858	487.12	641.52	641.525	40.2301	3.17142	3.19716	48.6716	14.6588	14.6671	31.9186	6.3359	6.3553	8.25876
AusZ-5	2016	Fe04A046	ok	-0.00871263	549.872	253.442	0.755799	171.778	6.72044	0.0398726	0.0102648	0.0319903	0.00833019	0.00582147	0.000227752	0.150243	0.00190343	0.00018741	-360.331	1332.09	-1332.09	37.4188	2.92785	2.95198	31.9737	16.6517	16.6548	38.436	7.56876	7.59231	-10.3845
AusZ-5	2016	Fe04A148	ok	-0.000139492	552.838	257.893	0.75487	171.065	7.13284	0.0466596	0.00742551	0.0375918	0.00618436	0.00584573	0.000243748	0.253454	0.00198499	0.000154046	30.7987	762.74	762.74	37.5743	3.13345	3.15619	37.4701	12.3287	12.3345	40.0812	6.22107	6.25219	122
AusZ-5	2016	Fe04A007	ok	0.00609059	587.931	259.471	0.749014	168.65	7.07141	0.0516003	0.00821446	0.0421674	0.00694173	0.00592942	0.000248617	0.254699	0.00210579	0.000184944	266.737	730.478	730.48	38.1106	3.19591	3.21885	41.9379	13.8079	13.8144	42.5179	7.46839	7.49758	14.2877
AusZ-5	2016	Fe04A168	ok	0.00470236	595.974	260.076	0.752538	162.182	7.58543	0.0505316	0.00776089	0.0429411	0.00689412	0.00616591	0.000288386	0.291321	0.00247013	0.000223304	218.515	710.921	710.922	39.626	3.7067	3.7281	42.6915	13.7081	13.7149	49.8652	9.0158	9.04906	18.1342
AusZ-5	2016	SE23A032	ok	0.00333453	843.424	225.143	0.665026	166.692	5.1007	0.0494281	0.0045099	0.0408667	0.00393285	0.00599907	0.000183568	0.317963	0.00185109	0.00012748	167.169	426.33	426.331	38.557	2.35964	2.39134	40.6699	7.82782	7.83861	37.3802	5.14853	5.18121	23.0647
AusZ-5	2016	SE23A049	ok	-0.00321652	835.926	227.137	0.660466	168.987	5.48443	0.0442337	0.00473383	0.0360755	0.00403438	0.00591762	0.000192055	0.290211	0.00201701	0.000160174	-98.7387	525.786	-525.786	38.035	2.46883	2.49834	35.9852	8.04856	8.05677	40.7272	6.46843	6.49934	-38.5209	0.941757
AusZ-5	2016	SE23A054	ok	0.0104045	829.298	224.868	0.665128	167.699	5.26614	0.0550183	0.00509139	0.0452157	0.0044186	0.00596306	0.000187254	0.321341	0.00198767	0.000132878	411.995	413.821	413.827	38.3262	2.40706	2.43778	44.9035	8.7762	8.78793	40.1354	5.36619	5.40233	9.30258	0.934275
AusZ-5	2016	SE23A057	ok	0.00499952	850.82	231.651	0.664892	166.988	5.5974	0.0507443	0.00535435	0.0418807	0.00463671	0.00598845	0.000200731	0.302764	0.00178035	0.000119667	228.227	487.557	487.558	38.4889	2.58028	2.60919	41.6586	9.22424	9.23385	35.9528	4.83317	4.86538	16.8643	0.983093
AusZ-5	2016	SE23A058	ok	-0.00242946	847.417	229.721	0.661431	172.372	5.74785	0.044842	0.00455062	0.0358534	0.00382983	0.0058014	0.000193451	0.312168	0.00203858	0.00015359	-65.292	495.373	-495.373	37.2902	2.48692	2.51509	35.7675	7.64132	7.64987	41.1624	6.20247	6.23538	-57.1129	0.96225
AusZ-5	2016	SE23A081	ok	0.00151211	863.8	223.509	0.654472	165.467	5.21514	0.0479914	0.00477344	0.0399729	0.00417071	0.00604351	0.000190478	0.302073	0.00215021	0.000148449	97.8174	470.757	470.758	38.8417	2.44841	2.47943	39.7976	8.30484	8.31458	43.4138	5.99455	6.03241	39.7084
AusZ-5	2016	SE23A094	ok	0.00263953	834.361	220.411	0.661324	165.948	5.29001	0.0488815	0.00458727	0.0405961	0.00402353	0.00602599	0.000192094	0.321634	0.00218281	0.000153705	141.127	440.604	440.605	38.7294	2.4692	2.49978	40.4059	8.00936	8.01977	44.0714	6.20666	6.24435	27.443	0.969236
AusZ-5	2016	SE23A095	ok	0.000198766	815.131	218.633	0.657251	169.058	5.60143	0.046936	0.00508288	0.0382633	0.00433329	0.00591513	0.000195987	0.292569	0.00173759	0.000128494	44.932	517.652	517.652	38.0191	2.51939	2.54828	38.1271	8.63571	8.64431	35.0902	5.1898	5.21838	84.6146	0.957141
GJ1	2016	Fe04A166	ok	5.34328e-05	13504.3	368.454	0.033088	10.2361	0.124409	0.0599665	0.00133853	0.807397	0.0205206	0.0976935	0.00118736	0.478206	0.0281594	0.00284971	601.425	96.6319	96.6843	600.878	14.6061	15.8087	600.992	30.5493	31.1477	561.297	113.606	113.941	99.909
GJ1	2016	Fe04A167	ok	-0.00159304	13406.8	364.458	0.0354283	10.1873	0.130427	0.0586968	0.00131596	0.794088	0.0205016	0.0981617	0.00125675	0.495895	0.0268581	0.00290197	554.918	97.8212	97.8653	603.627	15.4564	16.6076	593.488	30.6451	31.2269	535.701	115.763	116.062	108.778
GJ1	2016	Fe04A028	ok	-0.00200405	14123.3	367.019	0.0348224	10.15	0.115743	0.0584193	0.00125751	0.793241	0.0193229	0.0985226	0.00112348	0.468126	0.0333306	0.00300692	544.573	94.0846	94.1287	605.745	13.815	15.1005	593.008	28.8907	29.5062	662.703	119.571	120.014	111.233
GJ1	2016	Fe04A129	ok	0.000129503	13440.8	362.431	0.0345827	10.0201	0.119375	0.0603721	0.00132795	0.830381	0.0207722	0.0997996	0.00118897	0.476254	0.0308253	0.00301587	615.999	94.9921	95.048	613.234	14.6117	15.8618	613.824	30.7099	31.3306	613.637	120.074	120.452	99.5511
GJ1	2016	Fe04A006	ok	-0.00238781	13872.7	366.285	0.0359323	9.9733	0.141031	0.0583895	0.00129744	0.806879	0.0212519	0.100268	0.00141787	0.536892	0.029843	0.00258868	543.456	97.1403	97.1828	615.978	17.4209	18.4912	600.701	31.643	32.2205	594.368	103.115	103.528	113.345
GJ1	2016	SE23A076	ok	0.000750562	22487.8	369.822	0.0354186	10.0561	0.105924	0.0608216	0.000883675	0.833567	0.0149588	0.0994421	0.00104746	0.586962	0.0289857	0.0018456	631.995	62.5774	62.6667	611.139	12.8746	14.2686	615.589	22.0941	22.9539	577.535	73.5464	74.0923	96.7	1.0001
GJ1	2016	SE23A088	ok	0.00125375	21678	362.944	0.0352852	10.2421	0.099087	0.0609383	0.000948581	0.819998	0.0150287	0.0976362	0.000944578	0.527861	0.0319193	0.00174601	636.119	66.9993	67.0838	600.541	11.6198	13.0979	608.048	22.2882	23.1204	635.078	69.4784	70.1762	94.407	1.00247
GJ1	2016	SE23A101	ok	-0.00189469	22024.4	362.351	0.0356803	10.1397	0.101215	0.058525	0.000925543	0.795481	0.0148766	0.0986226	0.000984461	0.533764	0.0284125	0.00195612	548.521	69.0764	69.1373	606.332	12.1049	13.5563	594.276	22.2275	23.0252	566.273	77.9727	78.468	110.539	1.00423
GJ1	2016	SE23A110	ok	-0.00046293	22413.6	355.15	0.0359676	10.0925	0.0978633	0.0597707	0.00100082	0.81621	0.0157932	0.0990835	0.000960777	0.501133	0.0290793	0.00189067	594.341	72.5749	72.643	609.036	11.8112	13.3072	605.932	23.4488	24.2358	579.373	75.339	75.8754	102.472	0.988344
GJ1	2016	SE23A124	ok	-0.00070373	22688.4	361.072	0.035117	10.2336	0.0988401	0.0593516	0.000985337	0.799315	0.0153523	0.0977177	0.0009438	0.502865	0.0277558	0.00245305	579.072	72.1413	72.2063	601.02	11.6098	13.0913	596.442	22.9115	23.6917	553.361	97.8118	98.1893	103.79	0.999047
GJ1	2016	SE23A137	ok	0.000528792	20837.5	349.197	0.0355313	10.1362	0.106137	0.0605119	0.00106657	0.822771	0.016868	0.0986564	0.00103304	0.510749	0.0313288	0.00228723	620.991	76.055	76.1259	606.53	12.7021	14.093	609.593	24.9951	25.7437	623.508	91.0413	91.5557	97.6713	0.981083
GJ1	2016	SE23A139	ok	-0.00110341	22031	359.582	0.0348943	10.202	0.118395	0.059074	0.00101001	0.798038	0.0164906	0.09802	0.00113753	0.561609	0.0322837	0.00209016	568.878	74.4232	74.484	602.795	13.9909	15.2498	595.721	24.6199	25.3458	642.213	83.1583	83.7553	105.962	0.996064
FC-1	2015	AP30C140	ok	0.000837424	36535.1	411.818	0.614733	5.44215	0.0546988	0.0764108	0.00102369	1.93507	0.0324092	0.183751	0.00184687	0.600115	0.055792	0.000991158	1104.98	53.5626	53.8808	1087.43	21.8595	24.4465	1093.29	36.6218	38.2534	1097.35	38.9892	42.5571	98.4117	0.957495
FC-1	2015	AP30C141	ok	-0.000200546	34258	390.371	0.629039	5.38977	0.0455295	0.0759066	0.000878026	1.94098	0.0278014	0.185537	0.0015673	0.589763	0.0544677	0.000998759	1091.74	46.3372	46.6959	1097.15	18.5361	21.5762	1095.34	31.3778	33.2745	1071.98	39.3131	42.6986	100.496	0.936353
FC-1	2015	AP30C142	ok	0.000610771	15529.9	180.744	0.56506	5.40021	0.0553973	0.0765147	0.00129809	1.95275	0.0387144	0.185178	0.00189962	0.517429	0.0546896	0.00128258	1107.7	67.8005	68.0533	1095.2	22.4699	25.0282	1099.39	43.5923	44.9869	1076.23	50.4794	53.1792	98.8717	0.978844
FC-1	2015	AP30C143	ok	0.00250403	22452.6	260.326	0.633177	5.41434	0.0533344	0.0780064	0.00109116	1.98562	0.033971	0.184695	0.00181935	0.575772	0.0545637	0.00111975	1146.17	55.5857	55.9156	1092.57	21.5249	24.1713	1110.63	38.0026	39.6267	1073.82	44.0735	47.1283	95.3236	1.01416
FC-1	2015	AP30C144	ok	-0.00149437	38683.9	441.439	0.639684	5.34231	0.044255	0.0751595	0.000893423	1.93895	0.0280929	0.187185	0.00155061	0.571744	0.0556455	0.000956909	1071.9	47.7597	48.0953	1106.11	18.3257	21.4423	1094.64	31.7198	33.5949	1094.54	37.6446	41.3107	103.192	1.00767
FC-1	2015	AP30C145	ok	-0.000577779	42439.7	479.358	0.508617	5.29678	0.0440941	0.0762651	0.00088452	1.98439	0.0283297	0.188794	0.00157165	0.583112	0.0573569	0.001039	1101.17	46.3953	46.7598	1114.84	18.5614	21.6895	1110.21	31.6995	33.628	1127.28	40.8408	44.441	101.241	0.988077
FC-1	2016	SE23A079	ok	0.000226939	52493.8	454.786	0.767088	5.42397	0.047852	0.0760246	0.000794709	1.93174	0.0264236	0.184367	0.00162654	0.644971	0.0547479	0.000858461	1094.85	41.8557	42.2547	1090.79	19.2465	22.1577	1092.14	29.878	31.8529	1077.35	33.7862	37.7086	99.6292	1.01876
FC-1	2016	SE23A085	ok	-0.000978843	42640.7	375.984	0.736425	5.3574	0.0489587	0.075484	0.000990694	1.94184	0.0310552	0.186658	0.00170577	0.571418	0.0560607	0.000980184	1080.54	52.6637	52.9732	1103.24	20.164	23.0194	1095.63	35.0443	36.7532	1102.49	38.5526	42.1898	102.101	1.02864
FC-1	2016	SE23A107	ok	0.00127607	45405.5	416.392	0.676634	5.38114	0.0454786	0.0772099	0.000791993	1.97747	0.0262824	0.185834	0.00157057	0.635886	0.0552902	0.000895504	1125.75	40.8846	41.3162	1098.77	18.5724	21.6157	1107.86	29.4488	31.5068	1087.74	35.2349	39.0816	97.6035	0.985384
FC-1	2016	SE23A128	ok	0.000552822	45036	393.8	0.67953	5.38753	0.0468762	0.076556	0.000740999	1.9584	0.0254887	0.185614	0.001615	0.668524	0.0559253	0.000919172	1108.78	38.6758	39.1183	1097.57	19.0996	22.0643	1101.33	28.6678	30.7542	1099.9	36.1552	39.9937	98.9891	1.0169
FC-1	2016	SE23A129	ok	0.00074779	44937.6	401.926	0.681296	5.36224	0.0465289	0.0769013	0.000895657	1.97651	0.0287065	0.186489	0.00161819	0.597441	0.0548507	0.000911839	1117.76	46.4763	46.8511	1102.33	19.1301	22.1147	1107.53	32.1712	34.064	1079.32	35.8852	39.6132	98.6191	0.993186
FC-1	2016	SE23A130	ok	-9.47729e-05	43050.6	390.021	0.658703	5.44583	0.0475936	0.0756018	0.000760907	1.91329	0.0255031	0.183627	0.0016048	0.655648	0.0538027	0.000876688	1083.67	40.3667	40.7719	1086.76	18.9953	21.9196	1085.73	28.9445	30.9559	1059.23	34.5191	38.2446	100.284	0.965544
FC-1	2016	SE23A131	ok	0.000176466	40662.8	363.09	0.70924	5.41401	0.0473668	0.0760521	0.00074765	1.936	0.0254779	0.184706	0.00161598	0.664809	0.0554204	0.00088133	1095.57	39.3587	39.7833	1092.63	19.1188	22.0561	1093.62	28.7841	30.8345	1090.23	34.6751	38.5946	99.7318	0.984648
M257	2015	AP30C151	ok	-0.00040221	34869.9	790.439	0.277495	10.8529	0.0942867	0.0586992	0.000840345	0.745418	0.0124828	0.0921415	0.0008005	0.518794	0.0284763	0.000636559	555.008	62.463	62.532	568.19	9.87256	11.4093	565.562	18.9418	19.786	567.527	25.373	26.8628	102.375	0.980488
M257	2015	AP30C152	ok	0.000203914	35431.8	800.811	0.281299	10.8745	0.097857	0.0591643	0.000775356	0.74983	0.0119202	0.0919582	0.00082751	0.566058	0.0274695	0.000631909	572.201	57.0133	57.0936	567.108	10.2065	11.6942	568.126	18.0633	18.9544	547.732	25.2	26.5994	99.1099	0.98647
M257	2015	AP30C153	ok	-1.42752e-05	35475.1	799.053	0.281243	10.8538	0.0967583	0.0590144	0.000867161	0.749357	0.0128791	0.0921337	0.000821344	0.518694	0.0286636	0.000679047	566.68	63.9855	64.0557	568.144	10.1297	11.6323	567.851	19.5191	20.3459	571.207	27.064	28.4832	100.258	0.965789
M257	2015	AP30C154	ok	0.00119042	35206.3	801.524	0.279174	10.9624	0.094939	0.059851	0.000757729	0.752451	0.0115419	0.091221	0.000790013	0.564602	0.0268652	0.000575198	597.249	54.8463	54.9373	562.754	9.74739	11.2736	569.646	17.4756	18.4001	535.84	22.9452	24.4101	94.2243	0.985319
M257	2015	AP30C155	ok	-0.000655238	36315.7	821.154	0.279853	10.9562	0.0988929	0.0583539	0.000838742	0.734041	0.0124585	0.0912721	0.000823837	0.531812	0.0276324	0.000633327	542.125	62.8499	62.9153	563.056	10.1645	11.6376	558.922	18.9726	19.7962	550.935	25.2546	26.667	103.861	0.983309
M257	2015	AP30C156	ok	0.000654534	36269.6	819.775	0.280677	10.8214	0.0948277	0.0596042	0.000723759	0.75911	0.0113673	0.0924093	0.000809779	0.585192	0.0276673	0.000580852	588.292	52.6836	52.7754	569.77	9.98575	11.5153	573.497	17.1757	18.1279	551.621	23.1617	24.6978	96.8516	1.00184
M257	2015	AP30C157	ok	-0.00230559	36434.9	828.408	0.281223	10.828	0.0941795	0.0571801	0.000752387	0.727792	0.0114795	0.0923528	0.000803261	0.551431	0.0278968	0.000587133	497.527	57.976	58.0357	569.437	9.90563	11.4442	555.256	17.5162	18.3937	556.135	23.4095	24.9546	114.453	1.01304
M257	2016	SE23A016	ok	-0.000187809	51473.1	856.345	0.278454	10.703	0.0856459	0.0590809	0.000584469	0.760772	0.00968	0.0934319	0.000747647	0.628899	0.028855	0.000549874	569.132	43.06	43.1652	575.802	9.2152	10.8861	574.456	14.6187	15.73	574.968	21.9137	23.6661	101.172	0.995351
M257	2016	SE23A019	ok	7.37282e-05	52013.8	892.099	0.276024	10.6901	0.0854625	0.0593126	0.000582134	0.764679	0.0096798	0.0935449	0.000747852	0.631551	0.0293636	0.000544517	577.642	42.6592	42.7686	576.468	9.21724	10.8914	576.706	14.6006	15.7217	584.957	21.6948	23.5232	99.7969	1.03982
M257	2016	SE23A036	ok	0.000527648	52381.5	884.507	0.276648	10.8119	0.0934372	0.0595137	0.000682762	0.758626	0.0108963	0.0924907	0.000799311	0.601683	0.0288244	0.00057097	584.996	49.8025	49.8986	570.251	9.85629	11.4057	573.217	16.4664	17.4564	574.368	22.7548	24.4435	97.4794	1.03667
M257	2016	SE23A050	ok	0.000455529	51679.2	881.33	0.277633	10.7927	0.0869019	0.0594813	0.000620424	0.759562	0.0100087	0.0926554	0.000746055	0.611065	0.0276581	0.000526169	583.813	45.289	45.3943	571.222	9.19889	10.8478	573.758	15.1207	16.1951	551.441	20.9813	22.6646	97.8434	0.987268
M257	2016	SE23A065	ok	0.000986795	51184.5	876.495	0.275939	10.7847	0.0901346	0.0599258	0.000627099	0.765803	0.010256	0.0927238	0.000774951	0.624055	0.0294447	0.000609321	599.953	45.3138	45.4249	571.626	9.55488	11.1534	577.353	15.4643	16.5292	586.55	24.2758	25.9314	95.2785	1.05157
M257	2016	SE23A080	ok	-0.000519055	52592.8	864.209	0.276474	10.8379	0.0906366	0.0586243	0.000624716	0.745497	0.0100985	0.0922691	0.000771643	0.617373	0.0289204	0.000551738	552.221	46.5165	46.6082	568.943	9.5161	11.1062	565.609	15.3235	16.3557	576.253	21.9873	23.7418	103.028	1.06682
Monastery	2015	AP30C166	ok	0.00141214	71.8841	11.5115	0.325324	74.2872	8.22213	0.0488549	0.0295992	0.0906371	0.0558221	0.0134613	0.0014899	0.179709	0.00337102	0.00275328	139.851	2845.19	2845.19	86.198	19.0808	19.1006	88.0967	108.515	108.519	68.0213	111.113	111.118	61.6358	0.942669
Monastery	2015	AP30C167	ok	0.0518231	70.4862	10.9795	0.335304	71.2762	8.34562	0.0889378	0.0431535	0.171971	0.085837	0.0140299	0.00164274	0.234581	5e-05	7.21007e-05	1401.99	1859.3	1859.32	89.8142	21.0324	21.0518	161.128	160.85	160.858	1.01059	2.91456	2.9146	6.40621	0.968196
Monastery	2015	AP30C168	ok	0.048412	93.1255	13.9268	0.323494	69.2687	7.51336	0.0862883	0.0281767	0.171683	0.0590736	0.0144365	0.00156589	0.315233	5e-05	3.71345e-05	1343.81	1261.41	1261.43	92.3986	20.0444	20.066	160.878	110.712	110.724	1.01059	1.50111	1.50119	6.87588	0.946084
Monastery	2015	AP30C169	ok	0.0150567	81.1337	11.267	0.309577	64.5995	7.28871	0.0599499	0.0269867	0.1279	0.0593558	0.01548	0.0017466	0.243125	0.00592014	0.00371244	600.825	1948.97	1948.97	99.026	22.3461	22.3683	122.209	113.429	113.436	119.306	149.631	149.642	16.4817	0.9405
Monastery	2015	AP30C170	ok	0.0556433	78.8174	11.8758	0.318683	68.9926	7.28065	0.0920368	0.0790714	0.183853	0.159141	0.0144943	0.00152955	0.121915	0.0135757	0.00399323	1467.32	3262.99	3263	92.7656	19.5787	19.601	171.371	296.672	296.677	272.55	160.338	160.394	6.32212	0.949817
Monastery	2015	AP30C171	ok	0.0367865	92.3942	14.2084	0.318682	70.5437	7.68168	0.0770238	0.0238055	0.15048	0.0493105	0.0141756	0.00154362	0.332305	0.00868654	0.00335499	1120.94	1232.74	1232.75	90.7402	19.7618	19.7829	142.336	93.2834	93.2945	174.816	135.038	135.065	8.09501	0.938236
Monastery	2015	AP30C172	ok	0.0550674	69.3606	12.1239	0.320873	81.4095	10.4627	0.0912617	0.0310846	0.154499	0.0562453	0.0122836	0.00157868	0.353027	0.00355826	0.00313264	1451.24	1296.46	1296.48	78.7027	20.2296	20.2451	145.877	106.213	106.223	71.7927	126.411	126.416	5.42313	0.925551
Monastery	2015	AP30C173	ok	0.0119588	77.7623	12.1749	0.320529	72.2021	7.40245	0.0572749	0.0311845	0.109327	0.0605713	0.01385	0.00141996	0.185049	0.00489243	0.00261808	501.176	2397.47	2397.48	88.6703	18.1817	18.2036	105.349	116.735	116.74	98.6459	105.577	105.588	17.6925	0.918599
Monastery	2016	SE23A010	ok	-0.0139638	100.279	10.6943	0.342609	66.7316	5.79098	0.0368433	0.0321	0.0760922	0.0666237	0.0149854	0.00130044	0.0991132	0.00749346	0.00304126	-569.159	4706.45	-4706.45	95.8855	16.6419	16.6699	74.4642	130.397	130.399	150.895	122.483	122.505	-16.8469	0.977161
Monastery	2016	SE23A020	ok	0.00164505	85.0539	10.7885	0.330621	75.5615	7.48425	0.0490105	0.0386358	0.0893925	0.0710236	0.0132343	0.00131083	0.124666	0.00180045	0.00293165	147.315	3696.93	3696.93	84.7539	16.7895	16.8112	86.9373	138.146	138.149	36.3584	118.404	118.405	57.5325	0.96424
Monastery	2016	SE23A027	ok	0.0320826	86.5633	10.9444	0.334614	76.8212	7.17367	0.0731312	0.0245972	0.1312	0.0457974	0.0130172	0.00121557	0.267518	0.000246722	0.00255605	1016.71	1362.65	1362.66	83.373	15.571	15.5936	125.175	87.3889	87.398	4.98618	103.314	103.314	8.20027	0.976141
Monastery	2016	SE23A028	ok	0.029398	92.1608	11.4702	0.315996	75.4838	6.30827	0.0710328	0.0256446	0.129693	0.0480606	0.0132479	0.00110714	0.22552	0.00266551	0.00246277	957.468	1475.95	1475.96	84.8405	14.1805	14.2061	123.822	91.7698	91.7783	53.8043	99.4236	99.4272	8.86093	0.964419
Monastery	2016	SE23A031	ok	0.0179522	94.8518	11.3073	0.323865	73.5912	6.39601	0.0619965	0.0216932	0.116106	0.0418611	0.0135886	0.00118102	0.241061	0.00645845	0.00274028	673.058	1496.88	1496.88	87.0079	15.1242	15.1495	111.535	80.4266	80.4345	130.12	110.418	110.437	12.9273
Monastery	2016	SE23A034	ok	-0.0145848	98.6344	10.8112	0.328821	66.8427	7.11191	0.0363472	0.0210485	0.0749427	0.0441254	0.0149605	0.00159176	0.180706	0.00781413	0.00263774	-605.919	3152.48	-3152.48	95.7273	20.3703	20.3931	73.379	86.4095	86.4126	157.327	106.215	106.243	-15.7987
Monastery	2016	SE23A035	ok	-0.0101241	104.127	11.7326	0.321109	68.4165	6.25773	0.0398455	0.0207076	0.0802659	0.0423551	0.0146164	0.00133689	0.173333	0.00247802	0.00222935	-362.086	2690.06	-2690.06	93.5411	17.1115	17.1374	78.3949	82.7356	82.7394	50.0244	90.0089	90.0123	-25.8339	0.990514
Monastery	2016	SE23A038	ok	0.0610986	100.108	11.3158	0.323856	74.6383	6.6968	0.0962074	0.0243139	0.177647	0.0476412	0.0133979	0.00120211	0.334566	0.00540737	0.00190231	1551.01	949.198	949.233	85.7952	15.3957	15.4199	166.034	89.0535	89.0693	109	76.6928	76.7115	5.53158	0.979709
Monastery	2016	SE23A041	ok	-0.0176054	89.8249	10.7482	0.327248	72.8928	7.03618	0.033796	0.0318557	0.0638988	0.0605452	0.0137188	0.00132424	0.101875	0.00726822	0.00286346	-808.3	5358.19	-5358.19	87.8358	16.9572	16.9802	62.8931	119.185	119.186	146.376	115.335	115.358	-10.8667	0.963269
Monastery	2016	SE23A043	ok	-0.0155062	92.4394	10.3738	0.325834	71.8105	7.00372	0.0354874	0.0231211	0.0681081	0.0448689	0.0139255	0.00135817	0.148045	0.000894294	0.00288147	-671.531	3596.41	-3596.41	89.1505	17.3898	17.4129	66.9026	88.1494	88.152	18.0676	116.43	116.43	-13.2757	0.978416
Monastery	2016	SE23A051	ok	0.00485706	92.7725	10.7435	0.328072	69.3629	6.79883	0.0517123	0.0259899	0.102749	0.0526133	0.0144169	0.00141312	0.191421	0.00908531	0.0028987	271.712	2304.1	2304.1	92.2739	18.089	18.1129	99.311	101.705	101.71	182.805	116.649	116.684	33.9602	0.968746
Monastery	2016	SE23A059	ok	0.00284971	89.1421	10.2869	0.335135	70.5584	7.33736	0.0500874	0.0241117	0.0978344	0.0481831	0.0141727	0.00147381	0.211149	0.00252108	0.00254141	198.038	2236.63	2236.63	90.7215	18.8682	18.8903	94.7754	93.3531	93.358	50.8926	102.606	102.609	45.8101	0.965106
Mudtank	2015	AP30C174	ok	0.027718	791.235	14.7787	0.513572	8.62721	0.313657	0.0857548	0.00751337	1.36994	0.12995	0.115912	0.0042142	0.383274	0.0300159	0.00306715	1331.82	339.016	339.089	706.993	51.4079	51.8981	876.137	166.218	166.454	597.761	122.164	122.516	53.0847	0.95066
Mudtank	2015	AP30C175	ok	0.00569548	760.648	14.0954	0.525298	8.7593	0.336861	0.0673435	0.00660837	1.05959	0.111677	0.114164	0.00439048	0.364886	0.03559	0.0032133	847.511	408.121	408.146	696.888	53.6012	54.0582	733.622	154.642	154.82	706.849	127.638	128.11	82.2275	0.947664
Mudtank	2015	AP30C176	ok	0.00671401	749.74	13.8856	0.510479	8.62141	0.291312	0.0684955	0.00675713	1.09495	0.114178	0.11599	0.00391924	0.324035	0.0358271	0.00328405	882.684	408.023	408.049	707.443	47.8081	48.3355	750.908	156.605	156.789	711.474	130.433	130.901	80.1469	0.927985
Mudtank	2015	AP30C177	ok	0.00283097	880.399	16.1745	0.535027	8.44917	0.279326	0.0657097	0.00594206	1.07183	0.103199	0.118355	0.00391276	0.34336	0.0352943	0.00318239	796.229	379.179	379.202	721.087	47.6776	48.2269	739.64	142.429	142.625	701.076	126.428	126.897	90.5628	0.939317
Mudtank	2015	AP30C180	ok	-0.00178719	788.634	14.2931	0.534291	8.55822	0.326911	0.0616505	0.00611685	0.992808	0.105553	0.116847	0.00446337	0.359288	0.0343028	0.00353664	661.074	425.285	425.299	712.389	54.4244	54.8947	700.152	148.877	149.045	681.709	140.569	140.968	107.762	0.952707
Mudtank	2015	AP30C181	ok	0.00585544	779.903	13.9093	0.529126	8.2974	0.316844	0.0685762	0.00638861	1.13905	0.114683	0.12052	0.00460216	0.379269	0.0341137	0.00309475	885.118	385.169	385.197	733.554	56.023	56.5074	772.06	155.467	155.663	678.013	123.017	123.468	82.8765	0.9462
Mudtank	2015	AP30C182	ok	-0.00916717	774.144	13.9309	0.525003	8.49064	0.336574	0.0557369	0.00537992	0.904721	0.0944044	0.117777	0.00466874	0.379894	0.0311322	0.00323569	440.936	429.464	429.471	717.754	56.9044	57.3611	654.248	136.537	136.697	619.656	128.806	129.166	162.78	0.978516
Mudtank	2015	AP30C183	ok	-0.00070556	837.243	16.1239	0.522653	9.05462	0.324806	0.061453	0.0055681	0.935374	0.0911522	0.110441	0.00396172	0.368105	0.0422924	0.00368904	654.195	388.819	388.834	675.308	48.4491	48.9236	670.458	130.672	130.848	837.242	146.06	146.639	103.227	0.963869
Mudtank	2016	SE23A014	ok	0.0111359	1162.7	15.8914	0.509924	8.44145	0.251997	0.0725638	0.00435558	1.18472	0.0794209	0.118463	0.00353641	0.445308	0.0316499	0.00233087	1000.91	243.764	243.822	721.712	43.0897	43.6977	793.509	106.39	106.692	629.8	92.7637	93.2788	72.1053	0.973877
Mudtank	2016	SE23A017	ok	0.0109271	1071.63	15.3736	0.513814	8.9712	0.261274	0.0711781	0.00478176	1.09347	0.0800656	0.111468	0.00324635	0.397748	0.0362501	0.00263071	961.642	274.472	274.519	681.267	39.682	40.2701	750.19	109.86	110.121	719.728	104.463	105.06	70.8441	0.981454
Mudtank	2016	SE23A042	ok	-0.000734268	1036.15	14.6748	0.526424	8.59601	0.260666	0.0624288	0.00452599	1.00092	0.0786573	0.116333	0.0035277	0.385877	0.0359932	0.0026535	687.901	309.384	309.405	709.423	43.0252	43.6137	704.278	110.691	110.92	714.716	105.381	105.965	103.129	0.920218
Mudtank	2016	SE23A055	ok	0.005451	1263.44	17.514	0.524741	8.48016	0.236859	0.067791	0.00464585	1.10174	0.0815346	0.117922	0.00329367	0.377418	0.0391218	0.00257108	861.267	284.407	284.443	718.594	40.1419	40.7883	754.193	111.628	111.888	775.663	101.953	102.663	83.4344	0.958478
Mudtank	2016	SE23A056	ok	-0.00536481	1162.38	16.0381	0.521541	8.27923	0.246286	0.0593804	0.00397184	0.988474	0.0723609	0.120784	0.00359303	0.406361	0.0330999	0.00223381	580.126	290.605	290.621	735.076	43.7333	44.3547	697.942	102.185	102.428	658.189	88.8381	89.4252	126.71	0.966618
Mudtank	2016	SE23A060	ok	0.0062425	1095.43	15.6843	0.509827	8.70931	0.266309	0.0679058	0.00418471	1.07457	0.0739244	0.11482	0.0035109	0.444478	0.037269	0.0028528	864.779	255.602	255.643	700.678	42.85	43.4264	740.981	101.95	102.225	739.591	113.226	113.808	81.0239	0.998791
Mudtank	2016	SE23A063	ok	0.00561024	1223.15	18.0093	0.521118	8.78184	0.237367	0.0672232	0.00401139	1.05498	0.0691108	0.113871	0.00307786	0.412605	0.0340491	0.00231271	843.791	248.326	248.366	695.192	37.5811	38.2269	731.348	95.8195	96.1044	676.752	91.9336	92.5334	82.3892
Mudtank	2016	SE23A064	ok	-0.000755706	1124.39	16.2326	0.517544	8.58328	0.257895	0.0624406	0.00455378	1.0026	0.0790814	0.116506	0.00350056	0.380927	0.0341227	0.00295452	688.306	311.203	311.225	710.419	42.6909	43.2856	705.127	111.236	111.464	678.19	117.442	117.914	103.213	0.97368
Mudtank	2016	SE23A071	ok	0.0165902	1086.07	15.1274	0.517696	8.50299	0.255947	0.0769017	0.00472888	1.24645	0.0853379	0.117606	0.00354003	0.439655	0.0399439	0.00290266	1117.77	245.384	245.455	716.768	43.1506	43.7495	821.804	112.529	112.835	791.648	115.055	115.712	64.1246
Mudtank	2016	SE23A077	ok	0.00195401	1233.53	17.7296	0.518343	8.48595	0.235062	0.0648994	0.00389715	1.05403	0.069703	0.117842	0.00326423	0.418874	0.0349496	0.00262049	770.161	252.849	252.882	718.13	39.7846	40.4358	730.876	96.6657	96.9477	694.346	104.123	104.681	93.2441	0.986168
NIST610	2015	AP30C235	ok		38204.3	468.039	0.985813	4.28833	0.048687	0.911892	0.004605	29.3067	0.36416	0.233191	0.00264751	0.913692	0.514414	0.00766168
NIST610	2015	AP30C063	ok		38932.1	449.839	0.994816	4.28057	0.0432455	0.911419	0.00463051	29.3446	0.331837	0.233614	0.00236014	0.893393	0.516177	0.00764421
NIST610	2015	AP30C043	ok		38571	464.709	0.991659	4.29407	0.0442618	0.910744	0.00487326	29.2307	0.339478	0.232879	0.00240044	0.887538	0.517593	0.00770028
NIST610	2015	AP30C002	ok		41396.8	466.573	0.987513	4.28697	0.0476594	0.910609	0.00476848	29.2748	0.359753	0.233265	0.00259327	0.904664	0.528627	0.00784023
NIST610	2015	AP30C081	ok		39018.9	462.244	0.987092	4.26068	0.0449954	0.911005	0.00447233	29.4683	0.343185	0.234705	0.00247862	0.906809	0.523077	0.0078214
NIST610	2015	AP30C001	ok		44207.7	451.055	0.992504	4.23477	0.0410024	0.909962	0.00402263	29.6146	0.315211	0.236141	0.00228639	0.909672	0.527469	0.00784017
NIST610	2015	AP30C260	ok		38184.8	458.004	0.989588	4.26103	0.0433726	0.908876	0.00447259	29.397	0.332364	0.234685	0.00238884	0.900307	0.508913	0.00763109
NIST610	2015	AP30C159	ok		38444.3	464.798	0.987481	4.27084	0.0445769	0.908256	0.00446716	29.3094	0.338181	0.234146	0.0024439	0.904597	0.517155	0.00768009
NIST610	2015	AP30C024	ok		40036.1	480.223	0.989013	4.26604	0.0426071	0.908092	0.00457243	29.3371	0.328135	0.234409	0.00234117	0.89294	0.524202	0.00777079
NIST610	2015	AP30C261	ok		38413.8	453.572	0.988444	4.21526	0.0502812	0.909332	0.00495184	29.731	0.389851	0.237233	0.0028298	0.909687	0.515091	0.00773455
NIST610	2015	AP30C179	ok		38233.9	464.564	0.995349	4.25456	0.0449107	0.907464	0.00446779	29.3959	0.342392	0.235042	0.00248108	0.906272	0.511086	0.00759839
NIST610	2015	AP30C200	ok		38891.3	460.991	0.994961	4.25629	0.0451536	0.906999	0.00491361	29.3689	0.349838	0.234946	0.00249247	0.890597	0.511289	0.00761526
NIST610	2015	AP30C139	ok		38790.9	457.336	0.9892	4.24821	0.0421263	0.907187	0.00427361	29.4308	0.323101	0.235393	0.00233421	0.903255	0.522121	0.00774554
NIST610	2015	AP30C101	ok		38453.4	448.032	0.993864	4.22931	0.0479337	0.907043	0.00485792	29.5577	0.370519	0.236445	0.0026798	0.904133	0.517038	0.00781077
NIST610	2015	AP30C220	ok		39080.1	472.958	0.995485	4.2064	0.0440581	0.907578	0.0050292	29.7362	0.352362	0.237733	0.00249004	0.883919	0.512034	0.00755647
NIST610	2015	AP30C121	ok		38605.8	461.079	0.988345	4.25365	0.0426701	0.905276	0.00500831	29.3313	0.336015	0.235092	0.0023583	0.875659	0.518594	0.00771249
NIST610	2016	Fe04A026	ok		32239.5	458.471	0.996041	4.35664	0.0537968	0.920894	0.00540137	29.132	0.398247	0.229535	0.00283434	0.903279	0.487394	0.00871681
NIST610	2016	Fe04A002	ok		33818.1	469.684	0.977467	4.30643	0.0541373	0.915292	0.00529494	29.2924	0.405362	0.232211	0.00291919	0.90843	0.500164	0.00908345
NIST610	2016	Fe04A175	ok		31804.1	468.371	0.973945	4.3473	0.06125	0.913082	0.00571702	28.9469	0.446297	0.230028	0.0032409	0.913827	0.528345	0.00974239
NIST610	2016	Fe04A083	ok		31807	459.695	1.00049	4.26898	0.0589068	0.915406	0.00576457	29.553	0.448254	0.234248	0.00323234	0.909742	0.500573	0.00907962
NIST610	2016	Fe04A064	ok		33475.4	466.823	0.989575	4.21819	0.0552662	0.911462	0.00562936	29.78	0.431352	0.237068	0.00310604	0.904536	0.504315	0.00910538
NIST610	2016	Fe04A146	ok		31166.7	457.825	1.01003	4.25882	0.0642023	0.910126	0.00541743	29.4527	0.477362	0.234807	0.00353975	0.93012	0.507328	0.00903087
NIST610	2016	Fe04A111	ok		32354.4	449.618	0.977575	4.27188	0.0606641	0.908258	0.00517041	29.3023	0.448306	0.234089	0.00332425	0.928198	0.512239	0.00928769
NIST610	2016	Fe04A174	ok		31800.9	459.046	0.991056	4.29273	0.0601432	0.907199	0.00542505	29.126	0.443685	0.232952	0.00326377	0.919726	0.523463	0.00946862
NIST610	2016	Fe04A128	ok		32651.6	467.392	0.99587	4.25011	0.0526354	0.907737	0.00556334	29.4355	0.406741	0.235288	0.00291392	0.896256	0.512184	0.00931969
NIST610	2016	Fe04A001	ok		35515.6	454.485	0.992502	4.21644	0.0511944	0.901365	0.00553446	29.4624	0.400861	0.237167	0.00287959	0.892381	0.496522	0.00910979
NIST610	2016	Fe04A045	ok		34078.8	459.122	0.995477	4.21756	0.0624223	0.899876	0.00545439	29.4059	0.470306	0.237104	0.00350928	0.925405	0.500716	0.00914114
NIST610	2016	SE23A089	ok		53214.5	465.941	0.991869	4.35512	0.0488378	0.912829	0.00370384	28.8869	0.344487	0.229615	0.00257487	0.940337	0.497718	0.00705533
NIST610	2016	SE23A022	ok		53974	480.887	0.991561	4.32148	0.0515994	0.912622	0.0040661	29.1052	0.370927	0.231402	0.00276298	0.9369	0.506622	0.00709928
NIST610	2016	SE23A112	ok		52228.1	459.59	0.988523	4.30898	0.0495248	0.910471	0.00406564	29.1208	0.35907	0.232073	0.00266731	0.93212	0.500049	0.00706074
NIST610	2016	SE23A144	ok		53105.3	460.493	0.986205	4.3223	0.0477714	0.909609	0.00397987	29.0036	0.344761	0.231358	0.00255704	0.929792	0.497928	0.00685461
NIST610	2016	SE23A143	ok		52013.4	458.121	0.995199	4.30676	0.0487986	0.909817	0.00390596	29.1149	0.352779	0.232193	0.00263092	0.935127	0.499045	0.00709443
NIST610	2016	SE23A002	ok		52322.6	440.754	0.98929	4.31733	0.0512097	0.908592	0.00428604	29.0045	0.370243	0.231625	0.00274739	0.929213	0.508798	0.00724776
NIST610	2016	SE23A001	ok		53823.5	464.364	0.988938	4.29475	0.050958	0.909221	0.00382996	29.1772	0.367362	0.232842	0.00276272	0.942375	0.514547	0.00733136
NIST610	2016	SE23A044	ok		55371.3	462.476	0.99414	4.25185	0.0506796	0.906643	0.00389003	29.388	0.372292	0.235192	0.00280335	0.940898	0.505691	0.00708398
NIST610	2016	SE23A066	ok		55489.4	461.273	0.990012	4.28294	0.0475797	0.902693	0.00414249	29.0476	0.349141	0.233484	0.0025938	0.924247	0.503081	0.0113502
OG-1	2015	AP30C146	ok	0.00292122	44244.1	124.284	1.01779	1.40449	0.0146329	0.301643	0.00231909	29.5997	0.383264	0.712003	0.00741812	0.804639	0.186476	0.00331978	3478.01	23.8044	30.0885	3466.01	72.2223	80.2063	3473.62	89.9545	96.5664	3456.03	123.054	134.269	99.655	0.989466
OG-1	2015	AP30C147	ok	-0.0069427	61037.3	176.052	0.595368	1.38845	0.0119389	0.299289	0.00181247	29.7078	0.312443	0.720225	0.00619297	0.817582	0.192371	0.00335543	3465.87	18.7671	26.2396	3496.89	60.1372	69.6797	3477.2	73.1407	81.1503	3556.21	124.058	135.816	100.895	0.995288
OG-1	2015	AP30C148	ok	-0.0128712	60470.9	173.532	0.850512	1.38606	0.0119193	0.295186	0.00177597	29.3512	0.308044	0.72147	0.00620421	0.819373	0.186786	0.00306843	3444.47	18.674	26.0939	3501.55	60.2225	69.7771	3465.34	72.7382	80.7356	3461.32	113.722	125.807	101.657	1.0273
OG-1	2015	AP30C149	ok	-0.00644831	52615.3	149.096	0.849518	1.3833	0.015073	0.301707	0.00217528	30.0594	0.392749	0.722908	0.0078771	0.833965	0.193192	0.00339943	3478.33	22.323	28.9318	3506.94	76.426	84.1834	3488.76	91.1666	97.7517	3570.13	125.641	137.351	100.822	1.04922
OG-1	2015	AP30C150	ok	-0.00136034	45693	132.673	0.631193	1.39611	0.0131034	0.301115	0.00202457	29.7251	0.343189	0.716275	0.00672268	0.81293	0.196994	0.00365352	3475.29	20.8218	27.7794	3482.07	65.3627	74.166	3477.77	80.3045	87.6643	3634.43	134.811	146.169	100.195	1.05412
OG-1	2016	SE23A096	ok	-0.0158656	134523	257.544	1.12902	1.36567	0.0141721	0.300812	0.0016467	30.3571	0.356173	0.732241	0.00759877	0.884482	0.188383	0.00302426	3473.73	16.9546	25.006	3541.76	73.5087	81.6964	3498.44	82.0927	89.3878	3488.5	112.007	124.443	101.958	1.05604
OG-1	2016	SE23A097	ok	-0.00687563	87129.2	197.897	1.0792	1.39247	0.0135407	0.297805	0.00177538	29.4752	0.336199	0.718147	0.00698342	0.852541	0.191157	0.00287353	3458.17	18.485	26.0099	3489.1	67.8575	76.4062	3469.48	79.1468	86.571	3535.62	106.297	119.664	100.894	1.03304
OG-1	2016	SE23A099	ok	-0.00605753	65791.7	149.587	1.05312	1.39745	0.0175371	0.296614	0.00211385	29.2528	0.422167	0.715588	0.00898015	0.869566	0.187085	0.00341885	3451.95	22.1076	28.6769	3479.49	87.3305	94.0909	3462.04	99.9262	105.879	3466.41	126.693	137.674	100.798	1.02981
OG-1	2016	SE23A100	ok	-0.0238258	51842.1	109.116	0.857102	1.35415	0.0117826	0.298938	0.00171092	30.4247	0.316864	0.73847	0.0064255	0.835464	0.192984	0.00305193	3464.06	17.7387	25.5073	3564.9	62.0371	71.6662	3500.63	72.9159	81.0509	3566.61	112.808	125.694	102.911	1.01621
OG-1	2016	SE23A102	ok	-0.0119348	42753.9	93.5175	0.794826	1.37317	0.0134253	0.301078	0.00189694	30.2181	0.351471	0.728241	0.00711993	0.840578	0.196915	0.00324522	3475.11	19.5118	26.8108	3526.86	68.9634	77.5632	3493.93	81.2768	88.6208	3633.1	119.749	132.397	101.489	0.999281
OG-1	2016	SE23A120	ok	-0.0113073	97925.1	205.012	1.14028	1.37795	0.0142382	0.2997	0.0016439	29.9754	0.350668	0.725716	0.00749873	0.883264	0.194304	0.00289279	3468	16.9956	25.0116	3517.44	72.6904	80.8534	3486.01	81.5622	88.8508	3588.96	106.864	120.549	101.426	1.05472
Penglai	2015	AP30C184	ok	0.371382	13.3708	27.6202	0.601203	998.171	308.856	0.339532	0.170635	0.04688	0.0276675	0.00100183	0.000309989	0.524287	0.000597181	0.00082528	3660	1536.18	1536.3	6.45499	3.99463	3.99516	46.5191	54.9089	54.9109	12.0668	33.3515	33.352	0.176366	0.926994
Penglai	2015	AP30C185	ok	0.230662	22.1409	60.3078	0.622419	1289.53	267.792	0.22833	0.0372966	0.024403	0.0064475	0.000775474	0.000161039	0.785989	5e-05	6.79944e-05	3039.68	523.388	523.635	4.99709	2.07545	2.07606	24.4809	12.9361	12.9385	1.01059	2.74857	2.74861	0.164395	0.909113
Penglai	2015	AP30C186	ok	0.288994	20.3003	62.9505	0.639845	1455.23	322.291	0.274386	0.226064	0.0259861	0.0221697	0.000687174	0.000152189	0.259595	0.00019187	0.000278183	3330.59	2579.12	2579.18	4.42829	1.96147	1.96198	26.0488	44.4465	44.4473	3.87775	11.2443	11.2445	0.132958	0.8997
Penglai	2015	AP30C187	ok	0.195661	23.8675	64.3145	0.639372	1294.65	237.238	0.200684	0.256237	0.0213634	0.0275568	0.000772408	0.00014154	0.142061	0.00023932	0.000301596	2831.06	4165.95	4165.98	4.97734	1.82414	1.82483	21.4636	55.372	55.3724	4.8366	12.1904	12.1906	0.175812	0.959664
Penglai	2015	AP30C188	ok	0.113258	11.0145	60.7571	0.621315	2589.09	884.441	0.135537	0.129763	0.00721478	0.00733393	0.000386236	0.000131939	0.336053	0.000180408	0.000308018	2170.17	3336.59	3336.61	2.48936	1.70074	1.70093	7.29947	14.84	14.8402	3.64612	12.4504	12.4505	0.114708	0.964458
Penglai	2015	AP30C189	ok	0.142803	24.2783	66.7775	0.653571	1308.28	277.083	0.158932	0.126797	0.0167426	0.01382	0.000764361	0.000161885	0.25658	5e-05	6.61636e-05	2443.6	2701.15	2701.18	4.9255	2.08636	2.08695	16.8594	27.8329	27.8334	1.01059	2.67456	2.67461	0.201568	0.962422
Penglai	2015	AP30C190	ok	0.154836	28.9043	67.922	0.656447	1083.88	175.666	0.168463	0.0444596	0.0214208	0.00663412	0.000922609	0.000149528	0.523308	0.000219969	0.000234952	2541.7	884.825	884.927	5.94478	1.92695	1.92788	21.5206	13.3301	13.3318	4.44558	9.49677	9.49702	0.233889	0.931443
Penglai	2015	AP30C191	ok	0.101113	22.6392	68.489	0.646478	1421.93	293.394	0.125994	0.0419646	0.0122119	0.00478467	0.000703271	0.00014511	0.526632	9.86856e-05	0.000191737	2042.04	1177.6	1177.65	4.53198	1.87022	1.87078	12.3247	9.65769	9.65849	1.99456	7.75047	7.75053	0.221934	0.952241
Penglai	2015	AP30C192	ok	0.088089	19.0609	70.5309	0.66432	1754.75	426.769	0.115687	0.0441419	0.00908621	0.00411135	0.000569883	0.0001386	0.537497	0.000171197	0.000221358	1889.83	1373.32	1373.36	3.67265	1.78644	1.78682	9.18432	8.31149	8.31201	3.45997	8.94752	8.94768	0.194338	0.951588
Penglai	2015	AP30C193	ok	0.495684	16.1391	45.0941	0.615755	1319	303.685	0.437656	0.186908	0.0457298	0.0221869	0.000758148	0.000174555	0.474547	5e-05	6.74647e-05	4043.14	1273.65	1273.83	4.88548	2.24965	2.25019	45.4029	44.0567	44.059	1.01059	2.72715	2.7272	0.120834	0.943782
Penglai	2016	SE23A008	ok	0.27671	17.4618	35.6243	0.565865	1359.77	347.359	0.264694	0.178005	0.0268281	0.0192996	0.000735418	0.000187865	0.355103	-8.00617e-05	-0.000259217	3274.18	2114.36	2114.43	4.73907	2.42123	2.4217	26.8818	38.6765	38.6774	-1.61829	-10.4791	-10.4792	0.144741
Penglai	2016	SE23A012	ok	0.385407	14.5463	34.0317	0.558364	1474.72	395.194	0.350535	0.0981448	0.0327593	0.0126963	0.000678096	0.000181716	0.691448	0.00052861	0.000408662	3708.66	853.01	853.236	4.36981	2.34204	2.34245	32.73	25.3699	25.372	10.6816	16.5156	16.5164	0.117827
Penglai	2016	SE23A021	ok	0.0137963	20.5031	38.3881	0.539368	1162.92	250.196	0.0570475	0.172576	0.00676079	0.020504	0.000859901	0.000185002	0.0709395	0.000219758	0.000424305	492.412	13340.7	13340.7	5.54089	2.38417	2.38483	6.84169	41.4986	41.4987	4.44131	17.1504	17.1505	1.12526	0.971379
Penglai	2016	SE23A029	ok	0.163519	21.5723	35.7538	0.555417	1049.49	239.644	0.175327	0.0287502	0.023024	0.00647257	0.000952841	0.000217574	0.812252	5e-05	4.72544e-05	2608.43	546.222	546.397	6.13948	2.80381	2.80449	23.1131	12.9952	12.9973	1.01059	1.91019	1.91025	0.235371	0.980383
Penglai	2016	SE23A033	ok	0.239263	16.478	34.5116	0.564793	1300.99	338.842	0.235123	0.0926635	0.0249076	0.0117661	0.000768643	0.000200192	0.551341	5e-05	0.000196224	3086.56	1257.88	1257.98	4.95309	2.58005	2.58053	24.9809	23.6015	23.6029	1.01059	7.93205	7.93206	0.160473
Penglai	2016	SE23A072	ok	0.258043	16.1246	37.2986	0.543139	1423.47	352.6	0.249943	0.028642	0.0241995	0.00660474	0.000702511	0.000174016	0.907585	5e-05	0.0005977	3183.72	362.87	363.261	4.52709	2.24277	2.24323	24.2792	13.253	13.2552	1.01059	24.1611	24.1611	0.142195	0.975672
Penglai	2016	SE23A073	ok	0.0138502	22.6864	40.4376	0.538319	1111.49	218.8	0.0570952	0.166707	0.00707958	0.020718	0.000899696	0.000177108	0.067267	5e-05	0.000138295	494.254	12872.1	12872.2	5.7972	2.28239	2.28314	7.16316	41.9252	41.9252	1.01059	5.59034	5.59036	1.17292	0.974864
Penglai	2016	SE23A075	ok	0.00916168	12.9159	35.272	0.559461	1658.38	507.47	0.0533544	0.108131	0.00443404	0.00908816	0.000602999	0.00018452	0.149297	5e-05	0.000310093	342.912	9173.77	9173.77	3.88601	2.37827	2.37859	4.49229	18.4151	18.4152	1.01059	12.535	12.535	1.13324	0.972206
Penglai	2016	SE23A078	ok	0.258079	16.512	34.3709	0.558659	1267.69	323.631	0.249989	0.118623	0.0271782	0.0146444	0.000788839	0.000201385	0.473792	0.000106364	0.000395521	3184.01	1502.54	1502.64	5.08318	2.5954	2.5959	27.228	29.3424	29.3437	2.14973	15.9879	15.9879	0.159647	0.977315
Penglai	2016	SE23A082	ok	0.238439	14.1869	33.823	0.553166	1472.93	403.568	0.234455	0.128689	0.0219376	0.0134581	0.000678918	0.000186016	0.446622	0.000205185	0.000315487	3082.01	1752.55	1752.62	4.3751	2.39746	2.39787	22.0342	27.0347	27.0356	4.14682	12.7521	12.7523	0.141956	0.977216
Penglai	2016	SE23A084	ok	0.382756	17.1384	35.0938	0.561081	1253.09	320.352	0.348469	0.166493	0.0383262	0.0207682	0.00079803	0.000204017	0.471783	0.000668291	0.000405589	3699.65	1456.51	1456.64	5.14238	2.6293	2.62981	38.1885	41.3873	41.3891	13.5031	16.3902	16.3916	0.138996	0.994942
Penglai	2016	SE23A086	ok	0.157405	18.0225	29.5387	0.612481	1010.04	254.66	0.170504	0.0255342	0.0232654	0.0068226	0.000990063	0.000249624	0.859772	0.000437907	0.000392701	2561.87	501.101	501.284	6.3792	3.21676	3.2174	23.3527	13.6964	13.6984	8.84913	15.8713	15.8719	0.249006	0.990408
Plesovice	2016	SE23A007	ok	0.000556433	17893.5	544.507	0.0896322	18.4475	0.185238	0.0537159	0.0011031	0.401309	0.00917363	0.054208	0.000544323	0.439269	0.0164388	0.000731676	358.174	92.705	92.7244	340.305	6.83426	7.64454	342.597	15.663	16.0414	329.564	29.3371	29.781	95.011	1.00992
Plesovice	2016	SE23A009	ok	0.00245043	24195.8	701.916	0.091632	18.4208	0.179156	0.0552521	0.000926184	0.413383	0.00801135	0.0542864	0.000527975	0.501844	0.0173163	0.000712754	421.469	74.8365	74.8697	340.784	6.62875	7.4636	351.309	13.6167	14.0723	347.005	28.5661	29.0708	80.8563	1.01488
Plesovice	2016	SE23A011	ok	-0.00152152	24081	678.385	0.0929983	18.3024	0.177883	0.0521045	0.000929205	0.392355	0.00796873	0.0546377	0.000531031	0.478539	0.0171162	0.000661746	289.003	81.5039	81.5183	342.932	6.66599	7.50661	336.089	13.6519	14.0684	343.03	26.5244	27.055	118.66	1.01943
Plesovice	2016	SE23A013	ok	-0.00164906	14885.8	442.474	0.0841125	18.2877	0.183551	0.0520081	0.000932762	0.391943	0.00805537	0.0546815	0.00054883	0.488354	0.0173436	0.000809846	284.769	82.0298	82.0437	343.2	6.88928	7.70678	335.788	13.8025	14.2138	347.547	32.4569	32.9035	120.518	1.01047
Plesovice	2016	SE23A015	ok	0.00173164	24523.8	679.391	0.0928907	18.1898	0.203089	0.054773	0.000919586	0.415003	0.00836752	0.0549759	0.000613806	0.553749	0.0160993	0.000650934	401.995	75.2089	75.2389	344.998	7.70382	8.45024	352.471	14.2135	14.6533	322.812	26.1041	26.582	85.8216	1.03097
Plesovice	2016	SE23A018	ok	0.000172829	15600	459.272	0.0843421	18.3249	0.193529	0.0534592	0.00100301	0.402063	0.00865654	0.0545707	0.000576322	0.490519	0.0181207	0.000805865	347.354	84.8606	84.8805	342.522	7.23476	8.01418	343.144	14.776	15.1777	362.98	32.285	32.7743	98.609	1.01895
Plesovice	2016	SE23A053	ok	0.00179002	24035.4	683.377	0.0919381	18.4339	0.184769	0.0547148	0.000854729	0.409072	0.00759266	0.0542478	0.000543744	0.54003	0.0169431	0.000669263	399.613	70.0081	70.04	340.548	6.82685	7.63902	348.207	12.9259	13.3967	339.59	26.828	27.3423	85.2194	1.05164
Plesovice	2016	SE23A062	ok	0.00237469	23586	690.322	0.0912219	18.5912	0.173719	0.0551193	0.000910877	0.408609	0.00775718	0.0537888	0.000502609	0.492201	0.0180512	0.000739728	416.092	73.8463	73.8791	337.741	6.31179	7.16899	347.873	13.2083	13.6685	361.601	29.6364	30.1647	81.1697	1.04486
Plesovice	2016	SE23A074	ok	0.000874567	17346.3	522.776	0.0875773	18.5988	0.202459	0.0539085	0.00101477	0.39947	0.0086864	0.0537669	0.000585286	0.500607	0.0165578	0.000786862	366.248	84.8561	84.8782	337.607	7.35011	8.09758	341.264	14.8414	15.2372	331.93	31.548	31.9671	92.1799	0.994187
Plesovice	2015	AP30C036	ok	-0.00049847	11376.7	448.694	0.0908226	18.9353	0.234312	0.0526662	0.00117012	0.383329	0.00974857	0.0528114	0.000653508	0.48658	0.0167367	0.000894779	313.454	101.098	101.111	331.759	8.21062	8.86365	329.485	16.7585	17.0863	335.486	35.8716	36.2487	105.84	0.822194
Plesovice	2015	AP30C057	ok	-0.000801077	12514.1	481.597	0.0899243	18.6963	0.200853	0.0525194	0.00126868	0.387148	0.0102353	0.0534866	0.000574603	0.406351	0.0162344	0.000865835	307.098	110.045	110.057	335.892	7.21693	7.96955	332.284	17.5696	17.8878	325.498	34.7199	35.0866	109.376	0.890298
Plesovice	2015	AP30C035	ok	-0.00152861	12453.8	467.859	0.0899282	18.6853	0.20385	0.0519383	0.00128927	0.383089	0.0103874	0.0535181	0.000583864	0.402351	0.0157151	0.000902523	281.697	113.598	113.607	336.084	7.33314	8.07574	329.309	17.8583	18.166	315.168	36.2003	36.5303	119.307	0.916324
Plesovice	2015	AP30C104	ok	0.00147379	11303	439.706	0.0897363	18.6295	0.215797	0.0543781	0.00132519	0.402286	0.0108548	0.0536783	0.00062179	0.429295	0.0155456	0.000977516	385.764	109.48	109.499	337.065	7.80887	8.51399	343.305	18.5267	18.849	311.794	39.2116	39.5099	87.3758	0.780217
Plesovice	2015	AP30C102	ok	0.00188007	12871.2	497.637	0.0903773	18.6043	0.212035	0.0547156	0.00143454	0.40533	0.0115876	0.0537509	0.000612603	0.398665	0.0154949	0.000818364	399.646	117.496	117.515	337.509	7.69323	8.40985	345.507	19.7548	20.0612	310.784	32.8282	33.1818	84.4519	0.905586
Plesovice	2015	AP30C103	ok	0.000472844	11188.9	439.977	0.0894636	18.6244	0.210122	0.0535745	0.00119265	0.39645	0.00989431	0.0536931	0.000605772	0.452058	0.0166888	0.000929746	352.222	100.602	100.619	337.155	7.60765	8.33019	339.07	16.9245	17.2682	334.534	37.2743	37.6353	95.7224	0.763169
Plesovice	2015	AP30C058	ok	-0.002235	11799.3	460.694	0.0898527	18.6085	0.206086	0.0514012	0.00113491	0.380692	0.00940359	0.0537389	0.000595149	0.448351	0.0172248	0.00101921	257.864	101.476	101.485	337.435	7.47409	8.20956	327.547	16.1817	16.517	345.187	40.85	41.2009	130.858	0.82588
Plesovice	2015	AP30C076	ok	-0.000112381	15500.2	613.742	0.0906406	18.792	0.198827	0.0530346	0.0011106	0.388953	0.00912566	0.053214	0.000563024	0.450956	0.016985	0.000732584	329.291	95.0197	95.0357	334.224	7.07242	7.83169	333.605	15.6541	16.0133	340.422	29.3656	29.8385	101.498
Plesovice	2015	AP30C029	ok	0.00102591	16053.5	597.949	0.0904188	18.6309	0.209583	0.054017	0.00113359	0.399585	0.00951437	0.0536743	0.000603792	0.472443	0.0165429	0.000739335	370.778	94.526	94.5463	337.04	7.58286	8.30708	341.347	16.2554	16.6177	331.634	29.6427	30.0876	90.9008
Plesovice	2015	AP30C088	ok	-0.00192357	15322.6	580.339	0.0895632	18.5702	0.187582	0.0516678	0.00105258	0.383455	0.00871932	0.0538496	0.000543947	0.444228	0.0165612	0.000750865	269.737	93.4286	93.4395	338.113	6.8307	7.63149	329.577	14.9884	15.3543	331.997	30.1047	30.5438	125.349
Plesovice	2015	AP30C075	ok	0.0010602	14669.7	578.129	0.0889059	18.4905	0.209652	0.0541033	0.00128608	0.403261	0.0106205	0.0540817	0.000613197	0.430519	0.0160157	0.000789867	374.371	107.003	107.021	339.533	7.69947	8.42381	344.011	18.1201	18.4508	321.148	31.677	32.0679	90.6941
Plesovice	2015	AP30C030	ok	-0.000820493	15809.6	586.347	0.0901218	18.4636	0.193909	0.0526004	0.00118215	0.392631	0.00974	0.0541605	0.000568806	0.423357	0.0167015	0.00075445	310.609	102.317	102.33	340.015	7.14182	7.91943	336.29	16.6847	17.0276	334.786	30.2463	30.6907	109.467
Plesovice	2015	AP30C087	ok	-0.000512932	15586.9	594.308	0.0906646	18.4582	0.192432	0.0528504	0.00122806	0.394613	0.01005	0.0541766	0.000564808	0.409349	0.0174133	0.000754637	321.389	105.584	105.598	340.112	7.09156	7.87457	337.734	17.2028	17.5384	348.933	30.2432	30.7257	105.826
Plesovice	2015	AP30C067	ok	0.00101839	15440	596.944	0.0883248	18.7481	0.208529	0.0539627	0.00112921	0.396687	0.00940074	0.0533387	0.000593268	0.469348	0.0172206	0.000907595	368.511	94.2934	94.3135	334.987	7.45189	8.17916	339.242	16.0788	16.4406	345.103	36.3767	36.7701	90.9028
Plesovice	2015	AP30C109	ok	0.000271427	14896.9	579.434	0.0898342	18.5899	0.196451	0.0534267	0.0012457	0.39609	0.0101395	0.0537927	0.000568463	0.412814	0.0155136	0.000782633	345.976	105.484	105.5	337.765	7.13876	7.90692	338.808	17.3464	17.6813	311.158	31.3946	31.765	97.6268
Plesovice	2015	AP30C052	ok	0.00156065	15186	579.187	0.0875166	18.5274	0.205587	0.0544907	0.00124459	0.405341	0.0102929	0.0539742	0.000598919	0.436983	0.0163839	0.000847275	390.407	102.525	102.546	338.875	7.52057	8.25787	345.514	17.5474	17.8917	328.471	33.9731	34.3546	86.8003
Plesovice	2015	AP30C053	ok	-0.0025524	15129.9	585.311	0.0863069	18.5161	0.214625	0.0511841	0.00113776	0.380975	0.00955084	0.0540069	0.000626007	0.462364	0.0151556	0.0007581	248.126	102.343	102.351	339.075	7.8606	8.56949	327.755	16.4333	16.764	304.03	30.4159	30.7808	136.655
Plesovice	2015	AP30C066	ok	-0.000700745	14900.2	592.678	0.0874064	18.4929	0.203509	0.0526846	0.00124534	0.392637	0.0102375	0.0540749	0.000595081	0.422062	0.0164669	0.000818361	314.246	107.544	107.556	339.491	7.47203	8.21627	336.294	17.5369	17.8635	330.122	32.8124	33.2112	108.034
Plesovice	2015	AP30C108	ok	0.000817001	15065.9	581.93	0.0886376	18.3798	0.211297	0.0539544	0.00107862	0.404574	0.00932993	0.0544075	0.000625477	0.498508	0.0159219	0.000795169	368.167	90.0881	90.1092	341.525	7.85244	8.57187	344.96	15.9103	16.2881	319.283	31.8911	32.2749	92.7636
Plesovice	2015	AP30C095	ok	0.00142193	13586.5	533.218	0.0915805	18.7507	0.219735	0.0542864	0.0012689	0.399011	0.0104331	0.0533313	0.000624976	0.448182	0.0174729	0.000898833	381.972	105.077	105.096	334.941	7.85019	8.54345	340.931	17.8288	18.159	350.117	36.0211	36.4299	87.6875
Plesovice	2015	AP30C111	ok	0.000318507	14270.9	559.704	0.092655	18.7122	0.210956	0.053414	0.00115901	0.393408	0.00961982	0.0534411	0.000602479	0.461044	0.0151425	0.000770057	345.441	98.1755	98.1925	335.613	7.56721	8.28694	336.856	16.474	16.8223	303.769	30.8958	31.2545	97.1551
Plesovice	2015	AP30C110	ok	0.00210583	10316.9	405.196	0.0834588	18.6599	0.240695	0.0548743	0.00136568	0.405294	0.011361	0.0535907	0.000691268	0.460161	0.0139193	0.000922005	406.13	111.406	111.427	336.529	8.68179	9.31914	345.481	19.3687	19.6811	279.401	37.0146	37.2685	82.8625
Plesovice	2015	AP30C096	ok	0.000627135	10629.3	419.905	0.0851232	18.4707	0.208968	0.053763	0.0013747	0.401154	0.0112165	0.0541397	0.000612509	0.404621	0.0153847	0.000889878	360.152	115.389	115.405	339.887	7.69061	8.41716	342.485	19.1522	19.4627	308.591	35.6989	36.0197	94.3734
Plesovice	2015	AP30C071	ok	0.0011862	10339.6	401.898	0.0819275	18.3942	0.223551	0.0542455	0.0013097	0.406439	0.0109861	0.0543649	0.000660713	0.449619	0.0152784	0.000893545	380.279	108.569	108.588	341.264	8.29497	8.97801	346.307	18.7215	19.0461	306.475	35.8479	36.1631	89.7405
Plesovice	2015	AP30C072	ok	-0.00142569	10532.3	401.219	0.0824539	18.3636	0.234491	0.0521555	0.00141012	0.391431	0.0117041	0.0544556	0.000695363	0.427059	0.0158435	0.0010876	291.24	123.517	123.526	341.819	8.72961	9.3831	335.414	20.0582	20.3429	317.723	43.6209	43.8996	117.367
Plesovice	2015	AP30C016	ok	0.00308334	17769.3	660.55	0.0921223	18.6668	0.184869	0.0556583	0.00106904	0.410933	0.00888034	0.0535709	0.000530544	0.458283	0.0172906	0.000799368	437.793	85.506	85.5374	336.408	6.66328	7.47422	349.547	15.1075	15.5154	346.494	32.0378	32.4874	76.8417
Plesovice	2015	AP30C012	ok	-0.000427986	17857.9	664.557	0.09282	18.5898	0.191827	0.0528637	0.00109748	0.391918	0.00908612	0.053793	0.000555088	0.445095	0.0158045	0.000644293	321.961	94.3243	94.3397	337.767	6.9708	7.75562	335.77	15.5688	15.9346	316.947	25.8415	26.307	104.909
Plesovice	2015	AP30C017	ok	0.00114651	19689.6	739.544	0.0983019	18.5409	0.185195	0.0541516	0.00100333	0.402524	0.00847277	0.0539348	0.000538724	0.474531	0.017242	0.000761482	376.38	83.374	83.3978	338.634	6.76485	7.57496	343.477	14.4598	14.8709	345.529	30.5201	30.9891	89.9713
Plesovice	2015	AP30C013	ok	0.00053943	19232	721.03	0.0971698	18.4946	0.183227	0.0536823	0.000971883	0.400036	0.00825584	0.0540699	0.000535673	0.480045	0.0164885	0.000679564	356.763	81.7492	81.771	339.46	6.72609	7.54414	341.674	14.1028	14.5197	330.552	27.247	27.7272	95.1502
Plesovice	2015	AP30C008	ok	0.000620038	18618.9	686.367	0.0937102	18.4394	0.189658	0.0537705	0.00102252	0.401891	0.0086888	0.0542316	0.000557796	0.475742	0.0163837	0.000812959	360.467	85.8115	85.8327	340.449	7.00334	7.7967	343.019	14.832	15.232	328.467	32.5971	32.9946	94.4466
Plesovice	2015	AP30C007	ok	-0.00147081	19508.2	720.234	0.098236	18.419	0.187908	0.0520957	0.00104217	0.389804	0.00875345	0.0542916	0.000553874	0.454303	0.0148183	0.00065317	288.616	91.434	91.4467	340.816	6.9539	7.75395	334.227	15.0108	15.3864	297.313	26.2103	26.6146	118.086
Plesovice	2016	Fe04A170	ok	3.53228e-05	9543.06	476.753	0.0881444	18.7996	0.263288	0.0531505	0.0015223	0.389647	0.0124228	0.0531927	0.000744964	0.439275	0.0166602	0.00111076	334.238	129.846	129.858	334.093	9.35796	9.94379	334.111	21.3044	21.5705	333.966	44.5318	44.8333	99.9566
Plesovice	2016	Fe04A171	ok	0.00331098	9389.48	474.051	0.0890185	18.7171	0.240277	0.0558207	0.00150723	0.411026	0.0122887	0.0534271	0.00068586	0.429376	0.0182003	0.00125775	444.278	120.067	120.09	335.528	8.61454	9.25284	349.614	20.9052	21.2019	364.561	50.3868	50.7045	75.5221
Plesovice	2016	Fe04A008	ok	0.00150473	9669.11	458.667	0.0892981	18.5319	0.245359	0.0544438	0.00168546	0.404893	0.0136328	0.053961	0.000714434	0.39322	0.0166689	0.00111473	388.474	139.01	139.025	338.794	8.97115	9.59736	345.191	23.2453	23.5058	334.139	44.6911	44.9918	87.2116
Plesovice	2016	Fe04A084	ok	0.00338196	9539.98	468.713	0.0905219	18.3591	0.249138	0.0560286	0.00165988	0.420602	0.0137056	0.0544689	0.000739159	0.416449	0.0154889	0.00112869	452.536	131.549	131.571	341.9	9.27936	9.8969	356.481	23.2324	23.5102	310.666	45.2771	45.5339	75.552
Plesovice	2016	Fe04A047	ok	-0.0044695	9613.99	462.207	0.0866693	18.3088	0.261567	0.0497279	0.00150492	0.374328	0.0125272	0.0546185	0.000780302	0.426896	0.0170557	0.001198	181.278	141.04	141.043	342.815	9.79517	10.3851	322.856	21.6093	21.8544	341.827	48.0203	48.3133	189.11
SP07-05	2015	AP30C252	ok	0.00082413	10610	739.528	0.948427	33.9311	0.384765	0.0504897	0.00135141	0.205077	0.00596138	0.0294715	0.000334195	0.390093	0.00900022	0.000200096	216.592	123.939	123.945	187.24	4.24644	4.64585	189.413	11.0121	11.1773	181.101	8.05259	8.53045	86.448	0.971436
SP07-05	2015	AP30C253	ok	-0.0020142	9511.58	662.69	0.90043	34.277	0.454775	0.0481847	0.0015846	0.19374	0.00687031	0.0291741	0.000387072	0.374143	0.00882366	0.000215231	107.321	155.372	155.373	185.377	4.91904	5.26102	179.815	12.753	12.882	177.564	8.66244	9.09151	172.731	1.02207
SP07-05	2015	AP30C254	ok	0.000837161	11000.3	761.338	0.949166	34.5164	0.386695	0.050433	0.00130343	0.201373	0.00567238	0.0289717	0.000324576	0.397721	0.0089335	0.000197163	213.992	119.73	119.736	184.109	4.12523	4.52232	186.287	10.4949	10.6625	179.764	7.93482	8.41244	86.0358	1.00689
SP07-05	2015	AP30C255	ok	0.00307062	15355.3	1055.35	1.17447	33.9872	0.388255	0.052276	0.00126788	0.211982	0.00568305	0.0294228	0.000336113	0.426107	0.00943831	0.00018742	296.51	110.696	110.707	186.935	4.27092	4.667	195.215	10.4671	10.6515	189.875	7.54083	8.09784	63.0451	1.02506
SP07-05	2015	AP30C256	ok	0.00132544	24980.8	1733.88	1.35743	34.3568	0.311792	0.0508407	0.000862114	0.203944	0.00392243	0.0291063	0.000264143	0.471855	0.00907072	0.000157029	232.61	78.2913	78.301	184.953	3.35693	3.83854	188.458	7.24917	7.49537	182.513	6.3192	6.92681	79.512	1.055
SP07-05	2015	AP30C257	ok	0.000726658	19286.7	1345.76	1.28374	33.8501	0.340538	0.0504214	0.000879863	0.205289	0.00413503	0.029542	0.000297198	0.499452	0.00912627	0.000160582	213.456	80.8488	80.8567	187.681	3.77621	4.22234	189.592	7.63768	7.87453	183.626	6.46199	7.06429	87.9249	1.03056
SP07-05	2016	SE23A118	ok	0.0028472	16576.6	1034.79	1.06566	33.8601	0.390314	0.0521126	0.00146679	0.212113	0.00645154	0.0295333	0.000340438	0.378992	0.00918087	0.00020141	289.36	128.629	128.638	187.627	4.32564	4.7199	195.324	11.8818	12.0448	184.719	8.10476	8.59833	64.8419	1.06746
SP07-05	2016	SE23A119	ok	0.0016227	17817.9	1027.27	1.08709	34.0759	0.415992	0.0511102	0.0012795	0.206715	0.00575744	0.0293463	0.000358254	0.43831	0.00905264	0.000176304	244.8	115.327	115.335	186.456	4.55243	4.92408	190.793	10.6279	10.8015	182.151	7.09491	7.639	76.1666	1.029
SP07-05	2016	SE23A122	ok	0.00146958	17873.5	1012.47	1.00379	34.574	0.34892	0.0509312	0.000906747	0.203024	0.00415484	0.0289235	0.000291896	0.493139	0.00910304	0.000163606	236.713	82.1372	82.1468	183.807	3.70996	4.14565	187.681	7.68173	7.9126	183.16	6.58376	7.17297	77.65
SP07-05	2016	SE23A123	ok	0.000594239	28906.9	1649.72	1.2183	34.4661	0.317543	0.0502449	0.00080506	0.200915	0.00371346	0.0290141	0.000267313	0.498477	0.00900489	0.000147305	205.326	74.3453	74.3532	184.375	3.39737	3.87116	185.9	6.87188	7.12426	181.194	5.92805	6.56311	89.7959
SP07-05	2016	SE23A126	ok	0.000691503	65845.2	3505.71	1.34669	33.9501	0.368326	0.0503816	0.000670882	0.204523	0.00351291	0.029455	0.000319558	0.631636	0.0089076	0.000152381	211.629	61.7152	61.7253	187.136	4.06049	4.47608	188.947	6.49072	6.76597	179.245	6.13263	6.73587	88.4265	1.13477
SP07-05	2016	SE23A127	ok	0.00102711	32721.4	1975.32	1.56121	34.4806	0.349554	0.0505886	0.000867589	0.202205	0.00402835	0.0290019	0.000294013	0.508867	0.00916234	0.000143461	221.123	79.3466	79.3552	184.298	3.73673	4.17181	186.99	7.45048	7.68658	184.348	5.77291	6.44496	83.3464	1.0917
Temora	2015	AP30C160	ok	-0.00218175	3507.35	109.628	0.538653	14.8995	0.286923	0.0533945	0.0026647	0.493897	0.0264198	0.0671163	0.00129247	0.359999	0.0193912	0.000840085	344.612	225.833	225.84	418.759	16.1283	16.6699	407.563	43.6031	43.7974	388.188	33.6349	34.1719	121.516	0.992966		April 30, 2015	413.763	Wtd Mean (from internal errs)
Temora	2015	AP30C161	ok	-0.00242732	3243.24	103.372	0.565725	15.3123	0.288022	0.0529278	0.00263644	0.476383	0.025365	0.065307	0.00122841	0.35327	0.0195867	0.000808629	324.716	226.205	226.212	407.819	15.3421	15.8817	395.588	42.1262	42.3156	392.064	32.3724	32.941	125.593	0.990134			7.77058	2-sigma err. of mean
Temora	2015	AP30C162	ok	0.000140462	3502.6	112.541	0.373494	15.0269	0.279847	0.0551878	0.00270063	0.506159	0.026502	0.0665474	0.00123932	0.35568	0.0190677	0.000933471	418.868	218.567	218.578	415.321	15.4692	16.024	415.863	43.5484	43.7509	381.772	37.3798	37.8479	99.1532	0.996079			0.341638	MSWD
Temora	2015	AP30C163	ok	-0.00179912	2908.46	91.8644	0.567148	15.0895	0.278489	0.0535785	0.00279738	0.48936	0.0270992	0.0662713	0.00122309	0.333277	0.0187407	0.000859911	352.389	235.938	235.945	413.652	15.2686	15.8261	404.474	44.797	44.9832	375.285	34.4397	34.9302	117.385
Temora	2015	AP30C164	ok	-0.00152905	2584.17	78.5003	0.523742	14.6316	0.295838	0.0541055	0.00293171	0.509637	0.0294746	0.0683451	0.00138188	0.349602	0.0186064	0.000973887	374.464	243.906	243.914	426.178	17.2338	17.7596	418.205	48.3734	48.5578	372.621	39.0071	39.4348	113.81
Temora	2015	AP30C165	ok	0.000208269	2414.1	77.3127	0.35018	15.4175	0.323727	0.054992	0.00315271	0.491584	0.0300134	0.0648613	0.00136192	0.343911	0.0194008	0.00128899	410.924	256.419	256.428	405.122	17.013	17.4948	405.989	49.575	49.7446	388.378	51.6077	51.9596	98.588	0.97606
Temora	2016	Fe04A147	ok	0.00264706	2839.02	117.908	0.242737	15.3235	0.317068	0.0570222	0.00289074	0.512858	0.0280816	0.0652591	0.00135031	0.377893	0.0215481	0.001614	491.433	223.6	223.615	407.53	16.8649	17.3565	420.369	46.0347	46.2305	430.909	64.5522	64.8988	82.9269			February 4, 2016	415.902	Wtd Mean (from internal errs)
Temora	2016	Fe04A027	ok	-0.00129847	2387.02	96.9426	0.305086	15.1377	0.355657	0.0539519	0.00288308	0.4912	0.0286737	0.0660601	0.00155206	0.40248	0.019929	0.00156894	368.062	240.815	240.823	412.375	19.3773	19.8168	405.728	47.3686	47.5458	398.849	62.8	63.1052	112.04				9.94928	2-sigma err. of mean
Temora	2016	Fe04A065	ok	-0.00417724	1161.98	47.9383	0.33212	14.6905	0.44555	0.0519221	0.00493423	0.48711	0.0485911	0.0680711	0.00206453	0.304039	0.0226086	0.00213464	280.983	434.945	434.948	424.524	25.7508	26.1029	402.939	80.3895	80.4926	451.881	85.3306	85.6192	151.085				0.890457	MSWD
Temora	2016	Fe04A112	ok	0.00181942	2386.15	93.6047	0.359468	14.6168	0.348616	0.0568253	0.00343226	0.535798	0.034794	0.0684143	0.00163171	0.367275	0.0218665	0.00137826	483.797	266.757	266.769	426.596	20.3489	20.797	435.65	56.5811	56.7523	437.208	55.115	55.5324	88.1765
Temora	2016	Fe04A165	ok	-0.00283215	3068.32	117.619	0.556801	14.5824	0.287761	0.0530855	0.00274317	0.501717	0.0277522	0.0685758	0.00135324	0.356751	0.021299	0.00101811	331.465	234.383	234.39	427.57	16.8749	17.415	412.864	45.6746	45.865	425.979	40.7242	41.259	128.994
Temora	2016	Fe04A005	ok	0.00292639	3590.91	132.969	0.54928	14.3861	0.291584	0.0578864	0.00286916	0.554555	0.0296961	0.0695113	0.00140889	0.378499	0.0201982	0.000928969	524.511	217.384	217.401	433.211	17.561	18.0942	447.976	47.9777	48.191	404.182	37.1789	37.7059	82.5933
Temora	2015	AP30C234	ok	0.0118184	1004.91	32.1476	0.295763	15.0859	0.466988	0.0645913	0.00513519	0.590084	0.0503439	0.0662869	0.00205192	0.362827	0.0186968	0.00207764	760.133	335.305	335.329	413.747	25.6152	25.9515	470.921	80.3548	80.4957	374.415	83.2119	83.4152	54.4308			April 30, 2015	423.854	Wtd Mean (from internal errs)
Temora	2015	AP30C233	ok	-0.00443392	3113.43	98.9846	0.492739	15.2505	0.28798	0.0513449	0.00249918	0.464007	0.0242253	0.0655714	0.0012382	0.361687	0.0194794	0.000972777	255.343	223.807	223.811	409.42	15.4624	16.0021	387.041	40.4139	40.6029	389.936	38.9459	39.4147	160.341				5.88532	2-sigma err. of mean
Temora	2015	AP30C232	ok	-0.000672459	11144.8	342.299	0.298769	14.6002	0.161272	0.0548206	0.00124442	0.517484	0.0130638	0.0684922	0.000756555	0.437551	0.0210593	0.000685535	403.939	101.653	101.675	427.065	9.43461	10.3677	423.469	21.3808	21.8052	421.236	27.4246	28.1954	105.725				1.70014	MSWD
Temora	2015	AP30C231	ok	-0.000788842	18247.1	549.765	0.365333	14.5961	0.156415	0.0547293	0.00108099	0.516768	0.0116125	0.0685115	0.000734184	0.476883	0.0207984	0.000527594	400.206	88.5079	88.5332	427.182	9.15554	10.1149	422.99	19.0103	19.4854	416.07	21.1089	22.0775	106.74
Temora	2016	SE23A005	ok	0.000770898	6887.74	159.366	0.394268	14.7179	0.20431	0.0559065	0.00168709	0.523515	0.0173895	0.0679446	0.000943191	0.417915	0.0216687	0.000707717	447.688	134.11	134.131	423.761	11.7651	12.5144	427.497	28.4001	28.7271	433.294	28.3035	29.0938	94.6553	0.996743		September 23, 2016	420.904	Wtd Mean (from internal errs)
Temora	2016	SE23A025	ok	0.0038463	4568.78	109.801	0.469651	15.0559	0.241727	0.0581653	0.00187608	0.532439	0.0191834	0.0664193	0.00106638	0.445618	0.021864	0.000834811	535.039	141.207	141.235	414.547	13.3113	13.9499	433.427	31.2321	31.538	437.158	33.3832	34.0677	77.4797	0.967125			5.81911	2-sigma err. of mean
Temora	2016	SE23A047	ok	0.00131903	6672.46	158.214	0.275837	14.687	0.189367	0.0563713	0.00150076	0.528976	0.0156474	0.0680873	0.00087788	0.435876	0.0223063	0.000943999	466.058	117.939	117.964	424.622	10.9497	11.7542	431.13	25.5061	25.8759	445.905	37.7412	38.3724	91.1092	0.991789			0.576296	MSWD
Temora	2016	SE23A069	ok	0.00400855	8417.63	202.606	0.374131	14.8903	0.194767	0.0584074	0.00131204	0.540599	0.0140525	0.0671577	0.00087843	0.503193	0.0166518	0.000734634	544.124	98.1921	98.2343	419.009	10.9614	11.7447	438.82	22.8136	23.2409	333.799	29.4526	29.9061	77.0061	0.975525
Temora	2016	SE23A092	ok	0.00873394	4156.81	102.39	0.470012	15.2637	0.261777	0.0619807	0.00234996	0.55964	0.0232882	0.065515	0.0011236	0.412139	0.0226274	0.000864605	672.51	162.208	162.247	409.078	14.0316	14.6232	451.292	37.5591	37.8352	452.253	34.5616	35.2693	60.8285	0.977974
Temora	2016	SE23A115	ok	0.00136224	4411.27	107.34	0.531504	15.2898	0.22489	0.0560052	0.00163185	0.504823	0.0164771	0.0654032	0.000961984	0.450637	0.0200255	0.000715752	451.607	129.402	129.424	408.401	12.014	12.6977	414.962	27.0882	27.4111	400.761	28.648	29.3174	90.4329	0.985956
Temora	2016	SE23A140	ok	-0.000862657	4982.65	120.213	0.275903	14.9482	0.228618	0.0544288	0.00180027	0.501825	0.0182867	0.0668977	0.00102313	0.419699	0.0203589	0.000974251	387.856	148.535	148.549	417.438	12.7686	13.4421	412.937	30.0952	30.3834	407.366	38.988	39.4989	107.627	0.991237
QingHu	2016	SE23A098	ok	-0.00065875	15050.1	934.037	0.502799	39.6725	0.396304	0.0487387	0.000909455	0.169316	0.00358364	0.0252064	0.000251797	0.471967	0.00776833	0.00019075	134.259	87.7196	87.7225	160.477	3.20613	3.59001	158.825	6.7232	6.91228	156.409	7.68115	8.05673	119.528	1.0035
QingHu	2016	SE23A103	ok	0.00101913	16287.3	1078.22	0.439554	40.3003	0.404464	0.0500237	0.000937616	0.171073	0.00363723	0.0248137	0.000249037	0.472044	0.00767234	0.000166402	195.084	87.1322	87.1383	158.007	3.17161	3.548	160.349	6.81847	7.00853	154.483	6.70106	7.11831	80.9945	1.00699
QingHu	2016	SE23A104	ok	0.00156367	16113.3	1028.59	0.426605	39.595	0.418017	0.0505163	0.00103926	0.175834	0.0040659	0.0252557	0.000266633	0.456563	0.00796477	0.0001919	217.812	95.2404	95.2473	160.787	3.39496	3.76095	164.47	7.60622	7.78584	160.348	7.72672	8.11877	73.8192	1.00454
QingHu	2016	SE23A106	ok	0.000524352	15774.5	1044.27	0.466393	40.2566	0.38878	0.0496331	0.00096043	0.169921	0.00367482	0.0248407	0.0002399	0.446557	0.00770553	0.000167058	176.831	90.2561	90.2609	158.177	3.0552	3.44512	159.35	6.89244	7.07821	155.149	6.72735	7.14655	89.4509	1.00627
QingHu	2016	SE23A108	common Pb in 2nd half	0.00164215	17635	1003.8	0.328745	39.3957	0.566182	0.0505958	0.00142406	0.177002	0.00559373	0.0253834	0.000364802	0.45476	0.00808038	0.000281939	221.451	130.213	130.218	161.59	4.64463	4.92115	165.477	10.4591	10.592	162.666	11.3514	11.6296	72.9686	1.0437
QingHu	2016	SE23A109	ok	0.000639127	13658.3	853.901	0.419723	40.1092	0.45445	0.0497366	0.00103679	0.170901	0.00405478	0.0249319	0.000282486	0.47755	0.00845588	0.000199424	181.688	97.143	97.1477	158.751	3.59739	3.93627	160.2	7.6018	7.77242	170.194	8.02773	8.4524	87.3752	1.00319
QingHu	2016	SE23A111	ok	2.1494e-05	10203.4	650.025	0.586932	39.4467	0.428822	0.0492999	0.00125708	0.172245	0.00477451	0.0253507	0.000275585	0.39218	0.00775317	0.000182216	161.101	119.276	119.279	161.384	3.50878	3.86652	161.366	8.94588	9.09341	156.105	7.33759	7.7284	100.175	0.985398
QingHu	2016	SE23A117	ok	0.000720831	7682.79	509.152	0.454718	39.9846	0.511466	0.049812	0.00155528	0.171693	0.00579322	0.0250096	0.000319912	0.379103	0.00750945	0.000232856	185.217	145.408	145.411	159.239	4.07384	4.37779	160.888	10.8572	10.9784	151.216	9.37789	9.66797	85.9745	0.97679
QingHu	2016	SE23A138	ok	-0.00047197	11352.6	696.287	0.393569	39.209	0.466371	0.048927	0.00126984	0.171979	0.00490992	0.0255044	0.000303361	0.416626	0.00766271	0.000232432	143.314	121.804	121.807	162.35	3.86214	4.1936	161.135	9.20065	9.34376	154.29	9.36012	9.66248	113.283	0.99106
1 concentration uncertainty c.10%
2 data not corrected for common-Pb
3 data not corrected for common-Pb
4 Concordance calculated as (206Pb-238U age/207Pb-206Pb age)*100
Decay constants of Jaffey et al. (1971) used for 235U and 238U, while 232Th decay constants are from Amelin & Zaitsev 2002.
bd = below detection; NA = not available
Uncertainties quoted without components related to systematic error unless otherwise stated
Total systematic uncertainties (ssys): 206Pb/238U = 1.01%, 207Pb/206Pb = 0.28%, 207Pb/235U= 1.05%, and 208Pb/232Th = 2.42% (2s)
							91500 - errors from TIMS in Horstwood et al. 2016 and Wiedenbeck 1995 (208Pb/232Th age only). NIST610 errors for 7/6Pb ratios are from Baker et al. 2004. All 2 sigma
Systematic Errors:							76 error %	206/238 error %	207/235 error%	208/232 error %
1) Uncertaintly in Primary Ref. Material.							0.00549535	0.04	0.06	0.26465
2) Long Term variance in secondary stds.							0.5	1	1	1.5
3)Decay constant errors							0.173046	0.107	0.136	0.31		Decay constant errors from Jaffey et al. 1971 and Amelin and Zaitsev 2002 (232Th)
4) Model common Pb uncertainty							No correction applied	No correction applied	No correction applied	No correction applied
Total systematic uncertainty							0.279975	1.01305	1.0221	2.41614

## Sheet: Laser Fluence Tests
2015, Dept. E.Sci, Uni. of Tasmania								Data for Tera-Wasserburg plot2					Data for Wetherill plot3									Dates3										Ablation rate relative to average of primary standard (91500)
Identifier	Year	File number	Comments	f206c	206Pb cps	Uppm1	Th/U	238U/206Pb	1s	207Pb/206Pb	1s	207Pb/235U	1s	206Pb/238U	1s	Rho	208Pb/232Th	1s	207Pb/206Pb	2s	2ssys	206Pb/238U	2s	2ssys	207Pb/235U	2s	2ssys	208Pb/232Th	2s	2ssys	% conc4
	Analysed								abs		abs		abs		abs			abs		abs	abs		abs	abs		abs	abs		abs	abs
1.3 J/cm2																																								91500 - errors from TIMS in Horstwood et al. 2016 and Wiedenbeck 1995 (208Pb/232Th age only). NIST610 errors for 7/6Pb ratios are from Baker et al. 2004. All 2 sigma
91500_1.26	2014	SE01B042	ok	-0.000812681	4719.95	78.4125	0.366601	5.63941	0.108534	0.0737147	0.00229876	1.80149	0.066016	0.177323	0.0034127	0.525189	0.0525512	0.00160262	1032.79	126.033	126.151	1052.34	40.5057	41.8677	1046	76.6617	77.3876	1035.21	63.1401	65.1582	101.893		Systematic Errors:							76 error %	206/238 error %	207/235 error%	208/232 error %
91500_1.26	2014	SE01B033	ok	-0.000384743	4900.67	80.2119	0.370758	5.62388	0.101033	0.0741726	0.00237388	1.81769	0.066713	0.177813	0.0031944	0.48948	0.05216	0.00170921	1045.29	129.104	129.222	1055.02	37.9066	39.3658	1051.85	77.2104	77.9393	1027.69	67.3523	69.2208	100.931		1) Uncertaintly in Primary Ref. Material.							0.00549535	0.04	0.06	0.26465
91500_1.26	2014	SE01B003	ok	0.00224264	4930.32	82.1269	0.369773	5.58858	0.100337	0.076605	0.00285782	1.88916	0.0782138	0.178936	0.00321262	0.433656	0.0523915	0.00173254	1110.06	149.038	149.154	1061.16	38.1041	39.5727	1077.28	89.2024	89.8648	1032.14	68.2642	70.1241	95.5953		2) Long Term variance in secondary stds.							0.5	1	1	1.5
91500_1.26	2014	SE01B022	ok	0.00170862	4740.69	78.9228	0.367811	5.5726	0.0965467	0.0762613	0.00232361	1.88607	0.0661076	0.179449	0.003109	0.494295	0.0521569	0.00168788	1101.07	121.887	122.026	1063.97	36.8669	38.3907	1076.2	75.4425	76.2231	1027.64	66.5119	68.4031	96.6303		3)Decay constant errors							0.173046	0.107	0.136	0.31		Decay constant errors from Jaffey et al. 1971 and Amelin and Zaitsev 2002 (232Th)
91500_1.26	2014	SE01B012	ok	-0.00138933	4913.93	80.6791	0.364105	5.58083	0.108529	0.0736076	0.00208398	1.81776	0.0624352	0.179185	0.00348455	0.566177	0.0544587	0.00193538	1029.85	114.474	114.603	1062.52	41.3249	42.6863	1051.88	72.2584	73.0368	1071.8	76.1805	77.9809	103.172		4) Model common Pb uncertainty							No correction applied	No correction applied	No correction applied	No correction applied
91500_1.26	2014	SE01B002	ok	0.00482224	4997.27	82.2871	0.363007	5.54566	0.0979968	0.0790531	0.00233004	1.96462	0.0675154	0.180321	0.00318644	0.514203	0.0549672	0.0017644	1172.6	116.673	116.837	1068.73	37.7709	39.2727	1103.47	75.8427	76.6588	1081.55	69.4338	71.44	91.1416		Total systematic uncertainty							0.279975	1.01305	1.0221	2.41614
91500_1.26	2014	SE01B021	ok	0.00383946	4810.76	77.8629	0.369215	5.53668	0.0940267	0.078288	0.00229249	1.94876	0.0659674	0.180614	0.00306727	0.501684	0.0547154	0.00172832	1153.33	116.242	116.402	1070.33	36.3537	37.9163	1098.02	74.3381	75.1624	1076.73	68.0219	70.0507	92.8034
91500_1.26	2014	SE01B041	ok	-0.000956228	4965	80.259	0.36111	5.54407	0.102025	0.0742126	0.0022657	1.84485	0.0657639	0.180373	0.00331932	0.516239	0.0537118	0.00166444	1046.38	123.134	123.258	1069.01	39.345	40.7897	1061.59	75.6858	76.443	1057.48	65.5394	67.5693	102.163
91500_1.28	2015	AU31A020	ok	0.000501924	20573.1	93.3222	0.360412	5.62524	0.065783	0.0749077	0.00095814	1.83526	0.0318069	0.17777	0.00207889	0.674759	0.0526235	0.00124063	1065.15	51.4434	51.7512	1054.78	24.6697	26.8571	1058.16	36.6781	38.2064	1036.6	48.8767	51.4641	99.0265
91500_1.28	2015	AU31A013	ok	0.00175449	21188.7	90.88	0.356353	5.60381	0.0702602	0.0760965	0.00112331	1.87152	0.0362469	0.17845	0.00223739	0.647364	0.0532723	0.00142633	1096.74	59.0899	59.3742	1058.5	26.5428	28.6012	1071.07	41.4881	42.8779	1049.05	56.1754	58.4942	96.5136
91500_1.28	2015	AU31A004	ok	0.000189733	20633.5	94.2275	0.361335	5.59485	0.0661974	0.0748416	0.000940547	1.8436	0.0318215	0.178736	0.00211477	0.685485	0.0527758	0.00124301	1063.37	50.5569	50.869	1060.06	25.085	27.2599	1061.15	36.632	38.1706	1039.52	48.967	51.5641	99.6887
91500_1.28	2015	AU31A021	ok	0.00138144	20675.7	93.8506	0.357325	5.5843	0.0669049	0.0759102	0.000941215	1.87346	0.0323017	0.179073	0.00214546	0.694876	0.0551307	0.0012951	1091.83	49.6689	50.0037	1061.91	25.4453	27.5989	1071.75	36.9578	38.5134	1084.68	50.9615	53.6781	97.2596
91500_1.28	2015	AU31A029	ok	0.000597507	20397	89.5955	0.356481	5.59628	0.0676262	0.0751745	0.00104615	1.85133	0.0341211	0.17869	0.00215932	0.655654	0.0546047	0.00127849	1072.3	55.9094	56.1966	1059.81	25.6139	27.7463	1063.9	39.2168	40.6651	1074.6	50.3208	53.0206	98.8361
91500_1.28	2015	AU31A003	ok	0.000544789	20843.2	94.5575	0.365273	5.60418	0.0640693	0.0750791	0.00103664	1.84637	0.033098	0.178438	0.00203998	0.637758	0.0531553	0.00124098	1069.75	55.4926	55.7805	1058.44	24.201	26.442	1062.14	38.0797	39.5647	1046.81	48.8779	51.5152	98.9429
91500_1.28	2015	AU31A030	ok	-0.000335797	21011.1	91.8653	0.361105	5.55682	0.0645567	0.0746492	0.00090295	1.85145	0.0310513	0.179959	0.00209069	0.692702	0.0539765	0.00136911	1058.19	48.6989	49.0197	1066.75	24.7861	27.0117	1063.95	35.6877	37.2734	1062.56	53.9037	56.3772	100.809
91500_1.28	2015	AU31A014	ok	-0.00030737	21079	93.7316	0.357501	5.5529	0.0672302	0.0746989	0.000998427	1.85398	0.0334353	0.180086	0.00218034	0.671344	0.0546837	0.00132298	1059.53	53.8016	54.0929	1067.44	25.8476	27.9915	1064.85	38.4076	39.8878	1076.12	52.0696	54.6904	100.747
91500_1.28	2015	AU31A005	ok	-0.00185004	20804.1	95.1966	0.35996	5.55737	0.0640181	0.0733744	0.00095951	1.81965	0.0317112	0.179941	0.00207283	0.66101	0.0549859	0.00136851	1023.43	52.9253	53.2016	1066.65	24.5746	26.8173	1052.56	36.6861	38.1982	1081.91	53.8538	56.4185	104.223
91500_1.28	2015	AU31A031	ok	-0.000518808	20701.4	91.4107	0.361455	5.55227	0.0654703	0.0745255	0.00104013	1.84989	0.0337994	0.180106	0.00212375	0.645372	0.0522514	0.0012762	1054.86	56.2186	56.495	1067.56	25.1764	27.3735	1063.39	38.8585	40.3183	1029.45	50.287	52.7715	101.204
Mudtank_1.26	2014	SE01B006	ok	0.0244739	815.798	22.0479	0.530635	8.71686	0.308518	0.0828755	0.0072585	1.31032	0.123779	0.11472	0.00406033	0.374674	0.0379466	0.00221032	1265.43	342.085	342.151	700.103	49.5579	50.0563	850.269	160.64	160.87	752.79	87.6976	88.4748	55.3251
Mudtank_1.26	2014	SE01B013	ok	0.00342425	824.597	21.6039	0.520743	8.79997	0.301117	0.0653866	0.00570851	1.02405	0.0960251	0.113637	0.00388842	0.364914	0.0386119	0.00215516	785.888	366.682	366.706	693.834	47.4832	47.994	715.946	134.269	134.464	765.742	85.4812	86.3059	88.2867
Mudtank_1.26	2014	SE01B040	ok	0.0142632	756.971	19.9038	0.515516	8.68824	0.33357	0.0745479	0.00789667	1.18254	0.133238	0.115098	0.00441899	0.340757	0.0350505	0.00234416	1055.46	426.646	426.682	702.287	53.9262	54.3875	792.496	178.582	178.762	696.315	93.1385	93.7653	66.5384
Mudtank_1.26	2014	SE01B032	ok	0.0167304	807.151	20.9229	0.54754	8.60797	0.274534	0.0767646	0.00609774	1.22906	0.105205	0.116171	0.00370506	0.372592	0.0355723	0.00230158	1114.21	317.147	317.202	708.489	45.1918	45.7509	813.91	139.338	139.581	706.503	91.4234	92.0806	63.5866
Mudtank_1.26	2014	SE01B027	ok	0.00179653	863.987	21.9245	0.541258	8.64013	0.297588	0.0644084	0.00542842	1.02739	0.093541	0.115739	0.00398634	0.378292	0.0358033	0.00192563	754.15	355.802	355.825	705.992	48.6323	49.1487	717.62	130.675	130.876	711.011	76.4813	77.2757	93.6142
Mudtank_1.26	2014	SE01B035	ok	0.000230685	840.054	21.4741	0.523182	8.64986	0.284261	0.0630985	0.00556726	1.00536	0.0946575	0.115609	0.00379925	0.349039	0.0354007	0.00228776	710.627	375.123	375.142	705.239	46.3526	46.8929	706.528	133.043	133.235	703.154	90.8822	91.537	99.2419
Mudtank_1.26	2014	SE01B030	ok	0.00379543	861.862	21.9253	0.548067	8.59756	0.294002	0.0661507	0.00511306	1.0604	0.0896262	0.116312	0.00397741	0.404587	0.0379052	0.00207842	810.237	323.378	323.406	709.302	48.5106	49.0331	734.023	124.08	124.302	751.984	82.4656	83.2898	87.5425
Mudtank_1.26	2014	SE01B025	ok	-0.00714613	853.982	22.224	0.539515	8.62884	0.300521	0.0570803	0.00513184	0.911687	0.0879009	0.11589	0.00403618	0.361223	0.0366338	0.00216656	493.678	396.392	396.401	706.866	49.2368	49.7482	657.954	126.874	127.048	727.211	86.0161	86.7557	143.184
Mudtank_1.26	2014	SE01B011	ok	0.0118625	852.773	21.7498	0.52624	8.50784	0.288919	0.0729999	0.00691794	1.18254	0.119043	0.117539	0.00399151	0.33734	0.0343992	0.00217049	1013.07	384.145	384.183	716.381	48.6554	49.1867	792.495	159.557	159.758	683.593	86.2656	86.9176	70.714
Mudtank_1.26	2014	SE01B019	ok	0.00202016	808.707	21.3341	0.530882	8.57561	0.316292	0.0647417	0.0056008	1.04047	0.0978505	0.11661	0.00430089	0.392186	0.0333848	0.00222928	765.037	364.569	364.591	711.021	52.4488	52.9348	724.153	136.205	136.401	663.762	88.6457	89.2441	92.9393
Mudtank_1.26	2014	SE01B038	ok	0.00700755	779.8	19.9777	0.535288	8.47133	0.28607	0.0690933	0.00569911	1.12408	0.100188	0.118045	0.00398629	0.378879	0.036728	0.00187913	900.628	340.201	340.234	719.303	48.5806	49.1171	764.926	136.355	136.574	729.047	74.6012	75.457	79.8667
Mudtank_1.26	2014	SE01B037	ok	0.00320915	850.598	21.9218	0.532334	8.50113	0.312031	0.0658959	0.00591656	1.0683	0.103624	0.117631	0.00431762	0.378402	0.033455	0.00207159	802.159	376.127	376.151	716.916	52.6283	53.1207	737.907	143.153	143.347	665.135	82.3725	83.0188	89.3733
Mudtank_1.26	2014	SE01B018	ok	0.00963111	879.522	22.5879	0.554749	8.41474	0.26194	0.0713911	0.00587049	1.16927	0.102808	0.118839	0.00369931	0.354038	0.034396	0.00216313	967.744	335.644	335.683	723.878	45.0668	45.6519	786.304	138.271	138.499	683.532	85.9733	86.6273	74.8006
Mudtank_1.26	2014	SE01B024	ok	-6.96021e-05	817.37	21.1653	0.529027	8.49597	0.294359	0.0632103	0.00512603	1.02539	0.0904247	0.117703	0.00407805	0.392885	0.029493	0.00194088	714.391	344.57	344.59	717.329	49.7065	50.2281	716.617	126.391	126.599	587.498	77.3242	77.8615	100.411
Mudtank_1.26	2014	SE01B029	ok	0.00750989	864.377	21.5581	0.559964	8.42626	0.282449	0.0696166	0.00495356	1.13865	0.0895604	0.118677	0.00397804	0.426166	0.0352006	0.00225961	916.172	292.763	292.803	722.942	48.4661	49.0093	771.869	121.423	121.673	699.247	89.7727	90.4283	78.909
Mudtank_1.26	2014	SE01B005	ok	-0.00665697	868.405	22.4077	0.538049	8.47088	0.264679	0.0578492	0.00486002	0.941199	0.0843636	0.118051	0.00368861	0.348592	0.029769	0.00201571	523.102	368.547	368.557	719.339	44.9526	45.5319	673.509	120.739	120.931	592.915	80.2946	80.8218	137.514
Mudtank_1.26	2014	SE01B008	ok	-0.00276923	856.131	21.5861	0.541649	8.44467	0.309607	0.0611114	0.00548276	0.99736	0.0966636	0.118418	0.00434156	0.378283	0.0371996	0.00209268	642.222	385.764	385.779	721.451	52.9011	53.3972	702.469	136.166	136.351	738.238	83.0598	83.8487	112.337
Mudtank_1.26	2014	SE01B009	ok	-0.0021221	853.373	21.8333	0.548157	8.36125	0.291152	0.0618471	0.00572382	1.01944	0.100804	0.119599	0.00416464	0.352152	0.0313078	0.0018169	667.893	396.248	396.263	728.257	50.7181	51.2451	713.63	141.131	141.315	623.098	72.3209	72.9666	109.038
Mudtank_1.26	2014	SE01B015	ok	0.0117334	864.783	21.358	0.538742	8.21036	0.287637	0.0736431	0.00602252	1.23618	0.10998	0.121797	0.00426698	0.393776	0.0347336	0.00210432	1030.82	330.612	330.657	740.9	51.9125	52.4454	817.149	145.4	145.634	690.125	83.6219	84.3072	71.8747
Mudtank_1.26	2014	SE01B016	ok	0.00644726	885.754	22.1492	0.546035	8.19946	0.261195	0.0693159	0.00587038	1.16509	0.105421	0.121959	0.00388503	0.352056	0.0371587	0.00221565	907.26	348.937	348.97	741.831	47.2622	47.8484	784.346	141.94	142.161	737.443	87.9424	88.6863	81.7661
Mudtank_1.28	2015	AU31A016	ok	0.00600546	2152.4	15.471	0.521855	8.71037	0.193594	0.0677086	0.00282777	1.07132	0.0506838	0.114806	0.00255164	0.469793	0.0360137	0.00174028	858.743	173.388	173.448	700.597	31.1426	31.9309	739.388	69.9603	70.3586	715.116	69.1127	70.0009	81.584
Mudtank_1.28	2015	AU31A028	ok	-2.88619e-05	1970.72	14.0098	0.528455	8.72744	0.17866	0.0627098	0.00296836	0.990285	0.0510709	0.114581	0.0023456	0.396943	0.0379712	0.00191263	697.476	201.682	201.716	699.298	28.6308	29.4833	698.866	72.0836	72.4291	753.271	75.8851	76.7831	100.261
Mudtank_1.28	2015	AU31A010	ok	-0.00317968	2027.1	14.7201	0.529635	8.6992	0.195732	0.0601829	0.00270801	0.953468	0.0479674	0.114953	0.00258645	0.447243	0.0381867	0.00162898	609.216	194.541	194.568	701.45	31.5653	32.3452	679.907	68.4099	68.7544	757.465	64.6246	65.6884	115.14
Mudtank_1.28	2015	AU31A024	ok	0.00160377	2384.29	16.7776	0.519424	8.59749	0.188871	0.0643483	0.00268145	1.03152	0.0485917	0.116313	0.00255518	0.466346	0.0363565	0.00153816	752.18	175.974	176.019	709.307	31.1643	31.9716	719.687	67.8045	68.1937	721.803	61.0758	62.0978	94.3002
Mudtank_1.28	2015	AU31A019	ok	0.00546491	2053.73	14.9186	0.525906	8.54136	0.18803	0.0676561	0.00299068	1.09167	0.0539093	0.117077	0.00257734	0.445787	0.0380201	0.00190107	857.132	183.566	183.622	713.72	31.4237	32.2343	749.315	74.006	74.3927	754.223	75.4248	76.3305	83.2683
Mudtank_1.28	2015	AU31A027	ok	-0.00107633	2105.75	14.7888	0.529609	8.39304	0.170704	0.06263	0.0029629	1.02843	0.0529588	0.119146	0.00242328	0.394967	0.0329386	0.00154485	694.765	201.657	201.69	725.648	29.5175	30.4077	718.143	73.9611	74.3166	655.032	61.4433	62.2812	104.445
Mudtank_1.28	2015	AU31A007	ok	0.00352881	2046.33	14.6425	0.53768	8.36061	0.196068	0.0665014	0.00273967	1.09624	0.0519666	0.119609	0.00280498	0.494709	0.0351905	0.00187209	821.29	172.054	172.109	728.31	34.1597	34.9374	751.531	71.2517	71.6556	699.049	74.3769	75.1664	88.6788
NIST610_1.26	2014	SE01B043	ok		26315.4	464.009	0.988356	4.45661	0.0668695	0.909634	0.00606657	28.1303	0.461899	0.224386	0.00336681	0.913799	0.489365	0.00721476
NIST610_1.26	2014	SE01B023	ok		26557.8	456.758	0.995124	4.41371	0.0634615	0.90921	0.00607621	28.3905	0.450145	0.226567	0.00325764	0.906832	0.490005	0.00716193
NIST610_1.26	2014	SE01B001	ok		25957.2	463.734	0.988634	4.40865	0.0650943	0.908155	0.00593621	28.3901	0.458424	0.226827	0.00334913	0.914402	0.485816	0.00715104
NIST610_1.28	2015	AU31A001	ok		98886.9	462.789	0.983944	4.43944	0.054255	0.913394	0.00343351	28.3558	0.362563	0.225254	0.00275286	0.955807	0.50579	0.00817501
NIST610_1.28	2015	AU31A033	ok		100423	462.861	0.990679	4.37674	0.0533759	0.909251	0.00342835	28.6316	0.365481	0.228481	0.00278641	0.955379	0.504402	0.00812923
NIST610_1.28	2015	AU31A032	ok		101274	460.134	0.990465	4.36869	0.0529507	0.90888	0.00359509	28.6726	0.365565	0.228902	0.0027744	0.950656	0.507429	0.00823252
NIST610_1.28	2015	AU31A002	ok		101693	460.215	0.99768	4.34595	0.0532576	0.905276	0.00337509	28.7084	0.36773	0.2301	0.00281977	0.956704	0.507398	0.00815775
M257_1.28	2015	AU31A012	ok	-0.000163631	97693.3	861.743	0.282685	10.9667	0.113789	0.0587409	0.00045686	0.738202	0.0095724	0.0911847	0.000946116	0.80016	0.0278505	0.000518544	556.558	33.9255	34.053	562.54	11.6736	12.9743	561.356	14.5584	15.6255	555.225	20.6753	22.4043	101.075
M257_1.28	2015	AU31A023	ok	-0.000721979	97154	859.344	0.283064	10.928	0.113936	0.0583371	0.000473049	0.735726	0.00971763	0.0915079	0.00095407	0.789363	0.0285512	0.000526378	541.494	35.4612	35.5768	564.449	11.77	13.0694	559.908	14.7908	15.837	568.999	20.9804	22.7685	104.239
M257_1.28	2015	AU31A025	ok	0.000260667	98678	850.971	0.280877	10.8863	0.110973	0.0591947	0.000427149	0.749405	0.00935961	0.0918589	0.000936395	0.816199	0.0285531	0.000537013	573.318	31.387	31.5333	566.521	11.5501	12.8809	567.879	14.1849	15.3027	569.036	21.4043	23.1599	98.8144
M257_1.28	2015	AU31A008	ok	-0.00116811	98473.4	860.634	0.282268	10.8839	0.111313	0.0580324	0.00041898	0.734849	0.00919951	0.0918788	0.000939675	0.81695	0.0281195	0.000511065	530.032	31.6345	31.7586	566.639	11.5904	12.9176	559.395	14.006	15.1047	560.513	20.3744	22.1591	106.907
M257_1.28	2015	AU31A018	ok	4.79763e-05	99276.4	859.516	0.281016	10.8398	0.110328	0.0590843	0.000448774	0.751215	0.00954026	0.0922529	0.000938954	0.801435	0.0282189	0.000502444	569.256	33.0603	33.1972	568.847	11.5795	12.9177	568.929	14.4505	15.5532	562.467	20.0297	21.8547	99.9283
Plesovice_1.26	2014	SE01B039	ok	0.00269533	17704.3	971.998	0.155685	18.833	0.228393	0.0552778	0.000958268	0.404524	0.00855825	0.0530984	0.000643941	0.573224	0.0157224	0.000426017	422.504	77.3791	77.4113	333.516	8.08931	8.75816	344.924	14.5947	15.0055	315.312	17.0875	17.7765	78.938
Plesovice_1.26	2014	SE01B034	ok	0.00154838	10999.7	598.5	0.092435	18.7233	0.261869	0.0543994	0.00119855	0.400429	0.0104499	0.0534095	0.000747	0.535938	0.0168617	0.000689965	386.645	98.9636	98.9847	335.42	9.38256	9.97146	341.959	17.8481	18.1798	337.97	27.6589	28.1534	86.7514
Plesovice_1.26	2014	SE01B020	ok	0.00310996	15853.8	901.692	0.130598	18.626	0.258087	0.0556967	0.00109009	0.412119	0.00988274	0.0536885	0.000743926	0.577822	0.0174085	0.000477284	439.329	87.1056	87.1367	337.127	9.3427	9.93981	350.4	16.8054	17.1747	348.836	19.1279	19.8816	76.7369
Plesovice_1.26	2014	SE01B026	ok	0.0010122	10596	572.197	0.093141	18.6477	0.271114	0.053999	0.00147722	0.399092	0.0123638	0.0536259	0.000779654	0.469297	0.0157086	0.000675179	370.027	123.238	123.253	336.744	9.79169	10.3617	340.989	21.1276	21.407	315.037	27.0816	27.5208	91.0053
Plesovice_1.26	2014	SE01B031	ok	-0.00403164	11883	643.331	0.0964275	18.6458	0.244844	0.0499396	0.00114008	0.369127	0.00972143	0.0536314	0.00070425	0.498602	0.0160663	0.000667158	191.171	106.201	106.206	336.778	8.84466	9.47195	319.006	16.8029	17.1096	322.155	26.7552	27.2197	176.166
Plesovice_1.26	2014	SE01B004	ok	-0.00182876	7697.7	426.68	0.0943673	18.6331	0.264533	0.0517181	0.00137525	0.382535	0.0115311	0.053668	0.000761923	0.470973	0.0167061	0.00075828	271.97	121.902	121.911	337.002	9.56881	10.1522	328.901	19.8287	20.1056	334.878	30.3998	30.8423	123.912
Plesovice_1.26	2014	SE01B007	ok	-0.00107243	6076.88	332.169	0.0788975	18.5473	0.307965	0.0523625	0.00166894	0.389092	0.0139834	0.0539162	0.000895242	0.462019	0.0164401	0.00094037	300.281	145.374	145.382	338.52	11.2418	11.7468	333.706	23.9859	24.222	329.588	37.7048	38.0513	112.734
Plesovice_1.26	2014	SE01B036	ok	-0.000344897	13080.8	700.287	0.111487	18.5391	0.253715	0.0529517	0.00115861	0.393643	0.0101591	0.05394	0.000738189	0.530278	0.0166547	0.000572116	325.738	99.346	99.3609	338.666	9.26953	9.87641	337.027	17.396	17.7265	333.856	22.937	23.5167	103.969
Plesovice_1.26	2014	SE01B014	ok	0.000967277	12616.4	668.337	0.104034	18.4145	0.247622	0.0540607	0.001211	0.404608	0.0105712	0.0543052	0.00073025	0.514684	0.0172492	0.000608522	372.598	100.867	100.886	340.899	9.16824	9.78925	344.985	18.0268	18.3611	345.672	24.3894	24.9743	91.4925
Plesovice_1.26	2014	SE01B028	ok	0.00173146	12204.7	639.193	0.0949818	18.3395	0.247787	0.054708	0.00113674	0.411128	0.0101898	0.0545272	0.000736724	0.545135	0.0165394	0.000626023	399.335	93.123	93.147	342.257	9.24854	9.86926	349.687	17.3339	17.6907	331.563	25.0997	25.6233	85.7066
Plesovice_1.26	2014	SE01B010	ok	-0.00145472	17590.6	942.242	0.141358	18.3508	0.240839	0.0521376	0.000949573	0.39157	0.00879029	0.0544936	0.000715184	0.584626	0.0161208	0.00044272	290.455	83.2159	83.23	342.051	8.97828	9.61572	335.515	15.0639	15.4411	323.239	17.754	18.4513	117.764
Plesovice_1.26	2014	SE01B017	ok	-0.00195384	11607.8	634.834	0.0881211	18.2458	0.251527	0.0517807	0.00122336	0.391126	0.0106987	0.0548071	0.000755541	0.503974	0.0160209	0.000640604	274.739	108.253	108.263	343.967	9.48349	10.0957	335.192	18.3373	18.6478	321.252	25.6908	26.1716	125.198
Plesovice_1.28	2015	AU31A022	ok	0.0015059	36073	541.908	0.0897498	18.6494	0.204283	0.0543957	0.000606337	0.401988	0.00628231	0.0536211	0.000587359	0.700908	0.0165132	0.000465126	386.491	50.0696	50.1113	336.715	7.37667	8.11793	343.089	10.7237	11.2707	331.043	18.6489	19.3458	87.121
Plesovice_1.28	2015	AU31A015	ok	0.000750544	40198	597.636	0.090951	18.6301	0.203882	0.0537956	0.000539953	0.397964	0.00590957	0.0536765	0.00058742	0.736974	0.0167978	0.000503052	361.523	45.2839	45.3243	337.054	7.37724	8.11988	340.17	10.1027	10.672	336.7	20.1667	20.8348	93.2317
Plesovice_1.28	2015	AU31A006	ok	0.000889126	33235.7	511.208	0.0897286	18.5716	0.206996	0.0539316	0.000653052	0.400227	0.00658681	0.0538457	0.000600157	0.677243	0.0174046	0.000567884	367.212	54.5762	54.6108	338.089	7.53659	8.2692	341.813	11.2509	11.7696	348.759	22.7589	23.3957	92.0692
Plesovice_1.28	2015	AU31A017	ok	-9.41455e-05	43418.2	655.962	0.0919629	18.5858	0.203386	0.0531341	0.000587666	0.394007	0.00613028	0.0538045	0.000588788	0.703338	0.0174071	0.000476901	333.539	50.1471	50.1782	337.837	7.39396	8.13836	337.292	10.4957	11.0358	348.809	19.1126	19.8667	101.288
Plesovice_1.28	2015	AU31A011	ok	0.000411191	32948.1	493.992	0.0896553	18.5548	0.204324	0.0535538	0.000674405	0.397782	0.00665435	0.0538943	0.000593478	0.658267	0.0169879	0.00053107	351.349	56.9177	56.948	338.386	7.45255	8.19393	340.039	11.3767	11.8848	340.48	21.2879	21.9359	96.3106
Plesovice_1.28	2015	AU31A026	ok	-0.000218473	43241.7	632.765	0.0907942	18.5067	0.198246	0.053067	0.000560744	0.395191	0.00594634	0.0540344	0.000578823	0.711922	0.0170151	0.000476775	330.676	47.9346	47.9665	339.243	7.26802	8.03013	338.154	10.1763	10.7352	341.019	19.1112	19.8328	102.591
Plesovice_1.28	2015	AU31A009	ok	0.00137457	40234.3	603.389	0.0894104	18.4201	0.205954	0.0543862	0.000588161	0.40692	0.00632976	0.0542886	0.000606996	0.718786	0.0176692	0.000492345	386.099	48.5805	48.6234	340.797	7.62086	8.35723	346.655	10.7846	11.3398	354.015	19.729	20.482	88.2669
2.0 J/cm2
91500_2.0	2014	SE01A020	ok	0.000156231	7227.75	80.6511	0.353828	5.63366	0.0907896	0.074564	0.00184758	1.82411	0.0539173	0.177505	0.00286059	0.545216	0.0520128	0.00146176	1055.9	99.7941	99.9504	1053.33	33.95	35.5668	1054.16	62.3183	63.223	1024.87	57.6054	59.7676	99.7568
91500_2.0	2014	SE01A064	ok	0.00132305	7347.59	78.3616	0.35076	5.62361	0.119777	0.075607	0.00199343	1.85293	0.0628031	0.177822	0.00378742	0.628401	0.0548194	0.00192078	1083.81	105.744	105.899	1055.06	44.9436	46.1811	1064.47	72.1584	72.9565	1078.72	75.593	77.4303	97.3477
91500_2.0	2014	SE01A093	ok	0.00122917	7389.57	82.4911	0.356737	5.61609	0.0931664	0.0755765	0.0018281	1.85466	0.0543987	0.17806	0.00295387	0.56559	0.0503991	0.00141343	1083	97.0242	97.1933	1056.37	35.0485	36.6258	1065.09	62.4798	63.4009	993.839	55.7439	57.8449	97.5407
91500_2.0	2014	SE01A046	ok	-0.00126201	7357.33	80.8911	0.352241	5.60001	0.0898041	0.07359	0.00169448	1.8111	0.0508193	0.178571	0.00286364	0.571506	0.0540548	0.00153769	1029.37	93.1074	93.2666	1059.16	33.9703	35.6038	1049.48	58.8963	59.8444	1064.06	60.5383	62.7571	102.895
91500_2.0	2014	SE01A003	ok	0.00152305	7158.45	79.4161	0.350971	5.57113	0.0897041	0.0761152	0.00206748	1.88296	0.0594569	0.179497	0.00289018	0.509926	0.053471	0.00141979	1097.23	108.722	108.877	1064.22	34.2714	35.9064	1075.1	67.8957	68.7602	1052.86	55.9123	58.2582	96.9917
91500_2.0	2014	SE01A116	ok	0.000901037	7431.54	81.8982	0.3534	5.5691	0.0866554	0.0756065	0.00174333	1.87106	0.052047	0.179562	0.002794	0.559374	0.0549699	0.00160532	1083.8	92.4772	92.6548	1064.58	33.1299	34.8196	1070.9	59.5785	60.5542	1081.6	63.1733	65.3722	98.227
91500_2.0	2014	SE01A004	ok	-0.00029548	7442.9	81.6585	0.349879	5.54336	0.0916918	0.074772	0.00175843	1.859	0.0534493	0.180396	0.00298391	0.5753	0.0551407	0.00164391	1061.5	94.6348	94.8013	1069.14	35.3689	36.9697	1066.63	61.3349	62.2756	1084.87	64.6866	66.8485	100.719
91500_2.0	2014	SE01A115	ok	-5.81202e-05	7840.7	81.9695	0.355205	5.5193	0.0931124	0.0751317	0.00208219	1.87608	0.060869	0.181182	0.00305661	0.519971	0.0575645	0.00181712	1071.15	111.361	111.505	1073.43	36.2183	37.7954	1072.68	69.6057	70.4455	1131.25	71.4198	73.5527	100.213
91500_2.0	2014	SE01A047	ok	-0.000482761	7287.69	81.0434	0.348524	5.50855	0.094233	0.0748474	0.00186984	1.87263	0.056699	0.181536	0.00310548	0.564993	0.0540976	0.00160093	1063.53	100.499	100.656	1075.36	36.7917	38.3508	1071.46	64.8828	65.7808	1064.88	63.027	65.1643	101.112
91500_2.0	2014	SE01A021	ok	-7.82042e-05	7297.88	80.3621	0.348113	5.49805	0.0868513	0.075258	0.00176213	1.8865	0.0532839	0.181883	0.00287315	0.559278	0.0559005	0.00151992	1074.53	94.0375	94.2092	1077.25	34.0341	35.7195	1076.35	60.8028	61.7689	1099.42	59.786	62.1805	100.254
91500_1.99	2015	AU31A038	ok	0.00157537	30754.2	97.4663	0.35801	5.62971	0.0697829	0.0757796	0.000795861	1.85515	0.0301395	0.177629	0.0022018	0.762966	0.0517066	0.000999871	1088.38	42.0924	42.4845	1054.01	26.1299	28.2013	1065.26	34.6134	36.2502	1018.98	39.4089	42.4728	96.842
91500_1.99	2015	AU31A053	ok	0.000618624	30437.6	94.8492	0.352345	5.61043	0.0707118	0.0751007	0.000784657	1.84484	0.0302022	0.178239	0.00224646	0.76987	0.0538671	0.00100919	1070.32	41.9881	42.3683	1057.35	26.6529	28.699	1061.59	34.7589	36.3781	1060.46	39.735	43.0184	98.7878
91500_1.99	2015	AU31A054	ok	0.00090812	30431.4	95.3636	0.354635	5.59441	0.0688046	0.0754473	0.000709299	1.85867	0.028773	0.17875	0.00219841	0.794474	0.051374	0.000964073	1079.57	37.7291	38.159	1060.14	26.077	28.1756	1066.51	33.0202	34.7361	1012.59	38.0041	41.1345	98.2006
91500_1.99	2015	AU31A063	ok	0.000803113	30778.9	93.5232	0.355901	5.59219	0.070553	0.0753735	0.000935602	1.85759	0.0328773	0.178821	0.00225607	0.712832	0.0549316	0.00103435	1077.61	49.8298	50.155	1060.53	26.76	28.8104	1066.13	37.7387	39.2477	1080.87	40.7051	44.0361	98.4153
91500_1.99	2015	AU31A036	ok	0.000147169	30122.6	94.264	0.355385	5.58587	0.0696542	0.0748642	0.000848105	1.84712	0.031119	0.179023	0.00223237	0.740163	0.053845	0.00113247	1063.98	45.5699	45.9164	1061.64	26.4766	28.5515	1062.4	35.7973	37.3739	1060.04	44.5896	47.5366	99.7794
91500_1.99	2015	AU31A062	ok	0.000639593	28775.6	93.6512	0.355709	5.57534	0.0719035	0.0753462	0.000879842	1.86252	0.0324039	0.179361	0.00231316	0.741281	0.054013	0.00127281	1076.88	46.8822	47.2272	1063.48	27.4308	29.4453	1067.88	37.1577	38.6943	1063.26	50.1113	52.7664	98.7563
91500_1.99	2015	AU31A046	ok	0.00154442	29440.2	90.1356	0.353243	5.5846	0.071735	0.076045	0.000865936	1.87668	0.0322148	0.179064	0.0023001	0.748298	0.0548793	0.00101776	1095.38	45.5912	45.9581	1061.86	27.2794	29.2983	1072.89	36.8341	38.398	1079.87	40.0533	43.4282	96.9393
91500_1.99	2015	AU31A064	ok	0.00040771	30237.8	93.889	0.355488	5.55552	0.0707485	0.0752818	0.000887301	1.86757	0.0324063	0.180001	0.00229228	0.733907	0.0533409	0.00104848	1075.16	47.3322	47.6729	1066.98	27.1756	29.2206	1069.67	37.122	38.6651	1050.37	41.2925	44.4031	99.2391
91500_1.99	2015	AU31A045	ok	5.77069e-05	30403	93.4963	0.356087	5.5745	0.0676493	0.0748633	0.000853085	1.85087	0.0308114	0.179388	0.00217697	0.728991	0.0550306	0.00106929	1063.96	45.8382	46.1827	1063.63	25.8154	27.9472	1063.74	35.4161	37.0129	1082.76	42.0782	45.3193	99.9692
91500_1.99	2015	AU31A037	ok	-0.000277979	29138.5	92.0157	0.35332	5.60138	0.0684014	0.0744069	0.000832147	1.83076	0.0303153	0.178528	0.00218009	0.73746	0.0543872	0.00102104	1051.65	45.0708	45.413	1058.93	25.8622	27.9723	1056.55	34.9906	36.5847	1070.43	40.1917	43.4997	100.692
Mudtank_2.0	2014	SE01A078	ok	0.00651381	1182.32	20.8715	0.506533	8.80166	0.254934	0.0679217	0.00465632	1.06355	0.0791511	0.113615	0.00329077	0.38919	0.0359295	0.00191921	865.263	284.32	284.357	693.708	40.1854	40.7875	735.57	109.485	109.737	713.474	76.2218	77.0244	80.173
Mudtank_2.0	2014	SE01A080	ok	0.0120199	1200.82	21.3242	0.505689	8.73721	0.269454	0.0725916	0.00501424	1.14505	0.0866195	0.114453	0.00352971	0.407682	0.0334433	0.0017176	1001.69	280.487	280.537	698.558	43.0867	43.6566	774.904	117.238	117.499	664.906	68.2972	69.0748	69.738
Mudtank_2.0	2014	SE01A087	ok	0.00723486	1269.58	21.9995	0.515779	8.71405	0.26476	0.0687109	0.00428361	1.08672	0.0753664	0.114757	0.00348668	0.438099	0.0363942	0.00186634	889.173	257.589	257.632	700.317	42.5556	43.1354	746.909	103.6	103.874	722.538	74.1054	74.9516	78.7605
Mudtank_2.0	2014	SE01A094	ok	-0.00365161	1269.66	22.467	0.519972	8.73368	0.2718	0.059718	0.0039843	0.942368	0.0693769	0.114499	0.00356332	0.422725	0.0324215	0.00151622	592.43	289.269	289.286	698.825	43.4962	44.0612	674.121	99.2572	99.4909	644.913	60.3199	61.1472	117.959
Mudtank_2.0	2014	SE01A102	ok	-0.00137866	1301.37	22.7259	0.513759	8.71241	0.237344	0.0616339	0.00419946	0.974975	0.0715434	0.114779	0.00312681	0.371248	0.0404033	0.0018715	660.495	292.082	292.102	700.442	38.163	38.8087	691.025	101.414	101.655	800.575	74.1659	75.2026	106.048
Mudtank_2.0	2014	SE01A089	ok	0.00083559	1316.21	22.8198	0.51519	8.69919	0.227125	0.0634838	0.00399538	1.00576	0.068529	0.114953	0.00300128	0.383184	0.0350402	0.00171638	723.556	267.012	267.039	701.45	36.6279	37.3021	706.732	96.3081	96.5727	696.114	68.1959	69.049	96.9448
Mudtank_2.0	2014	SE01A072	ok	0.000735317	1253.99	22.5442	0.514202	8.69591	0.274269	0.0634088	0.00433658	1.00496	0.0756864	0.114997	0.003627	0.418785	0.0354771	0.00174633	721.047	290.276	290.301	701.701	44.2633	44.8233	706.322	106.391	106.63	704.645	69.371	70.2303	97.3169
Mudtank_2.0	2014	SE01A095	ok	0.00775156	1296.72	22.4423	0.518911	8.60741	0.238721	0.0693814	0.00443329	1.11092	0.0773832	0.116179	0.00322215	0.398157	0.0337677	0.00150427	909.205	263.188	263.232	708.533	39.3014	39.9432	758.617	105.686	105.964	671.249	59.8051	60.7084	77.9288
Mudtank_2.0	2014	SE01A085	ok	-0.00285446	1256.92	21.6101	0.508193	8.63649	0.225219	0.0605921	0.00402911	0.966921	0.0690636	0.115788	0.00301947	0.365098	0.0308757	0.00145057	623.847	286.792	286.811	706.274	36.8359	37.5156	686.876	98.122	98.3674	614.625	57.7514	58.5363	113.213
Mudtank_2.0	2014	SE01A081	ok	0.0101373	1289.92	22.7643	0.509118	8.54373	0.240674	0.0714943	0.00437178	1.15328	0.0776451	0.117045	0.00329711	0.418411	0.0370534	0.00166654	970.692	249.482	249.535	713.532	40.1999	40.8363	778.793	104.865	105.16	735.391	66.1508	67.1312	73.5075
Mudtank_2.0	2014	SE01A110	ok	-0.00016023	1393.86	24.7647	0.516576	8.62316	0.248038	0.0628382	0.00466499	1.00431	0.0799593	0.115967	0.00333569	0.361288	0.0363627	0.00183175	701.834	316.084	316.106	707.307	40.6903	41.3083	705.998	112.417	112.644	721.924	72.7332	73.5937	100.78
Mudtank_2.0	2014	SE01A090	ok	0.000560022	1331.22	23.016	0.51627	8.59883	0.232109	0.0634867	0.00418509	1.01755	0.0724834	0.116295	0.00313916	0.378939	0.0386901	0.00175523	723.653	279.673	279.699	709.203	38.2871	38.9468	712.681	101.533	101.789	767.265	69.6159	70.6301	98.0032
Mudtank_2.0	2014	SE01A070	ok	0.0103769	1230.86	21.3692	0.513595	8.49603	0.249736	0.0718061	0.005217	1.16482	0.0912924	0.117702	0.00345979	0.375049	0.0339649	0.00164079	979.563	296.019	296.065	717.323	42.1707	42.7842	784.216	122.926	123.181	675.106	65.2266	66.0653	73.2289
Mudtank_2.0	2014	SE01A107	ok	0.00497726	1264.33	21.9488	0.51833	8.50753	0.256213	0.0673354	0.00490106	1.09082	0.085924	0.117543	0.00353992	0.382327	0.0373642	0.00177532	847.261	302.729	302.762	716.406	43.1506	43.7489	748.902	117.982	118.225	741.447	70.4581	71.3945	84.5555
Mudtank_2.0	2014	SE01A104	ok	0.00366907	1321.13	22.9412	0.524636	8.50526	0.236623	0.0662645	0.00407558	1.07376	0.0724831	0.117574	0.00327101	0.412133	0.0337277	0.00163019	813.831	257.171	257.207	716.587	39.872	40.5191	740.581	99.9848	100.265	670.468	64.8125	65.6451	88.051
Mudtank_2.0	2014	SE01A098	ok	-0.000429359	1288.26	22.117	0.529646	8.51812	0.241888	0.0628618	0.00506252	1.01708	0.0868525	0.117397	0.00333369	0.332539	0.0359938	0.00203932	702.631	342.846	342.867	715.563	40.6394	41.2727	712.444	121.677	121.89	714.727	80.9893	81.7477	101.84
Mudtank_2.0	2014	SE01A082	ok	0.00850372	1209.96	20.8364	0.517386	8.41424	0.227055	0.0704643	0.00421616	1.15416	0.0757562	0.118846	0.00320701	0.411115	0.0369281	0.00178719	941.022	245.237	245.287	723.919	39.0693	39.7429	779.207	102.29	102.593	732.947	70.9443	71.8533	76.9291
Mudtank_2.0	2014	SE01A113	ok	-0.0031061	1355.18	23.4821	0.517687	8.47755	0.243863	0.0607555	0.00413883	0.987706	0.0730379	0.117959	0.00339317	0.389004	0.0374852	0.00169816	629.652	293.525	293.544	718.803	41.3538	41.9819	697.549	103.163	103.404	743.804	67.3919	68.3765	114.159
Mudtank_2.0	2014	SE01A108	ok	0.00847009	1295.2	22.8319	0.517123	8.40228	0.259391	0.0704662	0.00435355	1.15584	0.0798286	0.119015	0.00367418	0.446987	0.0379397	0.00182529	941.076	253.219	253.268	724.894	44.7571	45.3479	779.995	107.742	108.03	752.656	72.421	73.3598	77.0282
Mudtank_2.0	2014	SE01A114	ok	-0.00652818	1409.73	24.1361	0.523095	8.43911	0.232207	0.0580309	0.00374953	0.947709	0.0665552	0.118496	0.00326048	0.391806	0.0337384	0.00156072	529.976	283.113	283.127	721.901	39.727	40.386	676.909	95.0752	95.3212	670.677	62.0503	62.92	136.214
Mudtank_2.0	2014	SE01A074	ok	0.000481422	1299.06	22.5638	0.5078	8.41603	0.254883	0.0638563	0.00376378	1.0457	0.0692955	0.118821	0.00359854	0.457022	0.0386415	0.00207825	735.953	249.562	249.593	723.774	43.8396	44.4407	726.752	96.3192	96.599	766.319	82.4295	83.2857	98.3451
Mudtank_2.0	2014	SE01A100	ok	0.00372877	1313.87	22.4049	0.504882	8.34528	0.230368	0.0667043	0.00474634	1.1016	0.0840766	0.119828	0.00330782	0.361686	0.0373247	0.0021273	827.646	296.868	296.901	729.575	40.2793	40.9432	754.125	115.113	115.365	740.677	84.4288	85.2102	88.1506
Mudtank_2.0	2014	SE01A084	ok	0.00519587	1273.72	21.6556	0.507461	8.32235	0.263697	0.0679699	0.00484087	1.1256	0.0877415	0.120158	0.00380726	0.406477	0.0359711	0.00169331	866.733	295.311	295.347	731.475	46.3541	46.9351	765.652	119.367	119.618	714.285	67.2487	68.1591	84.3945
Mudtank_2.0	2014	SE01A068	ok	0.00257017	1345.75	22.3136	0.523723	8.26886	0.222333	0.0659427	0.00441784	1.09909	0.0793427	0.120936	0.00325171	0.372464	0.0357588	0.00187343	803.647	280.584	280.617	735.947	39.5761	40.2634	752.911	108.704	108.97	710.143	74.4097	75.224	91.5759
Mudtank_2.0	2014	SE01A097	ok	0.00306542	1330.54	22.8109	0.513568	8.25875	0.226862	0.0663765	0.00429652	1.10767	0.0778883	0.121084	0.00332609	0.39065	0.0371234	0.00191263	817.361	270.503	270.538	736.798	40.4787	41.1524	757.054	106.468	106.742	736.755	75.9164	76.7753	90.1435
Mudtank_2.0	2014	SE01A086	ok	0.0066912	1298.35	21.782	0.522618	8.22477	0.248693	0.069451	0.00428032	1.16377	0.0798912	0.121584	0.00367635	0.440462	0.0364357	0.00182148	911.27	253.77	253.816	739.674	44.7312	45.3465	783.726	107.603	107.895	723.348	72.3225	73.1913	81.1696
Mudtank_2.0	2014	SE01A105	ok	0.00250459	1299.69	22.517	0.509662	8.25559	0.233913	0.0659225	0.00448772	1.10052	0.0811487	0.12113	0.00343208	0.384257	0.0377883	0.00177861	803.006	285.139	285.171	737.064	41.7678	42.4215	753.602	111.136	111.397	749.708	70.574	71.5296	91.7882
Mudtank_2.0	2014	SE01A079	ok	-0.00573617	1237.28	20.1493	0.510769	8.25953	0.279419	0.059124	0.00500591	0.986553	0.0899504	0.121072	0.00409586	0.371038	0.0340487	0.00192356	570.718	368.437	368.449	736.732	49.8472	50.3957	696.96	127.093	127.288	676.743	76.4642	77.1844	129.089
Mudtank_2.0	2014	SE01A111	ok	-0.00456061	1451.21	24.0421	0.512963	8.23763	0.225356	0.0601479	0.0036589	1.00631	0.0671207	0.121394	0.00332097	0.410148	0.0367472	0.00176175	607.957	263.061	263.08	738.583	40.4107	41.0887	707.006	94.3147	94.5852	729.42	69.9406	70.8537	121.486
Mudtank_2.0	2014	SE01A101	ok	0.0028927	1313.32	21.9762	0.511653	8.21108	0.237377	0.0663568	0.00465718	1.11378	0.0845409	0.121787	0.00352077	0.380863	0.0402435	0.001787	816.741	293.326	293.358	740.839	42.8343	43.4785	759.989	115.374	115.629	797.469	70.8229	71.8995	90.7067
Mudtank_1.99	2015	AU31A039	ok	-0.00146958	3313.98	16.5963	0.525336	8.78283	0.172037	0.0614028	0.00260643	0.963532	0.0450447	0.113858	0.00223024	0.418995	0.031728	0.00134873	652.44	182.208	182.241	695.118	27.2317	28.1161	685.124	64.0585	64.4319	631.331	53.6744	54.5642	106.541
Mudtank_1.99	2015	AU31A043	ok	-0.0028937	3372.88	16.6153	0.527373	8.6354	0.164452	0.0605623	0.00223097	0.966568	0.0400826	0.115802	0.00220533	0.459233	0.035974	0.00127167	622.787	158.906	158.94	706.358	26.9037	27.8272	686.693	56.953	57.3745	714.342	50.5035	51.7098	113.419
Mudtank_1.99	2015	AU31A047	ok	-1.41033e-05	3517.9	17.3806	0.508776	8.5862	0.167245	0.0630438	0.00206091	1.01194	0.0385075	0.116466	0.00226857	0.511872	0.0342187	0.00122462	708.784	139.027	139.077	710.19	27.6667	28.5752	709.852	54.0244	54.4989	680.067	48.6765	49.8111	100.198
Mudtank_1.99	2015	AU31A057	ok	0.00189533	3386.13	16.7756	0.5192	8.4989	0.162991	0.0648202	0.00233618	1.05114	0.0429135	0.117662	0.00225652	0.46975	0.0348471	0.00130642	767.589	151.821	151.875	717.095	27.5048	28.436	729.446	59.5604	60.0152	692.343	51.9121	53.0159	93.4217
Mudtank_1.99	2015	AU31A041	ok	0.000453271	3344.22	16.4375	0.521871	8.48818	0.175514	0.0636591	0.00215705	1.03361	0.0410295	0.117811	0.00243603	0.520906	0.0348988	0.00133364	729.403	143.622	143.674	717.951	29.6908	30.5575	720.734	57.2193	57.6814	693.354	52.9924	54.0772	98.43
Mudtank_1.99	2015	AU31A049	ok	0.00235012	3463.23	16.6547	0.514275	8.47006	0.16674	0.0652635	0.00219788	1.06193	0.0414245	0.118063	0.00232416	0.504652	0.03359	0.00140656	781.929	141.536	141.596	719.405	28.3241	29.235	734.775	57.3251	57.8044	667.775	55.9255	56.8806	92.0039
Mudtank_1.99	2015	AU31A052	ok	-0.00209547	3195.77	15.3922	0.530073	8.43837	0.159164	0.0616811	0.00242488	1.00741	0.043927	0.118506	0.00223526	0.432575	0.0340879	0.00130244	662.138	168.481	168.518	721.96	27.2352	28.1879	707.564	61.7052	62.1185	677.509	51.7729	52.8331	109.035
M257_1.99	2015	AU31A042	ok	0.00057215	143358	872.583	0.27639	10.887	0.12704	0.0594479	0.000425274	0.752562	0.0103005	0.091853	0.00107183	0.852544	0.0280642	0.000438224	582.592	31.0675	31.2201	566.487	13.2207	14.3978	569.71	15.5955	16.6251	559.425	17.4709	19.5153	97.2356
M257_1.99	2015	AU31A051	ok	-6.14719e-05	142791	869.489	0.275823	10.7943	0.124335	0.0590572	0.000364427	0.754034	0.0098532	0.0926415	0.0010671	0.881477	0.0285016	0.000397549	568.259	26.8634	27.0312	571.14	13.1574	14.3584	570.562	14.9114	15.9883	568.023	15.8459	18.1397	100.507
M257_1.99	2015	AU31A056	ok	0.000204846	143155	881.824	0.278839	10.7797	0.123907	0.0592947	0.000349814	0.758095	0.00979465	0.0927674	0.00106632	0.889662	0.0280448	0.000397007	576.988	25.6452	25.8263	571.883	13.147	14.3519	572.91	14.8041	15.8968	559.045	15.8279	18.0564	99.1152
M257_1.99	2015	AU31A059	ok	-0.000804121	143263	867.467	0.277989	10.7708	0.124859	0.0584837	0.000325026	0.748341	0.00962047	0.0928438	0.00107628	0.901729	0.0283553	0.000397955	546.978	24.2813	24.4532	572.334	13.2694	14.4659	567.261	14.5851	15.6721	565.149	15.8632	18.1332	104.636
M257_1.99	2015	AU31A048	ok	-0.000201558	157116	872.686	0.273616	10.785	0.147027	0.0589557	0.000659717	0.753383	0.0132874	0.092721	0.00126401	0.772949	0.0272485	0.000534676	564.511	48.7451	48.8366	571.609	15.5849	16.6129	570.185	20.1126	20.9224	543.383	21.3248	22.9366	101.257
NIST610_2.0	2014	SE01A049	ok		55347	464.089	0.996134	4.65009	0.0730862	0.914696	0.00391178	27.1099	0.441581	0.215049	0.00337996	0.964918	0.458236	0.00691815
NIST610_2.0	2014	SE01A120	ok		43384.3	459.416	0.991718	4.48302	0.0721045	0.914737	0.00444833	28.1214	0.472524	0.223064	0.00358773	0.957205	0.484995	0.00711697
NIST610_2.0	2014	SE01A066	ok		55644	465.382	0.996515	4.61047	0.0696003	0.909883	0.00387949	27.199	0.426662	0.216898	0.00327432	0.962352	0.461866	0.00687948
NIST610_2.0	2014	SE01A024	ok		55409.8	463.464	0.989093	4.61662	0.0697349	0.908377	0.00387785	27.1178	0.425665	0.216609	0.00327192	0.962307	0.461619	0.00683492
NIST610_2.0	2014	SE01A006	ok		55054.9	467.576	0.984637	4.62732	0.070572	0.907341	0.00383726	27.0243	0.427704	0.216108	0.0032959	0.963637	0.458862	0.00675669
NIST610_2.0	2014	SE01A065	ok		54938	459.102	0.992379	4.6326	0.0703868	0.906919	0.00377149	26.9809	0.42502	0.215862	0.00327976	0.964525	0.465094	0.00703174
NIST610_2.0	2014	SE01A077	ok		56430.2	459.158	0.999458	4.60449	0.0712177	0.907651	0.00355259	27.1675	0.433447	0.217179	0.00335912	0.969441	0.461541	0.0068014
NIST610_2.0	2014	SE01A092	ok		42931.3	459.82	0.979396	4.51883	0.0706155	0.908492	0.00443128	27.7082	0.453596	0.221296	0.00345819	0.954581	0.482153	0.00708625
NIST610_2.0	2014	SE01A005	ok		55374.8	452.856	0.990774	4.5865	0.0701026	0.906353	0.00383847	27.2351	0.43196	0.218031	0.00333251	0.963691	0.459325	0.0068956
NIST610_2.0	2014	SE01A119	ok		44246.4	464.135	0.986763	4.45232	0.0695911	0.900469	0.00413412	27.8737	0.454081	0.224602	0.0035106	0.959467	0.484249	0.00706746
NIST610_1.99	2015	AU31A035	ok		151897	459.367	0.991419	4.49068	0.0637108	0.910631	0.00298065	27.9474	0.406915	0.222683	0.00315928	0.974404	0.484049	0.0062524
NIST610_1.99	2015	AU31A065	ok		153016	465.081	0.992775	4.47317	0.062682	0.910019	0.00297661	28.038	0.403455	0.223555	0.00313265	0.973822	0.490751	0.00632915
NIST610_1.99	2015	AU31A066	ok		153175	458.097	0.988604	4.49157	0.0657283	0.907659	0.00292153	27.8507	0.417302	0.222639	0.00325804	0.976654	0.488349	0.0062404
NIST610_1.99	2015	AU31A034	ok		155583	463.329	0.989796	4.4558	0.0619354	0.908151	0.00280881	28.0896	0.399993	0.224427	0.00311952	0.976127	0.486004	0.00621749
Plesovice_2.0	2014	SE01A071	ok	0.00308182	9014.74	338.718	0.0900547	18.7647	0.261331	0.0556167	0.00149725	0.408484	0.0123811	0.0532915	0.000742175	0.459478	0.0164205	0.000728637	436.13	119.88	119.902	334.698	9.32248	9.91247	347.783	21.0825	21.3737	329.199	29.2155	29.6603	76.7427
Plesovice_2.0	2014	SE01A075	ok	0.0003832	10723	394.96	0.0833996	18.7271	0.285693	0.05346	0.00131958	0.393433	0.0114164	0.0533986	0.000814626	0.52574	0.0173602	0.000722353	347.386	111.642	111.657	335.353	10.232	10.7744	336.874	19.5504	19.8448	347.878	28.9501	29.4508	96.5361
Plesovice_2.0	2014	SE01A067	ok	0.000701821	9563.75	357.006	0.0881613	18.6783	0.268441	0.0537365	0.0014834	0.3965	0.0123399	0.0535379	0.000769435	0.461786	0.0156906	0.000675417	359.041	124.599	124.614	336.206	9.66375	10.2391	339.107	21.1075	21.3841	314.68	27.0914	27.5294	93.6401
Plesovice_2.0	2014	SE01A069	ok	0.00304285	9236.7	338.333	0.0899692	18.5704	0.276575	0.0556659	0.00149611	0.413124	0.0126942	0.0538492	0.000801994	0.484694	0.0169373	0.000678297	438.098	119.642	119.664	338.11	10.0712	10.6306	351.122	21.5781	21.8681	339.475	27.1902	27.6975	77.1768
Plesovice_2.0	2014	SE01A103	ok	-0.000896223	17867.7	658.632	0.0901406	18.5033	0.232086	0.0525228	0.000992202	0.39121	0.008871	0.0540443	0.000677875	0.553143	0.0168622	0.000519185	307.245	86.055	86.0703	339.304	8.51174	9.1713	335.253	15.2043	15.5775	337.981	20.8128	21.4656	110.434
Plesovice_2.0	2014	SE01A099	ok	0.000754666	20914.2	765.804	0.104541	18.4637	0.23453	0.0538686	0.00102511	0.402097	0.00919983	0.0541605	0.000687959	0.555176	0.0181552	0.00050743	364.58	85.8092	85.8308	340.014	8.63787	9.29111	343.168	15.7031	16.0818	363.666	20.3286	21.0999	93.2618
Plesovice_2.0	2014	SE01A073	ok	0.000112327	11740.2	431.21	0.0821565	18.3735	0.252408	0.0533897	0.00122169	0.400478	0.0106885	0.0544263	0.000747688	0.514721	0.0178142	0.000671995	344.411	103.551	103.567	341.639	9.38663	9.99664	341.995	18.2553	18.5799	356.895	26.9259	27.4915	99.1954
Plesovice_2.0	2014	SE01A106	ok	-0.000882825	18557.3	675.354	0.0922159	18.2762	0.234513	0.05263	0.000977538	0.39688	0.0089596	0.0547158	0.000702092	0.568396	0.0169713	0.000506929	311.89	84.5402	84.5563	343.409	8.81298	9.46655	339.383	15.3232	15.7026	340.149	20.3204	20.997	110.106
Plesovice_2.0	2014	SE01A112	ok	-0.003118	18974.6	692.758	0.0949432	18.2171	0.236756	0.0508555	0.00091279	0.384742	0.00852584	0.0548933	0.000713411	0.58648	0.0166723	0.000528354	233.281	82.8591	82.8683	344.494	8.95431	9.60219	330.521	14.6486	15.0249	334.206	21.1823	21.81	147.673
Plesovice_2.0	2014	SE01A109	ok	-0.000655232	19096.6	705.293	0.0927755	18.2089	0.231724	0.0528424	0.000983931	0.399955	0.00902033	0.0549182	0.00069888	0.564254	0.0161976	0.000562724	321.048	84.6127	84.6298	344.646	8.77182	9.43281	341.616	15.4092	15.7915	324.766	22.5655	23.1233	107.35
Plesovice_2.0	2014	SE01A096	ok	-0.000543595	20265.5	749.768	0.094495	18.0881	0.229824	0.0529852	0.000836804	0.403713	0.00818314	0.0552848	0.000702438	0.626836	0.017707	0.00052036	327.174	71.6885	71.7094	346.886	8.81493	9.48119	344.337	13.9592	14.3868	354.767	20.8512	21.5681	106.025
Plesovice_2.0	2014	SE01A088	ok	-0.0016615	18375.1	645.063	0.0909558	18.0274	0.231543	0.0521116	0.00101924	0.398395	0.00932204	0.0554712	0.000712472	0.548913	0.0163475	0.000487856	289.314	89.3837	89.3968	348.025	8.94005	9.60181	340.484	15.9339	16.3015	327.747	19.5618	20.2143	120.293
Plesovice_2.0	2014	SE01A083	ok	-0.00129733	21378.7	790.172	0.0983896	17.9194	0.21767	0.0524531	0.000994177	0.403423	0.00908189	0.0558055	0.000677879	0.539584	0.0173367	0.000521105	304.219	86.3876	86.4025	350.066	8.50463	9.20561	344.127	15.4941	15.8799	347.411	20.8849	21.5717	115.07
Plesovice_1.99	2015	AU31A040	ok	0.000187838	62327.5	662.353	0.0906899	18.6157	0.227246	0.0533487	0.000488529	0.394963	0.0060272	0.0537181	0.00065575	0.799941	0.0168537	0.000396407	342.669	41.4526	41.4922	337.308	8.23521	8.90757	337.988	10.3155	10.8667	337.812	15.891	16.7361	98.4356
Plesovice_1.99	2015	AU31A050	ok	8.62023e-05	65153.4	677.751	0.0914538	18.5016	0.217997	0.0533144	0.000464192	0.397143	0.00581832	0.0540493	0.00063684	0.804248	0.0168213	0.000398701	341.217	39.4229	39.4642	339.334	7.99647	8.69531	339.574	9.94982	10.5254	337.169	15.9832	16.8206	99.4482
Plesovice_1.99	2015	AU31A044	ok	0.000114376	64694.1	673.225	0.0910067	18.4688	0.220579	0.0533509	0.000452067	0.398121	0.00583003	0.0541453	0.000646675	0.815586	0.0161699	0.000377786	342.766	38.3564	38.3993	339.921	8.11958	8.81096	340.285	9.96616	10.5432	324.216	15.1496	15.9659	99.1701
Plesovice_1.99	2015	AU31A058	ok	0.000348491	62099.2	645.579	0.0897601	18.4642	0.223357	0.0535414	0.000431949	0.399642	0.00581088	0.0541589	0.000655147	0.831953	0.0165032	0.00038661	350.825	36.4669	36.5142	340.004	8.22591	8.90936	341.389	9.92772	10.5106	330.845	15.5009	16.3317	96.9156
Plesovice_1.99	2015	AU31A060	ok	-0.000409233	61557.6	624.89	0.0897331	18.4413	0.220701	0.052941	0.000522734	0.395651	0.0061386	0.0542261	0.000648965	0.771358	0.016934	0.000390402	325.28	44.8348	44.8678	340.415	8.14802	8.8391	338.489	10.5034	11.0469	339.409	15.6497	16.515	104.653
Plesovice_1.99	2015	AU31A055	ok	0.000160375	65162	681.314	0.0911253	18.4264	0.21971	0.0534059	0.000461204	0.399448	0.00588087	0.0542699	0.000647096	0.809895	0.0171735	0.000379034	345.096	39.0753	39.1179	340.683	8.12439	8.81837	341.248	10.048	10.6238	344.167	15.1922	16.1066	98.7213
Plesovice_1.99	2015	AU31A061	ok	-0.000271928	59817.7	612.771	0.0890126	18.3851	0.219585	0.0530754	0.000463109	0.397868	0.00588502	0.0543919	0.000649637	0.807473	0.0167255	0.000393994	331.033	39.5797	39.6184	341.429	8.15581	8.85024	340.101	10.0611	10.6324	335.263	15.7953	16.6327	103.141
5.0 J/cm2
91500_5.2	2014	SE01C045	ok	-0.00101003	11062	78.622	0.35604	5.54502	0.0846577	0.0741611	0.00147107	1.84326	0.0461389	0.180342	0.00275334	0.609932	0.0536509	0.00139336	1044.98	80.0202	80.211	1068.84	32.6368	34.3641	1061.02	53.1175	54.1897	1056.31	54.8669	57.271	102.284
91500_5.2	2014	SE01C046	ok	0.00033659	11395.8	84.7352	0.35482	5.5878	0.087698	0.0750106	0.00168972	1.85009	0.0507937	0.178961	0.00280872	0.571653	0.0524545	0.00143283	1067.91	90.5607	90.7368	1061.3	33.3132	34.9839	1063.46	58.3941	59.3756	1033.35	56.4535	58.6941	99.3808
91500_5.2	2014	SE01C056	ok	0.00119979	11343.4	80.4151	0.352559	5.52224	0.0781059	0.0761683	0.00137206	1.90095	0.0435371	0.181086	0.00256126	0.617562	0.0552635	0.00145953	1098.63	72.0868	72.3208	1072.9	30.3501	32.214	1081.42	49.5351	50.7273	1087.23	57.428	59.863	97.6587
91500_5.2	2014	SE01C065	ok	0.00368513	11065.8	78.9158	0.351291	5.54346	0.0787255	0.0781131	0.00154353	1.94203	0.0472574	0.180393	0.00256185	0.583606	0.0540162	0.00129715	1148.89	78.4915	78.7265	1069.12	30.3662	32.2164	1095.7	53.3256	54.464	1063.32	51.0694	53.6774	93.0569
91500_5.2	2014	SE01C066	ok	0.00444501	11167.4	80.6322	0.35572	5.57424	0.0839129	0.0785471	0.00151303	1.94203	0.0474772	0.179397	0.00270058	0.615764	0.0541212	0.00133238	1159.88	76.3921	76.6382	1063.68	32.0245	33.7667	1095.7	53.5736	54.7068	1065.34	52.4539	55.0057	91.7055
91500_5.2	2014	SE01C075	ok	-9.30386e-05	11322.1	78.6763	0.343978	5.63388	0.0853158	0.0743535	0.0016193	1.81889	0.0482475	0.177498	0.00268791	0.570892	0.055754	0.00130721	1050.2	87.7864	87.9621	1053.29	31.9007	33.6161	1052.28	55.8254	56.83	1096.62	51.4226	54.1742	100.294
91500_5.2	2014	SE01C084	ok	0.00362487	11731.8	83.3476	0.353685	5.59961	0.0928256	0.077693	0.00144827	1.91221	0.0477014	0.178584	0.00296041	0.664531	0.0516951	0.0013014	1138.17	74.1623	74.4064	1059.23	35.1181	36.7007	1085.36	54.1498	55.2504	1018.76	51.2938	53.6826	93.0647
91500_5.2	2014	SE01C085	ok	0.00319424	11015.4	79.4112	0.343736	5.55703	0.0811569	0.0776109	0.00153795	1.92483	0.0473825	0.179952	0.00262809	0.593277	0.0547313	0.00142571	1136.07	78.8625	79.0913	1066.71	31.1574	32.9553	1089.75	53.6513	54.7708	1077.03	56.1117	58.5559	93.8955
91500_5.03	2015	AU31A082	ok	0.00100955	53031.7	91.7719	0.345001	5.624	0.0474917	0.0753415	0.000614934	1.8463	0.0216833	0.17781	0.00150151	0.719032	0.0534878	0.000882626	1076.75	32.7693	33.2609	1055	17.8178	20.7419	1062.11	24.9473	27.16	1053.19	34.7582	38.4204	97.9795
91500_5.03	2015	AU31A120	ok	0.00180764	54675.3	94.5715	0.345489	5.59642	0.0479854	0.076189	0.000580887	1.87626	0.0215279	0.178686	0.0015321	0.747293	0.0535687	0.000859524	1099.17	30.5085	31.0579	1059.79	18.1739	21.073	1072.74	24.6169	26.9001	1054.74	33.8471	37.6087	96.4174
91500_5.03	2015	AU31A093	ok	0.00125356	50218.7	92.5408	0.34522	5.59369	0.0546996	0.0757418	0.000683412	1.86616	0.0248303	0.178773	0.00174818	0.734941	0.0546955	0.00100044	1087.38	36.1685	36.6233	1060.27	20.7363	23.3212	1069.17	28.4518	30.4359	1076.34	39.3749	42.782	97.5065
91500_5.03	2015	AU31A105	ok	-0.000816871	53200.3	95.703	0.346688	5.58155	0.0471179	0.0740833	0.000672246	1.82927	0.0226714	0.179162	0.00151244	0.681131	0.0549128	0.000865952	1042.86	36.6176	37.0311	1062.39	17.9369	20.8824	1056.02	26.1759	28.2694	1080.51	34.0783	37.9923	101.873
91500_5.03	2015	AU31A083	ok	0.000149313	49909.1	91.5659	0.347272	5.58977	0.0500488	0.0748406	0.000733381	1.84525	0.0244934	0.178898	0.00160179	0.674537	0.0542394	0.000913802	1063.35	39.4218	39.8213	1060.95	18.9988	21.7941	1061.74	28.1865	30.1612	1067.6	35.973	39.6161	99.7746
91500_5.03	2015	AU31A069	ok	-8.99412e-05	52516.7	92.5151	0.346878	5.59271	0.0446566	0.0746208	0.000564441	1.83886	0.0202252	0.178804	0.00142771	0.725971	0.0544931	0.000897846	1057.43	30.4571	30.9668	1060.44	16.9348	20.0176	1059.45	23.3054	25.6489	1072.46	35.3406	39.075	100.285
91500_5.03	2015	AU31A121	ok	0.0005509	53988.4	96.3822	0.346594	5.57402	0.0491665	0.0752804	0.000635587	1.86134	0.0227272	0.179404	0.00158246	0.722405	0.0548308	0.000922386	1075.12	33.9056	34.3795	1063.72	18.7653	21.6047	1067.46	26.0677	28.2133	1078.94	36.3006	39.9875	98.939
91500_5.03	2015	AU31A070	ok	-0.000277772	53240.3	92.5354	0.348927	5.56244	0.0437163	0.0746609	0.000571776	1.84987	0.0202994	0.179777	0.0014129	0.716201	0.0531671	0.000862259	1058.51	30.8314	31.336	1065.76	16.752	19.8921	1063.38	23.3379	25.6951	1047.03	33.9613	37.6596	100.685
91500_5.03	2015	AU31A106	ok	-0.000303424	53082.2	91.9044	0.350808	5.56211	0.0500499	0.0746415	0.000684876	1.84949	0.0237688	0.179788	0.0016178	0.70018	0.0533862	0.000819052	1057.99	36.9425	37.3642	1065.82	19.1812	21.9772	1063.25	27.3287	29.3668	1051.24	32.2562	36.1589	100.74
91500_5.03	2015	AU31A092	ok	0.000209343	53409.5	92.4802	0.348946	5.5746	0.0482583	0.0749899	0.00062864	1.85396	0.0223412	0.179385	0.0015529	0.718377	0.0541716	0.000847503	1067.36	33.7041	34.174	1063.61	18.415	21.3006	1064.84	25.6638	27.8303	1066.3	33.3641	37.2542	99.6493
Mudtank_5.2	2014	SE01C047	ok	0.00625548	1851.77	22.3491	0.514433	8.40794	0.213878	0.0686291	0.00401476	1.12495	0.071761	0.118935	0.00302544	0.398768	0.037011	0.00149168	886.714	241.802	241.848	724.432	36.8557	37.5701	765.341	97.6432	97.9493	734.565	59.2114	60.3022	81.6985
Mudtank_5.2	2014	SE01C049	ok	-0.000470093	1813.49	21.4874	0.517344	8.4408	0.219893	0.063013	0.00390303	1.02887	0.0691352	0.118472	0.00308634	0.387692	0.0368981	0.00148122	707.745	263.468	263.494	721.764	37.6056	38.3008	718.36	96.5412	96.8139	732.363	58.7994	59.8912	101.981
Mudtank_5.2	2014	SE01C050	ok	-0.00165354	1916.72	22.3835	0.523137	8.50113	0.202424	0.0618948	0.00337806	1.00344	0.0597502	0.117631	0.00280097	0.399885	0.035383	0.00127533	669.543	233.612	233.638	716.917	34.1416	34.8958	705.553	84.0251	84.3274	702.808	50.6636	51.828	107.076
Mudtank_5.2	2014	SE01C052	ok	0.000958635	1970.6	22.7254	0.505601	8.34789	0.216225	0.0644168	0.00319164	1.06349	0.0594585	0.119791	0.00310279	0.463287	0.0379281	0.00152362	754.425	209.158	209.196	729.359	37.7834	38.4899	735.543	82.2465	82.582	752.43	60.4523	61.5733	96.6774
Mudtank_5.2	2014	SE01C054	ok	0.0103315	1845.71	21.6985	0.519246	8.53928	0.212948	0.0716647	0.00401088	1.15664	0.0708689	0.117106	0.00292033	0.406999	0.0370531	0.00160908	975.547	228.172	228.23	713.885	35.605	36.3228	780.372	95.6293	95.9542	735.385	63.8699	64.8847	73.1779
Mudtank_5.2	2014	SE01C055	ok	0.0104666	1998.11	23.3816	0.523235	8.53123	0.221815	0.0717951	0.00373837	1.15983	0.0675028	0.117216	0.00304766	0.446737	0.0362572	0.0014299	979.251	212.163	212.226	714.522	37.1556	37.8452	781.876	91.0111	91.3538	719.866	56.7796	57.8717	72.9662
Mudtank_5.2	2014	SE01C058	ok	0.00299632	1864.95	21.0708	0.508307	8.33411	0.208064	0.066129	0.00383269	1.09357	0.0690106	0.119989	0.00299556	0.39561	0.036111	0.00154249	809.553	242.505	242.543	730.5	36.4743	37.208	750.236	94.6886	94.9919	717.015	61.255	62.2606	90.235
Mudtank_5.2	2014	SE01C060	ok	-0.000508466	1835.58	21.7647	0.509177	8.53959	0.217821	0.0627461	0.00374086	1.01266	0.065667	0.117102	0.00298694	0.393349	0.0367649	0.00156341	698.709	253.97	253.997	713.86	36.4172	37.1192	710.215	92.1096	92.389	729.766	62.0659	63.094	102.168
Mudtank_5.2	2014	SE01C062	ok	-0.000321649	1943.04	22.8012	0.487929	8.38665	0.220851	0.063267	0.00360681	1.03968	0.0652895	0.119237	0.00313995	0.419343	0.034692	0.00148895	716.294	242.156	242.186	726.172	38.2455	38.9376	723.76	90.9006	91.1946	689.314	59.1696	60.1319	101.379
Mudtank_5.2	2014	SE01C063	ok	-0.000864943	1967.56	23.0217	0.509204	8.35959	0.213236	0.0628863	0.00383188	1.03677	0.0684862	0.119623	0.00305134	0.38615	0.0381355	0.00168189	703.461	259.368	259.395	728.394	37.1597	37.876	722.309	95.4273	95.7063	756.469	66.7251	67.7533	103.544
Mudtank_5.2	2014	SE01C068	ok	-0.00476114	1940.59	22.5552	0.506624	8.39032	0.210968	0.0596032	0.00319961	0.979046	0.0580367	0.119185	0.0029968	0.424168	0.0368331	0.00152805	588.255	232.91	232.931	725.871	36.5028	37.2268	693.115	82.1741	82.4723	731.095	60.6603	61.7156	123.394
Mudtank_5.2	2014	SE01C070	ok	0.00529299	1984.58	23.3033	0.516593	8.41899	0.210035	0.0678097	0.003509	1.11005	0.0637698	0.118779	0.00296327	0.43427	0.0365371	0.00144985	861.84	214.733	214.782	723.532	36.101	36.8282	758.2	87.1134	87.45	725.325	57.5643	58.658	83.9521
Mudtank_5.2	2014	SE01C071	ok	0.00465277	2178.94	25.4093	0.51065	8.41538	0.203841	0.0672915	0.00324977	1.10204	0.0595412	0.11883	0.00287835	0.448331	0.035734	0.00154787	845.905	200.906	200.956	723.826	35.0656	35.8144	754.338	81.5107	81.8667	709.659	61.4796	62.4614	85.5682
Mudtank_5.2	2014	SE01C073	ok	0.00167089	1940.42	22.9777	0.494255	8.37946	0.22572	0.0649251	0.00359191	1.06785	0.0657081	0.119339	0.00321467	0.437767	0.0368137	0.00135187	770.994	232.921	232.957	726.76	39.1538	39.8313	737.683	90.7841	91.09	730.718	53.6666	54.8554	94.2628
Mudtank_5.2	2014	SE01C074	ok	0.00904977	1997.18	24.6698	0.489424	8.53732	0.217429	0.0706149	0.00386796	1.13995	0.0688609	0.117133	0.00298314	0.421609	0.0391686	0.00155489	945.395	224.352	224.408	714.04	36.3704	37.0736	772.487	93.3269	93.6531	776.573	61.6559	62.8264	75.5282
Mudtank_5.2	2014	SE01C077	ok	0.00344011	2091.78	23.4473	0.510731	8.25475	0.191093	0.0666954	0.00352609	1.11353	0.0642673	0.121142	0.00280437	0.401101	0.0399933	0.00153174	827.367	220.585	220.628	737.135	34.1285	34.9256	759.874	87.7117	88.0475	792.608	60.7134	61.9509	89.0941
Mudtank_5.2	2014	SE01C078	ok	8.02666e-05	2036.28	23.6923	0.500673	8.54053	0.217314	0.0632282	0.00317776	1.02032	0.0574776	0.117089	0.00297932	0.451691	0.0377105	0.00148673	714.991	213.527	213.56	713.785	36.3245	37.0281	714.076	80.4517	80.775	748.193	58.9949	60.1303	99.8314
Mudtank_5.2	2014	SE01C080	ok	-0.0026434	1979.31	22.8099	0.487739	8.32214	0.226178	0.0615146	0.00319585	1.01872	0.0597298	0.120161	0.00326574	0.463534	0.0377288	0.00159844	656.344	222.862	222.889	731.493	39.7609	40.4368	713.271	83.6411	83.9513	748.55	63.4268	64.4852	111.45
Mudtank_5.2	2014	SE01C081	ok	-0.00139007	1996.54	23.2606	0.500439	8.4566	0.219776	0.0622178	0.00313417	1.01398	0.0574758	0.118251	0.00307318	0.458491	0.0361242	0.00153495	680.674	215.225	215.255	720.488	37.4491	38.1447	710.885	80.5903	80.9101	717.272	60.9551	61.9664	105.849
Mudtank_5.2	2014	SE01C083	ok	0.00178212	1981.26	23.3293	0.501279	8.42359	0.19524	0.0649085	0.00371458	1.06198	0.0655703	0.118714	0.00275153	0.375389	0.0372039	0.00151115	770.457	240.958	240.993	723.159	33.5224	34.3035	734.8	90.738	91.0415	738.323	59.9784	61.0665	93.861
Mudtank_5.03	2015	AU31A091	ok	0.00566734	5831	16.0316	0.515304	8.83028	0.125533	0.067163	0.0015408	1.04826	0.0282912	0.113247	0.00160993	0.526743	0.0365783	0.00105825	841.927	95.4969	95.6007	691.576	19.6631	20.8588	728.019	39.2967	39.98	726.128	42.0155	43.5051	82.142
Mudtank_5.03	2015	AU31A085	ok	-0.000465614	5501.26	14.9017	0.52017	8.6874	0.133124	0.0624407	0.00153721	0.990583	0.0287251	0.115109	0.00176391	0.52844	0.0352203	0.00109912	688.31	105.052	105.115	702.352	21.5254	22.6565	699.017	40.5405	41.1519	699.631	43.6668	45.0006	102.04
Mudtank_5.03	2015	AU31A089	ok	-0.000500405	5671.09	15.3323	0.512621	8.6867	0.119195	0.0624137	0.00167011	0.990233	0.029778	0.115118	0.00157961	0.456294	0.0351909	0.00102116	687.386	114.201	114.259	702.406	19.2762	20.5318	698.839	42.0306	42.6203	699.058	40.5703	42.0002	102.185
Mudtank_5.03	2015	AU31A075	ok	0.00067512	5138	14.2389	0.519255	8.59399	0.131748	0.0635926	0.00172638	1.01982	0.0317949	0.11636	0.00178383	0.491717	0.0358347	0.00102214	727.187	115.109	115.173	709.581	21.7561	22.8983	713.824	44.5097	45.0909	711.624	40.5964	42.0764	97.5789
Mudtank_5.03	2015	AU31A080	ok	0.0022022	6000.76	16.3985	0.512782	8.57483	0.114993	0.0648933	0.0017284	1.04301	0.0311025	0.11662	0.00156395	0.449716	0.0359498	0.000946872	769.963	112.154	112.227	711.082	19.072	20.3707	725.412	43.2637	43.8809	713.869	37.6048	39.2078	92.3528
Mudtank_5.03	2015	AU31A077	ok	0.00155164	5963.37	16.1555	0.517847	8.50976	0.113022	0.0645115	0.00155097	1.0448	0.0286968	0.117512	0.00156074	0.483554	0.0358217	0.00106132	757.527	101.439	101.518	716.228	19.0251	20.3451	726.302	39.8978	40.5678	711.37	42.1528	43.579	94.5482
Mudtank_5.03	2015	AU31A072	ok	-0.00260517	5825.87	16.4292	0.517254	8.46068	0.125211	0.061208	0.00150166	0.997046	0.028567	0.118194	0.00174917	0.516522	0.0364843	0.00114486	645.617	105.43	105.485	720.159	21.3156	22.5143	702.309	40.2447	40.8662	724.295	45.4561	46.8295	111.546
M257_5.03	2015	AU31A084	ok	-0.000603882	252145	869.572	0.271694	10.8325	0.0826052	0.0585624	0.00025689	0.745081	0.00655475	0.092315	0.000703966	0.866817	0.0286917	0.000369002	549.916	19.1558	19.3755	569.214	8.6813	10.4014	565.366	9.94746	11.4727	571.759	14.7067	17.1835	103.509
M257_5.03	2015	AU31A087	ok	-0.000117555	254079	859.289	0.271055	10.8052	0.0886028	0.0589965	0.000277648	0.752496	0.00711449	0.0925478	0.000758891	0.867309	0.0285618	0.000375189	566.018	20.4955	20.7131	570.587	9.35762	10.9794	569.671	10.7719	12.2149	569.207	14.9543	17.3756	100.807
M257_5.03	2015	AU31A079	ok	-0.000476514	251150	855.048	0.273042	10.7587	0.0808962	0.0587677	0.000264694	0.752822	0.00659845	0.0929482	0.000698892	0.857866	0.028572	0.000363367	557.553	19.6434	19.8637	572.95	8.6162	10.3679	569.86	9.9896	11.5319	569.408	14.483	16.9733	102.762
M257_5.03	2015	AU31A076	ok	-0.000601806	248694	854.262	0.27155	10.7353	0.0803368	0.0586979	0.000279593	0.753565	0.00668469	0.0931506	0.000697085	0.843606	0.0288721	0.000367686	554.961	20.7828	20.9892	574.143	8.59311	10.3555	570.291	10.1178	11.6453	575.305	14.653	17.1662	103.457
M257_5.03	2015	AU31A073	ok	-0.000654697	246408	861.453	0.272688	10.6803	0.0783343	0.0587317	0.000273944	0.75788	0.00658745	0.0936301	0.000686725	0.84382	0.0289817	0.000366412	556.215	20.3469	20.5586	576.97	8.46351	10.2643	572.786	9.95726	11.5187	577.457	14.6014	17.1397	103.731
NIST610_5.2	2014	SE01C044	ok		76332.7	454.907	1.00942	4.74428	0.0848013	0.912186	0.00345568	26.4987	0.484171	0.21078	0.00376757	0.97827	0.457028	0.00771213
NIST610_5.2	2014	SE01C067	ok		76136.1	452.773	1.00132	4.59491	0.082189	0.907801	0.00332906	27.2286	0.497169	0.217632	0.00389278	0.979624	0.45836	0.00776231
NIST610_5.2	2014	SE01C086	ok		74956.1	466.634	0.984285	4.68455	0.0856635	0.909945	0.00327767	26.7707	0.498946	0.213468	0.00390355	0.981146	0.45911	0.00778459
NIST610_5.03	2015	AU31A094	ok		306717	462.388	0.993043	4.71492	0.0681369	0.909116	0.00227282	26.5741	0.389735	0.212093	0.00306503	0.985364	0.457352	0.00556849
NIST610_5.03	2015	AU31A122	ok		302902	460.304	0.991605	4.76137	0.0668024	0.910285	0.00227825	26.3486	0.375508	0.210023	0.00294664	0.984459	0.454518	0.00553624
NIST610_5.03	2015	AU31A068	ok		299691	464.52	0.987292	4.73739	0.0626436	0.909784	0.00220626	26.4674	0.355822	0.211087	0.00279125	0.983596	0.459437	0.00557906
NIST610_5.03	2015	AU31A123	ok		303825	462.179	0.988715	4.75793	0.0666524	0.908646	0.00221861	26.3202	0.37427	0.210175	0.00294429	0.985148	0.457386	0.00561413
NIST610_5.03	2015	AU31A067	ok		302392	458.109	0.992797	4.69574	0.0592392	0.908936	0.0023105	26.6773	0.343312	0.212959	0.00268659	0.980298	0.460525	0.0055048
PLesovice_5.2	2014	SE01C048	ok	0.000774973	41060.8	1018.13	0.15197	18.1529	0.225683	0.0540187	0.000661125	0.41012	0.00715482	0.0550877	0.00068487	0.712632	0.017926	0.000382983	370.85	55.1264	55.1613	345.682	8.59528	9.27277	348.961	12.1757	12.6766	359.115	15.3448	16.3285	93.2134
PLesovice_5.2	2014	SE01C051	ok	0.000681845	41601.3	994.437	0.143841	18.1471	0.223659	0.0539462	0.000731053	0.4097	0.00750484	0.0551052	0.000679161	0.67283	0.01724	0.000377456	367.826	61.0717	61.1027	345.789	8.52356	9.20674	348.659	12.7734	13.2508	345.488	15.1284	16.0533	94.0089
PLesovice_5.2	2014	SE01C053	ok	-0.000209855	44720.2	1054.89	0.144987	18.0923	0.220744	0.0532522	0.000587558	0.405655	0.00667303	0.0552723	0.000674378	0.741703	0.0174759	0.000377717	338.57	49.982	50.0141	346.809	8.46286	9.15449	345.741	11.3749	11.8998	350.176	15.1371	16.086	102.434
PLesovice_5.2	2014	SE01C057	ok	0.00179664	38221.3	934.49	0.118918	18.161	0.232187	0.054838	0.00080355	0.416154	0.00809276	0.055063	0.000703976	0.657438	0.0179036	0.000418506	404.649	65.6105	65.6454	345.531	8.83517	9.495	353.297	13.7408	14.1975	358.67	16.7682	17.6707	85.3902
PLesovice_5.2	2014	SE01C059	ok	9.9187e-05	41668.6	980.343	0.146225	18.1083	0.22346	0.053494	0.000750341	0.407135	0.00760619	0.0552232	0.000681462	0.660529	0.0172165	0.00038134	348.824	63.4256	63.4524	346.509	8.55196	9.23578	346.81	12.9584	13.4243	345.023	15.2843	16.1979	99.3366
PLesovice_5.2	2014	SE01C061	ok	0.00125732	24210	585.726	0.0838175	17.9355	0.23879	0.0545038	0.000916027	0.418818	0.00897991	0.0557553	0.000742314	0.620947	0.0174465	0.000511697	390.947	75.4339	75.4622	349.759	9.31324	9.95637	355.205	15.232	15.6496	349.591	20.5067	21.2145	89.4645
PLesovice_5.2	2014	SE01C064	ok	0.00105	23948	579.876	0.0832207	17.899	0.237582	0.0543532	0.000777112	0.418513	0.00816477	0.055869	0.000741576	0.680376	0.0180515	0.000535099	384.737	64.2417	64.2739	350.454	9.30348	9.94971	354.987	13.8509	14.3083	361.607	21.4382	22.1628	91.0892
PLesovice_5.2	2014	SE01C069	ok	0.000887739	40619.7	975.593	0.154687	18.0447	0.228362	0.0541573	0.000832386	0.413636	0.0082353	0.0554179	0.000701332	0.635643	0.0174628	0.000381409	376.615	69.1588	69.1875	347.699	8.80049	9.47079	351.491	13.996	14.4401	349.916	15.2852	16.224	92.322
PLesovice_5.2	2014	SE01C072	ok	-0.000263296	26405.2	644.453	0.0880611	17.982	0.236022	0.053258	0.00073791	0.408188	0.0077904	0.0556113	0.000729924	0.687726	0.0172505	0.000460854	338.82	62.7624	62.788	348.88	9.15843	9.80854	347.569	13.2669	13.7244	345.697	18.4709	19.2367	102.969
PLesovice_5.2	2014	SE01C076	ok	-0.000346969	24738.2	606.186	0.0874748	18.1485	0.234605	0.053117	0.000888904	0.403371	0.00852975	0.0551009	0.000712287	0.611314	0.01719	0.000540654	332.812	75.8867	75.9072	345.762	8.93931	9.59283	344.09	14.5524	14.9624	344.495	21.6699	22.3217	103.891
PLesovice_5.2	2014	SE01C079	ok	-0.000314915	26104.4	640.787	0.0889867	18.0613	0.238415	0.0531812	0.000854366	0.405809	0.00843789	0.055367	0.000730862	0.634851	0.0179175	0.000737675	335.55	72.8148	72.8364	347.388	9.17126	9.81516	345.853	14.3825	14.8014	358.946	29.5561	30.0781	103.528
PLesovice_5.2	2014	SE01C082	ok	-0.00130189	28050.2	690.803	0.0892063	18.1734	0.236327	0.0523371	0.000788282	0.396903	0.00789783	0.0550253	0.000715548	0.65351	0.0169937	0.000468143	299.172	68.7104	68.7286	345.301	8.98056	9.62961	339.4	13.5072	13.9362	340.595	18.7654	19.4979	115.419
Plesovice_5.03	2015	AU31A071	ok	-3.85268e-05	104085	626.535	0.0890716	18.4871	0.143208	0.0532201	0.000371404	0.396753	0.00413666	0.0540919	0.000419015	0.742964	0.0169523	0.000311139	337.208	31.6211	31.6714	339.595	5.26125	6.27405	339.291	7.07509	7.86276	339.772	12.4722	13.5443	100.708
Plesovice_5.03	2015	AU31A090	ok	0.000120758	105701	556.567	0.0868681	18.4518	0.183922	0.0533633	0.000487944	0.398581	0.00539138	0.0541953	0.000540203	0.736905	0.0170674	0.000407292	343.289	41.3871	41.4269	340.227	6.78257	7.59801	340.618	9.21471	9.83714	342.059	16.3256	17.1696	99.1081
Plesovice_5.03	2015	AU31A086	ok	-0.00065728	110267	624.592	0.0885522	18.4485	0.158694	0.0527382	0.000339122	0.393983	0.00423131	0.054205	0.000466274	0.800948	0.0171404	0.000314938	316.562	29.2437	29.2916	340.287	5.85432	6.7826	337.275	7.24454	8.00688	343.511	12.6233	13.7061	107.495
Plesovice_5.03	2015	AU31A081	ok	-0.00018054	106059	622.432	0.0886192	18.4412	0.154024	0.0531251	0.000352368	0.39703	0.00423451	0.0542264	0.000452907	0.783102	0.017229	0.000318521	333.159	30.0756	30.1272	340.417	5.68643	6.63891	339.492	7.24168	8.01386	345.27	12.7664	13.8486	102.179
Plesovice_5.03	2015	AU31A078	ok	8.58036e-05	105213	613.894	0.0890089	18.4008	0.143671	0.0533567	0.000367533	0.399636	0.00416102	0.0543454	0.000424321	0.749888	0.0171925	0.000326548	343.011	31.1793	31.232	341.145	5.32722	6.33792	341.384	7.109	7.90251	344.544	13.0883	14.1417	99.4559
Plesovice_5.03	2015	AU31A074	ok	-0.000702037	109822	610.493	0.0888631	18.4021	0.140871	0.0527218	0.00041008	0.394853	0.00430917	0.0543416	0.000415993	0.701447	0.0176279	0.000358729	315.854	35.378	35.4175	341.122	5.22267	6.25016	337.908	7.37542	8.12818	353.195	14.3751	15.3878	108
Plesovice_5.03	2015	AU31A088	ok	-0.000197883	108831	594.422	0.0875239	18.3758	0.158958	0.053139	0.000466419	0.398547	0.00491154	0.0544195	0.00047075	0.701937	0.0177102	0.000323646	333.748	39.7957	39.8348	341.598	5.90992	6.83727	340.594	8.39469	9.07345	354.83	12.9687	14.0928	102.352

## Sheet: Laser Cell Tests
Identifier	Year	File number	Comments	f206c	206Pb cps	Uppm1	Th/U	238U/206Pb	1s	207Pb/206Pb	1s	207Pb/235U	1s	206Pb/238U	1s	Rho	208Pb/232Th	1s	207Pb/206Pb	2s	2ssys	206Pb/238U	2s	2ssys	207Pb/235U	2s	2ssys	208Pb/232Th	2s	2ssys	% conc4	Mass 56 cps in 30sec background:	% Deviation from Primary standard degassing trend:
	Analysed								abs		abs		abs		abs			abs		abs	abs		abs	abs		abs	abs		abs	abs
Poorly degassed sample mounts:
91500 - Primary - Centre	2012	AP26B001	ok	-8.03e-05	15488.1	84.7473	0.356107	5.55669	0.0597479	0.0748645	0.00120237	1.85683	0.0358881	0.179963	0.00193504	0.556324	0.0533725	0.00103693	1063.99	64.6047	64.8495	1066.77	22.9408	25.3292	1065.86	41.2011	42.5869	1050.97	40.8369	43.9833	100.262	38973.7	0.033364	Systematic Errors:							91500 - errors from TIMS in Horstwood et al. 2016 and Wiedenbeck 1995 (208Pb/232Th age only). NIST610 errors for 7/6Pb ratios are from Baker et al. 2004. All 2 sigma
91500 - Primary - Centre	2012	AP26B002	ok	0.000160888	15236.8	84.7546	0.355924	5.57344	0.059855	0.0749569	0.00117944	1.85353	0.0353108	0.179422	0.00192688	0.563729	0.0530515	0.000931917	1066.47	63.2713	63.5224	1063.82	22.8494	25.2338	1064.69	40.5657	41.9695	1044.81	36.7069	40.1392	99.7514	38159.4	-0.00835893	1) Uncertaintly in Primary Ref. Material.							76 error %	206/238 error %	207/235 error%	208/232 error %
91500 - Primary - Centre	2012	AP26B011	ok	-0.00156081	17808.6	103.715	0.360425	5.56412	0.0598151	0.0735729	0.00107988	1.82236	0.0331549	0.179723	0.00193205	0.590881	0.0540678	0.000940135	1028.9	59.3549	59.6041	1065.46	22.9077	25.2936	1053.53	38.3348	39.7869	1064.31	37.0126	40.5416	103.554	31356.8	0.0029251	2) Long Term variance in secondary stds.							0.00549535	0.04	0.06	0.26465
91500 - Primary - Centre	2012	AP26B019	ok	0.00241257	16023.5	93.183	0.355924	5.62331	0.0608955	0.0765228	0.00119329	1.87547	0.0356062	0.177831	0.00192575	0.570397	0.0523364	0.000914162	1107.91	62.3177	62.5928	1055.11	22.8519	25.199	1072.47	40.7219	42.1407	1031.08	36.0199	39.4247	95.2346	26104.7	0.00182222	3)Decay constant errors							0.5	1	1	1.5
91500 - Primary - Centre	2012	AP26B021	ok	0.00151776	18354.5	107.983	0.360361	5.54258	0.0585419	0.0762994	0.00121533	1.89724	0.0362603	0.180421	0.00190565	0.552644	0.0531119	0.000934021	1102.07	63.7098	63.9761	1069.28	22.5878	25.0207	1080.12	41.2869	42.7066	1045.97	36.7887	40.2213	97.0246	24908.5	-0.0461342	4) Model common Pb uncertainty							0.173046	0.107	0.136	0.31		Decay constant errors from Jaffey et al. 1971 and Amelin and Zaitsev 2002 (232Th)
91500 - Primary - Centre	2012	AP26B028	ok	0.00338297	11112.3	69.6252	0.334385	5.62572	0.0659432	0.0773214	0.00146434	1.89423	0.0421891	0.177755	0.0020836	0.52629	0.0537808	0.00108035	1128.62	75.4516	75.6876	1054.7	24.7258	26.9083	1079.07	48.0669	49.2893	1058.81	42.5386	45.6114	93.45	21090	0.000623552	5) uncertainty from counting stats, excess uncert, etc.							No correction applied	No correction applied	No correction applied	No correction applied
91500 - Primary - Centre	2012	AP26B036	ok	-0.00199126	16473.8	106.431	0.355432	5.54423	0.0607244	0.0733425	0.00106879	1.82317	0.0332358	0.180368	0.00197551	0.600817	0.0540625	0.000991318	1022.55	58.9864	59.2341	1068.98	23.4165	25.7701	1053.83	38.4218	39.8716	1064.21	39.0278	42.3887	104.541	17427.1	-0.0876953	Total systematic uncertainty							0.279975	1.01305	1.0221	2.41614
91500 - Primary - Centre	2012	AP26B038	ok	0.00223571	11565.6	79.0931	0.347526	5.66861	0.068357	0.0760865	0.00135734	1.84988	0.0398331	0.17641	0.0021273	0.560022	0.0529167	0.00111272	1096.48	71.413	71.6482	1047.33	25.2593	27.3707	1063.39	45.7954	47.0404	1042.23	43.8313	46.7294	95.5181	16628.2	-0.0811843
91500 - Primary - Centre	2012	AP26B046	ok	0.000851562	13901.6	77.0921	0.365898	5.53594	0.0648535	0.0757843	0.00122906	1.88669	0.0377461	0.180638	0.00211617	0.585558	0.0529593	0.00100641	1088.51	64.9988	65.2535	1070.46	25.0808	27.2971	1076.42	43.0708	44.4243	1043.04	39.643	42.8302	98.3419	39799.6	-0.502548
91500 - Primary - Centre	2012	AP26B054	ok	-0.00111742	14126.4	84.1445	0.364071	5.5265	0.0626158	0.0741941	0.00122974	1.85025	0.0371477	0.180946	0.00205014	0.564331	0.0537834	0.00100673	1045.87	66.8542	67.0828	1072.14	24.295	26.5837	1063.52	42.7047	44.0375	1058.86	39.6397	42.9209	102.512	11920.1	0.157527
91500 - Primary - Centre	2012	AP26B055	ok	0.000784306	13840.4	81.3415	0.360823	5.56824	0.0610912	0.0755142	0.00124683	1.86906	0.0370521	0.17959	0.00197035	0.55344	0.0562992	0.00109278	1081.35	66.2448	66.4914	1064.73	23.3632	25.7037	1070.2	42.4311	43.7888	1107.05	42.9763	46.2933	98.4637	11725.2	0.117532
91500 - Primary - Centre	2012	AP26B063	ok	0.00122718	13822.2	85.9374	0.360378	5.57906	0.0632872	0.075815	0.00134989	1.87286	0.039539	0.179242	0.00203326	0.537322	0.0537051	0.00110558	1089.32	71.351	71.5834	1062.83	24.1128	26.3792	1071.54	45.2438	46.5227	1057.35	43.5336	46.5327	97.5685	10586.5	0.0954483
91500 - Primary - Centre	2012	AP26B065	ok	-0.000631041	14021.5	89.2925	0.35903	5.60765	0.0639259	0.0740702	0.00129294	1.82043	0.0379531	0.178328	0.0020329	0.546794	0.0534402	0.00103486	1042.5	70.4438	70.6594	1057.83	24.1181	26.3637	1052.84	43.9001	45.172	1052.27	40.7543	43.9141	101.471	10418.7	0.0419753
91500 - Primary - Centre	2012	AP26B071	ok	0.000449737	15331.1	96.3461	0.372921	5.59288	0.0611725	0.0750725	0.00113352	1.84994	0.0344908	0.178799	0.00195562	0.586644	0.0531572	0.000964314	1069.57	60.6859	60.9492	1060.41	23.1966	25.5342	1063.41	39.653	41.0846	1046.84	37.9811	41.32	99.1435	10195.6	0.00437071
91500 - Primary - Centre	2012	AP26B077	ok	0.00149221	14884.1	94.4281	0.36256	5.63316	0.0619725	0.0756877	0.00116973	1.85177	0.0351289	0.17752	0.00195297	0.579921	0.0532479	0.000934597	1085.95	61.9637	62.2295	1053.41	23.178	25.488	1064.06	40.3714	41.78	1048.58	36.8091	40.2563	97.0038	10393.3	-0.0754072
91500 - Primary - Centre	2012	AP26B079	ok	0.000378633	15091.2	94.2857	0.370277	5.58142	0.0626616	0.0750874	0.00121213	1.85411	0.0364573	0.179166	0.00201146	0.570961	0.054469	0.00094373	1069.97	64.8776	65.1241	1062.42	23.8551	26.1421	1064.89	41.8779	43.2396	1072	37.147	40.7132	99.2941	10552.7	-0.101421
91500 bottom center	2012	AP26B047	ok	-0.00286162	16024.1	84.7888	0.354194	5.51196	0.0594013	0.0728267	0.00104484	1.82094	0.0326744	0.181424	0.00195517	0.600591	0.0520739	0.000982157	1008.25	58.1996	58.4436	1074.75	23.1647	25.566	1053.02	37.7903	39.2612	1026.04	38.7039	41.8612	106.595	13611.8	0.758883
91500 bottom center	2012	AP26B048	ok	0.00159369	16621.4	90.5417	0.354063	5.52742	0.0608134	0.0764643	0.00116025	1.90655	0.0357339	0.180916	0.00199046	0.587009	0.0528735	0.000902918	1106.38	60.6524	60.9343	1071.98	23.5881	25.9386	1083.38	40.611	42.062	1041.4	35.5677	39.0781	96.8903	13335.1	0.618075
91500 bottom center	2012	AP26B049	ok	-0.00127232	17210.8	94.6195	0.360179	5.52457	0.0588768	0.0740769	0.00115338	1.84798	0.0348677	0.18101	0.00192907	0.564832	0.0535813	0.000916924	1042.68	62.8323	63.074	1072.49	22.8596	25.2801	1062.71	40.1024	41.5167	1054.98	36.1072	39.6566	102.858	13070.1	0.579487
91500 bottom center	2012	AP26B050	ok	-0.00195232	16085.2	89.0296	0.351466	5.52076	0.0610436	0.0735313	0.00108015	1.83563	0.0337499	0.181134	0.00200282	0.601386	0.0535234	0.00101004	1027.75	59.4136	59.6619	1073.17	23.7323	26.0747	1058.3	38.9158	40.3598	1053.87	39.7753	43.0165	104.419	12816.7	0.536284
91500 bottom center	2012	AP26B051	ok	-0.00143419	16246.8	89.4528	0.353399	5.48127	0.0611766	0.0742329	0.00123874	1.8665	0.0374711	0.182439	0.00203621	0.55595	0.0535663	0.00100672	1046.93	67.2975	67.5251	1080.29	24.1142	26.4522	1069.29	42.9333	44.2734	1054.69	39.6436	42.8997	103.186	12575	0.539659
91500 bottom center	2012	AP26B052	ok	-0.00182681	16063.7	89.1034	0.353667	5.50817	0.0608451	0.0737211	0.00117425	1.84458	0.0357549	0.181548	0.00200544	0.569874	0.0531824	0.00102969	1032.96	64.3725	64.6041	1075.43	23.759	26.1085	1061.5	41.1516	42.5279	1047.33	40.5555	43.701	104.111	12345	0.581063
91500 bottom center	2012	AP26B053	ok	-0.000694276	15979.4	89.7729	0.351767	5.52075	0.0598164	0.0745878	0.00119502	1.86201	0.0360137	0.181135	0.00196257	0.560192	0.0527516	0.000992645	1056.54	64.5201	64.7618	1073.17	23.2553	25.6414	1067.7	41.3014	42.6887	1039.06	39.1046	42.3087	101.574	12126.7	0.623286
91500 bottom left	2012	AP26B039	ok	-0.00218847	21015.3	95.0345	0.3657	5.4515	0.0560574	0.0738033	0.0010528	1.86583	0.0328104	0.183436	0.00188626	0.584759	0.0529774	0.00090103	1035.21	57.6309	57.8907	1085.72	22.3287	24.8594	1069.05	37.5984	39.121	1043.39	35.4916	39.0217	104.879	16246.3	2.22148
91500 bottom left	2012	AP26B040	ok	-0.00276546	22276.6	98.142	0.373483	5.41039	0.056263	0.0736044	0.000953576	1.87494	0.0311479	0.18483	0.00192206	0.625969	0.05274	0.00084806	1029.76	52.3833	52.666	1093.31	22.7387	25.2615	1072.28	35.6269	37.2397	1038.83	33.4089	37.1066	106.171	15876.1	2.4687
91500 bottom left	2012	AP26B041	ok	0.00135194	17264.7	75.7662	0.361072	5.39437	0.0560906	0.0771792	0.00122064	1.97184	0.0373221	0.185378	0.00192756	0.549357	0.0533331	0.000931603	1124.96	63.0446	63.325	1096.29	22.7984	25.3283	1105.94	41.8653	43.3326	1050.22	36.6896	40.1574	97.4517	15517.6	2.45303
91500 bottom left	2012	AP26B042	ok	-5.1378e-05	20119.4	86.4179	0.367856	5.39684	0.0565305	0.0759819	0.00112717	1.94036	0.0352372	0.185294	0.00194091	0.5768	0.052918	0.000901069	1093.72	59.4091	59.6903	1095.83	22.9571	25.4692	1095.12	39.7751	41.2873	1042.25	35.4942	39.0166	100.193	15170.8	2.48012
91500 bottom left	2012	AP26B043	ok	-0.00264865	17326.6	75.3953	0.28759	5.45704	0.0605534	0.0733784	0.00120254	1.8532	0.0366778	0.18325	0.00203341	0.560663	0.0517168	0.000996904	1023.54	66.326	66.5467	1084.7	24.0725	26.4326	1064.57	42.139	43.4917	1019.18	39.2918	42.3653	105.975	14835.6	2.52352
91500 bottom left	2012	AP26B044	ok	-0.004181	17625.4	75.4699	0.361843	5.40029	0.0565953	0.0724854	0.00102848	1.84989	0.0326312	0.185175	0.00194064	0.594121	0.0533617	0.00099792	998.716	57.6416	57.8834	1095.18	22.9552	25.4646	1063.39	37.5155	39.0255	1050.77	39.3009	42.5597	109.659	14512.1	2.55439
91500 bottom left	2012	AP26B045	ok	-0.00276565	18210.4	78.6844	0.364183	5.36412	0.0596155	0.0739327	0.00106968	1.89955	0.0346556	0.186424	0.00207187	0.609168	0.0530341	0.000914872	1038.75	58.4213	58.6793	1101.97	24.4941	26.8883	1080.93	39.4413	40.9272	1044.48	36.0359	39.5243	106.086	14200.3	2.63984
91500 bottom Right	2012	AP26B022	ok	0.000863914	16190.7	94.3923	0.360118	5.59853	0.0611545	0.0753834	0.00122857	1.85573	0.0364087	0.178618	0.0019511	0.556754	0.0519958	0.000930429	1077.87	65.422	65.6701	1059.42	23.1448	25.483	1065.47	41.8082	43.1736	1024.54	36.6669	39.976	98.2886	24327.9	0.129079
91500 bottom Right	2012	AP26B023	ok	0.00758351	14799.3	83.9414	0.346356	5.61044	0.0699857	0.080944	0.00173321	1.98838	0.0492742	0.178239	0.00222339	0.503377	0.0604456	0.00133013	1219.23	84.1888	84.4356	1057.35	26.3791	28.445	1111.57	55.0918	56.2263	1186.24	52.2072	55.3677	86.7227	23759	0.085388
91500 bottom Right	2012	AP26B024	ok	0.00045657	14607.2	85.7197	0.350277	5.52995	0.0600906	0.0754926	0.0010737	1.88146	0.0336754	0.180833	0.001965	0.607109	0.0566735	0.00103413	1080.77	57.0674	57.3533	1071.53	23.2872	25.6634	1074.58	38.4668	39.9714	1114.21	40.6627	44.1974	99.1443	23201.9	0.0884531
91500 bottom Right	2012	AP26B025	ok	0.00105004	17934.3	107.225	0.361674	5.5995	0.0604037	0.0755333	0.00112606	1.85909	0.0342103	0.178587	0.00192648	0.586218	0.0514938	0.000841814	1081.85	59.8087	60.082	1059.25	22.853	25.2176	1066.67	39.2567	40.7109	1014.89	33.1827	36.7417	97.9108	22656.4	0.0896874
91500 bottom Right	2012	AP26B026	ok	0.00224621	14112.3	86.0106	0.359469	5.67776	0.0613218	0.0760378	0.00120236	1.84572	0.0353439	0.176126	0.00190222	0.564013	0.0515453	0.00100525	1095.2	63.3117	63.5764	1045.78	22.5895	24.9214	1061.9	40.669	42.0622	1015.88	39.6242	42.6547	95.4875	22122.5	0.0392325
91500 bottom Right	2012	AP26B027	ok	-0.000581982	14834.3	90.3768	0.362817	5.61102	0.0603411	0.0740897	0.00119015	1.81982	0.0351789	0.178221	0.00191659	0.55631	0.0523719	0.000998296	1043.03	64.8207	65.0552	1057.25	22.7394	25.1061	1052.62	40.6964	42.0648	1031.77	39.3343	42.4782	101.363	21600.4	0.0447382
91500 top center	2012	AP26B029	ok	0.00138977	12930.8	78.5077	0.356071	5.65692	0.0652574	0.0754509	0.00129156	1.83822	0.0379448	0.176775	0.00203925	0.558849	0.0516129	0.00106344	1079.66	68.6966	68.9337	1049.33	24.2099	26.4133	1059.22	43.7294	45.0215	1017.18	41.9164	44.7993	97.1904	20591.2	0.0517697
91500 top center	2012	AP26B030	ok	0.00198324	12277	79.0932	0.356993	5.73943	0.0831635	0.075436	0.00171755	1.81143	0.048887	0.174233	0.00252462	0.5369	0.0512136	0.00122326	1079.27	91.3778	91.5561	1035.39	30.0054	31.7636	1049.6	56.653	57.6382	1009.51	48.225	50.7137	95.9349	20104.1	0.129263
91500 top center	2012	AP26B031	ok	0.00137657	13110.3	79.0763	0.355139	5.59063	0.0638006	0.0758649	0.0013026	1.87022	0.0385577	0.178871	0.00204129	0.553536	0.0518875	0.00104596	1090.64	68.7931	69.0347	1060.8	24.2119	26.4616	1070.61	44.1447	45.4523	1022.46	41.2219	44.1796	97.2646	19628.7	0.168555
91500 top center	2012	AP26B032	ok	0.000630543	12929.6	79.3297	0.356359	5.56349	0.0613188	0.0754163	0.00126196	1.86823	0.0374335	0.179743	0.00198106	0.550066	0.0541664	0.00107972	1078.75	67.162	67.4041	1065.57	23.4887	25.8214	1069.9	42.8751	44.2185	1066.2	42.5062	45.6228	98.7788	19165	0.0692911
91500 top center	2012	AP26B033	ok	0.00357683	12929.6	80.7799	0.358635	5.60275	0.0669503	0.0776323	0.0013508	1.90965	0.0403091	0.178484	0.0021328	0.566112	0.0517788	0.00101851	1136.61	69.2413	69.502	1058.69	25.3017	27.4539	1084.46	45.7819	47.0764	1020.37	40.1422	43.1619	93.1439	18713	0.0397118
91500 top center	2012	AP26B034	ok	0.00196666	12940.6	82.1231	0.356398	5.66235	0.0667906	0.0759003	0.00135794	1.84739	0.0395888	0.176605	0.00208315	0.550434	0.0512874	0.00101136	1091.57	71.6719	71.9043	1048.4	24.7329	26.8899	1062.5	45.5378	46.7876	1010.92	39.8699	42.8547	96.0452	18272.7	0.0396377
91500 top center	2012	AP26B035	ok	9.33544e-05	13126.9	84.463	0.368792	5.59215	0.0656305	0.0747782	0.00123902	1.84293	0.03742	0.178822	0.00209869	0.578006	0.0545564	0.00112637	1061.67	66.674	66.9102	1060.54	24.8933	27.0854	1060.91	43.0827	44.3977	1073.68	44.3342	47.3714	99.8931	17844.1	0.0702497
91500 top left	2012	AP26B012	ok	0.000712494	13607	72.0751	0.354655	5.50332	0.0631335	0.0758865	0.00118572	1.90043	0.0368382	0.181709	0.00208454	0.59182	0.0526094	0.00101815	1091.21	62.5972	62.8629	1076.3	24.6945	26.9661	1081.24	41.9178	43.3196	1036.33	40.1121	43.2258	98.6342	30659.4	0.44276
91500 top left	2012	AP26B013	ok	0.00103998	13723	73.5598	0.356895	5.56348	0.0629147	0.0757601	0.00129433	1.87675	0.0384511	0.179744	0.00203263	0.551954	0.0535982	0.000971488	1087.87	68.4787	68.7202	1065.57	24.1001	26.3788	1072.92	43.9641	45.2825	1055.3	38.2556	41.6241	97.9509	29973.6	0.3853
91500 top left	2012	AP26B014	ok	0.00133387	13833.1	74.382	0.355119	5.55088	0.0617541	0.07609	0.00118324	1.8892	0.0361221	0.180152	0.0020042	0.581847	0.0541147	0.00100212	1096.57	62.2493	62.5191	1067.8	23.7588	26.0766	1077.3	41.1966	42.612	1065.21	39.4519	42.7856	97.3768	29299.6	0.399249
91500 top left	2012	AP26B015	ok	-0.00114058	14039	74.6782	0.353545	5.53636	0.0660006	0.0741089	0.00131955	1.84484	0.0395309	0.180624	0.00215327	0.556346	0.0546639	0.00109094	1043.56	71.8441	72.056	1070.38	25.5207	27.7015	1061.59	45.4951	46.7439	1075.74	42.9376	46.0786	102.571	28637.2	0.404473
91500 top left	2012	AP26B016	ok	-0.00238578	14585.1	76.5653	0.353233	5.55493	0.0618789	0.0729408	0.00120552	1.80969	0.0360689	0.18002	0.00200533	0.558903	0.0533645	0.00101358	1011.43	67.0122	67.2255	1067.09	23.7735	26.087	1048.97	41.8138	43.1377	1050.82	39.9176	43.1301	105.503	27986.6	0.528286
91500 top left	2012	AP26B017	ok	0.0015922	14691.5	76.623	0.359346	5.49976	0.0616086	0.0766494	0.00120048	1.92078	0.036986	0.181826	0.00203683	0.581752	0.053371	0.000952495	1111.21	62.5591	62.8348	1076.94	24.1279	26.4509	1088.34	41.9135	43.3336	1050.95	37.5117	40.9144	96.9159	27347.6	0.58916
91500 top left	2012	AP26B018	ok	-0.0013987	13134.8	68.4288	0.330063	5.53093	0.064431	0.0739284	0.00130848	1.84215	0.0390331	0.180801	0.0021062	0.54978	0.0545539	0.00106386	1038.63	71.4685	71.6795	1071.35	24.9608	27.1904	1060.63	44.9471	46.2084	1073.63	41.8738	45.0768	103.15	26720.3	0.540545
91500 top right	2012	AP26B004	ok	-0.00142613	14233.5	78.4765	0.36517	5.57386	0.0662394	0.0736222	0.00133328	1.82039	0.0394312	0.179409	0.00213208	0.548635	0.0524691	0.000993724	1030.25	73.2191	73.4217	1063.74	25.2829	27.4564	1052.83	45.6102	46.8357	1033.63	39.1523	42.3207	103.251	36565.9	0.144284
91500 top right	2012	AP26B005	ok	0.00054599	15166.1	82.4053	0.37036	5.60304	0.0615859	0.0750875	0.00116035	1.84695	0.0350248	0.178474	0.0019617	0.579612	0.0513465	0.000912409	1069.97	62.106	62.3635	1058.64	23.272	25.5953	1062.34	40.2916	41.6985	1012.06	35.9679	39.2577	98.9407	35786.7	0.128476
91500 top right	2012	AP26B006	ok	0.000360644	14819.6	81.2746	0.369249	5.55256	0.0582699	0.0752619	0.00104854	1.86808	0.0325832	0.180097	0.00188998	0.601661	0.053891	0.000977843	1074.63	55.9528	56.241	1067.51	22.4053	24.8484	1069.85	37.3209	38.8566	1060.92	38.5004	41.8836	99.337	35019.2	0.124808
91500 top right	2012	AP26B007	ok	0.000555565	14291.7	79.5231	0.361674	5.65095	0.0604488	0.0747891	0.00125639	1.82402	0.0363268	0.176962	0.00189298	0.537117	0.0526595	0.000986137	1061.96	67.5961	67.8292	1050.35	22.4715	24.8341	1054.13	41.9877	43.3191	1037.29	38.8499	42.0629	98.9068	34263.3	0.0982928
91500 top right	2012	AP26B008	ok	0.00129091	13859.5	77.4787	0.358041	5.63203	0.0629681	0.0755261	0.00136556	1.84818	0.0392889	0.177556	0.00198514	0.525933	0.0523022	0.00108233	1081.66	72.5383	72.7637	1053.61	23.5594	25.8361	1062.78	45.1856	46.4455	1030.43	42.6468	45.5554	97.4063	33519.2	0.0917916
91500 top right	2012	AP26B009	ok	0.00319236	12207.7	68.5884	0.327159	5.62597	0.065404	0.0771599	0.00131575	1.8902	0.0390099	0.177747	0.00206638	0.5633	0.0505659	0.00104595	1124.46	67.979	68.2388	1054.66	24.5216	26.7206	1077.65	44.4811	45.796	997.049	41.2478	44.0633	93.7924	32786.7	0.111938
91500 top right	2012	AP26B010	ok	-0.000912389	14175.2	80.149	0.35653	5.53484	0.060151	0.0743107	0.00119077	1.85037	0.0358266	0.180674	0.00196351	0.561296	0.0528175	0.00102063	1049.04	64.6031	64.8411	1070.65	23.2711	25.6451	1063.56	41.185	42.5655	1040.32	40.2056	43.3357	102.06	32065.9	0.0718335
Well degassed sample mounts:
91500 - Primary - Centre	2012	MY02A001	ok		13356.7	88.211	0.360563	5.61234	0.0588	0.0761916	0.00138629	1.87101	0.0392829	0.178179	0.00186676	0.499004	0.0547394	0.00111995	1099.24	72.8055	73.0375	1057.02	22.1485	24.5712	1070.89	44.9679	46.2528	1077.18	44.0776	47.1507	96.159	28734.1	0.0156208
91500 - Primary - Centre	2012	MY02A002	ok		13311.3	88.2075	0.365321	5.58104	0.0555651	0.0728407	0.00109638	1.79875	0.0324614	0.179178	0.00178391	0.551686	0.0525765	0.00102089	1008.64	61.0551	61.2879	1062.48	21.1563	23.7054	1045.01	37.7176	39.1693	1035.69	40.2206	43.3228	105.338	28212.7	-0.00116405
91500 - Primary - Centre	2012	MY02A004	ok		12838.5	89.6216	0.357718	5.65711	0.059148	0.0775775	0.00130804	1.88996	0.0374962	0.176769	0.00184821	0.527001	0.0534149	0.00104738	1135.21	67.1103	67.3786	1049.3	21.9419	24.3513	1077.57	42.7572	44.1232	1051.79	41.2477	44.3696	92.4321	27621.5	-0.0192957
91500 - Primary - Centre	2012	MY02A012	ok		13167.6	88.4167	0.363395	5.56016	0.06038	0.0758911	0.00130309	1.88112	0.0382174	0.179851	0.00195307	0.534516	0.0545832	0.00108095	1091.33	68.7878	69.0298	1066.16	23.1557	25.5214	1074.46	43.658	44.9891	1074.19	42.5458	45.7049	97.6939	27580.4	-0.0146589
91500 - Primary - Centre	2012	MY02A020	ok		9492.69	63.7224	0.321843	5.61302	0.0655926	0.0737283	0.00145153	1.8103	0.0414458	0.178157	0.00208191	0.51042	0.0537254	0.00116362	1033.16	79.5627	79.7503	1056.9	24.7014	26.8946	1049.19	48.0411	49.1981	1057.74	45.8188	48.6794	102.298	28084.3	0.0028244
91500 - Primary - Centre	2012	MY02A022	ok		12693.7	85.7452	0.351987	5.58636	0.0611933	0.0737544	0.00133339	1.81958	0.0384632	0.179007	0.00196086	0.518205	0.0534256	0.00108478	1033.88	73.0536	73.2582	1061.55	23.2566	25.5935	1052.53	44.4979	45.7526	1051.99	42.7203	45.7429	102.677	27916.8	-0.00406781
91500 - Primary - Centre	2012	MY02A030	ok		14523.9	95.5415	0.371475	5.53405	0.0563861	0.0747622	0.00130716	1.86188	0.0376778	0.1807	0.00184114	0.503494	0.0533024	0.00101606	1061.24	70.3606	70.5844	1070.8	21.8205	24.337	1067.65	43.2111	44.5388	1049.63	40.0166	43.2148	100.9	29086.1	0.0317468
91500 - Primary - Centre	2012	MY02A038	ok		12155.5	80.0715	0.357451	5.60549	0.0571045	0.0747476	0.00135981	1.83779	0.0383182	0.178396	0.00181737	0.488593	0.0540891	0.00107497	1060.85	73.2131	73.428	1058.21	21.5604	24.0478	1059.07	44.1636	45.443	1064.72	42.3206	45.4416	99.7514	29781.5	0.0488045
91500 - Primary - Centre	2012	MY02A040	ok		11918.4	79.3353	0.360741	5.61421	0.061269	0.0734257	0.00152361	1.80248	0.0422594	0.178119	0.00194385	0.465479	0.054135	0.00109716	1024.85	83.9633	84.1382	1056.69	23.0638	25.3979	1046.36	49.064	50.1914	1065.6	43.1934	46.2604	103.107	27739.5	-0.0248448
91500 - Primary - Centre	2012	MY02A048	ok		11766.9	75.9059	0.363572	5.5474	0.0657101	0.0734603	0.00134801	1.82505	0.0398613	0.180265	0.00213527	0.542334	0.0541491	0.00111903	1025.8	74.2407	74.4389	1068.42	25.3113	27.501	1054.5	46.0632	47.2808	1065.87	44.0538	47.0663	104.155	27851.4	-0.0267152
91500 - Primary - Centre	2012	MY02A056	ok		14189.7	91.9778	0.368867	5.59124	0.0584167	0.076719	0.00124784	1.89107	0.0365574	0.178851	0.00186862	0.540457	0.0529313	0.00103074	1113.03	64.9507	65.2171	1060.7	22.1641	24.6013	1077.96	41.6773	43.0785	1042.51	40.602	43.7162	95.2983	29286.3	0.0209449
91500 - Primary - Centre	2012	MY02A057	common Pb, do not use 7/6 or Pb/Th age		15432	97.9421	0.367247	5.53209	0.0539272	0.0928214	0.00152281	2.31244	0.0441293	0.180764	0.0017621	0.510815	0.0761766	0.00156516	1483.42	62.1748	62.6683	1071.15	20.8832	23.5019	1216.11	46.415	48.0158	1483.87	60.9768	65.1934	72.2077	28143.2	-0.0188535
91500 - Primary - Centre	2012	MY02A065	ok		11622.4	75.9325	0.365117	5.5271	0.0604684	0.0737456	0.0014127	1.83887	0.0405662	0.180927	0.0019794	0.495928	0.0531782	0.00106746	1033.64	77.4108	77.6038	1072.04	23.4569	25.8196	1059.46	46.744	47.9555	1047.24	42.0434	45.0847	103.715	27936.8	-0.0219622
91500 - Primary - Centre	2012	MY02A073	ok		11937.6	77.0426	0.367344	5.59315	0.0559662	0.0760907	0.0014104	1.87494	0.039494	0.17879	0.00178901	0.475035	0.0541122	0.00108711	1096.59	74.199	74.4255	1060.36	21.2204	23.7531	1072.28	45.1732	46.4557	1065.16	42.7982	45.8891	96.6965	29908.2	0.0602801
91500 - Primary - Centre	2012	MY02A074	ok		11468.3	75.6715	0.366694	5.598	0.0574948	0.0722627	0.00113718	1.77907	0.0334318	0.178635	0.00183469	0.546549	0.0530413	0.0010514	992.464	63.9908	64.2059	1059.51	21.7637	24.2359	1037.84	39.0056	40.3922	1044.62	41.4134	44.4829	106.756	28240.5	0.00344726
91500 - Primary - Centre	2012	MY02A083	ok		14341.3	93.5069	0.354629	5.5678	0.0614175	0.0743821	0.00131359	1.84118	0.0383371	0.179604	0.00198118	0.529768	0.0534024	0.00100723	1050.98	71.1775	71.3944	1064.81	23.4915	25.8208	1060.28	44.1544	45.437	1051.55	39.6669	42.9025	101.316	27978.3	0.0236516
91500 - Primary - Centre	2012	MY02A091	ok		11676.5	76.8229	0.363529	5.56259	0.0585491	0.073981	0.00134664	1.83297	0.0385412	0.179772	0.0018922	0.50058	0.0545951	0.00111096	1040.07	73.4848	73.6906	1065.73	22.4347	24.8672	1057.34	44.4648	45.7317	1074.42	43.727	46.8077	102.467	26902.8	0.02649
91500 - Primary - Centre	2012	MY02A093	ok		14563.4	97.5986	0.362702	5.57404	0.0573831	0.0746607	0.00112505	1.84601	0.0336892	0.179403	0.0018469	0.564103	0.0534166	0.00101933	1058.51	60.6654	60.9234	1063.71	21.9012	24.3781	1062.01	38.7627	40.2222	1051.82	40.1431	43.3448	100.492	25398	-0.0178917
91500_bottomLeft	2012	MY02A023	ok		13122.7	88.3904	0.358334	5.63823	0.0577539	0.0739834	0.00132471	1.80844	0.0373053	0.17736	0.00181675	0.496559	0.0516194	0.00103109	1040.14	72.2852	72.4944	1052.54	21.5629	24.0247	1048.51	43.2584	44.5383	1017.31	40.641	43.6089	101.192	29566	0.0541855
91500_bottomLeft	2012	MY02A024	ok		12945.8	86.2034	0.355391	5.60831	0.0602854	0.0737561	0.00129198	1.8125	0.0372508	0.178307	0.00191667	0.523025	0.0525431	0.00105836	1033.92	70.7827	70.9938	1057.72	22.7395	25.1082	1049.98	43.1588	44.445	1035.05	41.6976	44.6938	102.301	28800.2	0.0262619
91500_bottomLeft	2012	MY02A025	ok		12701.6	87.0526	0.358327	5.64414	0.0612684	0.0736422	0.00130446	1.79821	0.037358	0.177175	0.00192328	0.522513	0.0525236	0.00102519	1030.8	71.6106	71.818	1051.52	22.8291	25.163	1044.81	43.412	44.6786	1034.68	40.391	43.4752	102.01	28216.8	0.00481208
91500_bottomLeft	2012	MY02A026	ok		12539.3	86.0236	0.357825	5.64994	0.0569799	0.0775379	0.00126631	1.8914	0.0363043	0.176993	0.00178498	0.525416	0.0509936	0.000987782	1134.19	65.0124	65.2888	1050.53	21.1892	23.6809	1078.07	41.3859	42.7971	1005.28	38.9458	41.9636	92.6234	26423.1	-0.059725
91500_bottomLeft	2012	MY02A027	ok		12664.9	85.9546	0.35602	5.62737	0.0606967	0.0742281	0.00135836	1.81792	0.0386163	0.177703	0.0019167	0.507767	0.0534814	0.00106619	1046.8	73.8027	74.0103	1054.41	22.7458	25.0998	1051.94	44.6904	45.9384	1053.06	41.9872	45.0651	100.727	25432.6	-0.0956458
91500_bottomLeft	2012	MY02A028	ok		13409.9	88.9979	0.366122	5.5821	0.0576949	0.0746211	0.0013682	1.84237	0.0387776	0.179144	0.00185158	0.49106	0.0537119	0.00103942	1057.44	73.8272	74.0389	1062.3	21.9591	24.4238	1060.71	44.651	45.9206	1057.48	40.9283	44.1057	100.46	26172	-0.0700785
91500_bottomLeft	2012	MY02A029	ok		12698.2	84.0963	0.359919	5.56271	0.0621744	0.0743351	0.00124348	1.8417	0.0370522	0.179768	0.00200927	0.55556	0.0532638	0.00105587	1049.7	67.4341	67.6624	1065.71	23.8229	26.1263	1060.47	42.67	43.9963	1048.89	41.5852	44.6671	101.525	26959.1	-0.0428957
91500_BottomRIght	2012	MY02A066	ok		12602.9	82.2674	0.327214	5.52014	0.0566496	0.0751176	0.00138585	1.87544	0.0395929	0.181155	0.00185907	0.486108	0.0544522	0.00112743	1070.77	74.1372	74.3533	1073.28	22.0287	24.5349	1072.45	45.2817	46.5616	1071.68	44.3783	47.4018	100.234	31626.3	0.108376
91500_BottomRIght	2012	MY02A067	ok		12880	83.415	0.331808	5.52731	0.0606424	0.0741229	0.00129299	1.84821	0.0380866	0.18092	0.00198495	0.532405	0.0544378	0.00104403	1043.94	70.3809	70.5973	1072	23.5227	25.8792	1062.79	43.8025	45.1011	1071.4	41.0956	44.3419	102.688	31387.5	0.101326
91500_BottomRIght	2012	MY02A068	ok		11123.8	72.8179	0.329255	5.55171	0.0616769	0.0746014	0.00131746	1.85197	0.038639	0.180125	0.0020011	0.532481	0.0542874	0.00120589	1056.91	71.1138	71.3334	1067.66	23.7224	26.0428	1064.13	44.4035	45.6882	1068.52	47.4703	50.292	101.017	30727.4	0.0796063
91500_BottomRIght	2012	MY02A069	ok		11704	78.0664	0.331357	5.54184	0.0571114	0.0730749	0.00159478	1.8173	0.04386	0.180446	0.00185958	0.426999	0.0538235	0.00127492	1015.15	88.4374	88.6004	1069.41	22.0416	24.5293	1051.71	50.7656	51.8671	1059.63	50.199	52.8321	105.345	29625.3	0.0424256
91500_BottomRIght	2012	MY02A070	ok		11090.2	74.6676	0.340284	5.53549	0.0618509	0.0726777	0.00136681	1.8095	0.0395833	0.180652	0.00201852	0.510782	0.0541001	0.00119279	1004.1	76.3378	76.5225	1070.54	23.9234	26.2379	1048.9	45.8898	47.0991	1064.93	46.9586	49.7908	106.617	29009.4	0.0224203
91500_BottomRIght	2012	MY02A071	ok		10916.2	73.201	0.331977	5.66678	0.0592817	0.0778254	0.00139083	1.89277	0.0391952	0.176467	0.00184607	0.505184	0.0514254	0.00118324	1141.55	71.0643	71.3206	1047.65	21.9194	24.3238	1078.55	44.6691	45.9807	1013.58	46.6427	49.2317	91.7736	28575.9	0.00894516
91500_BottomRIght	2012	MY02A072	ok		11406.4	74.9913	0.348274	5.5808	0.0634852	0.0756302	0.0014382	1.86772	0.0413869	0.179186	0.00203835	0.513363	0.0544402	0.00114274	1084.43	76.2605	76.4761	1062.53	24.1738	26.4337	1069.72	47.4081	48.626	1071.45	44.9812	47.9654	97.9803	29872.8	0.0567912
91500_LeftMiddle	2012	MY02A013	ok		13174.5	87.2031	0.359529	5.50586	0.0570881	0.0747374	0.00126829	1.87079	0.0372041	0.181625	0.00188319	0.521379	0.0533652	0.00104702	1060.57	68.2977	68.5279	1075.84	22.31	24.799	1070.81	42.5901	43.9444	1050.83	41.2346	44.352	101.44	31066	0.110155
91500_LeftMiddle	2012	MY02A014	ok		12989.1	86.9092	0.359516	5.55598	0.0561448	0.0718966	0.00121451	1.78345	0.0351059	0.179986	0.00181882	0.513369	0.0532892	0.00100615	982.129	68.7989	68.9949	1066.9	21.5627	24.0886	1039.44	40.9211	42.2489	1049.38	39.6262	42.8521	108.631	29566.4	0.0567303
91500_LeftMiddle	2012	MY02A015	ok		12993.1	86.4554	0.359916	5.57051	0.0551667	0.0736124	0.00126305	1.82124	0.0360808	0.179517	0.00177781	0.49989	0.0516236	0.0010065	1029.98	69.3741	69.5879	1064.33	21.0809	23.6466	1053.13	41.7273	43.0643	1017.39	39.6716	42.7074	103.335	29643	0.0595301
91500_LeftMiddle	2012	MY02A016	ok		13170	87.9772	0.358993	5.56694	0.0570981	0.0770731	0.00115173	1.90809	0.0345834	0.179632	0.00184242	0.565894	0.0548325	0.00112116	1122.21	59.5919	59.887	1064.96	21.8459	24.3339	1083.92	39.2913	40.7908	1078.97	44.1234	47.2033	94.8984	29949.4	0.070449
91500_LeftMiddle	2012	MY02A017	ok		11648.6	78.6335	0.351696	5.56662	0.0595448	0.0744905	0.00134478	1.84426	0.0387001	0.179642	0.00192159	0.509757	0.0540218	0.00119693	1053.91	72.7293	72.9428	1065.02	22.7846	25.1802	1061.38	44.5443	45.8185	1063.43	47.1237	49.9388	101.054	29136.1	0.0412547
91500_LeftMiddle	2012	MY02A018	ok		12572	87.0139	0.360538	5.5923	0.0544773	0.0726049	0.00133792	1.78932	0.0372964	0.178817	0.00174195	0.467354	0.0533103	0.00100571	1002.06	74.8228	75.0104	1060.51	20.6619	23.2562	1041.58	43.4211	44.6797	1049.78	39.6086	42.8382	105.833	27250.4	-0.0263328
91500_LeftMiddle	2012	MY02A019	ok		13313.9	90.0299	0.368937	5.53541	0.0545526	0.0750966	0.00136378	1.86975	0.0386328	0.180655	0.00178039	0.476971	0.0539869	0.00107503	1070.21	72.9828	73.2021	1070.55	21.101	23.693	1070.44	44.235	45.5396	1062.76	42.3252	45.4347	100.032	26119	-0.0670201
91500_Rightmiddle	2012	MY02A058	ok		15595.8	100.618	0.364665	5.49709	0.0551691	0.0742019	0.0010619	1.86035	0.0325176	0.181914	0.0018257	0.574169	0.0534486	0.000947101	1046.09	57.7218	57.9866	1077.42	21.6262	24.1928	1067.11	37.3047	38.8333	1052.43	37.2979	40.7278	102.996	29993.5	0.04581
91500_Rightmiddle	2012	MY02A059	ok		16317.8	107.005	0.36663	5.61311	0.0565832	0.0760022	0.00128489	1.8661	0.0367308	0.178154	0.00179589	0.512139	0.0531297	0.000950858	1094.26	67.6983	67.9455	1056.88	21.3079	23.8156	1069.15	42.0886	43.4543	1046.31	37.4516	40.8306	96.5845	29280.6	0.0212024
91500_Rightmiddle	2012	MY02A060	ok		11320.7	76.6404	0.357147	5.56409	0.0621749	0.0746094	0.00146456	1.84804	0.0417424	0.179724	0.00200829	0.494715	0.0522411	0.00111059	1057.12	79.0431	79.2408	1065.47	23.8117	26.1151	1062.73	48.0087	49.1962	1029.25	43.7618	46.5945	100.789	27934	-0.0254231
91500_Rightmiddle	2012	MY02A061	ok		11456.9	76.8134	0.351606	5.59433	0.061418	0.0751052	0.00149533	1.85027	0.042068	0.178753	0.00196246	0.482871	0.0525255	0.00106285	1070.44	80.0111	80.2114	1060.16	23.2781	25.6072	1063.53	48.3609	49.5418	1034.71	41.8747	44.8572	99.0388	26393.2	-0.0787603
91500_Rightmiddle	2012	MY02A062	ok		11935.5	78.703	0.353435	5.56026	0.0637649	0.0729626	0.00142137	1.8085	0.0408822	0.179848	0.00206249	0.507305	0.0546924	0.00103928	1012.03	78.9799	79.1612	1066.14	24.453	26.7039	1048.53	47.4056	48.5764	1076.28	40.9038	44.1928	105.347	26074.5	-0.0893681
91500_Rightmiddle	2012	MY02A063	ok		12781	84.9879	0.363154	5.60952	0.0623414	0.0756275	0.00129262	1.85809	0.0378815	0.178268	0.00198119	0.545117	0.0515244	0.00102339	1084.35	68.5443	68.784	1057.51	23.5052	25.8028	1066.31	43.4784	44.7949	1015.48	40.3395	43.3178	97.5242	27421.3	-0.0416752
91500_Rightmiddle	2012	MY02A064	ok		12887.1	85.4021	0.36422	5.60502	0.0615476	0.0756428	0.00122569	1.85996	0.0364065	0.178412	0.0019591	0.560994	0.0531772	0.00102613	1084.76	64.9777	65.2307	1058.29	23.2418	25.5664	1066.97	41.7694	43.1398	1047.23	40.4154	43.5704	97.5599	27205.1	-0.0484655
91500_Topcenter	2012	MY02A031	ok		12539.3	82.3199	0.359728	5.56315	0.0599211	0.0785982	0.00135336	1.94717	0.0395473	0.179754	0.00193615	0.53033	0.053276	0.00106793	1161.17	68.2735	68.5494	1065.63	22.956	25.3381	1097.47	44.5796	45.9396	1049.12	42.0598	45.1105	91.7721	28781.1	0.0200428
91500_Topcenter	2012	MY02A032	ok		12244.8	81.4984	0.362973	5.58975	0.0579817	0.0737658	0.00126111	1.81876	0.0363693	0.178899	0.00185569	0.518726	0.0528499	0.00109047	1034.19	69.0793	69.2957	1060.96	22.0103	24.4639	1052.24	42.0828	43.4065	1040.94	42.9561	45.9024	102.588	28918	0.0239883
91500_Topcenter	2012	MY02A033	ok		12136.5	79.1704	0.363042	5.57646	0.066954	0.0744166	0.00165898	1.83918	0.0465693	0.179325	0.00215307	0.474178	0.054812	0.00124728	1051.91	89.8382	90.0105	1063.29	25.5328	27.685	1059.57	53.658	54.7168	1078.58	49.0873	51.8714	101.081	28393.5	0.00451077
91500_Topcenter	2012	MY02A034	ok		11736.7	78.2071	0.359758	5.58304	0.0619475	0.0748937	0.0014444	1.84879	0.0411355	0.179114	0.00198739	0.49868	0.0543259	0.00109508	1064.77	77.5701	77.7744	1062.13	23.5701	25.8811	1063	47.3035	48.5089	1069.26	43.1075	46.2006	99.7518	28650	0.012659
91500_Topcenter	2012	MY02A035	ok		11399.5	76.8401	0.358382	5.56812	0.0599455	0.0742	0.00148106	1.83657	0.0416508	0.179594	0.00193348	0.474714	0.0534708	0.00104055	1046.03	80.5086	80.6987	1064.76	22.926	25.3071	1058.63	48.0166	49.195	1052.86	40.9777	44.1249	101.79	26758.4	-0.0550673
91500_Topcenter	2012	MY02A036	ok		10997.3	72.6047	0.356812	5.56386	0.0623141	0.0744127	0.00134421	1.84325	0.0391772	0.179731	0.00201295	0.526939	0.053605	0.00117071	1051.81	72.7976	73.01	1065.51	23.8669	26.1657	1061.02	45.1028	46.3609	1055.43	46.1006	48.9327	101.303	28464.3	0.00424864
91500_Topcenter	2012	MY02A037	ok		13163.3	85.8939	0.356715	5.59823	0.0701227	0.0757887	0.00150779	1.8658	0.0438639	0.178628	0.00223747	0.532802	0.0537822	0.00122802	1088.62	79.733	79.9408	1059.47	26.5416	28.6037	1069.04	50.2652	51.414	1058.83	48.3532	51.0775	97.3223	30818.7	0.0863201
91500_TopLeft	2012	MY02A049	ok		13097.5	85.3907	0.353782	5.55098	0.0574729	0.0733678	0.00130566	1.82158	0.037504	0.180148	0.00186519	0.502878	0.0544205	0.00110895	1023.25	72.0268	72.23	1067.78	22.1109	24.5845	1053.25	43.3704	44.6584	1071.07	43.6515	46.7186	104.353	29074	0.0154573
91500_TopLeft	2012	MY02A050	ok		12259.5	82.3164	0.349611	5.70148	0.0618029	0.0758509	0.00131166	1.83352	0.0374206	0.175393	0.00190122	0.531124	0.0543002	0.00116323	1090.27	69.2877	69.5274	1041.76	22.5849	24.9002	1057.54	43.1671	44.4714	1068.77	45.7905	48.711	95.5507	28081.2	-0.0196879
91500_TopLeft	2012	MY02A051	ok		12618.7	84.54	0.354616	5.59859	0.0604362	0.073266	0.00129969	1.80358	0.0374527	0.178616	0.00192814	0.519841	0.0522704	0.0010506	1020.44	71.8281	72.0308	1059.41	22.8724	25.2359	1046.76	43.4733	44.7428	1029.82	41.3973	44.3844	103.819	27647.4	-0.0352372
91500_TopLeft	2012	MY02A052	ok		12501.8	83.9873	0.354413	5.5802	0.0618524	0.073993	0.00142528	1.82748	0.0406136	0.179205	0.00198636	0.498757	0.0514501	0.00105585	1040.4	77.7593	77.9539	1062.63	23.5569	25.8712	1055.38	46.9089	48.107	1014.05	41.6203	44.5051	102.137	26269.2	-0.0836496
91500_TopLeft	2012	MY02A053	ok		12002.4	80.8457	0.343898	5.61474	0.0606043	0.0750803	0.00140913	1.84293	0.0399008	0.178103	0.0019224	0.498542	0.0527283	0.00115455	1069.78	75.431	75.6431	1056.6	22.8095	25.1668	1060.91	45.9388	47.1743	1038.61	45.4832	48.2634	98.7683	25889.3	-0.0971557
91500_TopLeft	2012	MY02A054	ok		13412.9	88.578	0.366301	5.65373	0.0572378	0.0738681	0.00129702	1.80067	0.0364963	0.176874	0.00179066	0.499498	0.0536811	0.00102249	1036.99	70.9183	71.1302	1049.88	21.2577	23.7393	1045.7	42.3889	43.6874	1056.89	40.2624	43.485	101.243	26549.2	-0.0743288
91500_TopLeft	2012	MY02A055	ok		13037.8	86.7918	0.360594	5.62754	0.0612796	0.074523	0.00139155	1.82509	0.0394509	0.177697	0.00193499	0.50376	0.0532593	0.00107861	1054.79	75.2162	75.4229	1054.38	22.9629	25.2966	1054.52	45.5886	46.8186	1048.8	42.4807	45.5014	99.9614	27456.8	-0.0428003
91500_TopRight	2012	MY02A005	ok		14544.5	97.7636	0.35796	5.56501	0.0617438	0.0743087	0.00120933	1.84029	0.0362473	0.179694	0.0019937	0.563296	0.0515004	0.00100641	1048.98	65.6125	65.8469	1065.3	23.6391	25.9571	1059.96	41.7553	43.1084	1015.02	39.6706	42.6929	101.556	27833.8	-0.0105553
91500_TopRight	2012	MY02A006	ok		14008.3	94.8684	0.353968	5.56792	0.0566636	0.0743976	0.00113849	1.84153	0.0338433	0.1796	0.00182776	0.553755	0.0527133	0.000997281	1051.4	61.6731	61.9235	1064.79	21.6724	24.1774	1060.41	38.9759	40.4234	1038.32	39.2879	42.4738	101.274	26242.8	-0.0661008
91500_TopRight	2012	MY02A007	ok		13792.9	93.681	0.35515	5.56298	0.0593894	0.0730872	0.00121414	1.8107	0.0357556	0.17976	0.00191908	0.540634	0.0524098	0.000942726	1015.49	67.3145	67.5286	1065.66	22.7536	25.155	1049.33	41.4419	42.7782	1032.49	37.1441	40.463	104.941	26124.9	-0.0694076
91500_TopRight	2012	MY02A008	ok		13795.4	94.3679	0.353399	5.5709	0.0607257	0.0745918	0.00133887	1.84535	0.0387523	0.179504	0.00195669	0.519072	0.0537825	0.00102625	1056.65	72.282	72.4979	1064.27	23.2021	25.5554	1061.77	44.5944	45.8681	1058.84	40.4084	43.6317	100.721	26393.1	-0.0590762
91500_TopRight	2012	MY02A009	ok		10140.6	72.1438	0.350999	5.63415	0.063874	0.0774094	0.00150783	1.89355	0.0426762	0.177489	0.00201218	0.503022	0.0549173	0.00121108	1130.89	77.5785	77.8089	1053.24	23.8811	26.1283	1078.83	48.6286	49.8367	1080.59	47.6601	50.5333	93.1339	24996.7	-0.108233
91500_TopRight	2012	MY02A010	ok		10464	72.9708	0.349732	5.55171	0.059597	0.0730304	0.00131873	1.81296	0.0380852	0.180125	0.00193362	0.511011	0.0535997	0.0010783	1013.91	73.1874	73.3837	1067.66	22.9223	25.3162	1050.15	44.1213	45.3807	1055.33	42.4618	45.5203	105.3	24316.2	-0.132001
91500_TopRight	2012	MY02A011	ok		10368.7	72.1454	0.348487	5.66721	0.0641938	0.0762614	0.00152181	1.85459	0.0425552	0.176454	0.00199873	0.493649	0.0531541	0.00115877	1101.07	79.8278	80.0401	1047.57	23.7321	25.969	1065.06	48.8777	50.0497	1046.78	45.64	48.4536	95.1412	24796.3	-0.114445

## Sheet: Annealed zircons
Identifier	Year	File number	Comments	f206c	206Pb cps	Uppm1	Th/U	238U/206Pb	1s	207Pb/206Pb	1s	207Pb/235U	1s	206Pb/238U	1s	Rho	208Pb/232Th	1s	207Pb/206Pb	2	2ssys	206Pb/238U	2s	2ssys	207Pb/235U	2s	2ssys	208Pb/232Th	2s	2ssys	% conc4
	Analysed								abs		abs		abs		abs			abs		abs	abs		abs	abs		abs	abs		abs	abs
Annealed zircons:
91500_Annealed	2012	NO09A232	ok	0.00342801	10819.1	79.7856	0.346507	5.7134	0.0763387	0.0768066	0.00152907	1.85275	0.0444217	0.175027	0.0023386	0.557277	0.0527573	0.00119687	1115.3	79.461	79.6798	1039.75	27.7849	29.6904	1064.41	51.0408	52.1629	1039.17	47.1495	49.8396	93.2257			Systematic Errors:							91500 - errors from TIMS in Horstwood et al. 2016 and Wiedenbeck 1995 (208Pb/232Th age only). NIST610 errors for 7/6Pb ratios are from Baker et al. 2004. All 2 sigma
91500_Annealed	2012	NO09A251	ok	0.000476543	12410.3	89.4401	0.351905	5.72091	0.0619601	0.0742867	0.00123043	1.78961	0.0354162	0.174797	0.00189314	0.547272	0.0517701	0.00107162	1048.39	66.7743	67.0043	1038.49	22.4946	24.8045	1041.68	41.2296	42.5534	1020.2	42.2356	45.1146	99.0557			1) Uncertaintly in Primary Ref. Material.							76 error %	206/238 error %	207/235 error%	208/232 error %
91500_Annealed	2012	NO09A240	ok	0.00507005	9509.71	68.4499	0.346583	5.67341	0.0687416	0.0784328	0.00152605	1.90531	0.0436717	0.176261	0.00213565	0.528617	0.0511086	0.00107189	1156.99	77.1847	77.4271	1046.51	25.3601	27.4606	1082.95	49.6445	50.8374	1007.49	42.2598	45.0681	90.4512			2) Long Term variance in secondary stds.							0.00549535	0.04	0.06	0.26465
91500_Annealed	2012	NO09A231	ok	0.00342639	11358.5	81.7481	0.353218	5.67813	0.0703447	0.077025	0.00133904	1.86955	0.0399097	0.176114	0.00218183	0.580345	0.0511437	0.00101231	1120.97	69.3305	69.5837	1045.71	25.91	27.9662	1070.37	45.6988	46.9626	1008.16	39.9101	42.8764	93.2865			3)Decay constant errors							0.5	1	1	1.5
91500_Annealed	2012	NO09A252	ok	-0.000506425	12472.2	88.6931	0.353839	5.66502	0.0593033	0.0738098	0.0011667	1.79566	0.0340439	0.176522	0.00184789	0.552158	0.0526127	0.00103939	1035.39	63.8498	64.0844	1047.95	21.9405	24.3441	1043.88	39.5819	40.9647	1036.39	40.9488	44.0037	101.212			4) Model common Pb uncertainty							0.173046	0.107	0.136	0.31		Decay constant errors from Jaffey et al. 1971 and Amelin and Zaitsev 2002 (232Th)
91500_Annealed	2012	NO09A239	ok	0.00454469	10283.2	73.1108	0.352026	5.62877	0.0664466	0.0782763	0.00143303	1.91659	0.0417497	0.177659	0.00209723	0.541921	0.050864	0.00111439	1153.03	72.6671	72.9227	1054.17	24.8886	27.0559	1086.88	47.3517	48.61	1002.78	43.9406	46.6233	91.4262			5) uncertainty from counting stats, excess uncert, etc.							No correction applied	No correction applied	No correction applied	No correction applied
91500_Annealed	2012	NO09A220	ok	-5.60571e-05	12669	88.7907	0.363209	5.64666	0.0648551	0.0743033	0.00120193	1.81354	0.0359788	0.177096	0.00203405	0.578941	0.0518972	0.001023	1048.84	65.2089	65.4446	1051.09	24.1447	26.3607	1050.36	41.676	43.0075	1022.65	40.3168	43.3374	100.215			Total systematic uncertainty							0.279975	1.01305	1.0221	2.41614
91500_Annealed	2012	NO09A219	ok	-0.00106162	12666	86.7215	0.352046	5.6042	0.0647203	0.0737311	0.00133609	1.81321	0.0389626	0.178437	0.00206069	0.537437	0.0541947	0.00105153	1033.24	73.2216	73.4254	1058.43	24.4467	26.667	1050.24	45.1354	46.3674	1066.74	41.3958	44.5932	102.438
91500_Annealed	2012	OC23A180	ok	-0.00352819	12395.2	85.2129	0.351982	5.52364	0.0624017	0.0721889	0.00150504	1.80118	0.0427109	0.18104	0.00204525	0.47642	0.0525173	0.00103521	990.385	84.7931	84.9549	1072.65	24.236	26.5319	1045.89	49.6016	50.7161	1034.56	40.7858	43.8416	108.307
91500_Annealed	2012	OC23A194	ok	0.000792332	12301.9	86.3098	0.354551	5.55653	0.0620381	0.075598	0.00157958	1.87507	0.0444212	0.179968	0.00200933	0.471285	0.0540048	0.00120126	1083.57	83.7923	83.9883	1066.8	23.8214	26.1295	1072.32	50.8075	51.9512	1063.1	47.2945	50.0983	98.4523
91500_Annealed	2012	OC23A171	ok	0.000729258	12513.4	82.8627	0.35318	5.54351	0.0634975	0.0756313	0.00153184	1.88031	0.0437523	0.180391	0.00206627	0.492267	0.0530105	0.00105927	1084.46	81.2136	81.4161	1069.11	24.4921	26.7517	1074.17	49.9891	51.1551	1044.03	41.7239	44.7688	98.5851
91500_Annealed	2012	OC23A181	ok	6.48991e-05	12493.9	84.3068	0.358531	5.52273	0.06455	0.0752121	0.00142111	1.87692	0.0417006	0.18107	0.00211636	0.526074	0.0536949	0.00118926	1073.3	75.8891	76.1013	1072.82	25.0783	27.3042	1072.98	47.6778	48.8963	1057.16	46.8288	49.6282	99.955
91500_Annealed	2012	OC23A210	ok	0.0018314	12655.3	90.7485	0.357198	5.50057	0.0640715	0.0768449	0.0013926	1.92539	0.0414785	0.1818	0.00211763	0.540698	0.0501508	0.000955513	1116.3	72.3224	72.5632	1076.8	25.0854	27.3266	1089.94	46.9609	48.2364	989.06	37.6888	40.7038	96.4615
91500_Annealed	2012	OC23A208	ok	0.00331673	12416.1	89.8523	0.354227	5.58022	0.0634096	0.077561	0.00156995	1.9156	0.0444668	0.179205	0.00203635	0.489523	0.0553424	0.00105876	1134.78	80.5601	80.7835	1062.63	24.1499	26.4123	1086.54	50.4435	51.6257	1088.74	41.6574	44.9637	93.6413
91500_Annealed	2012	OC23A196	ok	0.000970846	12668	86.9698	0.355543	5.48573	0.0615906	0.0762229	0.00157405	1.91497	0.0450122	0.182291	0.00204666	0.477653	0.0529525	0.000965529	1100.06	82.6115	82.8163	1079.48	24.2395	26.5632	1086.32	51.0686	52.2362	1042.91	38.0327	41.3434	98.1291
91500_Annealed	2012	OC23A195	ok	0.00143505	12493.3	85.4241	0.360476	5.65498	0.062831	0.0755011	0.00151837	1.84007	0.042277	0.176835	0.00196477	0.483586	0.0511199	0.000982979	1081	80.6799	80.8824	1049.66	23.3251	25.6062	1059.89	48.7034	49.8682	1007.7	38.7541	41.7999	97.1011
91500_Annealed	2012	OC23A209	ok	-0.00121694	12425.1	89.6188	0.363472	5.56434	0.0621875	0.0738601	0.00159215	1.8294	0.0444202	0.179716	0.00200852	0.460276	0.0509903	0.00105017	1036.77	87.0561	87.2288	1065.42	23.8145	26.1175	1056.06	51.2852	52.3847	1005.21	41.4056	44.2556	102.764
91500_Annealed	2012	OC23A170	ok	0.00034992	12761.9	80.3246	0.359701	5.51895	0.0589936	0.0754767	0.00143616	1.88481	0.0411356	0.181194	0.00193683	0.489778	0.0515393	0.00107261	1080.35	76.3435	76.5572	1073.49	22.9497	25.366	1075.76	46.9563	48.1993	1015.77	42.2793	45.1313	99.3653
91500_Annealed	2012	OC17A427	ok	0.00165818	9850.22	66.3243	0.334939	5.60807	0.065661	0.0759881	0.00161345	1.86743	0.0452798	0.178315	0.00208776	0.482875	0.048481	0.00106327	1093.89	85.019	85.2158	1057.76	24.7692	26.9603	1069.62	51.8704	52.9856	956.896	41.9725	44.5301	96.6975
91500_Annealed	2012	OC17A398	ok	0.00145696	11769.6	81.3777	0.355561	5.66831	0.0660804	0.0754354	0.00131038	1.83415	0.0383707	0.176419	0.00205667	0.557254	0.0511838	0.000972149	1079.25	69.707	69.9406	1047.38	24.4205	26.5988	1057.77	44.2573	45.531	1008.93	38.3259	41.4104	97.0472
91500_Annealed	2012	OC17A413	ok	-0.000631165	10595.8	72.067	0.355265	5.63919	0.0649206	0.0738683	0.00144003	1.80532	0.0408726	0.177331	0.0020415	0.508497	0.0490999	0.001054	1036.99	78.7268	78.9178	1052.37	24.2307	26.4447	1047.39	47.4258	48.5935	968.824	41.5943	44.2365	101.483
91500_Annealed	2012	OC17A412	ok	0.00322815	10180.2	69.0087	0.349774	5.60122	0.0691872	0.0773497	0.00146264	1.90322	0.0429866	0.178533	0.00220526	0.546888	0.0502878	0.00105949	1129.35	75.3186	75.5553	1058.95	26.1607	28.2486	1082.21	48.8865	50.0959	991.697	41.7873	44.5398	93.7663
91500_Annealed	2012	OC17A405	ok	0.00524542	11266.9	76.8342	0.363076	5.5886	0.0658746	0.0791246	0.00150661	1.95129	0.0436974	0.178936	0.00210917	0.526357	0.0500474	0.00102887	1174.39	75.3433	75.5991	1061.16	25.0164	27.201	1098.89	49.2173	50.4556	987.071	40.5843	43.3877	90.3579
91500_Annealed	2012	OC17A420	ok	0.000180914	11133.3	75.7091	0.3594	5.61572	0.0665945	0.0746995	0.00146038	1.83326	0.0419184	0.178072	0.00211168	0.518624	0.0473811	0.0010315	1059.55	78.6833	78.8828	1056.43	25.0556	27.2184	1057.45	48.3582	49.5258	935.681	40.7402	43.2585	99.7056
91500_Annealed	2012	OC17A389	ok	-0.000215716	11509.9	78.0335	0.361752	5.58731	0.0641586	0.0745503	0.00149112	1.8389	0.0424113	0.178977	0.00205517	0.497885	0.0509769	0.00108374	1055.53	80.5491	80.7425	1061.38	24.3755	26.6137	1059.47	48.8698	50.0298	1004.95	42.7296	45.4954	100.555
91500_Annealed	2012	OC17A388	ok	0.00198623	11464.7	75.3363	0.365746	5.55137	0.0647642	0.0766343	0.00144571	1.90255	0.0422002	0.180136	0.00210152	0.525964	0.0496884	0.000951924	1110.82	75.3479	75.5768	1067.72	24.9127	27.1317	1081.98	47.9986	49.2292	980.16	37.5555	40.5282	96.1195
91500_Annealed	2012	OC17A399	ok	-0.00134683	11807	80.7776	0.358311	5.53878	0.063153	0.0739197	0.00136751	1.83932	0.0399711	0.180545	0.00205857	0.524678	0.0511236	0.00107697	1038.4	74.6944	74.8962	1069.95	24.3991	26.67	1059.62	46.054	47.2835	1007.78	42.4597	45.2571	103.039
91500_Annealed	2012	OC17A428	ok	-0.00186161	9756.59	65.4368	0.329698	5.53751	0.0661032	0.0734959	0.00158369	1.8292	0.0450598	0.180587	0.00215572	0.484596	0.0496858	0.00112274	1026.78	87.1538	87.3229	1070.18	25.5502	27.7279	1055.99	52.0258	53.1099	980.108	44.2945	46.8412	104.227
91500_Annealed	2016	JN01A131	ok	-0.000175886	21855.5	59.4918	0.329042	5.60223	0.0470902	0.074487	0.000900532	1.83245	0.0269823	0.1785	0.00150041	0.570851	0.0543911	0.00116906	1053.82	48.6998	49.018	1058.78	17.7994	20.7456	1057.16	31.1327	32.9162	1070.51	46.0182	48.9343	100.471
91500_Annealed	2016	JN01A009	ok	-0.000657636	27671.9	78.5902	0.359279	5.60175	0.042243	0.0740859	0.000882832	1.82274	0.0257042	0.178516	0.00134619	0.534749	0.0539686	0.000980356	1042.93	48.0798	48.3955	1058.86	15.9698	19.1994	1053.67	29.7177	31.5692	1062.41	38.5979	41.9823	101.527
91500_Annealed	2016	JN01A187	ok	-0.000217663	28773.7	77.9245	0.364103	5.59107	0.0398287	0.0745243	0.000818727	1.83703	0.0240531	0.178857	0.00127411	0.544059	0.0539617	0.00104412	1054.82	44.2471	44.5977	1060.73	15.1124	18.5032	1058.8	27.7267	29.7212	1062.28	41.1087	44.3009	100.56
91500_Annealed	2016	JN01A266	ok	0.000284603	29342	78.063	0.357134	5.58849	0.0462748	0.0749625	0.000865214	1.84868	0.0262605	0.178939	0.00148168	0.582921	0.0532995	0.000964802	1066.62	46.4038	46.7458	1061.18	17.5739	20.565	1062.96	30.1986	32.0537	1049.57	37.9977	41.352	99.4896
91500_Annealed	2016	JN01A050	ok	0.000354225	27439.6	74.7398	0.356105	5.58593	0.0415015	0.0750376	0.000863778	1.85138	0.0253652	0.179021	0.00133007	0.542283	0.0541004	0.000973306	1068.63	46.2665	46.6108	1061.63	15.775	19.0533	1063.92	29.1529	31.0739	1064.94	38.318	41.7406	99.3442
91500_Annealed	2016	JN01A004	ok	-0.00078535	29277.6	83.2963	0.358596	5.58115	0.0412715	0.0741124	0.000880248	1.83012	0.0256054	0.179175	0.00132496	0.528536	0.0524941	0.000953081	1043.65	47.9167	48.2339	1062.46	15.7134	19.007	1056.32	29.5582	31.4283	1034.11	37.5506	40.8464	101.803
91500_Annealed	2016	JN01A103	ok	0.000889678	22040.5	60.7575	0.338313	5.57196	0.0494586	0.0755782	0.000811876	1.8694	0.02605	0.17947	0.00159304	0.636982	0.0531751	0.00113806	1083.05	43.0825	43.462	1064.08	18.8903	21.7151	1070.32	29.8297	31.7317	1047.19	44.8239	47.6879	98.2486
91500_Annealed	2016	JN01A319	ok	-0.000618575	28697.5	76.9143	0.356793	5.57669	0.0438922	0.0742814	0.000888976	1.83576	0.0262951	0.179318	0.00141135	0.549479	0.0531703	0.000984039	1048.25	48.2483	48.5661	1063.25	16.7369	19.8657	1058.34	30.3191	32.1517	1047.09	38.7577	42.0365	101.431
91500_Annealed	2016	JN01A075	ok	6.14311e-05	20795.3	57.1287	0.322328	5.57231	0.0461236	0.0748808	0.000908641	1.85203	0.027204	0.179459	0.00148543	0.563512	0.0522326	0.00113634	1064.43	48.8021	49.126	1064.02	17.6144	20.6145	1064.15	31.2621	33.0616	1029.09	44.7764	47.5479	99.9614
91500_Annealed	2016	JN01A327	ok	0.00095814	33153.3	87.512	0.355301	5.56642	0.0499831	0.075672	0.000691418	1.87358	0.0240019	0.179649	0.00161313	0.700927	0.0548883	0.000939286	1085.53	36.6312	37.0788	1065.05	19.1271	21.9262	1071.8	27.461	29.5215	1080.04	36.9647	40.5984	98.1134
91500_Annealed	2016	JN01A238	ok	0.000686029	32213.7	88.3318	0.355904	5.5665	0.0413469	0.0754431	0.000797974	1.86788	0.0241419	0.179646	0.00133438	0.574697	0.0543735	0.000925547	1079.46	42.4433	42.8259	1065.04	15.8218	19.1113	1069.78	27.6533	29.693	1070.17	36.433	40.0509	98.6644
91500_Annealed	2016	JN01A294	ok	-0.000742757	21350	56.9478	0.298495	5.5685	0.0447424	0.0742308	0.00102567	1.83721	0.0293654	0.179582	0.00144292	0.502693	0.0532213	0.00112282	1046.87	55.7171	55.9917	1064.69	17.1094	20.1883	1058.86	33.8491	35.5015	1048.07	44.2228	47.1281	101.702
91500_Annealed	2016	JN01A027	ok	-0.00155955	28094.7	76.9927	0.364155	5.56109	0.0422377	0.0735938	0.000848407	1.82387	0.0251791	0.179821	0.00136578	0.550165	0.056206	0.00108887	1029.47	46.6086	46.9259	1066	16.1929	19.4249	1054.08	29.1038	30.9935	1105.27	42.8246	46.1422	103.548
91500_Annealed	2016	JN01A215	ok	-0.00093383	36698.2	99.9472	0.362037	5.55323	0.0409424	0.0741708	0.000763473	1.84077	0.0233068	0.180075	0.00132764	0.582297	0.0538699	0.000899552	1045.24	41.5174	41.8841	1067.39	15.7391	19.0561	1060.14	26.8457	28.9061	1060.52	35.4183	39.0666	102.119
91500_Annealed	2016	JN01A003	ok	-0.000976471	28239.2	79.3072	0.362261	5.53401	0.0434442	0.0742624	0.000868266	1.84945	0.0260456	0.180701	0.00141858	0.557442	0.0540028	0.00104285	1047.73	47.1401	47.465	1070.8	16.8125	19.9704	1063.23	29.9469	31.8176	1063.06	41.0578	44.2583	102.202
91500_Annealed	2016	JN01A159	ok	-0.00162014	29776.2	81.8913	0.364086	5.53177	0.0422931	0.0737368	0.000798759	1.8371	0.0243579	0.180774	0.0013821	0.576631	0.0555282	0.00102705	1033.39	43.7701	44.1103	1071.2	16.3797	19.6097	1058.82	28.0776	30.049	1092.29	40.406	43.8283	103.659
91500-Annealed	2016	MA10D401	ok	0.00177703	17559.9	58.3752	0.346236	5.65095	0.0543854	0.0758134	0.0010432	1.849	0.031048	0.176961	0.0017031	0.573145	0.0546138	0.00130383	1089.28	55.1348	55.4352	1050.35	20.2174	22.8147	1063.07	35.7018	37.2844	1074.78	51.3177	53.9686	96.4267
91500-Annealed	2016	MA10D028	ok	0.00148486	14406.6	54.3711	0.270908	5.63973	0.0749277	0.0756397	0.00178787	1.84843	0.0501195	0.177313	0.00235573	0.489983	0.0558629	0.00195996	1084.68	94.7738	94.9474	1052.28	27.9606	29.8993	1062.87	57.6386	58.6317	1098.7	77.0964	78.9653	97.0133
91500-Annealed	2016	MA10D368	ok	-0.000283696	18803.9	60.0266	0.347167	5.61483	0.0836898	0.0743154	0.00157984	1.82412	0.0473602	0.1781	0.0026546	0.574085	0.055178	0.00168783	1049.17	85.6935	85.8731	1056.58	31.4971	33.2439	1054.17	54.7394	55.7672	1085.59	66.4138	68.5239	100.707
91500-Annealed	2016	MA10D429	ok	-0.000167692	18059	60.2483	0.354803	5.60897	0.049574	0.0744504	0.00107523	1.82935	0.0309746	0.178286	0.00157575	0.521989	0.0527487	0.00112408	1052.83	58.1846	58.4506	1057.6	18.6949	21.513	1056.04	35.762	37.3217	1039	44.2823	47.1354	100.454
91500-Annealed	2016	MA10D004	ok	0.000906889	19831.3	69.4933	0.36841	5.60241	0.0537426	0.0753943	0.00111595	1.85471	0.0327137	0.178495	0.00171226	0.543865	0.0551017	0.00115538	1078.16	59.4058	59.6791	1058.75	20.3126	22.9382	1065.11	37.573	39.0856	1084.13	45.4642	48.4868	98.1993
91500-Annealed	2016	MA10D270	ok	-0.000553953	23159.1	74.6818	0.36728	5.60084	0.0477808	0.0741788	0.000965212	1.82532	0.0284005	0.178545	0.00152317	0.548293	0.0535337	0.00107132	1045.46	52.4805	52.7713	1059.02	18.069	20.9787	1054.6	32.8175	34.506	1054.07	42.188	45.2579	101.297
91500-Annealed	2016	MA10D457	ok	0.000681	19882.1	66.5203	0.368733	5.59382	0.0496725	0.0752605	0.00099308	1.85426	0.0294919	0.178769	0.00158744	0.55831	0.0553606	0.00125332	1074.59	52.9875	53.2917	1060.24	18.8297	21.6434	1064.95	33.8758	35.5456	1089.09	49.312	52.1368	98.6648
91500-Annealed	2016	MA10D538	ok	-0.00136245	20397.8	69.0563	0.368921	5.59336	0.0514424	0.0735488	0.00094806	1.81224	0.0286966	0.178783	0.00164428	0.58081	0.0528866	0.00106329	1028.23	52.1248	52.408	1060.33	19.5037	22.2327	1049.89	33.2496	34.9027	1041.65	41.885	44.9056	103.121
91500-Annealed	2016	MA10D003	ok	-0.000343896	14870.8	54.3045	0.262856	5.59092	0.0534559	0.0744193	0.0010041	1.83449	0.0303363	0.178861	0.00171013	0.578181	0.0536505	0.00130894	1051.98	54.3649	54.6491	1060.75	20.2841	22.9223	1057.89	34.9879	36.5861	1056.31	51.5427	54.0947	100.833
91500-Annealed	2016	MA10D237	ok	-0.00036913	18612.5	61.4597	0.359281	5.5909	0.0519766	0.0743983	0.00103286	1.83398	0.0306422	0.178862	0.00166282	0.556417	0.052263	0.00110452	1051.41	55.9426	56.2186	1060.76	19.7229	22.4273	1057.7	35.3444	36.9266	1029.67	43.522	46.3716	100.888
91500-Annealed	2016	MA10D335	ok	0.000699945	23210.3	75.4647	0.36342	5.58623	0.049815	0.0753257	0.000971448	1.85839	0.0291385	0.179012	0.00159633	0.568737	0.0530328	0.00103716	1076.33	51.7749	52.0872	1061.57	18.9331	21.7399	1066.42	33.4415	35.1365	1044.45	40.8525	43.9602	98.6287
91500-Annealed	2016	MA10D106	ok	0.000290294	17319	57.9344	0.338262	5.56735	0.055088	0.0751054	0.00112692	1.85924	0.0334167	0.179619	0.0017773	0.550527	0.0522399	0.00120889	1070.45	60.2902	60.5556	1064.89	21.0738	23.6429	1066.72	38.3449	39.8326	1029.23	47.6352	50.25	99.4808
91500-Annealed	2016	MA10D537	ok	-1.32133e-05	20695.9	68.597	0.371172	5.56752	0.0482897	0.0748496	0.000980577	1.85285	0.0291113	0.179613	0.00155787	0.55204	0.0536524	0.00115758	1063.59	52.6944	52.994	1064.86	18.4721	21.3563	1064.44	33.4483	35.1369	1056.34	45.5825	48.4497	100.12
91500-Annealed	2016	MA10D204	ok	0.000124803	19265.6	60.7406	0.35895	5.56512	0.0487404	0.0749811	0.00094221	1.85691	0.0284422	0.179691	0.00157377	0.571797	0.0531974	0.00117132	1067.12	50.517	50.8316	1065.28	18.6599	21.5211	1065.89	32.6523	34.3845	1047.61	46.1335	48.9231	99.8279
91500-Annealed	2016	MA10D051	ok	-0.00271446	17686.7	58.8856	0.357466	5.56465	0.0558883	0.0726011	0.00107435	1.79811	0.0321582	0.179706	0.00180486	0.561574	0.0533171	0.00110367	1001.95	60.0788	60.3123	1065.37	21.3999	23.9361	1044.77	37.3704	38.8344	1049.91	43.4667	46.4294	106.329
91500-Annealed	2016	MA10D137	ok	-0.00187623	18382.6	61.6132	0.354373	5.55781	0.0499455	0.0733496	0.00119022	1.81889	0.0337384	0.179927	0.00161692	0.484479	0.0543745	0.00118991	1022.75	65.671	65.8936	1066.58	19.1697	21.9709	1052.29	39.0375	40.4611	1070.19	46.8391	49.7054	104.285
91500-Annealed	2016	MA10D509	ok	0.000885678	20432.6	66.7461	0.368641	5.54155	0.0477195	0.0757756	0.0010812	1.88456	0.0314073	0.180455	0.00155394	0.516706	0.0539887	0.00113453	1088.28	57.1803	57.4696	1069.46	18.4187	21.3334	1075.67	35.8534	37.4663	1062.79	44.6677	47.6247	98.2709
91500-Annealed	2016	MA10D170	ok	0.00118206	22050.5	72.22	0.364051	5.53605	0.0478631	0.076061	0.00100353	1.89354	0.0298688	0.180634	0.00156171	0.548096	0.0532915	0.00113685	1095.81	52.8139	53.1313	1070.44	18.5094	21.4167	1078.82	34.0349	35.7398	1049.42	44.7737	47.6526	97.6849
91500-Annealed	2016	MA10D302	ok	-0.00153809	23409.7	74.34	0.366677	5.54026	0.0459955	0.0737493	0.000885048	1.8346	0.0267714	0.180497	0.00149849	0.568924	0.0558578	0.00110845	1033.74	48.4878	48.7953	1069.69	17.7612	20.7696	1057.93	30.8757	32.6757	1098.61	43.6019	46.8267	103.478
91500-Annealed	2016	MA10D077	ok	-0.00159067	17607	59.1069	0.348965	5.57873	0.0537127	0.0734523	0.000985689	1.81461	0.0299703	0.179252	0.00172587	0.582954	0.0565015	0.00122728	1025.58	54.2867	54.5572	1062.89	20.4673	23.0945	1050.74	34.7084	36.2976	1110.92	48.2614	51.2577	103.638
91500-Annealed	2016	MA10D485	ok	0.00129745	19367.4	65.5667	0.367824	5.53139	0.0583645	0.0761891	0.00109976	1.89833	0.033942	0.180786	0.00190757	0.590131	0.0546968	0.00115307	1099.17	57.7524	58.0445	1071.27	22.607	25.0467	1080.5	38.6387	40.1532	1076.37	45.3821	48.368	97.4615
NIST610	2016	JN01A001	ok		161847	459.505	0.99108	4.43361	0.0416446	0.911449	0.00269961	28.3326	0.279043	0.22555	0.00211857	0.953708	0.497072	0.00578276
NIST610	2016	JN01A329	ok		167858	456.143	0.994628	4.43084	0.0445584	0.911324	0.00292233	28.3465	0.299206	0.225691	0.00226964	0.952736	0.492066	0.0057263
NIST610	2016	JN01A188	ok		164991	459.672	0.984251	4.41672	0.045398	0.910311	0.00272159	28.4055	0.304071	0.226412	0.00232722	0.960206	0.498211	0.00587746
NIST610	2016	JN01A002	ok		163302	457.943	0.991694	4.42511	0.0445933	0.910023	0.00284629	28.3426	0.299059	0.225983	0.00227731	0.955057	0.496704	0.00583272
NIST610	2016	JN01A076	ok		162526	455.659	0.992066	4.4178	0.046626	0.909842	0.00308541	28.3839	0.314651	0.226357	0.002389	0.952061	0.496714	0.00585663
NIST610	2016	JN01A028	ok		162708	469.951	0.994009	4.39517	0.0452924	0.90994	0.00279302	28.5331	0.306802	0.227523	0.00234463	0.958389	0.497662	0.00581591
NIST610	2016	JN01A268	ok		164742	463.015	0.990451	4.40271	0.0436576	0.908842	0.0027577	28.4499	0.295023	0.227133	0.00225226	0.956233	0.495077	0.00583456
NIST610	2016	JN01A216	ok		163124	457.213	0.986663	4.41194	0.0457613	0.90831	0.00279573	28.3737	0.306981	0.226657	0.00235092	0.958679	0.49407	0.00590187
NIST610	2016	JN01A295	ok		167325	458.037	0.992682	4.38649	0.043672	0.908893	0.00284561	28.5567	0.298037	0.227973	0.0022697	0.953944	0.49447	0.00576452
NIST610	2016	JN01A328	ok		170561	463.472	0.991941	4.38896	0.0428402	0.908695	0.00288387	28.5344	0.292873	0.227844	0.00222396	0.950995	0.496998	0.00579954
NIST610	2016	JN01A132	ok		164783	462.777	0.987991	4.40144	0.047414	0.908193	0.00280697	28.4378	0.318702	0.227198	0.00244747	0.961219	0.496745	0.00583407
NIST610	2016	JN01A104	ok		164378	458.651	0.988319	4.4055	0.0454331	0.907317	0.00283152	28.3841	0.305829	0.226989	0.00234089	0.957136	0.49989	0.00585113
NIST610	2016	JN01A160	ok		164504	469.373	0.989414	4.41058	0.0451465	0.907006	0.00276891	28.3417	0.302732	0.226728	0.00232077	0.958288	0.494581	0.00579652
NIST610	2016	JN01A051	ok		164001	460.703	0.99292	4.41525	0.0474127	0.90612	0.00284315	28.2841	0.316427	0.226488	0.00243212	0.959863	0.49572	0.00582654
NIST610	2016	JN01A239	ok		163915	470.385	0.992081	4.38995	0.0464456	0.905965	0.00284342	28.4422	0.31388	0.227793	0.00241004	0.958706	0.496359	0.00577469
NIST610	2016	MA10D402	ok		130600	462.003	0.989066	4.3727	0.0389382	0.918177	0.00336489	28.9394	0.27867	0.228692	0.00203646	0.924749	0.510829	0.0058868
NIST610	2016	MA10D458	ok		129331	458.212	0.991943	4.35644	0.0401539	0.913025	0.00310432	28.8844	0.283768	0.229545	0.00211575	0.938203	0.507549	0.00591421
NIST610	2016	MA10D002	ok		122181	472.767	0.986028	4.34815	0.0403676	0.913255	0.00313524	28.9468	0.286523	0.229983	0.00213513	0.937927	0.518966	0.00603296
NIST610	2016	MA10D430	ok		123399	459.092	0.987949	4.3884	0.041024	0.911014	0.00324854	28.6109	0.28626	0.227874	0.00213023	0.934335	0.506909	0.00591216
NIST610	2016	MA10D001	ok		123855	465.828	0.98744	4.30345	0.0390199	0.912382	0.0031677	29.2194	0.283694	0.232372	0.00210694	0.933878	0.525335	0.00619607
NIST610	2016	MA10D107	ok		126951	460.366	0.986384	4.37898	0.0408529	0.909625	0.00328625	28.6287	0.286412	0.228363	0.00213047	0.932521	0.514596	0.0060076
NIST610	2016	MA10D486	ok		129367	471.837	0.988409	4.36051	0.0393857	0.910151	0.00310859	28.7666	0.277786	0.229331	0.0020714	0.935361	0.507992	0.00591651
NIST610	2016	MA10D510	ok		126208	473.949	0.990864	4.34999	0.0420461	0.910415	0.00312233	28.8445	0.295835	0.229885	0.00222202	0.942435	0.505797	0.00588105
NIST610	2016	MA10D271	ok		131175	468.959	0.99461	4.3604	0.0414382	0.90964	0.0031201	28.7512	0.290483	0.229337	0.00217945	0.940608	0.513379	0.0059301
NIST610	2016	MA10D336	ok		131120	465.793	0.989541	4.3794	0.0397645	0.908437	0.00307812	28.5885	0.277067	0.228342	0.00207332	0.936891	0.510615	0.00593319
NIST610	2016	MA10D540	ok		129403	432.079	0.99346	4.36048	0.042497	0.908992	0.00322967	28.7301	0.298029	0.229333	0.00223506	0.939513	0.501086	0.00596715
NIST610	2016	MA10D539	ok		128346	474.751	0.984066	4.35014	0.042351	0.909263	0.00307871	28.807	0.29693	0.229878	0.00223799	0.944507	0.5064	0.00603075
NIST610	2016	MA10D138	ok		127849	460.665	0.989218	4.34712	0.0390318	0.909283	0.00282658	28.8277	0.27391	0.230037	0.00206545	0.944968	0.516331	0.00595017
NIST610	2016	MA10D171	ok		131133	460.657	0.988407	4.37164	0.0402119	0.907754	0.00323391	28.6178	0.28229	0.228747	0.0021041	0.932504	0.514667	0.00602346
NIST610	2016	MA10D052	ok		124846	440.298	0.990816	4.29867	0.0392346	0.909767	0.00307734	29.1681	0.283916	0.23263	0.00212325	0.937677	0.522144	0.00609913
NIST610	2016	MA10D029	ok		124792	462.896	0.997393	4.33697	0.0428615	0.908419	0.00314948	28.8677	0.30234	0.230576	0.00227874	0.94362	0.513425	0.00620177
NIST610	2016	MA10D238	ok		129269	453.82	0.992736	4.36629	0.040703	0.907187	0.00310109	28.635	0.28432	0.229028	0.00213502	0.938868	0.513114	0.00595965
NIST610	2016	MA10D078	ok		125500	465.724	0.987932	4.34382	0.0414549	0.90771	0.00317306	28.7997	0.292705	0.230212	0.00219701	0.93899	0.517734	0.00606159
NIST610	2016	MA10D303	ok		135004	458.72	1.00075	4.32604	0.0383278	0.904483	0.0028915	28.8152	0.271407	0.231158	0.00204801	0.940639	0.50881	0.00581106
NIST610	2016	MA10D205	ok		135583	461.578	0.997217	4.32542	0.0353509	0.90412	0.0030162	28.8078	0.2543	0.231191	0.00188949	0.925839	0.509334	0.00590238
Plesovice_Annealed	2012	NO09A237	ok	0.000660011	30585	729.552	0.0911603	18.7871	0.174892	0.0536583	0.000679024	0.393632	0.00618391	0.0532282	0.000495511	0.59257	0.0162831	0.000370572	355.754	57.1414	57.1723	334.31	6.22431	7.07561	337.019	10.589	11.1237	326.466	14.8595	15.7021	93.9722
Plesovice_Annealed	2012	NO09A235	ok	0.000683697	31197.9	717.025	0.0931295	18.7128	0.180455	0.0537077	0.000775025	0.395558	0.00686533	0.0534394	0.000515339	0.555624	0.0165453	0.00040857	357.832	65.1361	65.1636	335.603	6.47273	7.3011	338.422	11.7473	12.2354	331.681	16.3811	17.1732	93.7877
Plesovice_Annealed	2012	NO09A234	ok	-0.00058148	29261.9	685.306	0.091722	18.6719	0.17081	0.0527062	0.000840312	0.389032	0.00715094	0.0535564	0.000489932	0.497676	0.0167533	0.000382917	315.178	72.5122	72.5314	336.319	6.15327	7.02292	333.662	12.2663	12.7217	335.816	15.351	16.2142	106.708
Plesovice_Annealed	2012	NO09A236	ok	5.96474e-05	33219.4	768.784	0.0953987	18.5807	0.17416	0.05326	0.000644109	0.395048	0.00604453	0.0538191	0.000504456	0.612595	0.0170756	0.000379129	338.903	54.7718	54.8012	337.926	6.33488	7.19021	338.05	10.3449	10.8948	342.223	15.1967	16.1008	99.712
Plesovice_Annealed	2012	NO09A233	ok	0.000503592	31494.3	731.401	0.0940982	18.5068	0.174447	0.0536483	0.000809665	0.399518	0.00710898	0.0540341	0.000509331	0.529738	0.0168645	0.000404876	355.332	68.1529	68.1788	339.241	6.39545	7.24986	341.299	12.1461	12.6267	338.027	16.2304	17.0597	95.4717
Plesovice_Annealed	2012	NO09A238	ok	0.00126609	32872.6	776.335	0.09418	18.3535	0.171581	0.0543273	0.000734841	0.407954	0.00670778	0.0544855	0.000509367	0.568568	0.0163856	0.000366695	383.663	60.7773	60.8112	342.002	6.39452	7.26216	347.401	11.4243	11.952	328.505	14.7033	15.5648	89.1411
Plesovice_Annealed	2012	OC23A179	ok	-6.87301e-05	28675.9	668.465	0.0901842	18.591	0.175312	0.0531524	0.000900473	0.394033	0.0076399	0.0537895	0.000507232	0.486355	0.0168446	0.000397294	334.32	76.7892	76.8096	337.745	6.36983	7.22017	337.311	13.0803	13.5175	337.632	15.9266	16.769	101.024
Plesovice_Annealed	2012	OC23A174	ok	0.000596245	32566	711.214	0.0953222	18.4099	0.17081	0.0537638	0.000915563	0.402486	0.00780535	0.0543186	0.000503975	0.478431	0.0168025	0.000389642	360.189	76.8351	76.8588	340.981	6.32733	7.19817	343.45	13.3209	13.766	336.793	15.6202	16.4741	94.6672
Plesovice_Annealed	2012	OC23A176	ok	0.00140885	32682	724.527	0.0953957	18.3827	0.17058	0.0544297	0.000782331	0.408073	0.00698147	0.0543988	0.000504787	0.542388	0.0172843	0.000397756	387.895	64.5353	64.568	341.472	6.33728	7.20927	347.487	11.8899	12.398	346.37	15.9417	16.8263	88.032
Plesovice_Annealed	2012	OC23A177	ok	0.00126668	32355.7	720.318	0.0937134	18.3344	0.165579	0.054336	0.000925726	0.408445	0.00787592	0.0545424	0.000492575	0.468351	0.0169473	0.000359028	384.022	76.548	76.5749	342.349	6.18355	7.0788	347.755	13.4113	13.8645	339.672	14.3919	15.3298	89.1483
Plesovice_Annealed	2012	OC23A173	ok	-0.000252998	31127.4	680.289	0.0937136	18.2233	0.162034	0.0531601	0.000841268	0.402043	0.00729789	0.0548749	0.000487925	0.48984	0.0165691	0.000370238	334.651	71.7257	71.7476	344.382	6.1242	7.03707	343.129	12.457	12.931	332.154	14.844	15.7163	102.908
Plesovice_Annealed	2012	OC23A175	ok	-0.000451877	32984.5	714.503	0.0950124	18.2164	0.170339	0.053003	0.000804557	0.401005	0.00714932	0.0548956	0.000513322	0.52449	0.0171317	0.000366246	327.936	68.8813	68.9032	344.508	6.44291	7.31673	342.377	12.2081	12.6894	343.336	14.6799	15.6199	105.054
Plesovice_Annealed	2012	OC23A178	ok	-0.00335544	32463.3	738.041	0.0947722	18.2245	0.165986	0.0506611	0.000822142	0.383117	0.00712958	0.0548712	0.000499759	0.489423	0.016197	0.000392343	224.435	75.0236	75.033	344.359	6.27275	7.16662	329.329	12.2572	12.7014	324.755	15.7332	16.5232	153.434
Plesovice_Annealed	2012	OC17A390	ok	-0.00105017	30818.3	700.513	0.0924296	18.7069	0.165957	0.0523145	0.000759481	0.385418	0.00655735	0.0534562	0.000474232	0.521431	0.0154812	0.000352982	298.189	66.2284	66.2472	335.706	5.95637	6.84801	331.017	11.2636	11.7502	310.513	14.1598	14.9598	112.582
Plesovice_Annealed	2012	OC17A391	ok	0.000534787	32230.4	733.345	0.0944953	18.6176	0.164757	0.0536271	0.000756019	0.396984	0.00660783	0.0537125	0.00047533	0.531659	0.0156667	0.000344332	354.441	63.6725	63.7001	337.274	5.96943	6.86716	339.458	11.3006	11.8102	314.203	13.8115	14.6496	95.1566
Plesovice_Annealed	2012	OC17A392	ok	0.000678651	30433.6	688.594	0.0927062	18.5276	0.169177	0.0537805	0.000760584	0.400054	0.0067345	0.0539735	0.000492837	0.54242	0.0156866	0.000335992	360.888	63.8015	63.8301	338.871	6.18852	7.06619	341.687	11.5039	12.0114	314.6	13.4769	14.3366	93.8992
Plesovice_Annealed	2012	OC17A395	ok	0.000230608	29777.8	655.665	0.0908349	18.5151	0.164348	0.053425	0.000810285	0.397677	0.00698851	0.0540099	0.000479415	0.505108	0.0158953	0.000376829	345.907	68.6045	68.6289	339.093	6.01987	6.92007	339.962	11.9485	12.433	318.753	15.1133	15.9047	98.0303
Plesovice_Annealed	2012	OC17A393	ok	-0.00253375	30494.2	688.726	0.0914819	18.5525	0.180871	0.0511839	0.000704682	0.380226	0.00641438	0.053901	0.000525487	0.5779	0.0159916	0.000417446	248.119	63.3755	63.3891	338.427	6.59873	7.42603	327.205	11.0398	11.5248	320.669	16.7415	17.4678	136.397
Plesovice_Annealed	2012	OC17A397	ok	5.09143e-05	32944.3	742.45	0.0947054	18.5015	0.167404	0.0532861	0.000745098	0.396934	0.00661096	0.0540496	0.000489046	0.543264	0.0163382	0.000366256	340.012	63.3159	63.3415	339.336	6.14069	7.02661	339.422	11.3062	11.8155	327.563	14.6861	15.5437	99.8012
Plesovice_Annealed	2012	OC17A394	ok	-0.000534103	33819.7	751.212	0.0946556	18.5068	0.162016	0.0528128	0.000802735	0.393296	0.00689859	0.0540341	0.000473035	0.499097	0.0159775	0.000368383	319.776	69.073	69.0937	339.241	5.9397	6.85118	336.774	11.8144	12.2952	320.388	14.774	15.5908	106.087
Plesovice_Annealed	2012	OC17A396	ok	-0.00116935	34006.9	758.557	0.0959026	18.429	0.165498	0.0523342	0.000770239	0.391377	0.00674778	0.0542622	0.000487289	0.520863	0.0160974	0.000347826	299.045	67.1311	67.1497	340.636	6.11801	7.01319	335.375	11.5645	12.0513	322.774	13.9487	14.8236	113.908
Plesovice_Annealed	2016	JN01A029	ok	0.00131566	78642.3	778.988	0.126934	18.7211	0.131838	0.054213	0.000577067	0.399102	0.00509378	0.0534156	0.000376164	0.551763	0.0167128	0.000322941	378.93	47.8686	47.9105	335.457	4.72473	5.80716	340.997	8.70436	9.36219	335.012	12.9468	13.9548	88.5277
Plesovice_Annealed	2016	JN01A006	ok	0.000216202	43338.5	414.869	0.122452	18.683	0.127085	0.0533437	0.000608201	0.393502	0.00522433	0.0535245	0.000364083	0.512347	0.0173265	0.000418662	342.458	51.6047	51.6365	336.124	4.57274	5.68817	336.925	8.94636	9.57288	347.209	16.7792	17.6258	98.1505
Plesovice_Annealed	2016	JN01A321	ok	0.000694296	65255.3	563.766	0.11149	18.5877	0.128748	0.053768	0.00050456	0.398667	0.00464984	0.053799	0.00037264	0.593864	0.0170272	0.000352836	360.363	42.3388	42.3817	337.803	4.6796	5.78435	340.681	7.94705	8.66131	341.261	14.1431	15.1052	93.7398
Plesovice_Annealed	2016	JN01A161	ok	-0.000245356	40040.9	368.511	0.109374	18.5433	0.126248	0.0530301	0.000604931	0.394138	0.00523595	0.0539279	0.000367157	0.512496	0.0174408	0.00042004	329.096	51.7534	51.7827	338.592	4.61046	5.73327	337.388	8.9641	9.59112	349.478	16.8335	17.6883	102.885
Plesovice_Annealed	2016	JN01A189	ok	-0.000371612	50797	457.936	0.113912	18.4189	0.125963	0.0529808	0.000536934	0.396431	0.0048468	0.0542922	0.000371292	0.55936	0.0172388	0.00039605	326.985	45.9961	46.0286	340.819	4.66158	5.78772	339.056	8.29067	8.97135	345.466	15.8737	16.7574	104.231
Plesovicer-Annealed	2016	MA10D108	ok	0.000258155	36044.4	399.11	0.0856085	18.9973	0.196609	0.0532504	0.000644777	0.386317	0.0061535	0.0526391	0.000544778	0.64973	0.0167792	0.000447241	338.496	54.8425	54.8717	330.704	6.84511	7.61149	331.675	10.5663	11.0856	336.33	17.9295	18.6761	97.698
Plesovicer-Annealed	2016	MA10D534	ok	-0.000155098	30457.4	328.76	0.100711	18.9339	0.216568	0.0529431	0.0012309	0.385374	0.00998535	0.0528154	0.000604109	0.441442	0.0171308	0.000771329	325.372	105.55	105.564	331.783	7.58996	8.29211	330.984	17.1522	17.4755	343.319	30.9165	31.3737	101.971
Plesovicer-Annealed	2016	MA10D006	ok	0.000169872	32376.6	384.163	0.0831079	18.8775	0.149047	0.0532272	0.000750462	0.388598	0.00627951	0.052973	0.000418246	0.488599	0.017981	0.000543626	337.51	63.8706	63.8955	332.748	5.2544	6.231	333.345	10.7733	11.2881	360.208	21.7806	22.4887	98.5893
Plesovicer-Annealed	2016	MA10D030	ok	0.00045208	60212.9	672.678	0.101024	18.8262	0.143201	0.0534751	0.000511719	0.391472	0.00478541	0.0531174	0.000404036	0.62225	0.0172802	0.000398509	348.024	43.269	43.3081	333.632	5.07553	6.08583	335.444	8.20103	8.87456	346.287	15.9719	16.8545	95.8648
Plesovicer-Annealed	2016	MA10D403	ok	0.000726478	34855.4	360.812	0.0913778	18.7552	0.243636	0.0537248	0.00109582	0.394789	0.00954693	0.0533186	0.000692626	0.537183	0.0162654	0.000822817	358.55	92.0563	92.0759	334.864	8.69998	9.33003	337.862	16.3406	16.6938	326.114	32.9943	33.3815	93.3939
Plesovicer-Annealed	2016	MA10D369	ok	0.000243412	32153.7	378.784	0.0829123	18.652	0.235514	0.0533784	0.00125455	0.394413	0.010523	0.0536135	0.000676961	0.473264	0.0172593	0.000880979	343.929	106.349	106.365	336.668	8.50202	9.15242	337.588	18.0137	18.3342	345.873	35.3093	35.7162	97.8889
Plesovicer-Annealed	2016	MA10D535	ok	-0.000603595	22288.5	290.158	0.10095	18.648	0.221106	0.0526982	0.00138488	0.389471	0.0112286	0.053625	0.00063582	0.411259	0.0168956	0.00111571	314.834	119.529	119.541	336.739	7.98527	8.67478	333.983	19.2577	19.5515	338.645	44.7251	45.0338	106.957
Mudtank_Annealed	2012	NO09A228	ok	0.00975892	584.352	6.40843	0.473788	8.82032	0.376384	0.0705468	0.00743043	1.10231	0.125269	0.113375	0.00483797	0.375498	0.0348792	0.00256871	943.42	431.472	431.501	692.317	59.0856	59.4951	754.469	171.479	171.649	692.97	102.069	102.635	73.3837
Mudtank_Annealed	2012	NO09A227	ok	0.0481613	595.436	6.30597	0.400836	8.3225	0.341136	0.103352	0.00828034	1.71151	0.154026	0.120156	0.00492517	0.45547	0.0387496	0.0026167	1684.37	295.732	295.866	731.463	59.9649	60.4151	1012.85	182.301	182.589	768.423	103.781	104.466	43.4264
Mudtank_Annealed	2012	NO09A221	ok	0.0178269	532.45	5.69928	0.360236	8.57655	0.374525	0.0777413	0.00830068	1.24926	0.144112	0.116597	0.00509162	0.378548	0.0376683	0.00327276	1139.4	424.663	424.705	710.947	62.092	62.503	823.069	189.895	190.077	747.372	129.868	130.387	62.3964
Mudtank_Annealed	2012	NO09A230	ok	0.00567266	622.126	6.82147	0.537735	8.67648	0.329996	0.0675122	0.00670561	1.07239	0.114056	0.115254	0.00438351	0.357601	0.0347119	0.00235842	852.71	412.693	412.718	703.19	53.4895	53.9557	739.91	157.39	157.567	689.702	93.7206	94.3318	82.4653
Mudtank_Annealed	2012	NO09A225	ok	0.00478659	552.478	5.91608	0.344764	8.59661	0.346322	0.0669681	0.0075361	1.07363	0.128327	0.116325	0.00468625	0.337046	0.0410993	0.00328929	835.875	468.821	468.842	709.376	57.1557	57.5999	740.517	177.023	177.181	814.092	130.308	130.921	84.8662
Mudtank_Annealed	2012	NO09A222	ok	-0.00494185	520.819	5.66367	0.358226	8.63039	0.364816	0.0588895	0.0068991	0.940414	0.117125	0.11587	0.00489793	0.339401	0.0361773	0.00326891	562.064	510.462	510.471	706.746	59.7498	60.1717	673.099	167.664	167.802	718.308	129.81	130.289	125.741
Mudtank_Annealed	2012	NO09A226	ok	0.00862865	564.164	5.93412	0.37704	8.46372	0.367846	0.0704458	0.00707625	1.14711	0.12555	0.118151	0.00513503	0.397095	0.0375839	0.00276209	940.485	411.681	411.711	719.915	62.5771	62.9952	775.879	169.838	170.019	745.728	109.609	110.22	76.5472
Mudtank_Annealed	2012	NO09A224	ok	-0.00282221	555.792	6.02428	0.345874	8.48955	0.328688	0.0609606	0.00708054	0.989639	0.121164	0.117792	0.00456052	0.31623	0.0338095	0.00276739	636.907	499.779	499.79	717.842	55.585	56.0526	698.536	171.047	171.192	672.068	110.021	110.515	112.707
Mudtank_Annealed	2012	NO09A229	ok	0.00229655	568.225	5.95827	0.349728	8.3907	0.29994	0.0654125	0.00702468	1.07442	0.121607	0.11918	0.00426027	0.315829	0.038359	0.00298266	786.718	450.921	450.94	725.84	51.8927	52.4045	740.907	167.717	167.884	760.82	118.318	118.907	92.2617
Mudtank_Annealed	2012	NO09A223	ok	0.00898922	539.552	5.63508	0.361027	8.29384	0.331108	0.0711663	0.00666386	1.18258	0.120379	0.120571	0.00481347	0.392189	0.0361589	0.00297219	961.304	382.535	382.569	733.852	58.5939	59.0576	792.515	161.345	161.544	717.949	118.028	118.554	76.3392
Mudtank_Annealed	2012	OC23A185	ok	0.0167383	537.776	5.8686	0.373688	8.71606	0.369529	0.0765184	0.00873571	1.20992	0.147348	0.114731	0.00486416	0.348131	0.0360744	0.00365602	1107.8	456.185	456.223	700.164	59.3687	59.7855	805.156	196.108	196.277	716.3	145.189	145.616	63.2033
Mudtank_Annealed	2012	OC23A183	ok	0.0125097	638.912	6.78331	0.501635	8.62984	0.325015	0.073242	0.00682004	1.16969	0.117489	0.115877	0.00436413	0.37495	0.0347145	0.00238373	1019.77	377.023	377.062	706.789	53.2378	53.7109	786.498	157.999	158.199	689.754	94.726	95.3309	69.3084
Mudtank_Annealed	2012	OC23A184	ok	-0.00217158	580.024	6.02468	0.416666	8.44213	0.330565	0.0616094	0.00745258	1.00579	0.127881	0.118454	0.00463823	0.307969	0.0448401	0.00341982	659.645	518.542	518.553	721.657	56.5152	56.98	706.745	179.718	179.86	886.585	135.235	135.935	109.401
Mudtank_Annealed	2012	OC23A190	ok	0.0177672	575.79	5.7972	0.36275	8.26594	0.329837	0.0784686	0.00828858	1.30833	0.14773	0.120978	0.00482742	0.353391	0.0467433	0.00377274	1157.9	418.974	419.019	736.193	58.7528	59.2182	849.391	191.818	192.01	923.37	149.054	149.743	63.58
Mudtank_Annealed	2012	OC23A188	ok	0.00952778	565.471	5.83102	0.375076	8.27425	0.320128	0.0716601	0.00779746	1.19361	0.137844	0.120857	0.00467591	0.335017	0.0298921	0.00302501	975.414	443.562	443.592	735.494	56.912	57.3914	797.631	184.23	184.406	595.332	120.492	120.847	75.4032
Mudtank_Annealed	2012	OC23A192	ok	0.0127475	568.247	5.91789	0.373356	8.21315	0.310465	0.0744713	0.00772043	1.24966	0.137896	0.121756	0.00460249	0.342566	0.0376327	0.00389661	1053.39	417.628	417.665	740.663	55.9955	56.4895	823.251	181.686	181.876	746.678	154.627	155.062	70.3122
Mudtank_Annealed	2012	OC23A182	ok	0.0190842	587.135	5.87826	0.41345	8.12303	0.320896	0.0799347	0.00901712	1.35622	0.1621	0.123107	0.00486328	0.330517	0.0364779	0.00266745	1194.52	445.06	445.105	748.421	59.132	59.6099	870.242	208.028	208.214	724.171	105.91	106.507	62.6546
Mudtank_Annealed	2012	OC23A193	ok	-0.00751327	566.465	6.02866	0.37037	8.34796	0.307218	0.0574407	0.00699883	0.948312	0.120702	0.11979	0.00440844	0.289136	0.0395	0.00359613	507.535	535.848	535.855	729.353	53.6826	54.1822	677.223	172.395	172.531	783.017	142.574	143.093	143.705
Mudtank_Annealed	2012	OC23A187	ok	-0.00239927	580.897	6.00252	0.3723	8.25701	0.312614	0.0618792	0.00754243	1.03284	0.131826	0.121109	0.00458524	0.296632	0.032933	0.0032578	669.006	521.698	521.71	736.945	55.802	56.2928	720.348	183.882	184.026	654.924	129.573	129.972	110.155
Mudtank_Annealed	2012	OC23A186	ok	0.00707834	589.748	6.05683	0.375123	8.12739	0.320104	0.0700263	0.00738754	1.18747	0.13372	0.123041	0.00484606	0.349758	0.0343799	0.00360137	928.232	433.188	433.215	748.042	58.9245	59.4036	794.786	179	179.18	683.216	143.137	143.53	80.5878
Mudtank_Annealed	2012	OC23A191	ok	-0.00368855	565.744	5.7853	0.361075	8.17478	0.346413	0.0610276	0.0079641	1.02887	0.141169	0.122327	0.00518372	0.308844	0.0373823	0.00362368	639.27	561.307	561.318	743.946	63.0506	63.4937	718.364	197.13	197.264	741.799	143.814	144.275	116.374
Mudtank_Annealed	2012	OC23A189	ok	-0.0118738	601.551	5.96783	0.418014	8.06679	0.32411	0.0545624	0.00684151	0.932191	0.12274	0.123965	0.0049807	0.305147	0.0348834	0.00317564	393.359	562.451	562.455	753.345	60.5362	61.0092	668.787	176.116	176.246	693.052	126.185	126.644	191.516
Mudtank_Annealed	2012	OC17A417	ok	0.0164114	531.97	5.61727	0.355697	8.75454	0.356309	0.0761615	0.00810035	1.19899	0.136539	0.114226	0.004649	0.357396	0.0357012	0.00313729	1098.45	425.578	425.618	697.247	56.7557	57.1879	800.119	182.233	182.413	709.019	124.612	125.098	63.4755
Mudtank_Annealed	2012	OC17A414	ok	0.0162788	546.603	5.73445	0.366725	8.6272	0.346721	0.0763477	0.00819659	1.21966	0.139815	0.115912	0.00465844	0.350586	0.0345544	0.00328535	1103.33	429.273	429.313	706.994	56.8272	57.271	809.619	185.621	185.801	686.626	130.565	131.001	64.0781
Mudtank_Annealed	2012	OC17A426	ok	0.00351767	522.983	5.50199	0.350958	8.7033	0.350509	0.0656795	0.00721199	1.04006	0.121644	0.114899	0.00462734	0.344338	0.0352762	0.00340668	795.265	460.431	460.451	701.137	56.474	56.9132	723.947	169.343	169.501	700.723	135.34	135.777	88.1639
Mudtank_Annealed	2012	OC17A421	ok	0.0113674	537.325	5.71944	0.372404	8.62011	0.350024	0.0723254	0.00718427	1.15635	0.12409	0.116008	0.00471056	0.378389	0.0368354	0.00297573	994.226	403.757	403.792	707.544	57.4604	57.9001	780.238	167.457	167.643	731.142	118.13	118.675	71.1654
Mudtank_Annealed	2012	OC17A424	ok	0.00952381	572.657	5.79683	0.37375	8.5074	0.344074	0.0710767	0.008383	1.15144	0.143567	0.117545	0.004754	0.324371	0.0325924	0.00258088	958.73	482.018	482.045	716.416	57.9497	58.3966	777.924	193.991	194.15	648.258	102.666	103.16	74.7256
Mudtank_Annealed	2012	OC17A425	ok	0.0112324	567.13	5.74549	0.391955	8.41535	0.318295	0.0727077	0.00886482	1.19075	0.152006	0.11883	0.00449455	0.29629	0.0367487	0.00281826	1004.93	494.777	494.805	723.828	54.755	55.2375	796.308	203.307	203.466	729.45	111.883	112.456	72.0275
Mudtank_Annealed	2012	OC17A422	ok	-0.00902833	567.127	5.78031	0.371235	8.4521	0.327468	0.0559422	0.00719005	0.912194	0.122452	0.118314	0.00458395	0.288619	0.0303695	0.00302836	449.109	570.949	570.954	720.851	55.8573	56.3265	658.223	176.719	176.844	604.7	120.598	120.963	160.507
Mudtank_Annealed	2012	OC17A418	ok	0.00753719	579.218	5.88155	0.383762	8.16843	0.342034	0.0702956	0.00797559	1.18605	0.143438	0.122422	0.00512616	0.346233	0.0262362	0.00271192	936.107	465.31	465.336	744.492	62.3478	62.7965	794.125	192.08	192.248	523.455	108.214	108.52	79.5307
Mudtank_Annealed	2012	OC17A415	ok	0.00429188	580.834	5.76491	0.356503	8.18354	0.360184	0.0675814	0.007231	1.13815	0.131679	0.122197	0.00537827	0.380423	0.0333844	0.00311076	854.839	444.423	444.446	743.194	65.4208	65.847	771.63	178.548	178.719	663.754	123.697	124.127	86.9396
Mudtank_Annealed	2012	OC17A419	ok	-0.00617736	581.745	5.85364	0.36965	8.22404	0.299791	0.0588504	0.00659266	0.986225	0.116183	0.121595	0.00443249	0.309432	0.0379336	0.00308647	560.617	488.232	488.241	739.736	53.9311	54.4426	696.792	164.172	164.324	752.538	122.461	123.018	131.95
Mudtank_Annealed	2012	OC17A416	ok	0.00756827	581.017	5.68655	0.378818	8.05975	0.31212	0.0706126	0.0084053	1.20746	0.151144	0.124073	0.00480483	0.309373	0.0387959	0.00279513	945.329	487.483	487.508	753.966	58.3957	58.8868	804.024	201.287	201.451	769.324	110.855	111.498	79.7569
Mudtank_Annealed	2012	OC17A423	ok	-0.00637629	569.823	5.51139	0.366426	8.08522	0.299887	0.0590465	0.00721678	1.0065	0.128556	0.123682	0.00458747	0.290393	0.0371014	0.00342362	567.864	532.025	532.034	751.724	55.764	56.2749	707.106	180.632	180.773	736.326	135.892	136.374	132.377
Mudtank-Annealed	2016	MA10D511	ok	0.00503481	2324.88	12.1878	0.905946	8.69482	0.165405	0.0669459	0.00309565	1.06115	0.0530587	0.115011	0.0021879	0.380458	0.0338209	0.00116422	835.185	192.666	192.716	701.784	26.7006	27.6191	734.389	73.4408	73.8151	672.29	46.2844	47.4495	84.0273
Mudtank-Annealed	2016	MA10D337	ok	0.00865647	2410.18	12.348	0.981986	8.64128	0.158996	0.0700467	0.00266105	1.11718	0.047157	0.115724	0.00212926	0.435896	0.0353471	0.00120464	928.828	155.978	156.055	705.902	25.9766	26.9307	761.622	64.2974	64.7568	702.106	47.8561	49.0847	75.9992
Mudtank-Annealed	2016	MA10D532	ok	0.00441053	1689.17	8.83708	0.759465	8.61086	0.220829	0.0666256	0.00369001	1.06637	0.0650842	0.116132	0.00297826	0.420185	0.0349995	0.00157371	825.184	231.128	231.169	708.264	36.3275	37.0203	736.957	89.9582	90.2663	695.319	62.5282	63.4554	85.831
Mudtank-Annealed	2016	MA10D459	ok	0.00190406	1776.11	9.35104	0.709067	8.62904	0.195018	0.0645223	0.00340322	1.03053	0.0591347	0.115888	0.00261909	0.393849	0.0342419	0.00153759	757.88	222.501	222.537	706.851	31.95	32.7325	719.192	82.5386	82.8583	680.52	61.1157	62.0244	93.267
Mudtank-Annealed	2016	MA10D206	ok	0.000678164	2652.45	13.1798	0.921529	8.6262	0.160493	0.0635207	0.00296828	1.01486	0.0510446	0.115926	0.00215683	0.369909	0.0347137	0.00117778	724.788	198.185	198.222	707.072	26.3105	27.256	711.329	71.5553	71.9158	689.738	46.8034	48.0157	97.5557
Mudtank-Annealed	2016	MA10D005	ok	-0.00749402	1629.51	9.03982	0.699933	8.59489	0.17451	0.0568716	0.00302585	0.911942	0.0519329	0.116348	0.00236233	0.356538	0.03863	0.00176786	485.597	234.867	234.881	709.51	28.8117	29.6835	658.09	74.9532	75.2479	766.094	70.1191	71.123	146.111
Mudtank-Annealed	2016	MA10D304	ok	-0.00270259	1774.67	8.84407	0.644407	8.56394	0.193083	0.0608842	0.00321579	0.979812	0.0562696	0.116769	0.00263267	0.39259	0.0369312	0.00182171	634.207	227.374	227.398	711.938	32.1027	32.8928	693.508	79.655	79.963	733.009	72.3143	73.2064	112.256
Mudtank-Annealed	2016	MA10D533	ok	-0.00156732	1581.62	8.61371	0.622855	8.49996	0.189473	0.0619685	0.00335797	1.00477	0.0588735	0.117648	0.00262249	0.380432	0.0370778	0.00172716	672.09	231.813	231.84	717.01	31.9658	32.7704	706.228	82.7616	83.069	735.866	68.5563	69.5039	106.684
OG-1_Annealed	2016	JN01A007	ok	0.00666953	146391	109.557	0.604842	1.41339	0.0101279	0.301609	0.00128713	29.4101	0.245286	0.707521	0.00506989	0.859174	0.200551	0.00264074	3477.83	13.2128	22.6543	3449.11	49.4305	60.4031	3467.3	57.8362	67.6299	3694.4	97.2914	112.975	99.174
OG-1_Annealed	2016	JN01A324	ok	0.00265328	245392	157.265	0.569862	1.41056	0.0087555	0.299197	0.00099	29.2333	0.205626	0.708938	0.00440045	0.882448	0.188443	0.0023336	3465.4	10.2538	21.0086	3454.45	42.8843	55.2084	3461.38	48.6945	59.9646	3489.52	86.4254	102.036	99.6842
OG-1_Annealed	2016	JN01A322	ok	-0.00347016	246454	153.864	0.936892	1.39558	0.00955443	0.299522	0.00115139	29.5793	0.232245	0.71655	0.00490566	0.871952	0.184413	0.00228212	3467.08	11.911	21.8728	3483.1	47.6922	59.191	3472.94	54.5363	64.8613	3420.86	84.6669	99.9796	100.462
OG-1_Annealed	2016	JN01A323	ok	-0.00683744	186455	112.031	0.530582	1.39307	0.0103858	0.29761	0.0013714	29.4433	0.258055	0.717839	0.00535172	0.85063	0.180377	0.00255444	3457.15	14.2886	23.2118	3487.94	52.0075	62.7473	3468.41	60.7976	70.1849	3351.86	94.9364	108.293	100.891
OG-1_Annealed	2016	JN01A133	ok	-0.00596242	150264	93.3439	0.759737	1.39266	0.0110384	0.298511	0.0014676	29.5412	0.275535	0.718052	0.00569141	0.849798	0.188214	0.0028128	3461.84	15.2395	23.828	3488.74	55.3048	65.5105	3471.67	64.7615	73.6609	3485.63	104.183	117.429	100.777
OG-1_Annealed	2016	JN01A240	ok	-0.00582376	201421	137.189	0.54941	1.3925	0.00851372	0.29869	0.00105886	29.5623	0.208928	0.718134	0.00439067	0.865099	0.188052	0.00230545	3462.77	10.9878	21.3645	3489.05	42.6641	55.2581	3472.37	49.0812	60.3436	3482.87	85.3973	101.112	100.759
QingHu_Annealed	2016	JN01A320	ok	0.00207363	44671.4	845.776	0.549512	40.295	0.351	0.0508643	0.000737527	0.17397	0.00294273	0.0248169	0.000216174	0.514966	0.0079269	0.000208252	233.682	66.9209	66.9323	158.027	2.75308	3.17951	162.858	5.50956	5.75032	159.589	8.38528	8.74451	67.6249
QingHu_Annealed	2016	JN01A005	ok	-0.000666963	41023.9	898.513	0.469654	40.2	0.344784	0.0486885	0.000727353	0.166921	0.00287537	0.0248756	0.000213351	0.497897	0.00791209	0.000145179	131.833	70.246	70.2494	158.396	2.71704	3.15023	156.744	5.40009	5.6278	159.292	5.8457	6.34845	120.149
QingHu_Annealed	2016	JN01A296	ok	0.00258996	41195.5	812.052	0.39225	39.8736	0.35909	0.0513106	0.000706925	0.177351	0.00291912	0.0250792	0.000225856	0.547139	0.00818758	0.000143008	253.809	63.355	63.3692	159.677	2.876	3.29459	165.779	5.45729	5.70885	164.816	5.7575	6.30175	62.9124
QingHu_Annealed	2016	JN01A077	ok	0.00350746	34678.2	753.554	0.442915	39.644	0.346505	0.0520611	0.000958311	0.180987	0.00368801	0.0252245	0.000220473	0.428932	0.0085293	0.00015855	287.1	84.1406	84.1543	160.591	2.80726	3.23933	168.91	6.8838	7.09245	171.665	6.38212	6.91749	55.9354
QingHu-Annealed	2016	MA10D536	ok	0.00185871	39266.7	900.432	0.484475	40.7706	0.517206	0.0506547	0.00131334	0.171232	0.0049425	0.0245275	0.00031115	0.439495	0.00771886	0.000200804	224.14	119.869	119.875	156.206	3.96319	4.26366	160.487	9.26474	9.40574	155.416	8.08624	8.43939	69.6912
QingHu-Annealed	2016	MA10D487	ok	-0.000759993	41167.7	1002.96	0.486259	40.7214	0.350253	0.0485723	0.000671422	0.164391	0.00267639	0.0245571	0.00021122	0.528308	0.00780335	0.000128909	126.213	65.0671	65.0705	156.393	2.69033	3.11699	154.54	5.03201	5.26898	157.111	5.19087	5.73664	123.912
QingHu-Annealed	2016	MA10D172	ok	0.00157553	37242.9	862.917	0.527333	40.4962	0.30269	0.0504511	0.000648881	0.171699	0.00255416	0.0246937	0.000184573	0.502463	0.0078495	0.00011984	214.823	59.5634	59.5743	157.252	2.35077	2.83394	160.893	4.78681	5.05563	158.036	4.82557	5.41484	73.2009
QingHu-Annealed	2016	MA10D007	ok	0.00122864	40102.9	987.704	0.466119	40.3693	0.321885	0.050185	0.00059545	0.17133	0.00244923	0.0247713	0.000197514	0.557769	0.00793243	0.000120571	202.562	55.0715	55.0819	157.74	2.51548	2.97461	160.573	4.59089	4.86946	159.699	4.85478	5.45261	77.8727
QingHu-Annealed	2016	MA10D053	ok	0.000257862	37742.3	893.148	0.538234	40.0894	0.314242	0.0494344	0.000598358	0.169947	0.00245071	0.0249442	0.000195526	0.543568	0.00807156	0.000117708	167.471	56.543	56.5499	158.828	2.48996	2.95896	159.373	4.59646	4.87068	162.489	4.73919	5.37021	94.839
QingHu-Annealed	2016	MA10D370	ok	-0.000393266	42553.2	996.994	0.513058	39.5119	0.327182	0.0489639	0.000543616	0.170789	0.00236549	0.0253089	0.000209572	0.597863	0.00841551	0.000133063	145.08	52.0781	52.0838	161.121	2.66836	3.1225	160.104	4.43497	4.72112	169.384	5.35651	5.96861	111.057
Temora_Annealed	2016	JN01A105	ok	0.00167938	16975.9	127.43	0.503191	15.2623	0.138355	0.056279	0.000936519	0.508204	0.00963026	0.0655208	0.000593954	0.478381	0.02132	0.000386019	462.429	73.752	73.7926	409.113	7.41733	8.48366	417.241	15.8131	16.366	426.394	15.4406	16.803	88.4704
Temora_Annealed	2016	JN01A325	ok	-0.000357633	35951.2	254.943	0.599883	15.1654	0.109997	0.0546946	0.000626034	0.497054	0.00673537	0.0659396	0.000478268	0.535263	0.0204513	0.000313347	398.787	51.294	51.3374	411.646	5.97145	7.26805	409.706	11.1035	11.8509	409.197	12.5391	14.06	103.225
Temora_Annealed	2016	JN01A326	ok	0.000261716	22729.9	160.085	0.444429	15.0789	0.12235	0.0552517	0.000801405	0.504996	0.00839298	0.0663178	0.000538103	0.48821	0.0196989	0.000398396	421.45	64.7441	64.7824	413.933	6.71732	7.90443	415.078	13.7971	14.4212	394.287	15.9484	17.0854	98.2165
Temora_Annealed	2016	JN01A052	ok	0.000332769	12208.3	92.704	0.295249	15.0711	0.146401	0.0553142	0.00130311	0.505828	0.0128897	0.0663519	0.000644542	0.381203	0.0213456	0.000582718	423.974	105.111	105.135	414.14	8.0459	9.06154	415.64	21.183	21.5958	426.902	23.3082	24.2343	97.6804
Temora_Annealed	2016	JN01A217	ok	0.0012733	22994	172.101	0.332312	15.0395	0.119	0.0560956	0.000775014	0.514053	0.00818441	0.0664917	0.000526118	0.496977	0.0205379	0.000415761	455.187	61.3097	61.357	414.985	6.56716	7.7829	421.171	13.4112	14.0709	410.912	16.6366	17.8206	91.168
Temora_Annealed	2016	JN01A267	ok	0.000359295	14707.1	107.548	0.301916	15.0531	0.128674	0.0553475	0.00103837	0.506739	0.0104472	0.0664315	0.000567856	0.414619	0.0210586	0.000500762	425.317	83.6865	83.7168	414.62	7.08835	8.22557	416.254	17.1634	17.6718	421.222	20.0328	21.0757	97.4851
Temora_Annealed	2016	JN01A008	ok	0.00230197	12518.9	91.5068	0.343023	14.9458	0.165635	0.0569897	0.00145003	0.525519	0.0145844	0.0669083	0.0007415	0.399328	0.0218538	0.000660028	490.175	112.23	112.26	417.502	9.25379	10.1632	428.832	23.8023	24.1939	436.957	26.3939	27.2538	85.1741
TASDOL_Annealed	2012	NO09A250	ok		55899.9	2980.9	1.20203	36.317	0.3493	0.0510842	0.000753886	0.19386	0.0034149	0.0275353	0.000264837	0.546008	NA	NA	243.63	112.23	112.237	175.104	3.36833	3.80155	179.918	6.3386	6.59442	NA	NA	NA	71.8731
TASDOL_Annealed	2012	NO09A244	ok		71714.9	3146.38	2.90689	35.6047	0.303852	0.0507833	0.000505275	0.196574	0.00257673	0.0280862	0.000239689	0.651046	NA	NA	230	112.23	112.236	178.559	3.04766	3.53811	182.223	4.77723	5.12014	NA	NA	NA	77.6345
TASDOL_Annealed	2012	NO09A242	ok		60657.4	2797.48	1.8352	35.0495	0.310797	0.0501846	0.000473898	0.197333	0.00255623	0.0285311	0.000252995	0.684535	NA	NA	202.541	112.23	112.235	181.348	3.21616	3.69802	182.867	4.73767	5.08561	NA	NA	NA	89.5367
TASDOL_Annealed	2012	NO09A249	ok		46047.6	2094.7	1.32781	35.086	0.313975	0.0489432	0.000605532	0.192252	0.00293554	0.0285014	0.00025505	0.586061	NA	NA	144.088	112.23	112.232	181.162	3.24233	3.71988	178.549	5.4526	5.74363	NA	NA	NA	125.73
TASDOL_Annealed	2012	NO09A248	ok		45795.1	2047.08	2.57712	34.8104	0.317883	0.0509764	0.000647105	0.201824	0.00315604	0.0287271	0.000262331	0.583969	NA	NA	238.761	112.23	112.237	182.577	3.33452	3.80736	186.669	5.83808	6.13553	NA	NA	NA	76.4685
TASDOL_Annealed	2012	NO09A245	ok		76745.3	3506.52	1.90808	34.8541	0.293211	0.0493054	0.000434687	0.194963	0.0023758	0.028691	0.000241363	0.690349	NA	NA	161.362	112.23	112.233	182.35	3.06805	3.57512	180.855	4.40776	4.77195	NA	NA	NA	113.007
TASDOL_Annealed	2012	NO09A246	ok		63787.2	2703.35	1.38847	32.3778	0.287445	0.104301	0.00132332	0.44397	0.00687493	0.0308854	0.000274196	0.573315	NA	NA	1701.22	112.23	112.59	196.087	3.48166	4.00214	373.048	11.5534	12.1534	NA	NA	NA	11.5263
TASDOL_Annealed	2012	NO09A243	ok		93750.4	5206.86	3.33415	34.7083	0.330421	0.0503682	0.000871302	0.200002	0.00394908	0.0288115	0.000274283	0.482139	NA	NA	211.012	112.23	112.235	183.106	3.4863	3.94345	185.128	7.31078	7.54655	NA	NA	NA	86.775
TASDOL_Annealed	2012	NO09A241	ok		76962.7	3419.61	2.97494	34.3119	0.297845	0.0500488	0.000436834	0.20103	0.00247465	0.0291444	0.000252989	0.705169	NA	NA	196.249	112.23	112.235	185.191	3.21512	3.71636	185.998	4.57921	4.95026	NA	NA	NA	94.3653
TASDOL_Annealed	2012	OC23A204	ok		60638.7	2704.36	1.82881	34.5917	0.297753	0.0504197	0.000652048	0.200882	0.00312071	0.0289087	0.000248835	0.554077	NA	NA	213.379	112.23	112.236	183.714	3.16269	3.66357	185.872	5.77507	6.07311	NA	NA	NA	86.0976
TASDOL_Annealed	2012	OC23A203	ok		66266.8	2996.73	1.50231	34.5423	0.289029	0.0499449	0.000626033	0.199275	0.00300321	0.02895	0.000242236	0.555209	NA	NA	191.418	112.23	112.234	183.974	3.07876	3.59271	184.512	5.56147	5.86597	NA	NA	NA	96.111
TASDOL_Annealed	2012	OC23A198	ok		90412.4	3903.97	1.78982	34.5142	0.285869	0.0500669	0.000596226	0.199924	0.00290004	0.0289736	0.000239977	0.57099	NA	NA	197.087	112.23	112.235	184.121	3.05001	3.56887	185.062	5.36892	5.68557	NA	NA	NA	93.4212
TASDOL_Annealed	2012	OC23A199	ok		67323.3	2729.13	2.68923	34.4324	0.359038	0.051558	0.00105399	0.206368	0.00473584	0.0290424	0.000302835	0.454378	NA	NA	264.858	112.23	112.239	184.552	3.84878	4.27358	190.5	8.74341	8.95301	NA	NA	NA	69.6797
TASDOL_Annealed	2012	OC23A207	ok		28786.5	1293.8	1.92295	34.4719	0.314041	0.0495322	0.000872111	0.198032	0.00392582	0.0290092	0.000264275	0.459543	NA	NA	172.085	112.23	112.234	184.344	3.35877	3.83718	183.46	7.27387	7.50661	NA	NA	NA	107.124
TASDOL_Annealed	2012	OC23A205	ok		98252.2	4408.83	2.18846	34.4059	0.288658	0.050009	0.000586298	0.200322	0.00288795	0.0290648	0.000243848	0.581955	NA	NA	194.402	112.23	112.235	184.693	3.09906	3.61384	185.398	5.34561	5.6647	NA	NA	NA	95.0056
TASDOL_Annealed	2012	OC23A202	ok		59711	2565.45	1.73489	34.2312	0.295828	0.04983	0.000692726	0.200623	0.00328401	0.0292131	0.000252462	0.527952	NA	NA	186.056	112.23	112.234	185.622	3.20831	3.71265	185.653	6.07793	6.36114	NA	NA	NA	99.7664
TASDOL_Annealed	2012	OC23A200	ok		72775.4	3207.24	1.35676	34.1693	0.290045	0.0499914	0.000600141	0.201637	0.00296463	0.029266	0.000248424	0.577338	NA	NA	193.581	112.23	112.235	185.953	3.15691	3.67002	186.511	5.48445	5.79954	NA	NA	NA	96.0593
TASDOL_Annealed	2012	OC23A201	ok		91801.9	4033.55	1.07082	34.2047	0.278051	0.0489874	0.000571092	0.197384	0.00280527	0.0292358	0.000237658	0.571972	NA	NA	146.206	112.23	112.233	185.763	3.02015	3.55206	182.91	5.19913	5.5182	NA	NA	NA	127.056
TASDOL_Annealed	2012	OC17A401	ok		49228.6	2135.02	1.26029	35.2607	0.313093	0.0494161	0.000567488	0.193148	0.00280379	0.0283602	0.000251821	0.611684	NA	NA	166.606	112.23	112.233	180.277	3.20149	3.67994	179.312	5.20588	5.51248	NA	NA	NA	108.205
TASDOL_Annealed	2012	OC17A407	U in analog, used beginning only		126419	5089.37	1.56492	34.9068	0.330788	0.0504866	0.000636387	0.199333	0.00314344	0.0286477	0.000271474	0.600913	NA	NA	216.453	112.23	112.236	182.079	3.45087	3.90731	184.561	5.821	6.11274	NA	NA	NA	84.1195
TASDOL_Annealed	2012	OC17A411	used beginning only		113408	4649.81	2.44568	34.8713	0.386943	0.0505331	0.00064814	0.19972	0.00338721	0.0286769	0.000318208	0.654271	NA	NA	218.583	112.23	112.236	182.262	4.04488	4.44144	184.889	6.27137	6.544	NA	NA	NA	83.3834
TASDOL_Annealed	2012	OC17A402	ok		79332.7	3408.27	1.62362	34.8268	0.279155	0.0503744	0.000502685	0.199347	0.00255155	0.0287136	0.000230154	0.626234	NA	NA	211.296	112.23	112.235	182.492	2.92553	3.45435	184.573	4.72491	5.08004	NA	NA	NA	86.3677
TASDOL_Annealed	2012	OC17A408	Used beginning only		91888.2	3675.71	1.63814	34.7988	0.313345	0.050124	0.000690366	0.198515	0.00326665	0.0287366	0.000258758	0.547205	NA	NA	199.739	112.23	112.235	182.636	3.28909	3.76792	183.869	6.05128	6.33036	NA	NA	NA	91.4375
TASDOL_Annealed	2012	OC17A403	U in analog, used beginning		120544	4685.02	0.726156	34.7361	0.343684	0.0512071	0.000723341	0.203171	0.00350393	0.0287885	0.000284837	0.573699	NA	NA	249.162	112.23	112.238	182.961	3.62049	4.06191	187.806	6.47787	6.7504	NA	NA	NA	73.4307
TASDOL_Annealed	2012	OC17A409	used beginning only		184614	7344.21	2.29378	34.5371	0.351654	0.0502704	0.000536727	0.200604	0.00295961	0.0289544	0.000294812	0.690137	NA	NA	206.506	112.23	112.235	184.001	3.74697	4.17967	185.637	5.47759	5.79019	NA	NA	NA	89.1018
TASDOL_Annealed	2012	OC17A410	full of common Pb		58681.5	2064.31	2.49843	26.963	0.527782	0.22525	0.00639212	1.15136	0.0396919	0.0370879	0.000725972	0.5678	NA	NA	3017.9	112.23	113.36	234.757	9.19044	9.48932	777.883	53.6336	54.2071	NA	NA	NA	7.77882
TASDOL_Annealed	2012	OC17A404	ok		65516.4	2821.25	1.74051	34.1822	0.276446	0.0505386	0.000571664	0.203768	0.00283344	0.029255	0.000236599	0.581612	NA	NA	218.833	112.23	112.236	185.884	3.00666	3.54124	188.309	5.23698	5.57228	NA	NA	NA	84.9434
TASDOL-Un-annealed	2012	SE19B031	ok		63757.5	2772.98	1.94253	34.6793	0.543756	0.0501315	0.00115964	0.199229	0.00556751	0.0288357	0.000452131	0.561082	NA	NA	200.085	112.23	112.235	183.257	5.74679	6.03554	184.474	10.3103	10.4777	NA	NA	NA	91.5895
TASDOL-Un-annealed	2012	SE19B030	ok		73588.4	3225.66	2.10273	34.6093	0.465205	0.0498238	0.00115544	0.198407	0.00531818	0.028894	0.000388382	0.50147	NA	NA	185.766	112.23	112.234	183.622	4.93637	5.271	183.777	9.85209	10.0257	NA	NA	NA	98.846
TASDOL-Un-annealed	2012	SE19B032	ok		52010.6	2218.78	1.55299	34.4171	0.432481	0.0517426	0.00149107	0.207198	0.00651381	0.0290553	0.000365105	0.399709	NA	NA	273.055	112.23	112.239	184.633	4.64015	4.99844	191.199	12.0216	12.1761	NA	NA	NA	67.6175
TASDOL-Un-annealed	2012	SE19B041	ok		73960.3	2946.15	2.32826	34.2527	0.594009	0.0554231	0.00132588	0.223002	0.0065891	0.0291948	0.000506295	0.586922	NA	NA	428.36	112.23	112.253	185.507	6.4341	6.69954	204.405	12.0792	12.2547	NA	NA	NA	43.3063
TASDOL-Un-annealed	2012	SE19B042	ok		64778.2	2788.38	1.97803	33.7351	0.365149	0.065095	0.00211203	0.265936	0.00909586	0.0296427	0.000320853	0.316462	NA	NA	776.492	112.23	112.305	188.312	4.07657	4.49565	239.439	16.3792	16.5571	NA	NA	NA	24.2516
TASDOL-Un-annealed	2012	SE19B033	ok		61773	2648.06	3.17744	34.3981	0.510005	0.0490337	0.00135258	0.196459	0.00615248	0.0290714	0.000431029	0.473438	NA	NA	148.422	112.23	112.233	184.734	5.47793	5.78489	182.126	11.4072	11.5548	NA	NA	NA	124.465
TASDOL-Un-annealed	2012	SE19B036	ok		70541.8	2893.73	1.93274	34.2328	0.380058	0.0494086	0.00112167	0.198917	0.00502689	0.0292118	0.000324314	0.43932	NA	NA	166.249	112.23	112.233	185.613	4.12142	4.52507	184.21	9.31043	9.49486	NA	NA	NA	111.648
TASDOL-Un-annealed	2012	SE19B035	ok		62860	2530.18	2.32856	34.2079	0.390275	0.0496698	0.000810558	0.200115	0.0039846	0.029233	0.000333518	0.57298	NA	NA	178.557	112.23	112.234	185.746	4.23833	4.63235	185.223	7.37617	7.61015	NA	NA	NA	104.026
TASDOL-Un-annealed	2012	SE19B028	OK		40569.9	1671.83	2.14803	33.9468	0.421738	0.0521835	0.00143893	0.211859	0.00640744	0.0294578	0.000365968	0.410776	NA	NA	292.466	112.23	112.241	187.154	4.65021	5.01725	195.111	11.8019	11.9656	NA	NA	NA	63.9917
TASDOL-Un-annealed	2012	SE19B034	ok		67667.9	2842.81	2.9102	33.9361	0.581713	0.0477167	0.00126659	0.193786	0.00612316	0.0294672	0.000505109	0.542491	NA	NA	84.2158	112.23	112.231	187.213	6.41818	6.68907	179.854	11.3659	11.5105	NA	NA	NA	222.301
TASDOL-Un-annealed	2012	DE13B259	Analog in Beginning & middle, small interval		126786	8620.72	1.26199	34.9125	0.433731	0.0524748	0.000881898	0.207148	0.00432928	0.028643	0.000355843	0.594436	NA	NA	305.163	112.23	112.241	182.05	4.52334	4.88038	191.157	7.99014	8.22053	NA	NA	NA	59.6566
TASDOL-Un-annealed	2012	DE13B252	Used 1st part of analysis- older @ end		100366	5641.97	1.76586	34.7186	0.312737	0.0491878	0.000581369	0.195257	0.00290164	0.028803	0.00025945	0.60615	NA	NA	155.773	112.23	112.233	183.052	3.29778	3.77755	181.105	5.38266	5.68554	NA	NA	NA	117.512
TASDOL-Un-annealed	2012	DE13B260	common pb in middle, Analog @ very beginning		88480.1	4873.92	1.39645	34.4327	0.338738	0.0509197	0.000805622	0.203811	0.00379711	0.0290422	0.000285708	0.52804	NA	NA	236.191	112.23	112.237	184.551	3.63111	4.07864	188.346	7.01797	7.2717	NA	NA	NA	78.1362
TASDOL-Un-annealed	2012	DE13B261	Perfect		55411.1	3335.92	2.11169	34.4011	0.283013	0.0496566	0.000512305	0.198937	0.00262507	0.0290688	0.000239145	0.62346	NA	NA	177.937	112.23	112.234	184.718	3.03929	3.56284	184.227	4.86192	5.20646	NA	NA	NA	103.811
TASDOL-Un-annealed	2012	DE13B257	High Th, Analog @ very beginning		111193	7536.61	2.55155	34.3154	0.29367	0.0497974	0.000419144	0.2	0.0024007	0.0291415	0.000249392	0.712956	NA	NA	184.533	112.23	112.234	185.173	3.16941	3.67679	185.126	4.44433	4.82234	NA	NA	NA	100.346
TASDOL-Un-annealed	2012	DE13B256	ok		80836.6	4925.8	2.6935	34.2175	0.268408	0.0495055	0.00041129	0.199396	0.0022783	0.0292248	0.000229244	0.68652	NA	NA	170.824	112.23	112.233	185.695	2.91324	3.46125	184.615	4.21883	4.61325	NA	NA	NA	108.705
TASDOL-Un-annealed	2012	DE13B254	Analog in 1st half		115627	7818.9	1.93321	33.9806	0.300021	0.0504156	0.000523286	0.204478	0.00278636	0.0294286	0.00025983	0.647932	NA	NA	213.19	112.23	112.236	186.971	3.3016	3.80026	188.908	5.14839	5.49121	NA	NA	NA	87.7018
TASDOL-Un-annealed	2012	DE13B258	Small interval. Analog throughout		124731	9161.03	1.56513	34.0016	0.391094	0.049775	0.00111908	0.201755	0.00509518	0.0294104	0.000338284	0.455455	NA	NA	183.485	112.23	112.234	186.857	4.29853	4.69196	186.61	9.42541	9.61237	NA	NA	NA	101.838
TASDOL-Un-annealed	2012	DE18A029	older @ end		102269	4927.07	2.29339	35.7156	0.340029	0.0494598	0.000581199	0.190857	0.00288644	0.027999	0.000266564	0.62951	NA	NA	168.67	112.23	112.233	178.013	3.38953	3.83394	177.36	5.36465	5.65638	NA	NA	NA	105.539
TASDOL-Un-annealed	2012	DE18A025	Metamict, Pb disturbed		152871	7565.69	1.85528	35.2148	0.387327	0.0528346	0.000593909	0.206779	0.00325199	0.0283972	0.000312339	0.699373	NA	NA	320.713	112.23	112.243	180.509	3.97082	4.36673	190.846	6.00283	6.30528	NA	NA	NA	56.2836
TASDOL-Un-annealed	2012	DE18A028	Older & Reverse discordant in 2nd half		108994	5448.77	1.47624	35.1434	0.351386	0.0494956	0.00057015	0.194104	0.00296075	0.0284549	0.00028451	0.655504	NA	NA	170.36	112.23	112.233	180.87	3.61692	4.04922	180.125	5.49504	5.78892	NA	NA	NA	106.17
TASDOL-Un-annealed	2012	DE18A027	Increasing age throughout		95297.5	4682.14	1.9839	34.8958	0.345507	0.0512734	0.000533738	0.202503	0.00290923	0.0286567	0.000283733	0.689186	NA	NA	252.139	112.23	112.238	182.136	3.60668	4.04584	187.242	5.37996	5.70328	NA	NA	NA	72.2363
TASDOL-Un-annealed	2012	DE18A030	Variable U-Pb, older @ end		48004.4	2160.41	1.82056	34.7938	0.380846	0.0490911	0.000961772	0.194452	0.00436388	0.0287407	0.000314589	0.487738	NA	NA	151.163	112.23	112.233	182.662	3.99876	4.40115	180.421	8.09799	8.30087	NA	NA	NA	120.838
TASDOL-Un-annealed	2012	DE18A026	Older @ end		50557.1	2362.94	2.5863	34.6309	0.401058	0.0499753	0.000855355	0.198886	0.00411006	0.0288759	0.00033441	0.560401	NA	NA	192.833	112.23	112.234	183.509	4.25041	4.63438	184.183	7.61243	7.83686	NA	NA	NA	95.1648
TASDOL-Un-annealed	2012	DE18A024	older in middle to end		58885.7	2707.95	1.50153	34.4427	0.358414	0.0498078	0.000915372	0.199303	0.00420921	0.0290338	0.000302128	0.49272	NA	NA	185.022	112.23	112.234	184.498	3.83981	4.26527	184.536	7.79468	8.01484	NA	NA	NA	99.717
TASDOL-Un-annealed	2013	JA16A030	slightly older @ very end		43440.1	1765.68	2.88013	34.7302	0.357173	0.0580638	0.000930785	0.230415	0.0043884	0.0287933	0.000296117	0.539976	NA	NA	531.217	112.23	112.265	182.992	3.76386	4.19033	210.541	8.01979	8.29745	NA	NA	NA	34.4477
TASDOL-Un-annealed	2013	JA16A269	variable U/Pb, massive Th inclusion in middle giving Pb loss		108793	4081.67	1.19461	34.9164	0.576764	0.0516345	0.000780789	0.203809	0.00456421	0.0286398	0.000473085	0.737609	NA	NA	268.261	112.23	112.239	182.03	6.0137	6.2866	188.344	8.43577	8.648	NA	NA	NA	67.8554
TASDOL-Un-annealed	2013	JA16A035	ok		43609.9	1791.54	1.89263	34.9459	0.304197	0.0504008	0.000649884	0.198771	0.00309239	0.0286156	0.000249093	0.559522	NA	NA	212.511	112.23	112.235	181.878	3.16642	3.65751	184.086	5.72784	6.02261	NA	NA	NA	85.5853
TASDOL-Un-annealed	2013	JA16A031	Metamict, Variable U/Pb		113438	4922.75	1.83174	34.7153	0.300591	0.0498913	0.000361065	0.198069	0.00223519	0.0288058	0.000249422	0.767288	NA	NA	188.92	112.23	112.234	183.07	3.17031	3.66689	183.491	4.14135	4.53785	NA	NA	NA	96.9035
TASDOL-Un-annealed	2013	JA16A266	U in analog, metamict, older in 2nd half		132700	5120.41	1.40495	34.6546	0.373776	0.0499477	0.000563097	0.19864	0.00309922	0.0288562	0.000311235	0.691296	NA	NA	191.548	112.23	112.234	183.385	3.9559	4.36532	183.975	5.74083	6.03461	NA	NA	NA	95.7387
TASDOL-Un-annealed	2013	JA16A032	slightly older @ end		85670	3312.62	1.73124	34.4406	0.303696	0.0498842	0.000567529	0.19962	0.00287335	0.0290355	0.000256033	0.612607	NA	NA	188.587	112.23	112.234	184.509	3.25398	3.74662	184.805	5.3202	5.63873	NA	NA	NA	97.8377
TASDOL-Un-annealed	2013	JA16A270	ok		55504.3	2231.66	1.76085	34.3402	0.294832	0.0495032	0.000489131	0.198675	0.00260061	0.0291204	0.000250016	0.6559	NA	NA	170.716	112.23	112.233	185.041	3.17737	3.68298	184.004	4.81715	5.16387	NA	NA	NA	108.391
TASDOL-Un-annealed	2013	JA30B320	older in 2nd half		33965.4	1504.55	1.73913	34.7077	0.336358	0.0497924	0.00106096	0.19772	0.00462822	0.0288121	0.000279223	0.414011	NA	NA	184.301	112.23	112.234	183.109	3.54908	3.99908	183.195	8.57645	8.77415	NA	NA	NA	99.3534
TASDOL-Un-annealed	2013	JA30B325	older in 2nd half		101506	4226.19	1.91993	34.3295	0.287612	0.055048	0.00106596	0.220997	0.00466278	0.0291294	0.000244046	0.397082	NA	NA	413.199	112.23	112.251	185.097	3.10149	3.61802	202.739	8.55512	8.79723	NA	NA	NA	44.7962
TASDOL-Un-annealed	2013	JA30B321	slightly older in 2nd half		102040	4212.03	1.78628	34.3742	0.247763	0.050269	0.000596365	0.201549	0.00279779	0.0290916	0.000209687	0.519242	NA	NA	206.442	112.23	112.235	184.86	2.66488	3.25015	186.436	5.17599	5.5085	NA	NA	NA	89.5457
TASDOL-Un-annealed	2013	JA30B323	older in 2nd half		83396.8	3261.78	2.71649	34.0503	0.288377	0.0485535	0.000699598	0.196523	0.00328457	0.0293683	0.000248724	0.506726	NA	NA	125.303	112.23	112.232	186.594	3.16057	3.67646	182.179	6.0897	6.36213	NA	NA	NA	148.914
TASDOL-Un-annealed	2013	JN12B071	ok		23056.8	2106.96	2.1594	34.5309	0.431223	0.051774	0.00104946	0.206641	0.00491971	0.0289596	0.000361648	0.524531	NA	NA	274.445	112.23	112.239	184.033	4.59643	4.95562	190.73	9.0818	9.28425	NA	NA	NA	67.0566
TASDOL-Un-annealed	2013	JN12B072	ok		83412.9	7829.97	3.10447	34.0912	0.391227	0.0496636	0.000557662	0.200775	0.00322356	0.0293331	0.000336624	0.714761	NA	NA	178.265	112.23	112.234	186.373	4.2776	4.67084	185.781	5.96566	6.25435	NA	NA	NA	104.548
TASDOL-Un-annealed	2013	JN12B073	ok		9340.2	844.253	2.18089	34.7969	0.559666	0.0489296	0.00176174	0.193796	0.00764227	0.0287382	0.00046222	0.407859	NA	NA	143.438	112.23	112.232	182.646	5.8753	6.15619	179.863	14.1857	14.3017	NA	NA	NA	127.335
TASDOL-Un-annealed	2013	JN12B074	ok		25178.2	2206.74	2.16242	34.4531	0.47472	0.0476642	0.00110179	0.190667	0.00513098	0.0290249	0.000399926	0.512017	NA	NA	81.6016	112.23	112.231	184.443	5.08277	5.41118	177.198	9.53704	9.70384	NA	NA	NA	226.028
TASDOL-Un-annealed	2013	JN12B075	ok		33097.4	2981.18	2.342	34.042	0.419389	0.0497881	0.00083055	0.201568	0.00418008	0.0293755	0.000361899	0.594072	NA	NA	184.097	112.23	112.234	186.639	4.59868	4.96756	186.452	7.73322	7.95965	NA	NA	NA	101.381
TASDOL-Un-annealed	2013	JN12B076	older in 2nd half		92389.7	7581.92	1.43591	34.2676	0.424114	0.0514094	0.000842135	0.206762	0.00424499	0.0291821	0.000361172	0.602826	NA	NA	258.228	112.23	112.238	185.427	4.58988	4.95482	190.832	7.83586	8.06988	NA	NA	NA	71.8075
TASDOL-Un-annealed	2013	JN12B077	metamict, U in analog		207652	17830	1.66	34.4989	0.519811	0.0529289	0.000718148	0.211446	0.00428732	0.0289864	0.000436751	0.743111	NA	NA	324.763	112.23	112.243	184.201	5.55089	5.85232	194.765	7.89819	8.13994	NA	NA	NA	56.7188
TASDOL-Un-annealed	2013	MA13A220	variable U/Pb, slightly reverse discordant		74514.2	4881.03	4.82923	35.3842	0.475369	0.0489947	0.000433131	0.190833	0.00306901	0.0282612	0.000379675	0.835364	NA	NA	146.558	112.23	112.233	179.657	4.82719	5.15476	177.339	5.70402	5.97915	NA	NA	NA	122.584
TASDOL-Un-annealed	2013	MA13A219	ok		61845.3	4048.74	2.16238	34.5418	0.449717	0.0513757	0.000534961	0.204986	0.00341739	0.0289504	0.00037692	0.780953	NA	NA	256.724	112.23	112.238	183.976	4.79055	5.13598	189.337	6.31298	6.5968	NA	NA	NA	71.663
TASDOL-Un-annealed	2013	MA13A223	ok		98430.9	6474.07	3.90664	33.7145	0.435752	0.0494299	0.000462371	0.202062	0.00322382	0.0296609	0.00038336	0.810099	NA	NA	167.255	112.23	112.233	188.425	4.87072	5.22691	186.87	5.96286	6.25499	NA	NA	NA	112.658
TASDOL-Un-annealed	2013	MA13A224	ok		149173	10557.6	2.31154	33.482	0.466201	0.0500527	0.000333554	0.206029	0.00318037	0.0298668	0.000415863	0.902014	NA	NA	196.429	112.23	112.235	189.715	5.28315	5.61763	190.215	5.8725	6.17935	NA	NA	NA	96.5816
TASDOL-Un-annealed	2013	MA13A221	ok		52643.3	3388.35	1.47243	33.2141	0.428858	0.0490771	0.000590872	0.203643	0.00359515	0.0301077	0.000388748	0.731379	NA	NA	150.497	112.23	112.233	191.222	4.9381	5.29992	188.204	6.64518	6.91222	NA	NA	NA	127.061
TASDOL-Un-annealed	2013	MA13A225	common Pb @ end		58358.2	3651.03	3.00077	32.8223	0.468751	0.0514473	0.00075739	0.216026	0.00443084	0.0304671	0.000435115	0.696295	NA	NA	259.921	112.23	112.238	193.471	5.52611	5.85916	198.597	8.14671	8.39048	NA	NA	NA	74.4345
TASDOL-Un-annealed	2013	MA13A222	ok		100898	6689.38	2.33729	32.8124	0.417211	0.0494699	0.000472246	0.207786	0.00330374	0.0304763	0.000387508	0.799704	NA	NA	169.148	112.23	112.233	193.529	4.92145	5.29291	191.693	6.09573	6.39638	NA	NA	NA	114.414
1 concentration uncertainty c.10%
2 data not corrected for common-Pb
3 data corrected corrected for common-Pb
4 Concordance calculated as (206Pb-238U age/207Pb-206Pb age)*100
Decay constants of Jaffey et al. (1971) used for 235U and 238U, while 232Th decay constants are from Amelin & Zaitsev 2002.
bd = below detection; NA = not available
Uncertainties quoted without components related to systematic error unless otherwise stated
Total systematic uncertainties (ssys): 206Pb/238U = 1.01%, 207Pb/206Pb = 0.28%, 207Pb/235U= 1.05%, and 208Pb/232Th = 2.42% (2s)

## Sheet: Validation material
Zircon RM	Year	file name	206Pb/238U age (Ma)	2 sigma uncertainty (Ma)
Temora	2015	AP30C160	418.759	16.1283	2015-04-30
Temora	2015	AP30C161	407.819	15.3421	2015-04-30
Temora	2015	AP30C162	415.321	15.4692	2015-04-30
Temora	2015	AP30C163	413.652	15.2686	2015-04-30				Wtd Mean (from internal errs)	2-sigma err. of mean	MSWD
Temora	2015	AP30C164	426.178	17.2338	2015-04-30			April 29, 2015	418.838	4.09286	1.86466	2015-04-29	416.8
Temora	2015	AP30C165	405.122	17.013	2015-04-30			April 30, 2015	413.763	7.77058	0.341638	2015-04-30	416.8
Temora	2016	Fe04A147	407.53	16.8649	2016-02-04			August 14, 2015	418.862	4.72594	0.236283	2015-08-14	416.8
Temora	2016	Fe04A027	412.375	19.3773	2016-02-04			February 4, 2016	415.902	9.94928	0.890457	2016-02-04	416.8
Temora	2016	Fe04A065	424.524	25.7508	2016-02-04			May25, 2016	415.438	3.33526	0.761944	2016-05-25	416.8
Temora	2016	Fe04A112	426.596	20.3489	2016-02-04			June 24, 2016	416.865	3.54488	0.77439	2016-06-24	416.8
Temora	2016	Fe04A165	427.57	16.8749	2016-02-04			April 30, 2015	423.854	5.88532	1.70014	2015-04-30	416.8
Temora	2016	Fe04A005	433.211	17.561	2016-02-04			September 23, 2016	420.904	5.81911	0.576296	2016-09-23	416.8
Temora	2015	AP30C234	413.747	25.6152	2015-04-30			June 9, 2016	414.243	4.66198	0.325258	2016-06-08	416.8
Temora	2015	AP30C233	409.42	15.4624	2015-04-30			June 8, 2016	415.395	3.72045	0.904001	2016-06-09	416.8
Temora	2015	AP30C232	427.065	9.43461	2015-04-30			March 13, 2014	414.86	6.21241	0.521974	2014-03-13	416.8
Temora	2015	AP30C231	427.182	9.15554	2015-04-30
Temora	2016	SE23A005	423.761	11.7651	2016-09-23
Temora	2016	SE23A025	414.547	13.3113	2016-09-23
Temora	2016	SE23A047	424.622	10.9497	2016-09-23
Temora	2016	SE23A069	419.009	10.9614	2016-09-23
Temora	2016	SE23A092	409.078	14.0316	2016-09-23
Temora	2016	SE23A115	408.401	12.014	2016-09-23
Temora	2016	SE23A140	417.438	12.7686	2016-09-23
Temora	2015	AP29A043	408.621	10.9861	2015-04-29
Temora	2015	AP29A160	417.013	12.0396	2015-04-29
Temora	2015	AP29A374	417.805	11.4198	2015-04-29
Temora	2015	AP29A005	436.738	13.8344	2015-04-29
Temora	2015	AP29A313	415.215	11.8767	2015-04-29
Temora	2015	AP29A315	416.507	10.8045	2015-04-29
Temora	2015	AP29A316	417.536	11.4616	2015-04-29
Temora	2015	AP29A314	426.883	10.9427	2015-04-29
Temora	2015	AU14A031	417.265	9.34273	2015-08-14
Temora	2015	AU14A006	417.326	9.56198	2015-08-14
Temora	2015	AU14A012	418.769	9.25629	2015-08-14
Temora	2015	AU14A032	422.239	9.66345	2015-08-14
Temora	2016	MY25B2210	410.292	8.48234	2016-05-25
Temora	2016	MY25B2075	414.746	7.30306	2016-05-25
Temora	2016	MY25B2386	414.477	6.91688	2016-05-25
Temora	2016	MY25B2302	417.357	6.4576	2016-05-25
Temora	2016	MY25B2033	420.174	8.99272	2016-05-25
Temora	2016	JN24B259	413.748	7.56418	2016-06-24
Temora	2016	JN24B379	414.456	7.90055	2016-06-24
Temora	2016	JN24B422	415.743	8.02158	2016-06-24
Temora	2016	JN24B279	418.916	7.69659	2016-06-24
Temora	2016	JN24B337	422.417	8.55662	2016-06-24
Temora	2016	JN09A007	410.158	11.5304	2016-06-09
Temora	2016	JN09A097	412.093	9.49703	2016-06-09
Temora	2016	JN09A175	414.987	8.69623	2016-06-09
Temora	2016	JN09A316	417.443	10.111	2016-06-09
Temora	2016	JN09A343	417.298	15.0808	2016-06-09
Temora	2016	JN08C510	409.952	7.69484	2016-06-08
Temora	2016	JN08C355	413.548	9.22449	2016-06-08
Temora	2016	JN08C410	416.369	10.029	2016-06-08
Temora	2016	JN08C481	417.204	8.88455	2016-06-08
Temora	2016	JN08C333	419.254	6.90174	2016-06-08
Temora	2014	MA13A096	407.61	14.0711	2014-03-13
Temora	2014	MA13A227	413.268	14.7712	2014-03-13
Temora	2014	MA13A154	414.219	16.6196	2014-03-13
Temora	2014	MA13A004	414.465	15.2267	2014-03-13
Temora	2014	MA13A023	416.286	17.639	2014-03-13
Temora	2014	MA13A060	423.315	13.9628	2014-03-13

## Sheet: Detector Linearity
	Agilent 7900										Agilent 7700
ID	File #	U ppm	U238/U235	U238/U235 error 1 sigma %						ID	File #	U ppm	U238/U235	U238/U235 error 1 sigma %
91500	AU14A003.csv	69.6481	124.588	3.69843						91500	SE23A003.csv	83.1356	143.58	7.26605
91500	AU14A004.csv	66.4804	143.455	3.89614						91500	SE23A004.csv	81.7318	141.35	7.21338
91500	AU14A019.csv	67.4105	138.734	3.55975						91500	SE23A023.csv	83.013	148.096	7.3249
91500	AU14A020.csv	65.4543	137.867	3.51577						91500	SE23A024.csv	81.2672	133.264	7.40523
91500	AU14A040.csv	67.6124	133.369	3.79612						91500	SE23A045.csv	82.3978	152.983	7.43427
91500	AU14A041.csv	65.4659	131.831	3.72942						91500	SE23A046.csv	86.8609	141.264	7.5089
91500	AU14A061.csv	62.7729	141.982	3.76392						91500	SE23A067.csv	79.6681	151.516	7.25105
91500	AU14A062.csv	62.6606	139.583	3.61303						91500	SE23A068.csv	85.4799	126.927	7.32608
[truncated: 143 more rows]
