# Supplementary material for: Impact of air, laser pulse width and fluence on U–Pb dating of zircons by LA-ICPMS
Source: Royal Society of Chemistry journal article supplement (doi:10.1039/c7ja00357a), 2018-01-01
Supplement: c7ja00357a2.pdf [file c7ja00357a2.pdf]

Data reporting template (metadata) for LA-ICP-MS U- Pb data

|                                                                                   |                                                                                                                                                                                                                                                                                                             |
|-----------------------------------------------------------------------------------|-------------------------------------------------------------------------------------------------------------------------------------------------------------------------------------------------------------------------------------------------------------------------------------------------------------|
| <b>Laboratory &amp; Sample Preparation</b>                                        |                                                                                                                                                                                                                                                                                                             |
| Laboratory name                                                                   | Dept. of Earth Science, University of Tasmania – CODES                                                                                                                                                                                                                                                      |
| Sample type/mineral                                                               | Zircon                                                                                                                                                                                                                                                                                                      |
| Sample preparation                                                                | Conventional mineral separation, 1 inch resin mount, 0.3µm alumina polish. Cleaned in DI H <sub>2</sub> O degassed in vacuum.                                                                                                                                                                               |
| <b>Laser ablation system</b>                                                      |                                                                                                                                                                                                                                                                                                             |
| Make, Model & type                                                                | ASI Resolution S155-L and Resolution S155-SE                                                                                                                                                                                                                                                                |
| Ablation cell & volume                                                            | Two volume laser cell with a 8.8 cm <sup>3</sup> small 2 <sup>nd</sup> volume fixed cup.                                                                                                                                                                                                                    |
| Laser wavelength (nm)                                                             | 193nm for both systems                                                                                                                                                                                                                                                                                      |
| Pulse width (ns)                                                                  | 20ns for the S155-L and 5ns for the S155-SE                                                                                                                                                                                                                                                                 |
| Fluence (J.cm <sup>-2</sup> )                                                     | 2.0 J.cm <sup>-2</sup> unless otherwise noted.                                                                                                                                                                                                                                                              |
| Repetition rate (Hz)                                                              | 5Hz                                                                                                                                                                                                                                                                                                         |
| Ablation duration (secs)                                                          | 30secs                                                                                                                                                                                                                                                                                                      |
| Ablation pit depth / ablation rate                                                | 8 to 10µm pit depth, optical interferometry, equivalent to 0.05-6 µm/pulse                                                                                                                                                                                                                                  |
| Spot size (µm)                                                                    | 29µm for the 20ns laser and 30µm for the 5ns laser.                                                                                                                                                                                                                                                         |
| Sampling mode / pattern                                                           | Static spot ablation                                                                                                                                                                                                                                                                                        |
| Carrier gas                                                                       | 100% He in the cell set to 0.35 l/min, Ar carrier gas combined in 2 <sup>nd</sup> volume of laser cell and was set to 1.05 l/min.                                                                                                                                                                           |
| <b>ICP-MS Instrument</b>                                                          |                                                                                                                                                                                                                                                                                                             |
| Make, Model & type                                                                | Agilent 7900 ICP-MS for the 20ns laser and Agilent 7700 for the 5ns laser.                                                                                                                                                                                                                                  |
| Sample introduction                                                               | Ablation aerosol mixed with argon and sent into ICP-MS                                                                                                                                                                                                                                                      |
| RF power (W)                                                                      | 1350W                                                                                                                                                                                                                                                                                                       |
| Make-up gas flow (l/min)                                                          | 0.0                                                                                                                                                                                                                                                                                                         |
| Detection system                                                                  | Electron multiplier with Pb and U in pulse counting mode                                                                                                                                                                                                                                                    |
| Masses measured                                                                   | <sup>49</sup> Ti, <sup>56</sup> Fe, <sup>91</sup> Zr, <sup>178</sup> Hf, <sup>202</sup> Hg, <sup>204</sup> Pb, <sup>206</sup> Pb, <sup>207</sup> Pb, <sup>208</sup> Pb, <sup>232</sup> Th, <sup>235</sup> U, and <sup>238</sup> U                                                                           |
| Integration time per peak/dwell times (ms); quadrupole settling time between mass | 2ms dwell time for <sup>56</sup> Fe, <sup>91</sup> Zr, & <sup>178</sup> Hf<br>10ms dwell for <sup>49</sup> Ti, <sup>202</sup> Hg, <sup>208</sup> Pb, <sup>232</sup> Th and <sup>235</sup> U<br>15ms dwell for <sup>204</sup> Pb & <sup>238</sup> U<br>25ms dwell for <sup>206</sup> Pb & <sup>207</sup> Pb. |

|                                                    |                                                                                                                                                                                                                             |
|----------------------------------------------------|-----------------------------------------------------------------------------------------------------------------------------------------------------------------------------------------------------------------------------|
| jumps                                              |                                                                                                                                                                                                                             |
| Total integration time per output                  | ~180ms                                                                                                                                                                                                                      |
| ‘Sensitivity’ as useful yield cps/ppm              | 2,200 cps / ppm on $^{238}\text{U}$ in 91500 zircon using a 29 $\mu\text{m}$ spot at 5Hz, 2J/cm <sup>2</sup> and assuming ~80 ppm U in 91500. Total ablation is ~6275 cubic microns assuming at 9.5 micron crater depth     |
| IC Dead time (ns)                                  | 37                                                                                                                                                                                                                          |
| <b>Data Processing</b>                             |                                                                                                                                                                                                                             |
| Gas blank                                          | 30 seconds                                                                                                                                                                                                                  |
| Calibration strategy                               | 91500 used as primary reference material for Pb/U and Pb/Th ratios. NIST610 used for Pb isotope ratios ( $^{207}\text{Pb}/^{206}\text{Pb}$ ) and trace element concentrations.                                              |
| Reference Material info                            | 91500 (Wiedenbeck et al 1995)<br>NIST610 (Jochum et al. 2011)                                                                                                                                                               |
| Data processing package used / Correction for LIEF | In-house macro based Excel workbook “zirccalc”                                                                                                                                                                              |
| Mass discrimination                                | Corrected using standard - sample bracketing                                                                                                                                                                                |
| Common-Pb correction, composition and uncertainty  | Common Pb correction applied to Monastery, Mudtank, Penglai, SP07-05, and Qing Hu zircons using Stacey-Kramer’s model Pb at age of zircon and 0.01 uncertainty (1 sigma absolute) common Pb composition.                    |
| Uncertainty level & propagation                    | Ages are quoted at 2sigma absolute, propagation is by quadratic addition of components of random error from unknowns and reference materials, uncertainty in drift corrections, etc. as described by Horstwood et al. 2016. |
| Quality control / Validation                       | See Table1.                                                                                                                                                                                                                 |
